# Supplementary material for: Self-restoration of cardiac excitation rhythm by anti-arrhythmic ion channel gating
Source: eLife. 2020 Jun 8;9:e55921. doi: 10.7554/eLife.55921 (PMC7316504; doi:10.7554/eLife.55921)
Supplement: Figure 5—source data 1. — There are 22 columns, the first 11 for the voltage measurement, the next 11 for the injected current measurement. The first column indicates the time, the subsequent columns are measurements that follow each other in time. [file elife-55921-fig5-data1.csv]

Time	Trace1	Trace2	Trace3	Trace4	Trace5	Trace6	Trace7	Trace8	Trace9	Trace10	Time2.1	Trace1.1	Trace2.1	Trace3.1	Trace4.1	Trace5.1	Trace6.1	Trace7.1	Trace8.1	Trace9.1	Trace10.1
0.2	-64.819	-66.406	-66.406	-66.406	15.869	12.329	11.719	-50.293	-60.303	-60.669	0.2	0.162	0.162	0.162	0.544	-0.677	-0.219	-0.677	0.086	-0.143	0.162
0.4	-64.941	-66.406	-66.284	-66.406	15.747	12.085	11.597	-49.683	-59.937	-60.669	0.4	0.162	0.467	0.086	0.086	-0.677	0.086	-0.296	0.162	-0.296	0.162
0.6	-64.819	-66.528	-66.284	-66.284	15.503	11.963	11.353	-49.072	-59.57	-60.669	0.6	0.162	0.62	-0.143	-0.525	-0.525	0.086	-0.296	0.162	-0.067	0.238
0.8	-64.819	-66.528	-66.284	-66.406	15.381	11.719	11.108	-48.462	-59.204	-60.669	0.8	0.162	-0.143	0.162	0.467	-0.525	-0.601	-0.906	-0.219	0.086	0.162
1	-64.941	-66.528	-66.284	-66.284	15.259	11.597	10.864	-47.852	-58.716	-60.669	1	0.162	0.162	0.162	0.544	-0.677	-0.219	-0.677	0.086	-0.143	0.162
1.2	-64.941	-66.528	-66.284	-66.284	15.015	11.353	10.742	-47.363	-58.228	-60.791	1.2	0.162	0.467	0.086	0.086	-0.677	0.086	-0.296	0.162	-0.296	0.162
1.4	-64.819	-66.65	-66.284	-66.284	14.893	11.108	10.498	-46.631	-57.617	-60.791	1.4	0.162	0.62	-0.143	-0.525	-0.525	0.086	-0.296	0.162	-0.067	0.238
1.6	-64.819	-66.528	-66.284	-66.284	14.771	10.986	10.498	-46.021	-57.129	-60.791	1.6	0.162	0.544	-0.372	-0.601	-0.448	-0.219	-0.601	0.238	0.391	0.467
1.8	-64.819	-66.528	-66.284	-66.406	14.526	10.864	10.254	-45.41	-56.519	-60.913	1.8	0.162	0.544	-0.448	-0.219	-0.525	-0.601	-0.677	0.467	0.544	0.62
2	-64.941	-66.528	-66.162	-66.406	14.404	10.498	10.132	-44.8	-55.908	-60.913	2	0.086	0.62	-0.448	0.086	-0.677	-0.601	-0.525	0.62	0.162	0.467
2.2	-64.941	-66.65	-66.284	-66.406	14.282	10.376	9.888	-44.067	-55.42	-61.035	2.2	-0.143	0.467	-0.448	0.162	-0.601	-0.219	-0.448	0.391	-0.219	0.315
2.4	-64.819	-66.528	-66.284	-66.406	14.038	10.132	9.644	-43.579	-54.81	-60.913	2.4	-0.372	0.315	-0.448	0.162	-0.143	0.086	-0.448	-0.067	-0.067	0.544
2.6	-64.819	-66.528	-66.284	-66.284	13.916	10.01	9.399	-42.847	-54.321	-61.035	2.6	-0.448	0.467	-0.448	0.162	0.391	0.086	-0.372	-0.219	0.391	1.001
2.8	-64.941	-66.528	-66.284	-66.406	13.794	9.766	9.155	-42.236	-53.711	-61.035	2.8	-0.372	0.544	-0.296	0.162	0.544	-0.143	-0.143	0.162	0.62	1.23
3	-64.941	-66.528	-66.284	-66.406	13.55	9.644	8.911	-41.626	-53.101	-61.035	3	-0.143	0.162	0.086	0.162	0.086	-0.372	0.01	0.544	0.467	1.001
3.2	-64.941	-66.528	-66.406	-66.406	13.55	9.277	8.667	-40.894	-52.49	-61.157	3.2	0.086	-0.143	0.238	0.238	-0.525	-0.448	-0.219	0.544	0.315	0.544
3.4	-64.819	-66.528	-66.284	-66.406	13.306	9.155	8.545	-40.161	-51.88	-61.157	3.4	0.162	0.238	0.01	0.467	-0.601	-0.448	-0.525	0.544	0.391	0.238
3.6	-64.819	-66.406	-66.406	-66.406	13.184	8.911	8.301	-39.429	-51.27	-61.279	3.6	0.162	0.849	0.01	0.544	-0.219	-0.448	-0.296	0.544	0.315	0.162
3.8	-64.941	-66.406	-66.284	-66.406	12.939	8.667	8.057	-38.574	-50.659	-61.157	3.8	0.162	0.925	0.391	0.086	0.086	-0.372	0.238	0.086	0.01	0.238
4	-64.819	-66.528	-66.406	-66.406	12.695	8.423	7.812	-37.842	-50.049	-61.157	4	0.162	0.544	0.62	-0.525	0.238	-0.143	0.391	-0.525	-0.067	0.544
4.2	-64.819	-66.406	-66.284	-66.406	12.451	8.179	7.69	-36.865	-49.438	-61.035	4.2	0.238	0.238	0.467	-0.525	0.467	0.01	0.238	-0.525	0.086	0.925
4.4	-64.941	-66.528	-66.284	-66.406	12.329	8.057	7.446	-35.889	-48.828	-60.791	4.4	0.467	0.162	0.238	0.086	0.62	-0.067	0.162	0.086	0.162	0.925
4.6	-64.941	-66.406	-66.284	-66.406	12.085	7.812	7.202	-34.668	-48.218	-60.425	4.6	0.62	0.162	0.238	0.544	0.467	0.01	0.162	0.544	0.238	0.544
4.8	-64.941	-66.406	-66.284	-66.406	11.963	7.568	7.08	-33.325	-47.607	-60.181	4.8	0.467	0.162	0.391	0.467	0.315	0.315	0.162	0.544	0.544	0.315
5	-64.941	-66.528	-66.406	-66.406	11.719	7.324	6.836	-31.738	-47.119	-59.814	5	0.315	0.162	0.315	0.315	0.467	0.391	0.086	0.544	1.001	0.467
5.2	-64.941	-66.528	-66.284	-66.406	11.597	7.08	6.592	-29.663	-46.387	-59.326	5.2	0.467	0.162	0.01	0.467	0.544	0.238	-0.143	0.62	1.23	0.62
5.4	-64.941	-66.406	-66.284	-66.406	11.353	6.958	6.348	-26.733	-45.898	-58.838	5.4	0.62	0.162	-0.067	0.62	0.162	0.162	-0.372	0.467	1.001	0.467
5.6	-64.941	-66.528	-66.284	-66.284	11.108	6.714	6.104	-22.583	-45.166	-58.35	5.6	0.467	0.162	0.162	0.467	-0.219	0.162	-0.448	0.238	0.544	0.238
5.8	-64.941	-66.528	-66.284	-66.284	10.986	6.47	5.859	-15.991	-44.678	-57.861	5.8	0.315	0.162	0.544	0.238	-0.143	0.086	-0.372	0.162	0.238	0.238
6	-64.941	-66.528	-66.284	-66.406	10.742	6.226	5.615	-5.615	-43.945	-57.373	6	0.467	0.238	0.925	0.238	0.086	-0.219	-0.067	0.162	0.086	0.467
6.2	-64.941	-66.528	-66.162	-66.406	10.498	5.981	5.371	5.371	-43.335	-56.763	6.2	0.696	0.544	1.001	0.467	0.162	-0.601	0.391	0.086	-0.219	0.62
6.4	-64.941	-66.406	-66.284	-66.406	10.376	5.737	5.127	12.451	-42.725	-56.152	6.4	0.772	0.925	0.849	0.62	0.162	-0.525	0.62	-0.143	-0.601	0.467
6.6	-64.941	-66.406	-66.162	-66.406	10.132	5.615	4.883	15.625	-42.114	-55.664	6.6	0.696	0.925	0.696	0.467	0.162	0.086	0.467	-0.372	-0.525	0.238
6.8	-64.819	-66.406	-66.284	-66.406	9.888	5.371	4.639	16.968	-41.504	-55.054	6.8	0.467	0.62	0.467	0.315	0.162	0.467	0.238	-0.448	0.086	0.162
7	-64.819	-66.528	-66.284	-66.406	9.766	5.127	4.272	17.578	-40.649	-54.443	7	0.238	0.544	0.238	0.467	0.162	0.162	0.162	-0.448	0.467	0.162
7.2	-64.819	-66.528	-66.284	-66.406	9.521	4.883	4.028	17.822	-40.039	-53.833	7.2	0.238	0.62	0.238	0.62	0.086	-0.219	0.162	-0.525	0.162	0.162
7.4	-64.941	-66.528	-66.284	-66.406	9.277	4.639	3.784	17.944	-39.307	-53.223	7.4	0.467	0.467	0.467	0.467	-0.067	-0.143	0.086	-0.677	-0.143	0.162
7.6	-64.819	-66.528	-66.162	-66.406	9.155	4.395	3.54	17.944	-38.574	-52.612	7.6	0.696	0.238	0.62	0.238	0.01	0.01	-0.219	-0.601	0.162	0.238
7.8	-64.819	-66.528	-66.284	-66.406	8.911	4.028	3.296	17.822	-37.72	-52.124	7.8	0.772	0.238	0.467	0.086	0.315	-0.143	-0.601	-0.143	0.544	0.467
8	-64.941	-66.528	-66.284	-66.406	8.667	3.906	3.052	17.822	-36.987	-51.514	8	0.696	0.544	0.238	-0.143	0.391	-0.296	-0.601	0.391	0.467	0.544
8.2	-64.941	-66.528	-66.284	-66.406	8.423	3.54	2.808	17.7	-36.011	-50.903	8.2	0.467	0.925	0.162	-0.296	0.238	-0.143	-0.219	0.544	0.238	0.162
8.4	-64.819	-66.528	-66.284	-66.406	8.301	3.296	2.563	17.456	-35.034	-50.171	8.4	0.238	0.849	0.162	-0.143	0.162	0.086	0.01	0.086	0.162	-0.219
8.6	-64.819	-66.528	-66.284	-66.406	8.057	3.174	2.319	17.334	-33.813	-49.561	8.6	0.162	0.238	0.162	0.086	0.162	0.086	-0.143	-0.525	0.162	-0.143
8.8	-64.819	-66.528	-66.284	-66.406	7.812	2.808	1.953	17.09	-32.471	-48.95	8.8	0.162	-0.219	0.238	0.162	0.162	-0.143	-0.372	-0.601	0.162	0.086
9	-64.941	-66.528	-66.284	-66.528	7.69	2.563	1.709	16.968	-30.884	-48.34	9	0.238	-0.143	0.544	0.162	0.162	-0.296	-0.448	-0.219	0.238	0.162
9.2	-64.941	-66.528	-66.284	-66.528	7.446	2.319	1.465	16.724	-28.931	-47.729	9.2	0.467	0.086	0.925	0.162	0.162	-0.143	-0.448	0.086	0.467	0.086
9.4	-64.941	-66.528	-66.284	-66.406	7.202	1.953	1.221	16.602	-26.367	-47.119	9.4	0.62	0.238	0.925	0.162	0.162	0.086	-0.448	0.162	0.544	-0.143
9.6	-64.941	-66.528	-66.284	-66.284	6.836	1.709	0.977	16.357	-22.827	-46.509	9.6	0.467	0.467	0.544	0.162	0.086	0.086	-0.372	0.162	0.162	-0.296
9.8	-64.941	-66.528	-66.284	-66.406	6.714	1.465	0.732	16.113	-17.456	-46.021	9.8	0.315	0.62	0.315	0.162	-0.143	-0.143	-0.143	0.086	-0.219	-0.143
10	-64.941	-66.528	-66.284	-66.406	6.47	1.221	0.488	15.869	-9.399	-45.288	10	0.544	0.467	0.467	0.238	-0.296	-0.296	0.086	-0.219	-0.143	0.086
10.2	-64.941	-66.528	-66.284	-66.406	6.226	0.977	0.122	15.747	-0.366	-44.678	10.2	0.925	0.238	0.62	0.467	-0.143	-0.143	0.086	-0.601	0.086	0.162
10.4	-64.941	-66.528	-66.284	-66.406	5.981	0.732	-0.122	15.503	6.836	-44.189	10.4	0.925	0.162	0.467	0.62	0.086	0.086	-0.067	-0.601	0.086	0.162
10.6	-64.941	-66.406	-66.284	-66.406	5.737	0.488	-0.366	15.381	10.742	-43.579	10.6	0.544	0.162	0.238	0.467	0.162	0.162	0.01	-0.219	-0.219	0.086
10.8	-65.063	-66.406	-66.284	-66.406	5.493	0.244	-0.61	15.137	12.573	-42.969	10.8	0.238	0.162	0.162	0.238	0.162	0.162	0.315	0.086	-0.601	-0.219
11	-64.941	-66.406	-66.284	-66.528	5.249	-0.122	-0.854	14.893	13.55	-42.358	11	0.162	0.162	0.162	0.238	0.086	0.162	0.391	0.162	-0.677	-0.601
11.2	-64.941	-66.406	-66.284	-66.528	5.005	-0.366	-1.221	14.771	13.916	-41.626	11.2	0.162	0.162	0.238	0.467	-0.143	0.162	0.162	0.086	-0.601	-0.601
11.4	-65.063	-66.528	-66.284	-66.406	4.761	-0.61	-1.587	14.526	14.282	-41.016	11.4	0.162	0.162	0.544	0.62	-0.372	0.086	-0.067	-0.143	-0.753	-0.219
11.6	-64.941	-66.528	-66.284	-66.528	4.517	-0.854	-1.831	14.282	14.404	-40.405	11.6	0.238	0.162	1.001	0.467	-0.448	-0.143	-0.067	-0.296	-0.906	0.086
11.8	-64.941	-66.528	-66.284	-66.406	4.272	-1.099	-2.075	14.16	14.404	-39.673	11.8	0.467	0.162	1.23	0.238	-0.296	-0.296	0.01	-0.219	-0.677	0.162
12	-64.941	-66.528	-66.284	-66.406	4.028	-1.465	-2.319	13.916	14.404	-38.94	12	0.62	0.162	1.001	0.162	0.086	-0.219	-0.143	-0.296	-0.296	0.162
12.2	-64.941	-66.528	-66.284	-66.406	3.784	-1.709	-2.686	13.794	14.404	-38.086	12.2	0.467	0.162	0.544	0.162	0.238	-0.296	-0.372	-0.677	-0.296	0.086
12.4	-64.941	-66.528	-66.284	-66.406	3.54	-2.075	-2.93	13.55	14.526	-37.354	12.4	0.238	0.162	0.238	0.162	-0.067	-0.601	-0.372	-0.982	-0.601	-0.219
12.601	-64.941	-66.528	-66.284	-66.406	3.296	-2.319	-3.174	13.428	14.404	-36.377	12.601	0.162	0.086	0.162	0.162	-0.448	-0.601	-0.143	-0.982	-0.601	-0.601
12.801	-64.941	-66.528	-66.284	-66.406	3.052	-2.563	-3.54	13.184	14.404	-35.4	12.801	0.162	-0.143	0.162	0.162	-0.677	-0.219	0.01	-0.677	-0.296	-0.601
13.001	-64.941	-66.528	-66.284	-66.406	2.808	-2.808	-3.784	12.939	14.404	-34.302	13.001	0.086	-0.296	0.162	0.162	-0.601	0.01	-0.143	-0.219	-0.296	-0.219
13.201	-64.941	-66.528	-66.284	-66.528	2.563	-2.93	-4.028	12.817	14.282	-33.203	13.201	-0.219	-0.143	0.238	0.162	-0.219	-0.143	-0.296	0.01	-0.601	0.01
13.401	-64.941	-66.528	-66.284	-66.406	2.319	-3.296	-4.272	12.573	14.282	-31.738	13.401	-0.601	0.01	0.467	0.086	0.01	-0.296	-0.219	-0.143	-0.601	-0.219
13.601	-64.941	-66.528	-66.162	-66.406	2.075	-3.54	-4.639	12.451	14.16	-29.907	13.601	-0.601	-0.143	0.62	-0.143	-0.219	-0.219	-0.219	-0.296	-0.219	-0.601
13.801	-64.941	-66.528	-66.284	-66.406	1.709	-3.784	-4.883	12.207	14.16	-27.832	13.801	-0.219	-0.296	0.467	-0.296	-0.677	-0.296	-0.296	-0.219	0.01	-0.677
14.001	-64.941	-66.528	-66.284	-66.406	1.465	-4.028	-5.127	11.963	14.038	-24.902	14.001	0.086	-0.143	0.238	-0.143	-0.982	-0.601	-0.143	-0.296	-0.143	-0.601
14.201	-64.941	-66.528	-66.284	-66.406	1.221	-4.395	-5.493	11.719	13.916	-20.874	14.201	0.162	0.086	0.162	0.086	-1.059	-0.677	0.086	-0.677	-0.372	-0.753
14.401	-64.941	-66.528	-66.284	-66.406	0.977	-4.639	-5.737	11.597	13.916	-14.893	14.401	0.162	0.162	0.162	0.086	-1.059	-0.525	0.086	-0.982	-0.448	-0.906
14.601	-64.941	-66.528	-66.284	-66.406	0.61	-4.883	-5.981	11.353	13.794	-6.836	14.601	0.086	0.162	0.086	-0.143	-1.059	-0.448	-0.143	-1.059	-0.448	-0.677
14.801	-64.941	-66.528	-66.284	-66.406	0.488	-5.127	-6.348	11.108	13.672	1.221	14.801	-0.219	0.162	-0.143	-0.296	-1.059	-0.525	-0.296	-1.059	-0.525	-0.219
15.001	-64.941	-66.406	-66.284	-66.406	0.122	-5.371	-6.592	10.864	13.55	6.836	15.001	-0.601	0.162	-0.296	-0.143	-0.982	-0.677	-0.219	-1.059	-0.753	0.01
15.201	-64.941	-66.528	-66.162	-66.406	-0.122	-5.615	-6.836	10.742	13.55	9.766	15.201	-0.601	0.162	-0.219	0.01	-0.753	-0.677	-0.296	-1.059	-0.906	-0.219
15.401	-64.941	-66.528	-66.284	-66.406	-0.366	-5.859	-7.202	10.498	13.428	11.353	15.401	-0.219	0.086	-0.219	-0.219	-0.601	-0.601	-0.677	-1.059	-0.677	-0.677
15.601	-64.941	-66.406	-66.162	-66.406	-0.61	-6.104	-7.324	10.376	13.306	12.085	15.601	0.01	-0.143	-0.372	-0.601	-0.753	-0.677	-0.982	-1.059	-0.296	-0.906
15.801	-64.941	-66.406	-66.284	-66.406	-0.854	-6.47	-7.69	10.132	13.184	12.451	15.801	-0.143	-0.296	-0.448	-0.601	-0.906	-0.601	-0.982	-0.982	-0.296	-0.753
16.001	-64.941	-66.406	-66.162	-66.406	-1.099	-6.714	-7.935	9.888	13.062	12.695	16.001	-0.372	-0.219	-0.372	-0.296	-0.753	-0.219	-0.753	-0.677	-0.677	-0.601
16.201	-64.941	-66.406	-66.284	-66.406	-1.465	-6.958	-8.179	9.644	12.939	12.939	16.201	-0.448	-0.219	-0.143	-0.219	-0.601	0.086	-0.601	-0.296	-0.906	-0.753
16.401	-64.941	-66.406	-66.284	-66.528	-1.709	-7.202	-8.423	9.399	12.939	12.939	16.401	-0.372	-0.372	0.086	-0.296	-0.753	0.01	-0.753	-0.296	-0.753	-0.906
16.601	-64.941	-66.406	-66.284	-66.406	-2.075	-7.446	-8.667	9.155	12.817	13.062	16.601	-0.219	-0.448	0.086	-0.143	-0.982	-0.525	-0.906	-0.601	-0.601	-0.677
16.801	-64.941	-66.528	-66.284	-66.406	-2.319	-7.69	-8.911	8.911	12.695	13.184	16.801	-0.296	-0.372	-0.067	0.086	-1.059	-1.135	-0.753	-0.601	-0.753	-0.296
17.001	-64.941	-66.406	-66.284	-66.406	-2.563	-7.935	-9.277	8.789	12.451	13.184	17.001	-0.677	-0.143	0.01	0.086	-0.982	-1.211	-0.525	-0.219	-0.906	-0.219
17.201	-64.941	-66.406	-66.284	-66.406	-2.808	-8.179	-9.521	8.545	12.329	13.184	17.201	-0.906	0.01	0.238	-0.143	-0.753	-0.753	-0.448	0.01	-0.753	-0.296
17.401	-64.941	-66.406	-66.284	-66.406	-3.052	-8.423	-9.644	8.423	12.207	13.306	17.401	-0.753	-0.143	0.086	-0.296	-0.525	-0.296	-0.448	-0.219	-0.601	-0.219
17.601	-64.941	-66.528	-66.284	-66.406	-3.54	-8.545	-10.01	8.179	12.085	13.306	17.601	-0.525	-0.296	-0.219	-0.143	-0.448	-0.219	-0.372	-0.601	-0.677	-0.296
17.801	-64.941	-66.528	-66.284	-66.406	-3.662	-8.789	-10.132	8.057	11.963	13.306	17.801	-0.448	-0.143	-0.219	0.01	-0.525	-0.296	-0.219	-0.601	-0.677	-0.677
18.001	-64.941	-66.528	-66.284	-66.406	-3.906	-9.033	-10.376	7.69	11.841	13.184	18.001	-0.448	0.086	-0.296	-0.219	-0.753	-0.219	-0.219	-0.219	-0.525	-0.982
18.201	-64.941	-66.528	-66.284	-66.406	-4.272	-9.399	-10.62	7.446	11.597	13.184	18.201	-0.448	0.086	-0.677	-0.601	-0.906	-0.296	-0.296	0.01	-0.448	-0.982
18.401	-64.941	-66.528	-66.284	-66.406	-4.517	-9.644	-10.864	7.202	11.475	13.184	18.401	-0.525	-0.143	-0.906	-0.601	-0.677	-0.677	-0.143	-0.143	-0.525	-0.753
18.601	-64.941	-66.528	-66.284	-66.406	-4.639	-9.766	-11.108	6.958	11.353	13.184	18.601	-0.677	-0.296	-0.753	-0.219	-0.296	-0.906	0.086	-0.296	-0.677	-0.601
18.801	-64.819	-66.528	-66.284	-66.406	-5.005	-10.01	-11.475	6.836	11.108	13.062	18.801	-0.525	-0.143	-0.525	0.086	-0.219	-0.677	0.086	-0.219	-0.677	-0.677
19.001	-64.941	-66.528	-66.284	-66.406	-5.249	-10.254	-11.719	6.592	10.986	12.939	19.001	0.01	0.086	-0.448	0.086	-0.372	-0.296	-0.219	-0.219	-0.601	-0.601
19.201	-64.941	-66.528	-66.284	-66.406	-5.493	-10.498	-11.841	6.348	10.864	12.939	19.201	0.238	0.162	-0.448	-0.143	-0.448	-0.296	-0.601	-0.372	-0.677	-0.219
19.401	-64.941	-66.528	-66.284	-66.406	-5.737	-10.742	-12.085	5.981	10.62	12.817	19.401	-0.067	0.162	-0.448	-0.296	-0.372	-0.601	-0.601	-0.525	-0.677	0.01
19.601	-64.941	-66.406	-66.284	-66.406	-6.104	-10.986	-12.329	5.737	10.498	12.817	19.601	-0.372	0.162	-0.525	-0.143	-0.143	-0.677	-0.296	-0.753	-0.601	-0.219
19.801	-64.819	-66.406	-66.284	-66.406	-6.348	-11.23	-12.451	5.615	10.376	12.695	19.801	-0.372	0.086	-0.753	0.086	0.086	-0.601	-0.219	-0.982	-0.677	-0.677
20.001	-64.819	-66.406	-66.284	-66.406	-6.592	-11.475	-12.695	5.371	10.254	12.573	20.001	-0.143	-0.143	-0.982	0.162	0.086	-0.753	-0.372	-0.982	-0.601	-0.982
20.201	-64.941	-66.406	-66.284	-66.406	-6.836	-11.719	-12.939	5.005	10.01	12.573	20.201	0.01	-0.296	-0.982	0.162	-0.143	-0.982	-0.448	-0.677	-0.296	-1.059
20.401	-64.819	-66.406	-66.162	-66.406	-7.202	-11.841	-13.184	4.761	9.888	12.451	20.401	-0.143	-0.143	-0.677	0.162	-0.296	-0.982	-0.448	-0.296	-0.296	-1.059
20.601	-64.819	-66.406	-66.284	-66.406	-7.446	-12.085	-13.306	4.395	9.766	12.329	20.601	-0.296	0.01	-0.219	0.162	-0.143	-0.677	-0.448	-0.296	-0.601	-1.059
20.801	-64.941	-66.406	-66.284	-66.406	-7.69	-12.329	-13.672	4.15	9.644	12.329	20.801	-0.219	-0.143	0.086	0.162	0.01	-0.296	-0.448	-0.677	-0.601	-0.982
21.001	-64.941	-66.406	-66.162	-66.406	-7.935	-12.573	-13.794	3.906	9.399	12.207	21.001	-0.219	-0.296	0.162	0.162	-0.219	-0.296	-0.525	-0.906	-0.296	-0.677
21.201	-64.819	-66.406	-66.162	-66.406	-8.179	-12.817	-14.038	3.662	9.277	11.963	21.201	-0.296	-0.143	0.238	0.162	-0.677	-0.601	-0.753	-0.677	-0.296	-0.219
21.401	-64.941	-66.284	-66.162	-66.406	-8.423	-13.062	-14.282	3.418	9.155	11.963	21.401	-0.067	0.086	0.391	0.162	-1.059	-0.601	-0.982	-0.296	-0.601	0.086
21.601	-64.819	-66.284	-66.284	-66.406	-8.667	-13.062	-14.404	3.174	8.911	11.841	21.601	0.315	0.162	0.238	0.162	-1.364	-0.219	-0.982	-0.219	-0.601	0.162
21.801	-64.941	-66.284	-66.284	-66.406	-9.033	-13.428	-14.771	2.93	8.789	11.719	21.801	0.315	0.162	-0.296	0.162	-1.516	0.01	-0.677	-0.296	-0.219	0.162
22.001	-64.941	-66.284	-66.162	-66.406	-9.155	-13.55	-14.893	2.563	8.667	11.597	22.001	0.01	0.162	-0.525	0.162	-1.287	-0.143	-0.219	-0.143	0.086	0.086
22.201	-64.819	-66.284	-66.284	-66.406	-9.399	-13.794	-15.137	2.319	8.423	11.475	22.201	-0.067	0.162	-0.219	0.086	-0.83	-0.296	0.01	0.01	0.162	-0.143
22.401	-64.819	-66.406	-66.162	-66.406	-9.644	-13.916	-15.259	2.075	8.301	11.23	22.401	0.086	0.162	0.086	-0.067	-0.601	-0.143	-0.143	-0.219	0.162	-0.296
22.601	-64.819	-66.284	-66.284	-66.406	-9.888	-14.16	-15.381	1.709	8.057	11.108	22.601	0.086	0.162	0.086	0.01	-0.677	0.086	-0.372	-0.601	0.162	-0.143
22.801	-64.941	-66.284	-66.284	-66.406	-10.132	-14.404	-15.503	1.465	7.935	10.986	22.801	-0.219	0.162	-0.143	0.315	-0.677	0.162	-0.448	-0.601	0.162	0.086
23.001	-64.819	-66.284	-66.284	-66.406	-10.376	-14.526	-15.747	1.221	7.69	10.864	23.001	-0.601	0.162	-0.219	0.391	-0.525	0.162	-0.372	-0.219	0.162	0.086
23.201	-64.819	-66.284	-66.284	-66.406	-10.742	-14.771	-15.869	0.977	7.446	10.742	23.201	-0.525	0.238	0.162	0.238	-0.372	0.162	-0.143	0.086	0.162	-0.219
23.401	-64.819	-66.284	-66.284	-66.406	-10.864	-14.893	-16.113	0.61	7.324	10.62	23.401	0.086	0.467	0.544	0.162	-0.143	0.162	0.01	0.162	0.162	-0.601
23.601	-64.697	-66.284	-66.162	-66.406	-11.108	-15.015	-16.235	0.366	7.08	10.376	23.601	0.544	0.62	0.544	0.162	0.086	0.162	-0.143	0.162	0.162	-0.601
23.801	-64.941	-66.284	-66.284	-66.406	-11.353	-15.259	-16.357	0.122	6.958	10.254	23.801	0.467	0.467	0.544	0.162	0.086	0.162	-0.296	0.162	0.162	-0.219
24.001	-64.941	-66.284	-66.162	-66.406	-11.597	-15.503	-16.602	-0.122	6.836	10.132	24.001	0.238	0.162	0.62	0.162	-0.143	0.238	-0.143	0.162	0.162	0.086
24.201	-64.819	-66.284	-66.162	-66.406	-11.841	-15.625	-16.846	-0.488	6.592	10.01	24.201	0.162	-0.143	0.544	0.162	-0.296	0.391	0.086	0.162	0.238	0.162
24.401	-64.941	-66.284	-66.284	-66.406	-11.963	-15.747	-16.846	-0.732	6.348	9.888	24.401	0.086	-0.219	0.544	0.238	-0.143	0.315	0.162	0.162	0.467	0.162
24.601	-64.941	-66.284	-66.284	-66.406	-12.207	-15.869	-17.09	-0.977	6.104	9.644	24.601	-0.143	0.238	0.62	0.467	0.086	0.01	0.238	0.162	0.544	0.086
24.801	-64.941	-66.284	-66.284	-66.406	-12.451	-16.113	-17.212	-1.221	5.981	9.521	24.801	-0.296	0.849	0.467	0.62	0.162	0.01	0.467	0.162	0.086	-0.143
25.001	-64.941	-66.284	-66.284	-66.406	-12.573	-16.235	-17.334	-1.587	5.737	9.399	25.001	-0.143	0.925	0.238	0.467	0.238	0.391	0.62	0.086	-0.525	-0.296
25.201	-64.941	-66.284	-66.284	-66.406	-12.817	-16.357	-17.578	-1.831	5.493	9.277	25.201	0.01	0.544	0.162	0.315	0.467	0.544	0.467	-0.143	-0.601	-0.143
25.401	-64.941	-66.284	-66.284	-66.406	-13.062	-16.479	-17.7	-2.197	5.249	9.155	25.401	-0.219	0.315	0.238	0.544	0.62	0.162	0.238	-0.296	-0.219	0.086
25.601	-64.819	-66.284	-66.284	-66.406	-13.306	-16.602	-17.944	-2.563	5.127	8.911	25.601	-0.601	0.467	0.544	1.001	0.467	-0.143	0.162	-0.219	0.086	0.162
25.801	-64.941	-66.284	-66.162	-66.406	-13.428	-16.846	-17.944	-2.808	4.883	8.789	25.801	-0.601	0.62	0.925	1.23	0.238	0.162	0.162	-0.296	0.162	0.086
26.001	-64.819	-66.284	-66.284	-66.406	-13.672	-16.968	-18.188	-3.174	4.639	8.667	26.001	-0.143	0.467	0.925	1.001	0.162	0.544	0.162	-0.601	0.238	-0.143
26.201	-64.941	-66.284	-66.284	-66.406	-13.916	-17.212	-18.311	-3.54	4.395	8.545	26.201	0.391	0.315	0.544	0.544	0.162	0.467	0.162	-0.525	0.391	-0.219
26.401	-64.941	-66.284	-66.284	-66.406	-14.16	-17.334	-18.433	-3.906	4.15	8.301	26.401	0.62	0.544	0.315	0.315	0.162	0.238	0.162	0.01	0.315	0.162
26.601	-64.819	-66.162	-66.284	-66.528	-14.282	-17.456	-18.677	-4.15	4.028	8.179	26.601	0.467	0.925	0.391	0.467	0.162	0.162	0.162	0.238	-0.067	0.544
26.801	-64.941	-66.162	-66.162	-66.406	-14.404	-17.578	-18.799	-4.395	3.784	8.057	26.801	0.162	0.925	0.315	0.62	0.238	0.162	0.162	-0.067	-0.372	0.467
27.001	-64.941	-66.284	-66.284	-66.406	-14.648	-17.822	-19.043	-4.761	3.418	7.812	27.001	-0.143	0.544	0.01	0.544	0.467	0.086	0.086	-0.296	-0.372	0.238
27.201	-64.941	-66.162	-66.284	-66.406	-14.893	-17.944	-19.165	-5.005	3.296	7.69	27.201	-0.296	0.315	0.01	0.62	0.62	-0.219	-0.143	-0.143	-0.143	0.086
27.401	-64.941	-66.162	-66.284	-66.406	-15.015	-18.066	-19.165	-5.249	2.93	7.568	27.401	-0.067	0.467	0.391	0.925	0.467	-0.601	-0.296	0.01	0.086	-0.219
27.601	-64.941	-66.162	-66.162	-66.284	-15.259	-18.311	-19.409	-5.615	2.808	7.446	27.601	0.467	0.696	0.62	0.925	0.238	-0.601	-0.143	-0.067	0.162	-0.601
27.801	-64.819	-66.284	-66.284	-66.406	-15.381	-18.555	-19.531	-5.981	2.563	7.202	27.801	0.925	0.772	0.544	0.62	0.162	-0.219	0.086	-0.067	0.086	-0.601
28.001	-64.819	-66.162	-66.284	-66.406	-15.625	-18.677	-19.653	-6.226	2.319	7.08	28.001	0.849	0.696	0.467	0.544	0.086	0.01	0.162	0.01	-0.143	-0.219
28.201	-64.819	-66.284	-66.284	-66.406	-15.869	-18.799	-19.775	-6.47	2.075	6.836	28.201	0.162	0.391	0.315	0.62	-0.143	-0.143	0.162	-0.143	-0.372	0.086
28.401	-64.941	-66.284	-66.284	-66.406	-15.991	-19.043	-19.897	-6.714	1.831	6.714	28.401	-0.525	-0.067	0.01	0.467	-0.372	-0.296	0.162	-0.372	-0.448	0.162
28.601	-64.941	-66.162	-66.162	-66.406	-16.113	-19.165	-20.142	-6.958	1.587	6.47	28.601	-0.601	-0.296	-0.143	0.238	-0.448	-0.067	0.086	-0.448	-0.296	0.086
28.801	-64.941	-66.162	-66.162	-66.406	-16.357	-19.287	-20.142	-7.202	1.343	6.348	28.801	-0.219	-0.067	-0.219	0.162	-0.372	0.315	-0.143	-0.372	0.162	-0.143
29.001	-64.941	-66.284	-66.162	-66.406	-16.479	-19.409	-20.264	-7.568	1.099	6.104	29.001	0.086	0.391	-0.296	0.162	-0.219	0.315	-0.219	-0.143	0.467	-0.296
29.201	-64.941	-66.284	-66.162	-66.406	-16.602	-19.653	-20.508	-7.812	0.854	5.859	29.201	0.086	0.544	-0.143	0.162	-0.219	0.086	0.162	0.086	0.238	-0.143
29.401	-65.063	-66.284	-66.284	-66.528	-16.846	-19.775	-20.63	-8.057	0.61	5.737	29.401	-0.143	0.162	0.086	0.162	-0.372	0.315	0.467	0.086	0.086	0.086
29.601	-64.941	-66.284	-66.284	-66.406	-16.968	-19.897	-20.63	-8.301	0.366	5.493	29.601	-0.219	-0.219	0.162	0.162	-0.448	0.849	0.162	-0.143	0.315	0.162
29.801	-64.941	-66.162	-66.284	-66.528	-17.212	-20.02	-20.752	-8.667	0.122	5.249	29.801	0.162	-0.143	0.162	0.162	-0.372	0.925	-0.296	-0.296	0.391	0.238
30.001	-64.941	-66.284	-66.284	-66.406	-17.334	-20.142	-20.874	-8.911	-0.122	5.127	30.001	0.467	0.086	0.162	0.086	-0.143	0.62	-0.448	-0.143	0.238	0.467
30.201	-65.063	-66.284	-66.284	-66.528	-17.578	-20.264	-21.118	-9.155	-0.366	4.883	30.201	0.162	0.162	0.086	-0.143	0.086	0.544	-0.448	0.086	0.162	0.62
30.401	-65.063	-66.284	-66.284	-66.406	-17.7	-20.386	-21.24	-9.399	-0.61	4.639	30.401	-0.219	0.162	-0.143	-0.219	0.162	0.62	-0.448	0.162	0.162	0.391
30.601	-65.063	-66.406	-66.162	-66.528	-17.822	-20.508	-21.362	-9.644	-0.854	4.395	30.601	-0.143	0.162	-0.219	0.162	0.162	0.467	-0.372	0.162	0.01	0.01
30.801	-65.063	-66.284	-66.284	-66.406	-18.066	-20.63	-21.362	-9.888	-1.099	4.272	30.801	0.086	0.238	0.238	0.544	0.162	0.238	-0.067	0.162	-0.448	-0.067
31.001	-65.063	-66.284	-66.406	-66.406	-18.066	-20.752	-21.484	-10.132	-1.343	4.028	31.001	0.162	0.467	0.849	0.467	0.086	0.162	0.391	0.162	-0.753	0.01
31.201	-64.941	-66.284	-66.284	-66.528	-18.311	-20.996	-21.606	-10.376	-1.709	3.784	31.201	0.238	0.62	0.925	0.315	-0.143	0.162	0.62	0.162	-0.448	-0.143
31.401	-64.941	-66.284	-66.284	-66.528	-18.555	-20.996	-21.851	-10.742	-1.953	3.54	31.401	0.391	0.467	0.544	0.467	-0.296	0.162	0.467	0.162	-0.067	-0.372
31.601	-64.941	-66.284	-66.284	-66.406	-18.677	-21.118	-21.973	-10.986	-2.197	3.418	31.601	0.391	0.315	0.315	0.62	-0.143	0.162	0.238	0.086	-0.219	-0.372
31.801	-64.941	-66.284	-66.406	-66.406	-18.799	-21.362	-22.095	-11.353	-2.441	3.174	31.801	0.315	0.467	0.467	0.467	0.086	0.162	0.162	-0.219	-0.677	-0.143
32.001	-64.941	-66.284	-66.406	-66.406	-19.043	-21.362	-22.095	-11.597	-2.563	2.93	32.001	0.391	0.62	0.62	0.238	0.162	0.086	0.086	-0.677	-0.906	0.01
32.201	-64.941	-66.284	-66.406	-66.406	-19.165	-21.606	-22.217	-11.841	-2.93	2.808	32.201	0.391	0.467	0.467	0.162	0.162	-0.143	-0.219	-0.906	-0.677	-0.143
32.401	-64.819	-66.284	-66.284	-66.406	-19.287	-21.729	-22.339	-12.085	-3.174	2.563	32.401	0.162	0.238	0.238	0.162	0.162	-0.296	-0.601	-0.677	-0.296	-0.296
32.601	-64.941	-66.162	-66.284	-66.406	-19.409	-21.851	-22.461	-12.329	-3.418	2.319	32.601	-0.143	0.162	0.162	0.162	0.162	-0.143	-0.677	-0.219	-0.296	-0.219
32.801	-64.941	-66.284	-66.284	-66.406	-19.653	-21.851	-22.583	-12.573	-3.662	2.075	32.801	-0.296	0.162	0.162	0.162	0.162	0.086	-0.525	0.086	-0.601	-0.296
33.001	-64.941	-66.162	-66.284	-66.406	-19.775	-21.973	-22.705	-12.817	-3.906	1.953	33.001	-0.067	0.162	0.086	0.162	0.162	0.162	-0.448	0.162	-0.601	-0.677
33.201	-64.941	-66.284	-66.284	-66.406	-19.897	-22.095	-22.827	-13.062	-4.15	1.709	33.201	0.391	0.086	-0.143	0.162	0.162	0.086	-0.525	0.162	-0.296	-0.906
33.401	-64.941	-66.162	-66.284	-66.406	-20.02	-22.217	-22.827	-13.306	-4.395	1.465	33.401	0.544	-0.143	-0.296	0.162	0.086	-0.219	-0.677	0.162	-0.219	-0.753
33.601	-64.941	-66.162	-66.284	-66.406	-20.142	-22.461	-22.949	-13.55	-4.639	1.221	33.601	0.162	-0.296	-0.143	0.162	-0.143	-0.601	-0.601	0.086	-0.296	-0.601
33.801	-64.941	-66.162	-66.284	-66.406	-20.264	-22.461	-23.193	-13.794	-4.883	0.977	33.801	-0.219	-0.143	0.01	0.162	-0.296	-0.601	-0.296	-0.219	-0.143	-0.753
34.001	-64.941	-66.162	-66.284	-66.406	-20.508	-22.583	-23.315	-14.038	-5.127	0.732	34.001	-0.143	0.086	-0.143	0.162	-0.143	-0.219	-0.296	-0.601	0.01	-0.982
34.201	-64.941	-66.162	-66.284	-66.406	-20.508	-22.705	-23.438	-14.282	-5.371	0.488	34.201	0.01	0.162	-0.296	0.162	0.086	0.086	-0.601	-0.601	-0.219	-0.982
34.401	-64.941	-66.284	-66.162	-66.406	-20.63	-22.827	-23.438	-14.526	-5.615	0.244	34.401	-0.219	0.162	-0.143	0.086	0.086	0.162	-0.677	-0.296	-0.601	-0.753
34.601	-64.941	-66.162	-66.162	-66.406	-20.874	-22.949	-23.56	-14.771	-5.859	0	34.601	-0.601	0.086	0.086	-0.219	-0.143	0.162	-0.601	-0.296	-0.601	-0.601
34.801	-64.941	-66.284	-66.284	-66.284	-20.874	-23.071	-23.682	-14.893	-6.104	-0.244	34.801	-0.601	-0.143	0.162	-0.601	-0.296	0.086	-0.753	-0.677	-0.219	-0.753
35.001	-65.063	-66.162	-66.284	-66.406	-21.118	-23.193	-23.804	-15.137	-6.348	-0.488	35.001	-0.296	-0.372	0.162	-0.601	-0.143	-0.219	-0.982	-0.906	0.01	-0.982
35.201	-64.941	-66.284	-66.284	-66.406	-21.24	-23.315	-23.926	-15.381	-6.592	-0.732	35.201	-0.296	-0.525	0.162	-0.219	0.01	-0.677	-0.982	-0.753	-0.219	-0.982
35.401	-65.063	-66.284	-66.284	-66.284	-21.362	-23.438	-24.048	-15.503	-6.836	-0.977	35.401	-0.601	-0.677	0.086	0.086	-0.219	-0.906	-0.753	-0.601	-0.677	-0.677
35.601	-64.941	-66.284	-66.284	-66.406	-21.484	-23.438	-24.048	-15.747	-7.08	-1.221	35.601	-0.601	-0.677	-0.143	0.086	-0.677	-0.753	-0.525	-0.753	-0.982	-0.296
35.801	-65.063	-66.162	-66.284	-66.406	-21.606	-23.56	-24.17	-15.869	-7.324	-1.465	35.801	-0.296	-0.601	-0.296	-0.143	-0.906	-0.601	-0.296	-0.906	-1.059	-0.296
36.001	-65.063	-66.284	-66.162	-66.406	-21.729	-23.682	-24.292	-16.113	-7.568	-1.709	36.001	-0.296	-0.677	-0.143	-0.296	-0.677	-0.677	0.162	-0.677	-1.059	-0.601
36.201	-65.063	-66.284	-66.284	-66.406	-21.851	-23.804	-24.292	-16.235	-7.69	-2.075	36.201	-0.677	-0.601	0.086	-0.219	-0.296	-0.677	0.467	-0.296	-0.982	-0.601
36.401	-65.063	-66.284	-66.284	-66.406	-21.973	-23.926	-24.536	-16.479	-8.057	-2.197	36.401	-0.906	-0.296	0.086	-0.296	-0.219	-0.525	0.086	-0.296	-0.677	-0.219
36.601	-65.063	-66.284	-66.284	-66.406	-22.095	-24.048	-24.536	-16.724	-8.301	-2.441	36.601	-0.677	-0.296	-0.219	-0.601	-0.296	-0.448	-0.601	-0.677	-0.219	0.086
36.801	-65.063	-66.284	-66.284	-66.406	-22.339	-24.17	-24.658	-16.846	-8.423	-2.808	36.801	-0.219	-0.601	-0.601	-0.601	-0.219	-0.448	-0.906	-0.906	0.01	0.162
37.001	-65.063	-66.284	-66.284	-66.406	-22.461	-24.17	-24.78	-17.09	-8.667	-3.052	37.001	0.086	-0.601	-0.601	-0.296	-0.219	-0.372	-0.677	-0.677	-0.219	0.086
37.201	-65.063	-66.284	-66.284	-66.406	-22.583	-24.292	-24.902	-17.212	-8.911	-3.174	37.201	0.162	-0.219	-0.219	-0.296	-0.372	-0.143	-0.296	-0.296	-0.601	-0.219
37.401	-65.063	-66.162	-66.284	-66.284	-22.705	-24.414	-25.024	-17.456	-9.155	-3.418	37.401	0.162	0.01	0.086	-0.601	-0.525	0.086	-0.296	-0.296	-0.677	-0.677
37.602	-65.063	-66.284	-66.284	-66.284	-22.827	-24.536	-25.024	-17.578	-9.399	-3.784	37.602	0.086	-0.219	0.086	-0.601	-0.677	0.086	-0.525	-0.677	-0.525	-0.906
37.802	-65.063	-66.284	-66.284	-66.284	-22.827	-24.536	-25.146	-17.822	-9.644	-3.906	37.802	-0.143	-0.601	-0.143	-0.296	-0.601	-0.219	-0.296	-0.906	-0.448	-0.753
38.002	-65.063	-66.162	-66.406	-66.284	-22.949	-24.78	-25.269	-17.944	-9.766	-4.15	38.002	-0.296	-0.601	-0.296	-0.296	-0.296	-0.601	0.162	-0.753	-0.525	-0.601
38.202	-65.063	-66.162	-66.284	-66.284	-23.071	-24.78	-25.391	-18.188	-10.132	-4.517	38.202	-0.143	-0.219	-0.143	-0.677	-0.219	-0.677	0.086	-0.601	-0.677	-0.753
38.402	-65.063	-66.284	-66.284	-66.284	-23.193	-24.902	-25.513	-18.433	-10.376	-4.639	38.402	0.086	0.01	0.086	-0.906	-0.296	-0.525	-0.219	-0.677	-0.601	-0.906
38.602	-64.941	-66.162	-66.162	-66.284	-23.315	-25.024	-25.635	-18.677	-10.498	-4.883	38.602	0.162	-0.219	0.162	-0.677	-0.143	-0.448	-0.143	-0.601	-0.296	-0.677
38.802	-65.063	-66.162	-66.284	-66.284	-23.438	-25.146	-25.635	-18.677	-10.742	-5.127	38.802	0.086	-0.601	0.162	-0.296	0.01	-0.448	0.01	-0.219	-0.296	-0.296
39.002	-64.941	-66.162	-66.284	-66.284	-23.56	-25.269	-25.757	-18.921	-10.986	-5.371	39.002	-0.143	-0.601	0.162	-0.296	-0.219	-0.372	-0.219	0.01	-0.601	-0.219
39.202	-64.941	-66.162	-66.284	-66.284	-23.682	-25.269	-25.757	-19.165	-11.23	-5.615	39.202	-0.372	-0.219	0.162	-0.601	-0.677	-0.219	-0.677	-0.143	-0.525	-0.296
39.402	-65.063	-66.162	-66.284	-66.284	-23.926	-25.391	-25.879	-19.287	-11.475	-5.859	39.402	-0.525	0.086	0.162	-0.601	-0.906	-0.296	-0.906	-0.296	0.086	-0.219
39.602	-65.063	-66.162	-66.284	-66.284	-23.926	-25.513	-26.001	-19.531	-11.597	-6.104	39.602	-0.677	0.162	0.162	-0.143	-0.677	-0.677	-0.677	-0.143	0.467	-0.219
39.802	-64.941	-66.04	-66.284	-66.284	-24.048	-25.513	-26.123	-19.653	-11.841	-6.348	39.802	-0.601	0.238	0.086	0.391	-0.219	-0.906	-0.219	0.01	0.162	-0.372
40.002	-64.941	-66.162	-66.284	-66.284	-24.17	-25.635	-26.245	-19.775	-12.085	-6.714	40.002	-0.143	0.467	-0.219	0.544	0.01	-0.753	0.01	-0.219	-0.219	-0.525
40.202	-64.941	-66.162	-66.284	-66.284	-24.292	-25.757	-26.245	-20.02	-12.329	-6.836	40.202	0.391	0.62	-0.677	0.162	-0.143	-0.601	-0.219	-0.601	-0.219	-0.677
40.402	-65.063	-66.162	-66.284	-66.284	-24.292	-26.001	-26.367	-20.142	-12.573	-7.08	40.402	0.544	0.467	-0.906	-0.219	-0.296	-0.753	-0.601	-0.677	-0.296	-0.601
40.602	-64.941	-66.162	-66.284	-66.162	-24.414	-26.001	-26.367	-20.386	-12.817	-7.202	40.602	0.086	0.162	-0.677	-0.143	-0.143	-0.906	-0.601	-0.601	-0.601	-0.296
40.802	-64.941	-66.162	-66.284	-66.162	-24.536	-26.123	-26.489	-20.508	-13.062	-7.446	40.802	-0.525	-0.143	-0.296	0.086	0.01	-0.677	-0.296	-0.753	-0.677	-0.296
41.002	-65.063	-66.162	-66.284	-66.162	-24.658	-26.245	-26.611	-20.63	-13.184	-7.69	41.002	-0.525	-0.372	-0.296	0.086	-0.143	-0.219	-0.219	-0.982	-0.525	-0.601
41.202	-64.941	-66.162	-66.284	-66.162	-24.78	-26.367	-26.611	-20.874	-13.306	-7.935	41.202	0.01	-0.525	-0.601	-0.219	-0.372	0.01	-0.296	-0.982	-0.448	-0.601
41.402	-64.941	-66.162	-66.284	-66.284	-24.902	-26.489	-26.733	-20.996	-13.55	-8.301	41.402	0.238	-0.677	-0.601	-0.677	-0.525	-0.143	-0.143	-0.601	-0.448	-0.219
41.602	-64.941	-66.162	-66.284	-66.284	-25.024	-26.611	-26.855	-21.118	-13.794	-8.423	41.602	0.01	-0.601	-0.219	-0.982	-0.753	-0.296	0.01	0.086	-0.372	0.086
41.802	-64.941	-66.162	-66.284	-66.162	-25.146	-26.733	-26.978	-21.362	-14.038	-8.667	41.802	-0.067	-0.219	0.086	-1.059	-0.906	-0.143	-0.143	0.467	-0.143	0.162
42.002	-65.063	-66.162	-66.284	-66.162	-25.146	-26.733	-27.1	-21.484	-14.16	-8.911	42.002	0.01	0.086	0.162	-0.982	-0.677	0.086	-0.296	0.162	0.086	0.086
42.202	-64.941	-66.162	-66.284	-66.284	-25.269	-26.855	-27.222	-21.484	-14.282	-9.155	42.202	-0.219	0.162	0.162	-0.677	-0.219	0.162	-0.143	-0.296	0.162	-0.143
42.402	-64.941	-66.162	-66.284	-66.162	-25.391	-26.855	-27.344	-21.606	-14.526	-9.399	42.402	-0.601	0.162	0.162	-0.219	0.01	0.238	0.086	-0.448	0.086	-0.296
42.602	-64.941	-66.162	-66.284	-66.162	-25.513	-26.978	-27.344	-21.851	-14.771	-9.644	42.602	-0.601	0.086	0.162	0.086	-0.143	0.391	0.162	-0.372	-0.067	-0.219
42.802	-64.941	-66.162	-66.284	-66.284	-25.635	-27.1	-27.466	-21.973	-15.015	-9.888	42.802	-0.219	-0.143	0.162	0.162	-0.296	0.238	0.162	-0.143	0.01	-0.219
43.002	-64.941	-66.162	-66.284	-66.162	-25.757	-27.222	-27.588	-22.095	-15.137	-10.01	43.002	0.086	-0.296	0.162	0.162	-0.143	-0.372	0.086	0.086	0.391	-0.296
43.202	-64.941	-66.162	-66.284	-66.162	-25.879	-27.222	-27.588	-22.095	-15.381	-10.254	43.202	0.162	-0.143	0.162	0.162	0.086	-0.753	-0.143	0.238	0.696	-0.143
43.402	-64.941	-66.162	-66.284	-66.162	-26.001	-27.344	-27.71	-22.339	-15.503	-10.498	43.402	0.162	0.086	0.162	0.162	0.086	-0.372	-0.296	0.467	0.696	0.162
43.602	-64.941	-66.162	-66.284	-66.162	-26.123	-27.344	-27.832	-22.461	-15.869	-10.742	43.602	0.238	0.162	0.086	0.162	-0.143	0.238	-0.143	0.62	0.467	0.544
43.802	-64.941	-66.162	-66.162	-66.162	-26.245	-27.466	-27.832	-22.705	-15.991	-10.864	43.802	0.467	0.162	-0.219	0.162	-0.296	0.391	0.086	0.467	0.238	1.001
44.002	-65.063	-66.162	-66.284	-66.162	-26.245	-27.588	-27.954	-22.827	-16.235	-10.986	44.002	0.62	0.238	-0.601	0.162	-0.219	0.238	0.162	0.238	0.162	1.23
44.202	-65.063	-66.162	-66.284	-66.162	-26.489	-27.71	-28.076	-22.827	-16.357	-11.353	44.202	0.467	0.467	-0.525	0.162	-0.219	0.162	0.162	0.238	0.238	1.001
44.402	-64.941	-66.284	-66.284	-66.162	-26.489	-27.832	-28.076	-23.071	-16.479	-11.597	44.402	0.238	0.62	0.086	0.238	-0.296	0.238	0.162	0.467	0.467	0.62
44.602	-64.941	-66.162	-66.284	-66.162	-26.611	-27.832	-28.198	-23.193	-16.724	-11.719	44.602	0.162	0.467	0.544	0.467	-0.143	0.391	0.162	0.696	0.62	0.544
44.802	-64.941	-66.162	-66.284	-66.162	-26.733	-27.954	-28.198	-23.315	-16.846	-11.963	44.802	0.162	0.315	0.467	0.62	0.086	0.315	0.162	0.772	0.467	0.62
45.002	-64.941	-66.162	-66.284	-66.162	-26.855	-28.076	-28.32	-23.438	-17.09	-12.207	45.002	0.162	0.467	0.315	0.467	0.162	0.01	0.162	0.696	0.162	0.467
45.202	-64.941	-66.162	-66.284	-66.162	-26.855	-28.198	-28.442	-23.682	-17.334	-12.451	45.202	0.238	0.62	0.391	0.238	0.162	-0.067	0.162	0.467	-0.143	0.238
45.402	-64.941	-66.162	-66.284	-66.162	-27.1	-28.198	-28.564	-23.804	-17.456	-12.573	45.402	0.544	0.467	0.315	0.162	0.238	0.086	0.086	0.238	-0.296	0.086
45.602	-64.941	-66.162	-66.284	-66.162	-27.1	-28.32	-28.564	-23.926	-17.7	-12.817	45.602	0.925	0.238	0.01	0.238	0.544	0.162	-0.143	0.162	-0.143	-0.143
45.802	-64.941	-66.162	-66.284	-66.162	-27.222	-28.442	-28.687	-24.048	-17.822	-13.062	45.802	1.001	0.238	0.01	0.544	0.925	0.238	-0.296	0.162	0.086	-0.296
46.002	-65.063	-66.04	-66.284	-66.162	-27.344	-28.442	-28.809	-24.17	-17.944	-13.306	46.002	0.849	0.544	0.391	0.925	0.925	0.544	-0.143	0.162	0.162	-0.143
46.202	-65.063	-66.04	-66.284	-66.04	-27.466	-28.687	-28.931	-24.414	-18.188	-13.55	46.202	0.772	1.001	0.62	0.925	0.467	0.849	0.086	0.162	0.162	0.086
46.402	-64.941	-66.162	-66.284	-66.162	-27.588	-28.687	-28.931	-24.536	-18.433	-13.672	46.402	0.849	1.23	0.544	0.544	-0.067	0.62	0.238	0.162	0.162	0.162
46.602	-65.063	-66.162	-66.284	-66.162	-27.71	-28.809	-29.053	-24.536	-18.677	-13.916	46.602	1.001	1.001	0.696	0.238	-0.296	0.162	0.467	0.238	0.086	0.238
46.802	-65.063	-66.162	-66.162	-66.162	-27.71	-28.931	-29.053	-24.78	-18.799	-14.16	46.802	0.925	0.62	1.23	0.162	-0.143	0.238	0.62	0.467	-0.143	0.467
47.002	-65.063	-66.04	-66.284	-66.162	-27.832	-28.931	-29.175	-24.902	-18.921	-14.404	47.002	0.544	0.544	1.383	0.162	0.162	0.544	0.467	0.62	-0.296	0.62
47.202	-65.063	-66.162	-66.284	-66.162	-27.832	-29.175	-29.297	-25.024	-19.165	-14.526	47.202	0.238	0.62	0.849	0.238	0.467	0.467	0.238	0.391	-0.143	0.467
47.402	-65.063	-66.04	-66.162	-66.162	-27.954	-29.175	-29.419	-25.146	-19.287	-14.771	47.402	0.238	0.467	0.315	0.467	0.62	0.238	0.162	0.01	0.086	0.315
47.602	-64.941	-66.04	-66.162	-66.162	-28.076	-29.297	-29.541	-25.269	-19.531	-14.893	47.602	0.544	0.238	0.162	0.62	0.467	0.162	0.162	0.01	0.162	0.467
47.802	-64.941	-66.162	-66.162	-66.162	-28.198	-29.419	-29.541	-25.391	-19.653	-15.137	47.802	0.925	0.162	0.162	0.467	0.238	0.162	0.162	0.315	0.162	0.62
48.002	-64.941	-66.162	-66.162	-66.162	-28.32	-29.419	-29.663	-25.513	-19.775	-15.259	48.002	0.925	0.238	0.238	0.238	0.086	0.162	0.162	0.391	0.238	0.467
48.202	-64.941	-66.162	-66.162	-66.162	-28.32	-29.541	-29.785	-25.635	-19.897	-15.503	48.202	0.544	0.544	0.467	0.238	-0.067	0.162	0.162	0.238	0.467	0.238
48.402	-64.941	-66.04	-66.284	-66.162	-28.564	-29.663	-29.907	-25.757	-20.02	-15.625	48.402	0.238	1.001	0.62	0.467	0.01	0.162	0.162	0.086	0.544	0.162
48.602	-65.063	-66.04	-66.284	-66.162	-28.564	-29.785	-30.029	-25.757	-20.264	-15.869	48.602	0.162	1.23	0.467	0.62	0.315	0.162	0.162	-0.143	0.086	0.162
48.802	-64.941	-66.162	-66.284	-66.162	-28.687	-29.785	-30.029	-26.001	-20.386	-15.991	48.802	0.238	1.001	0.238	0.467	0.391	0.162	0.086	-0.372	-0.448	0.162
49.002	-64.941	-66.162	-66.284	-66.162	-28.809	-29.907	-30.151	-26.001	-20.508	-16.235	49.002	0.467	0.544	0.162	0.238	0.238	0.162	-0.143	-0.525	-0.219	0.162
49.202	-64.941	-66.162	-66.284	-66.162	-28.809	-29.907	-30.273	-26.245	-20.63	-16.357	49.202	0.62	0.315	0.162	0.238	0.162	0.162	-0.296	-0.601	0.467	0.162
49.402	-64.941	-66.162	-66.284	-66.162	-28.931	-30.029	-30.273	-26.245	-20.752	-16.602	49.402	0.467	0.544	0.162	0.544	0.086	0.162	-0.219	-0.296	0.544	0.162
49.602	-64.941	-66.162	-66.284	-66.162	-29.053	-30.151	-30.396	-26.367	-20.996	-16.724	49.602	0.315	0.925	0.162	0.925	-0.143	0.162	-0.296	0.238	0.086	0.162
49.802	-64.941	-66.162	-66.284	-66.284	-29.053	-30.151	-30.518	-26.489	-21.118	-16.968	49.802	0.544	0.925	0.162	0.925	-0.219	0.162	-0.601	0.391	-0.067	0.086
50.002	-64.941	-66.162	-66.284	-66.162	-29.175	-30.273	-30.518	-26.611	-21.362	-17.09	50.002	0.925	0.544	0.162	0.544	0.162	0.162	-0.601	0.238	0.086	-0.143
50.202	-64.941	-66.162	-66.284	-66.162	-29.419	-30.396	-30.64	-26.733	-21.484	-17.334	50.202	0.925	0.238	0.238	0.238	0.467	0.162	-0.143	0.162	0.162	-0.296
50.402	-64.941	-66.162	-66.284	-66.162	-29.419	-30.518	-30.762	-26.978	-21.606	-17.456	50.402	0.544	0.162	0.467	0.162	0.162	0.162	0.391	0.162	0.162	-0.143
50.602	-64.941	-66.162	-66.284	-66.162	-29.541	-30.518	-30.762	-26.978	-21.729	-17.578	50.602	0.238	0.162	0.696	0.086	-0.219	0.238	0.62	0.162	0.162	0.086
50.802	-64.941	-66.162	-66.284	-66.162	-29.541	-30.518	-30.762	-27.1	-21.973	-17.822	50.802	0.162	0.162	0.849	-0.143	-0.143	0.467	0.467	0.162	0.162	0.162
51.002	-64.941	-66.162	-66.284	-66.162	-29.663	-30.64	-31.006	-27.222	-22.095	-18.066	51.002	0.162	0.162	1.001	-0.296	0.086	0.62	0.238	0.162	0.162	0.162
51.202	-65.063	-66.162	-66.284	-66.04	-29.785	-30.762	-31.006	-27.344	-22.217	-18.188	51.202	0.238	0.162	0.925	-0.143	0.162	0.467	0.162	0.162	0.162	0.086
51.402	-64.941	-66.162	-66.284	-66.04	-29.907	-30.762	-31.128	-27.466	-22.339	-18.311	51.402	0.467	0.162	0.467	0.086	0.162	0.238	0.162	0.162	0.086	-0.143
51.602	-65.063	-66.162	-66.284	-66.162	-30.151	-30.884	-31.25	-27.71	-22.583	-18.433	51.602	0.62	0.162	-0.067	0.162	0.238	0.162	0.162	0.162	-0.143	-0.296
51.802	-64.941	-66.04	-66.284	-66.162	-30.151	-30.884	-31.372	-27.71	-22.705	-18.799	51.802	0.467	0.162	-0.219	0.238	0.467	0.086	0.162	0.086	-0.296	-0.067
52.002	-65.063	-66.04	-66.284	-66.162	-30.151	-31.128	-31.372	-27.832	-22.827	-18.921	52.002	0.238	0.162	0.162	0.467	0.62	-0.143	0.086	-0.143	-0.219	0.391
52.202	-65.063	-66.04	-66.284	-66.162	-30.273	-31.25	-31.494	-27.954	-22.949	-19.043	52.202	0.162	0.162	0.544	0.62	0.467	-0.296	-0.143	-0.296	-0.219	0.62
52.402	-65.063	-66.04	-66.284	-66.162	-30.396	-31.25	-31.494	-28.076	-23.071	-19.287	52.402	0.162	0.162	0.467	0.391	0.162	-0.143	-0.372	-0.219	-0.296	0.391
52.602	-65.063	-66.04	-66.284	-66.162	-30.518	-31.372	-31.616	-28.198	-23.193	-19.409	52.602	0.162	0.162	0.315	0.01	-0.143	0.086	-0.448	-0.219	-0.067	-0.143
52.802	-65.063	-66.162	-66.284	-66.162	-30.64	-31.372	-31.738	-28.32	-23.315	-19.531	52.802	0.086	0.162	0.544	0.01	-0.296	0.162	-0.372	-0.296	0.391	-0.601
53.002	-65.063	-66.04	-66.284	-66.162	-30.64	-31.494	-31.738	-28.442	-23.56	-19.653	53.002	-0.219	0.162	0.925	0.238	-0.219	0.162	-0.143	-0.219	0.62	-0.601
53.202	-65.063	-66.04	-66.284	-66.162	-30.762	-31.616	-31.86	-28.442	-23.682	-19.897	53.202	-0.601	0.162	0.925	0.01	-0.143	0.086	0.01	-0.219	0.467	-0.296
53.402	-65.063	-66.04	-66.284	-66.162	-30.762	-31.738	-31.982	-28.564	-23.804	-20.02	53.402	-0.525	0.162	0.544	-0.525	-0.067	-0.143	-0.219	-0.296	0.162	-0.219
53.602	-65.063	-65.918	-66.284	-66.284	-30.884	-31.738	-32.104	-28.687	-23.926	-20.142	53.602	0.086	0.162	0.238	-0.601	0.01	-0.372	-0.601	-0.143	-0.219	-0.372
53.802	-65.063	-66.04	-66.284	-66.162	-30.884	-31.86	-32.104	-28.931	-24.17	-20.386	53.802	0.544	0.162	0.162	-0.219	-0.143	-0.525	-0.601	0.01	-0.601	-0.525
54.002	-65.063	-66.04	-66.284	-66.284	-31.006	-31.982	-32.227	-28.931	-24.17	-20.508	54.002	0.467	0.086	0.086	0.086	-0.448	-0.677	-0.219	-0.143	-0.601	-0.677
54.202	-65.063	-66.04	-66.284	-66.284	-31.128	-31.982	-32.349	-29.053	-24.292	-20.752	54.202	0.238	-0.219	-0.143	0.162	-0.677	-0.601	0.01	-0.372	-0.219	-0.677
54.402	-65.063	-66.04	-66.162	-66.284	-31.25	-32.227	-32.471	-29.175	-24.414	-20.874	54.402	0.162	-0.677	-0.296	0.238	-0.677	-0.219	-0.143	-0.525	0.01	-0.525
54.602	-64.941	-66.04	-66.284	-66.284	-31.372	-32.227	-32.471	-29.297	-24.658	-20.996	54.602	0.162	-0.83	-0.219	0.391	-0.525	0.01	-0.372	-0.753	-0.219	-0.448
54.802	-64.941	-66.04	-66.284	-66.162	-31.372	-32.349	-32.593	-29.419	-24.78	-21.118	54.802	0.162	-0.448	-0.296	0.238	-0.448	-0.143	-0.525	-0.906	-0.601	-0.448
55.002	-65.063	-66.162	-66.284	-66.162	-31.494	-32.349	-32.715	-29.541	-24.902	-21.24	55.002	0.162	-0.067	-0.677	-0.296	-0.448	-0.296	-0.753	-0.677	-0.601	-0.448
55.202	-65.063	-66.162	-66.284	-66.162	-31.616	-32.471	-32.837	-29.541	-25.024	-21.484	55.202	0.162	0.01	-0.906	-0.525	-0.372	-0.219	-0.906	-0.296	-0.219	-0.448
55.402	-65.063	-66.162	-66.284	-66.284	-31.738	-32.471	-32.837	-29.663	-25.146	-21.606	55.402	0.086	0.238	-0.601	-0.219	-0.219	-0.296	-0.753	-0.219	0.01	-0.372
55.602	-64.941	-66.162	-66.284	-66.284	-31.86	-32.593	-32.837	-29.907	-25.269	-21.729	55.602	-0.219	0.62	0.086	0.01	-0.296	-0.601	-0.525	-0.372	-0.219	-0.143
55.802	-64.941	-66.162	-66.284	-66.284	-31.982	-32.715	-32.959	-29.907	-25.391	-21.973	55.802	-0.601	0.772	0.467	-0.143	-0.677	-0.601	-0.372	-0.525	-0.601	0.01
56.002	-64.941	-66.04	-66.284	-66.162	-31.982	-32.715	-33.081	-29.907	-25.635	-22.095	56.002	-0.677	0.62	0.086	-0.372	-0.982	-0.296	-0.219	-0.753	-0.601	-0.143
56.202	-64.941	-66.04	-66.284	-66.284	-32.104	-32.715	-33.203	-30.151	-25.757	-22.217	56.202	-0.601	0.162	-0.601	-0.448	-1.059	-0.296	-0.219	-0.906	-0.296	-0.296
56.402	-64.941	-66.162	-66.284	-66.162	-32.227	-32.959	-33.203	-30.151	-25.879	-22.339	56.402	-0.753	-0.219	-0.906	-0.448	-1.059	-0.677	-0.296	-0.677	-0.296	-0.143
56.602	-64.941	-66.162	-66.284	-66.162	-32.227	-33.081	-33.325	-30.273	-26.001	-22.461	56.602	-0.982	-0.219	-0.753	-0.448	-1.059	-0.906	-0.219	-0.296	-0.601	0.01
56.802	-64.941	-66.162	-66.284	-66.162	-32.471	-33.081	-33.447	-30.396	-26.123	-22.705	56.802	-0.982	-0.296	-0.525	-0.448	-0.982	-0.753	-0.219	-0.219	-0.601	-0.143
57.002	-64.941	-66.162	-66.284	-66.162	-32.471	-33.081	-33.569	-30.396	-26.245	-22.705	57.002	-0.677	-0.601	-0.372	-0.448	-0.677	-0.525	-0.296	-0.296	-0.219	-0.372
57.202	-64.941	-66.162	-66.284	-66.162	-32.593	-33.203	-33.569	-30.518	-26.367	-22.949	57.202	-0.296	-0.525	-0.143	-0.372	-0.296	-0.372	-0.143	-0.143	0.01	-0.448
57.402	-64.941	-66.04	-66.284	-66.162	-32.715	-33.325	-33.691	-30.64	-26.489	-23.071	57.402	-0.296	0.086	0.086	-0.143	-0.219	-0.143	0.086	0.01	-0.143	-0.448
57.602	-64.941	-66.04	-66.284	-66.162	-32.837	-33.325	-33.691	-30.64	-26.733	-23.193	57.602	-0.601	0.544	0.162	0.01	-0.372	0.086	0.086	-0.143	-0.296	-0.448
57.802	-64.941	-66.04	-66.406	-66.162	-32.837	-33.447	-33.691	-30.762	-26.855	-23.315	57.802	-0.601	0.391	0.162	-0.143	-0.448	0.086	-0.219	-0.448	-0.219	-0.372
58.002	-64.941	-66.162	-66.284	-66.162	-32.959	-33.447	-33.813	-30.884	-26.855	-23.438	58.002	-0.219	-0.143	0.162	-0.219	-0.372	-0.143	-0.601	-0.753	-0.296	-0.143
58.202	-65.063	-66.04	-66.284	-66.162	-33.081	-33.569	-33.813	-31.006	-27.1	-23.682	58.202	0.01	-0.601	0.162	0.162	-0.143	-0.296	-0.677	-0.83	-0.601	0.086
58.402	-65.063	-66.162	-66.284	-66.162	-33.203	-33.569	-34.058	-31.128	-27.222	-23.804	58.402	-0.143	-0.601	0.086	0.544	0.01	-0.143	-0.601	-0.448	-0.601	0.086
58.602	-64.941	-66.162	-66.406	-66.162	-33.203	-33.691	-34.18	-31.25	-27.344	-23.926	58.602	-0.296	-0.219	-0.143	0.391	-0.143	0.01	-0.677	0.01	-0.296	-0.219
58.802	-64.941	-66.162	-66.284	-66.162	-33.325	-33.813	-34.302	-31.25	-27.466	-24.048	58.802	-0.143	0.086	-0.296	-0.067	-0.296	-0.143	-0.525	0.162	-0.296	-0.677
59.002	-64.941	-66.04	-66.284	-66.162	-33.447	-33.936	-34.302	-31.372	-27.466	-24.17	59.002	0.01	0.162	-0.143	-0.296	-0.143	-0.296	0.01	0.086	-0.601	-0.906
59.202	-65.063	-66.04	-66.284	-66.162	-33.569	-33.936	-34.424	-31.494	-27.71	-24.292	59.202	-0.143	0.162	0.01	-0.143	0.086	-0.143	0.162	-0.219	-0.601	-0.677
59.402	-65.063	-66.04	-66.284	-66.162	-33.569	-34.058	-34.546	-31.616	-27.832	-24.292	59.402	-0.296	0.086	-0.143	0.086	0.162	0.086	-0.372	-0.601	-0.219	-0.219
59.602	-65.063	-66.04	-66.284	-66.162	-33.691	-34.18	-34.668	-31.738	-27.832	-24.536	59.602	-0.219	-0.219	-0.296	0.162	0.162	0.086	-0.83	-0.601	0.086	0.01
59.802	-64.941	-66.04	-66.284	-66.162	-33.691	-34.302	-34.668	-31.738	-27.954	-24.658	59.802	-0.219	-0.601	-0.067	0.162	0.086	-0.219	-0.677	-0.219	0.162	-0.143
60.002	-65.063	-66.04	-66.162	-66.162	-33.813	-34.302	-34.79	-31.86	-28.076	-24.78	60.002	-0.296	-0.601	0.391	0.086	-0.219	-0.601	-0.296	0.01	0.086	-0.296
60.202	-64.941	-66.04	-66.162	-66.162	-33.936	-34.424	-34.79	-31.982	-28.198	-24.902	60.202	-0.143	-0.219	0.62	-0.143	-0.677	-0.601	-0.296	-0.219	-0.143	-0.219
60.402	-64.941	-66.04	-66.162	-66.284	-33.936	-34.546	-34.912	-32.104	-28.32	-25.024	60.402	0.086	0.086	0.391	-0.296	-0.906	-0.296	-0.601	-0.601	-0.296	-0.296
60.602	-64.941	-66.04	-66.284	-66.284	-34.058	-34.668	-35.034	-32.227	-28.442	-25.269	60.602	0.086	0.162	-0.143	-0.143	-0.753	-0.296	-0.677	-0.677	-0.219	-0.601
60.802	-64.941	-66.04	-66.162	-66.284	-34.18	-34.79	-35.034	-32.227	-28.564	-25.269	60.802	-0.219	0.162	-0.601	0.086	-0.601	-0.601	-0.601	-0.525	-0.296	-0.601
61.002	-64.941	-66.04	-66.284	-66.284	-34.302	-34.79	-35.156	-32.349	-28.687	-25.513	61.002	-0.601	0.238	-0.601	0.086	-0.753	-0.601	-0.753	-0.448	-0.601	-0.219
61.202	-64.941	-66.04	-66.284	-66.284	-34.302	-34.912	-35.278	-32.471	-28.809	-25.635	61.202	-0.601	0.467	-0.219	-0.143	-0.906	-0.219	-0.906	-0.525	-0.677	0.086
61.402	-64.941	-66.04	-66.284	-66.162	-34.424	-34.912	-35.278	-32.593	-28.931	-25.757	61.402	-0.219	0.544	0.086	-0.296	-0.753	0.086	-0.677	-0.677	-0.448	0.086
61.602	-64.941	-66.04	-66.162	-66.284	-34.668	-35.034	-35.4	-32.715	-29.053	-25.879	61.602	0.086	0.086	0.162	-0.219	-0.601	0.086	-0.219	-0.525	-0.067	-0.219
61.802	-64.941	-66.04	-66.284	-66.284	-34.668	-35.156	-35.4	-32.715	-29.175	-26.001	61.802	0.086	-0.525	0.086	-0.296	-0.677	-0.143	0.086	0.086	0.238	-0.677
62.002	-64.941	-66.04	-66.162	-66.284	-34.668	-35.278	-35.522	-32.837	-29.297	-26.123	62.002	-0.143	-0.677	-0.143	-0.601	-0.677	-0.296	0.162	0.544	0.086	-0.982
62.202	-64.941	-66.04	-66.162	-66.284	-34.79	-35.278	-35.645	-32.959	-29.419	-26.245	62.202	-0.296	-0.601	-0.372	-0.601	-0.525	-0.143	0.238	0.467	-0.296	-1.059
62.402	-64.941	-66.04	-66.162	-66.284	-34.912	-35.278	-35.645	-33.081	-29.541	-26.367	62.402	-0.219	-0.753	-0.448	-0.219	-0.372	0.086	0.467	0.238	-0.448	-0.982
62.603	-64.941	-66.04	-66.284	-66.284	-34.912	-35.4	-35.767	-33.081	-29.663	-26.611	62.603	-0.219	-0.906	-0.372	0.01	-0.143	0.238	0.62	0.162	-0.448	-0.677
62.803	-64.941	-66.04	-66.162	-66.284	-35.034	-35.4	-35.889	-33.325	-29.785	-26.733	62.803	-0.296	-0.677	-0.219	-0.143	0.086	0.467	0.391	0.162	-0.448	-0.219
63.003	-64.941	-66.04	-66.284	-66.162	-35.034	-35.522	-36.011	-33.325	-29.907	-26.855	63.003	-0.143	-0.219	-0.296	-0.219	0.162	0.62	-0.067	0.162	-0.372	0.086
63.203	-64.941	-66.04	-66.284	-66.162	-35.278	-35.645	-36.011	-33.325	-30.029	-26.978	63.203	0.086	0.086	-0.601	0.162	0.162	0.467	-0.296	0.162	-0.143	0.162
63.403	-64.941	-66.04	-66.284	-66.162	-35.278	-35.645	-36.011	-33.447	-30.151	-27.1	63.403	0.162	0.238	-0.601	0.467	0.162	0.238	-0.143	0.238	0.086	0.162
63.603	-64.941	-66.04	-66.284	-66.162	-35.4	-35.767	-36.133	-33.447	-30.273	-27.222	63.603	0.162	0.544	-0.296	0.162	0.162	0.162	0.01	0.467	0.238	0.162
63.803	-64.941	-66.04	-66.284	-66.162	-35.522	-35.889	-36.255	-33.691	-30.396	-27.344	63.803	0.162	0.925	-0.219	-0.143	0.162	0.238	-0.143	0.544	0.467	0.162
64.003	-64.941	-66.04	-66.284	-66.162	-35.645	-35.889	-36.377	-33.691	-30.396	-27.466	64.003	0.162	0.849	-0.296	0.238	0.162	0.391	-0.296	0.162	0.696	0.162
64.203	-64.941	-66.04	-66.284	-66.162	-35.767	-36.011	-36.377	-33.813	-30.518	-27.588	64.203	0.162	0.238	-0.143	0.849	0.162	0.315	-0.067	-0.219	0.772	0.162
64.403	-64.941	-66.04	-66.284	-66.162	-35.767	-36.133	-36.499	-33.936	-30.64	-27.71	64.403	0.162	-0.219	0.086	0.925	0.162	0.01	0.391	-0.143	0.772	0.238
64.603	-64.819	-66.04	-66.284	-66.162	-35.889	-36.133	-36.499	-34.058	-30.762	-27.832	64.603	0.238	-0.143	0.162	0.544	0.162	-0.067	0.62	0.086	0.772	0.467
64.803	-64.941	-66.04	-66.284	-66.162	-36.011	-36.255	-36.621	-34.18	-30.884	-28.076	64.803	0.544	0.086	0.162	0.238	0.162	0.086	0.467	0.238	0.696	0.62
65.003	-64.941	-66.04	-66.284	-66.162	-36.133	-36.377	-36.743	-34.302	-31.006	-28.198	65.003	0.925	0.162	0.162	0.238	0.238	0.238	0.238	0.544	0.467	0.467
65.203	-64.941	-66.04	-66.284	-66.162	-36.133	-36.377	-36.743	-34.302	-31.128	-28.32	65.203	0.925	0.162	0.162	0.544	0.467	0.467	0.162	0.925	0.238	0.238
65.403	-64.941	-66.04	-66.284	-66.162	-36.255	-36.499	-36.865	-34.424	-31.128	-28.32	65.403	0.544	0.162	0.086	1.001	0.696	0.696	0.162	0.925	0.086	0.162
65.603	-64.941	-66.04	-66.284	-66.162	-36.377	-36.621	-36.987	-34.546	-31.372	-28.564	65.603	0.315	0.162	-0.143	1.23	0.849	0.849	0.162	0.544	-0.143	0.162
65.803	-64.819	-66.04	-66.284	-66.162	-36.499	-36.621	-37.109	-34.668	-31.372	-28.687	65.803	0.467	0.162	-0.296	1.078	1.078	0.925	0.162	0.238	-0.296	0.162
66.003	-64.941	-66.04	-66.284	-66.162	-36.499	-36.743	-37.109	-34.79	-31.494	-28.687	66.003	0.62	0.238	0.01	0.849	1.154	0.62	0.162	0.162	-0.143	0.162
66.203	-64.941	-66.04	-66.284	-66.162	-36.621	-36.865	-37.231	-34.912	-31.616	-28.809	66.203	0.467	0.544	0.772	0.696	0.696	0.162	0.162	0.162	0.086	0.238
66.403	-64.941	-66.04	-66.162	-66.162	-36.621	-36.987	-37.354	-35.034	-31.738	-29.053	66.403	0.238	1.001	1.383	0.467	0.086	0.238	0.162	0.162	0.162	0.467
66.603	-64.941	-66.04	-66.284	-66.284	-36.743	-37.109	-37.476	-35.034	-31.86	-29.175	66.603	0.162	1.154	1.23	0.315	0.01	0.544	0.162	0.162	0.162	0.62
66.803	-64.941	-66.04	-66.284	-66.284	-36.865	-37.109	-37.476	-35.156	-31.982	-29.297	66.803	0.162	0.696	0.62	0.467	0.391	0.467	0.162	0.162	0.162	0.544
67.003	-64.941	-66.04	-66.284	-66.284	-36.865	-37.231	-37.598	-35.278	-32.104	-29.419	67.003	0.162	0.162	0.238	0.696	0.62	0.238	0.162	0.162	0.162	0.544
67.203	-64.941	-66.04	-66.162	-66.284	-36.987	-37.354	-37.598	-35.4	-32.227	-29.541	67.203	0.162	0.238	0.162	0.772	0.467	0.162	0.162	0.162	0.162	0.62
67.403	-64.941	-66.04	-66.162	-66.284	-37.109	-37.354	-37.72	-35.522	-32.227	-29.663	67.403	0.162	0.544	0.238	0.696	0.238	0.238	0.086	0.086	0.238	0.391
67.603	-64.941	-66.04	-66.162	-66.406	-37.231	-37.476	-37.72	-35.645	-32.349	-29.785	67.603	0.162	0.467	0.544	0.544	0.162	0.467	-0.143	-0.143	0.467	-0.067
67.803	-64.941	-66.04	-66.162	-66.284	-37.231	-37.598	-37.964	-35.767	-32.471	-29.907	67.803	0.162	0.315	1.001	0.62	0.162	0.62	-0.296	-0.219	0.62	-0.296
68.003	-64.941	-66.04	-66.162	-66.284	-37.354	-37.72	-38.086	-35.767	-32.593	-30.029	68.003	0.162	0.544	1.23	0.925	0.162	0.467	-0.143	0.162	0.467	-0.067
68.203	-64.941	-66.04	-66.162	-66.284	-37.476	-37.72	-38.086	-35.889	-32.715	-30.029	68.203	0.238	0.925	0.925	0.925	0.162	0.315	0.086	0.544	0.238	0.391
68.403	-64.941	-66.162	-66.162	-66.284	-37.598	-37.842	-38.086	-36.011	-32.959	-30.273	68.403	0.467	0.849	0.238	0.62	0.162	0.467	0.162	0.467	0.238	0.696
68.603	-64.941	-66.04	-66.284	-66.284	-37.598	-37.842	-38.208	-36.133	-33.081	-30.396	68.603	0.544	0.238	-0.219	0.62	0.162	0.62	0.238	0.315	0.467	0.772
68.803	-64.941	-66.04	-66.284	-66.284	-37.72	-37.964	-38.33	-36.133	-33.081	-30.396	68.803	0.162	-0.219	-0.143	0.925	0.162	0.467	0.391	0.467	0.62	0.696
69.003	-64.941	-66.04	-66.284	-66.284	-37.72	-38.086	-38.33	-36.255	-33.203	-30.64	69.003	-0.143	-0.143	0.086	0.925	0.162	0.315	0.315	0.62	0.544	0.391
69.203	-64.941	-66.162	-66.162	-66.284	-37.842	-38.086	-38.452	-36.377	-33.447	-30.762	69.203	0.238	0.086	0.162	0.544	0.238	0.467	0.01	0.391	0.544	-0.067
69.403	-64.941	-66.04	-66.284	-66.284	-37.964	-38.208	-38.574	-36.377	-33.569	-30.762	69.403	0.849	0.162	0.162	0.238	0.467	0.62	0.01	-0.067	0.62	-0.296
69.603	-64.941	-66.04	-66.284	-66.162	-38.086	-38.208	-38.574	-36.499	-33.691	-30.884	69.603	0.925	0.238	0.162	0.162	0.62	0.467	0.391	-0.296	0.467	-0.067
69.803	-64.941	-66.162	-66.284	-66.162	-38.086	-38.33	-38.696	-36.621	-33.691	-31.128	69.803	0.544	0.467	0.238	0.162	0.467	0.238	0.62	-0.143	0.238	0.315
70.003	-64.941	-66.04	-66.284	-66.284	-38.208	-38.33	-38.818	-36.743	-33.813	-31.128	70.003	0.162	0.544	0.467	0.238	0.315	0.162	0.391	0.086	0.238	0.315
70.203	-64.941	-66.04	-66.284	-66.162	-38.33	-38.452	-38.94	-36.865	-33.936	-31.25	70.203	-0.143	0.162	0.62	0.544	0.467	0.086	-0.067	0.162	0.467	0.01
70.403	-64.941	-66.04	-66.284	-66.284	-38.452	-38.574	-38.94	-36.865	-34.058	-31.372	70.403	-0.219	-0.219	0.467	0.925	0.544	-0.143	-0.296	0.162	0.62	-0.067
70.603	-64.941	-66.04	-66.284	-66.284	-38.452	-38.574	-39.062	-36.987	-34.058	-31.494	70.603	0.162	-0.143	0.238	0.925	0.162	-0.296	-0.143	0.238	0.467	0.086
70.803	-64.941	-66.04	-66.284	-66.284	-38.452	-38.696	-39.062	-37.109	-34.18	-31.616	70.803	0.544	0.086	0.162	0.544	-0.143	-0.143	0.086	0.467	0.238	0.162
71.003	-64.941	-66.04	-66.284	-66.162	-38.696	-38.818	-39.185	-37.231	-34.302	-31.738	71.003	0.467	0.162	0.162	0.238	0.238	0.086	0.162	0.62	0.162	0.162
71.203	-64.941	-66.04	-66.406	-66.162	-38.696	-38.818	-39.307	-37.231	-34.424	-31.86	71.203	0.238	0.162	0.238	0.238	0.849	0.162	0.162	0.467	0.162	0.162
71.403	-64.941	-66.04	-66.284	-66.284	-38.818	-38.94	-39.429	-37.354	-34.546	-31.982	71.403	0.162	0.162	0.467	0.467	0.925	0.162	0.162	0.162	0.086	0.162
71.603	-64.941	-66.04	-66.284	-66.284	-38.94	-39.062	-39.429	-37.476	-34.546	-32.104	71.603	0.162	0.162	0.62	0.62	0.544	0.238	0.162	-0.219	-0.143	0.162
71.803	-64.941	-66.04	-66.284	-66.284	-39.062	-39.062	-39.551	-37.598	-34.668	-32.227	71.803	0.162	0.162	0.467	0.467	0.238	0.467	0.162	-0.601	-0.372	0.162
72.003	-64.941	-66.04	-66.284	-66.284	-39.062	-39.062	-39.551	-37.72	-34.79	-32.227	72.003	0.162	0.162	0.238	0.238	0.162	0.62	0.086	-0.525	-0.448	0.086
72.203	-64.941	-66.04	-66.284	-66.284	-39.185	-39.185	-39.673	-37.842	-34.912	-32.349	72.203	0.162	0.162	0.162	0.162	0.162	0.467	-0.143	0.086	-0.372	-0.143
72.403	-64.941	-65.918	-66.284	-66.284	-39.185	-39.307	-39.795	-37.842	-35.034	-32.471	72.403	0.162	0.162	0.162	0.238	0.086	0.238	-0.219	0.467	-0.143	-0.372
72.603	-64.941	-65.918	-66.284	-66.284	-39.429	-39.429	-39.795	-37.964	-35.156	-32.715	72.603	0.162	0.162	0.238	0.467	-0.143	0.162	0.086	0.086	0.086	-0.448
72.803	-64.941	-65.918	-66.162	-66.284	-39.429	-39.429	-39.917	-38.086	-35.278	-32.715	72.803	0.162	0.162	0.544	0.544	-0.296	0.162	0.238	-0.525	0.162	-0.372
73.003	-64.941	-66.04	-66.284	-66.284	-39.551	-39.551	-39.917	-38.086	-35.4	-32.837	73.003	0.162	0.162	1.001	0.162	-0.219	0.162	0.01	-0.601	0.086	-0.143
73.203	-64.941	-66.04	-66.284	-66.284	-39.673	-39.673	-40.039	-38.208	-35.4	-32.959	73.203	0.162	0.162	1.23	-0.219	-0.219	0.162	-0.143	-0.296	-0.219	0.086
73.403	-64.941	-66.04	-66.162	-66.406	-39.673	-39.673	-40.161	-38.33	-35.645	-33.081	73.403	0.162	0.162	1.001	-0.143	-0.372	0.086	-0.296	-0.296	-0.601	0.162
73.603	-65.063	-66.04	-66.284	-66.284	-39.795	-39.917	-40.283	-38.452	-35.767	-33.203	73.603	0.162	0.086	0.544	0.01	-0.448	-0.219	-0.601	-0.601	-0.677	0.162
73.803	-64.941	-66.04	-66.284	-66.284	-39.795	-39.917	-40.283	-38.452	-35.889	-33.325	73.803	0.162	-0.143	0.315	-0.143	-0.372	-0.601	-0.677	-0.601	-0.601	0.162
74.003	-64.941	-66.04	-66.284	-66.284	-39.917	-40.039	-40.405	-38.574	-35.889	-33.325	74.003	0.162	-0.219	0.467	-0.296	-0.143	-0.601	-0.601	-0.219	-0.753	0.086
74.203	-65.063	-66.04	-66.284	-66.284	-40.039	-40.039	-40.527	-38.696	-36.011	-33.569	74.203	0.162	0.162	0.544	-0.143	0.086	-0.219	-0.753	0.01	-0.906	-0.219
74.403	-64.941	-66.04	-66.284	-66.284	-40.161	-40.161	-40.649	-38.818	-36.133	-33.569	74.403	0.162	0.544	0.162	0.086	0.162	0.086	-1.059	-0.219	-0.753	-0.601
74.603	-64.941	-65.918	-66.284	-66.284	-40.161	-40.161	-40.649	-38.94	-36.255	-33.813	74.603	0.162	0.391	-0.219	0.162	0.086	0.086	-1.287	-0.677	-0.525	-0.677
74.803	-65.063	-66.04	-66.284	-66.284	-40.283	-40.283	-40.771	-38.94	-36.377	-33.813	74.803	0.086	-0.067	-0.143	0.162	-0.219	-0.143	-1.135	-0.982	-0.448	-0.525
75.003	-64.941	-66.04	-66.284	-66.284	-40.405	-40.405	-40.894	-39.062	-36.621	-33.936	75.003	-0.219	-0.296	0.086	0.086	-0.677	-0.296	-0.601	-0.982	-0.448	-0.372
75.203	-65.063	-66.04	-66.162	-66.284	-40.405	-40.527	-40.894	-39.185	-36.499	-34.058	75.203	-0.601	-0.143	0.162	-0.143	-0.906	-0.219	-0.372	-0.677	-0.372	-0.143
75.403	-64.941	-66.04	-66.284	-66.284	-40.527	-40.527	-41.016	-39.185	-36.621	-34.18	75.403	-0.601	0.086	0.162	-0.372	-0.677	-0.296	-0.601	-0.219	-0.143	0.086
75.603	-64.941	-66.04	-66.284	-66.284	-40.527	-40.649	-41.016	-39.307	-36.865	-34.302	75.603	-0.219	0.086	0.238	-0.448	-0.296	-0.677	-0.601	0.086	0.01	0.162
75.803	-64.941	-66.04	-66.284	-66.284	-40.771	-40.771	-41.138	-39.307	-36.865	-34.302	75.803	0.01	-0.143	0.391	-0.448	-0.296	-0.906	-0.219	0.086	-0.219	0.162
76.003	-64.941	-65.918	-66.284	-66.284	-40.771	-40.771	-41.26	-39.429	-36.987	-34.546	76.003	-0.219	-0.296	0.238	-0.448	-0.601	-0.677	0.01	-0.219	-0.601	0.086
76.203	-64.941	-66.04	-66.284	-66.284	-40.894	-40.894	-41.382	-39.551	-37.109	-34.546	76.203	-0.677	-0.219	-0.372	-0.448	-0.601	-0.296	-0.143	-0.677	-0.601	-0.219
76.403	-65.063	-65.918	-66.284	-66.284	-40.894	-40.894	-41.382	-39.673	-37.109	-34.79	76.403	-0.982	-0.296	-0.83	-0.448	-0.296	-0.296	-0.296	-0.906	-0.219	-0.601
76.603	-65.063	-66.04	-66.284	-66.284	-41.016	-41.016	-41.504	-39.795	-37.354	-34.79	76.603	-0.982	-0.601	-0.677	-0.372	-0.296	-0.677	-0.219	-0.677	0.01	-0.601
76.803	-64.941	-66.04	-66.284	-66.284	-41.138	-41.016	-41.504	-39.795	-37.354	-34.912	76.803	-0.677	-0.601	-0.219	-0.219	-0.601	-0.906	-0.296	-0.219	-0.143	-0.296
77.003	-64.941	-65.918	-66.284	-66.284	-41.138	-41.138	-41.626	-39.917	-37.476	-35.034	77.003	-0.219	-0.219	0.086	-0.296	-0.601	-0.677	-0.601	0.01	-0.296	-0.296
77.203	-64.941	-65.918	-66.284	-66.284	-41.26	-41.138	-41.748	-40.039	-37.476	-35.156	77.203	0.086	0.086	0.086	-0.601	-0.219	-0.296	-0.601	-0.067	-0.143	-0.601
77.403	-65.063	-65.918	-66.284	-66.284	-41.382	-41.382	-41.748	-40.161	-37.72	-35.278	77.403	0.162	0.086	-0.143	-0.601	0.01	-0.219	-0.219	0.01	0.01	-0.601
77.603	-64.941	-66.04	-66.284	-66.284	-41.504	-41.382	-41.87	-40.161	-37.72	-35.4	77.603	0.162	-0.143	-0.372	-0.296	-0.219	-0.296	0.086	0.315	-0.143	-0.296
77.803	-64.941	-66.04	-66.284	-66.284	-41.626	-41.504	-41.992	-40.283	-37.842	-35.4	77.803	0.162	-0.372	-0.525	-0.296	-0.601	-0.143	0.086	0.315	-0.296	-0.296
78.003	-64.941	-66.04	-66.284	-66.284	-41.626	-41.504	-41.992	-40.283	-37.964	-35.522	78.003	0.086	-0.448	-0.677	-0.601	-0.601	0.01	-0.143	-0.067	-0.143	-0.677
78.203	-64.941	-66.04	-66.284	-66.284	-41.748	-41.626	-42.114	-40.405	-37.964	-35.645	78.203	-0.219	-0.448	-0.601	-0.601	-0.219	-0.219	-0.372	-0.372	0.086	-0.982
78.403	-64.941	-65.918	-66.284	-66.284	-41.87	-41.748	-42.236	-40.527	-38.086	-35.767	78.403	-0.601	-0.448	-0.143	-0.296	0.01	-0.601	-0.525	-0.448	0.162	-0.982
78.603	-64.941	-66.04	-66.284	-66.284	-41.87	-41.748	-42.236	-40.649	-38.208	-35.889	78.603	-0.601	-0.372	0.315	-0.296	-0.143	-0.601	-0.753	-0.448	0.162	-0.677
78.803	-64.941	-66.04	-66.162	-66.284	-41.992	-41.87	-42.358	-40.771	-38.33	-36.011	78.803	-0.296	-0.143	0.315	-0.677	-0.296	-0.296	-0.906	-0.525	0.162	-0.219
79.003	-64.941	-66.04	-66.284	-66.284	-42.114	-41.87	-42.358	-40.894	-38.452	-36.133	79.003	-0.219	0.086	0.01	-0.906	-0.143	-0.219	-0.677	-0.677	0.162	0.01
79.203	-64.941	-66.04	-66.162	-66.284	-42.114	-41.992	-42.48	-40.894	-38.574	-36.255	79.203	-0.372	0.162	-0.067	-0.677	0.086	-0.296	-0.219	-0.677	0.162	-0.219
79.403	-64.941	-66.04	-66.162	-66.284	-42.236	-42.114	-42.48	-41.016	-38.696	-36.255	79.403	-0.525	0.162	0.01	-0.219	0.162	-0.143	0.01	-0.525	0.086	-0.601
79.603	-65.063	-66.04	-66.162	-66.284	-42.358	-42.114	-42.603	-41.138	-38.696	-36.377	79.603	-0.677	0.162	-0.219	0.01	0.086	0.086	-0.143	-0.448	-0.143	-0.677
79.803	-65.063	-66.04	-66.162	-66.406	-42.236	-42.236	-42.725	-41.26	-38.818	-36.499	79.803	-0.601	0.162	-0.601	-0.143	-0.143	0.086	-0.296	-0.448	-0.296	-0.601
80.003	-65.063	-66.04	-66.284	-66.284	-42.48	-42.358	-42.847	-41.382	-38.94	-36.621	80.003	-0.219	0.162	-0.601	-0.296	-0.296	-0.143	-0.143	-0.372	-0.143	-0.677
80.203	-65.063	-66.04	-66.284	-66.406	-42.48	-42.358	-42.847	-41.504	-39.062	-36.743	80.203	0.086	0.162	-0.219	-0.219	-0.143	-0.372	0.01	-0.143	0.086	-0.601
80.403	-65.063	-66.04	-66.162	-66.284	-42.603	-42.48	-42.969	-41.504	-39.185	-36.865	80.403	0.162	0.086	0.086	-0.296	0.086	-0.448	-0.143	0.086	0.086	-0.219
80.603	-65.063	-66.04	-66.162	-66.406	-42.725	-42.603	-43.091	-41.626	-39.307	-36.987	80.603	0.162	-0.219	0.162	-0.677	0.162	-0.372	-0.296	0.162	-0.143	0.086
80.803	-65.063	-66.04	-66.284	-66.284	-42.725	-42.603	-43.091	-41.748	-39.307	-36.987	80.803	0.086	-0.601	0.238	-0.906	0.162	-0.219	-0.067	0.162	-0.296	0.162
81.003	-64.941	-66.04	-66.284	-66.406	-42.847	-42.725	-43.091	-41.748	-39.429	-37.231	81.003	-0.143	-0.601	0.467	-0.677	0.162	-0.296	0.391	0.162	-0.219	0.162
81.203	-64.941	-65.918	-66.162	-66.406	-42.847	-42.847	-43.213	-41.87	-39.429	-37.231	81.203	-0.296	-0.219	0.544	-0.219	0.162	-0.601	0.544	0.162	-0.219	0.162
81.403	-65.063	-65.918	-66.284	-66.284	-43.091	-42.847	-43.335	-41.992	-39.673	-37.354	81.403	-0.143	0.086	0.162	0.01	0.162	-0.601	0.086	0.162	-0.219	0.162
81.603	-64.941	-66.04	-66.284	-66.284	-43.091	-42.847	-43.457	-42.114	-39.795	-37.476	81.603	0.086	0.086	-0.219	-0.143	0.086	-0.219	-0.525	0.162	0.162	0.162
81.803	-64.941	-65.918	-66.284	-66.284	-43.213	-42.969	-43.457	-42.114	-39.795	-37.476	81.803	0.086	-0.219	-0.143	-0.296	-0.143	0.01	-0.525	0.162	0.544	0.238
82.003	-64.941	-66.04	-66.284	-66.284	-43.335	-42.969	-43.579	-42.236	-40.039	-37.72	82.003	-0.143	-0.601	0.01	-0.219	-0.296	-0.219	0.086	0.086	0.467	0.467
82.203	-64.941	-66.04	-66.284	-66.406	-43.457	-43.213	-43.701	-42.358	-40.039	-37.72	82.203	-0.296	-0.601	-0.143	-0.219	-0.143	-0.525	0.467	-0.143	0.238	0.62
82.403	-64.941	-66.04	-66.284	-66.284	-43.457	-43.213	-43.701	-42.358	-40.161	-37.842	82.403	-0.143	-0.219	-0.296	-0.296	0.086	-0.296	0.162	-0.219	0.162	0.467
82.603	-64.941	-66.04	-66.284	-66.284	-43.579	-43.335	-43.823	-42.48	-40.161	-37.964	82.603	0.086	0.086	-0.143	-0.143	0.086	0.162	-0.143	0.238	0.162	0.238
82.803	-64.941	-65.918	-66.284	-66.406	-43.701	-43.335	-43.823	-42.603	-40.283	-38.086	82.803	0.086	0.238	0.086	0.086	-0.067	0.086	0.162	0.772	0.162	0.238
83.003	-64.941	-66.04	-66.284	-66.284	-43.701	-43.457	-43.945	-42.725	-40.405	-38.208	83.003	-0.143	0.467	0.162	0.162	-0.067	-0.219	0.544	0.62	0.162	0.467
83.203	-64.941	-66.04	-66.284	-66.284	-43.823	-43.457	-44.067	-42.847	-40.527	-38.208	83.203	-0.296	0.62	0.162	0.162	0.086	-0.143	0.544	0.086	0.162	0.62
83.403	-64.941	-65.918	-66.284	-66.284	-43.823	-43.579	-44.067	-42.969	-40.649	-38.452	83.403	-0.143	0.467	0.162	0.238	0.238	0.086	0.544	-0.067	0.162	0.544
83.603	-64.941	-65.918	-66.284	-66.406	-43.945	-43.701	-44.189	-42.969	-40.649	-38.452	83.603	0.086	0.238	0.162	0.544	0.315	0.162	0.62	0.086	0.086	0.544
83.803	-64.941	-65.918	-66.284	-66.284	-43.945	-43.701	-44.312	-42.969	-40.771	-38.452	83.803	0.162	0.162	0.162	1.001	0.086	0.238	0.467	0.162	-0.143	0.62
84.003	-64.941	-66.04	-66.284	-66.406	-44.189	-43.823	-44.312	-43.091	-40.894	-38.574	84.003	0.086	0.162	0.162	1.23	-0.219	0.544	0.238	0.162	-0.219	0.544
84.203	-64.941	-66.04	-66.284	-66.406	-44.189	-43.945	-44.434	-43.213	-40.894	-38.818	84.203	-0.067	0.162	0.162	1.001	-0.067	1.001	0.162	0.162	0.238	0.544
84.403	-64.941	-66.04	-66.284	-66.284	-44.312	-43.945	-44.434	-43.335	-41.138	-38.818	84.403	0.01	0.162	0.162	0.544	0.391	1.23	0.238	0.162	0.849	0.62
84.603	-64.941	-65.918	-66.284	-66.406	-44.312	-44.067	-44.556	-43.335	-41.138	-38.94	84.603	0.315	0.238	0.086	0.238	0.544	1.001	0.544	0.238	1.001	0.467
84.803	-64.941	-65.918	-66.162	-66.284	-44.434	-44.189	-44.678	-43.457	-41.26	-39.062	84.803	0.391	0.467	-0.143	0.162	0.162	0.62	0.925	0.467	0.849	0.315
85.003	-64.941	-66.04	-66.284	-66.406	-44.434	-44.189	-44.678	-43.579	-41.382	-39.185	85.003	0.238	0.62	-0.296	0.162	-0.219	0.62	0.925	0.62	0.696	0.467
85.203	-64.941	-66.04	-66.284	-66.406	-44.556	-44.189	-44.8	-43.701	-41.504	-39.307	85.203	0.086	0.467	-0.143	0.238	-0.143	0.925	0.544	0.467	0.467	0.62
85.403	-64.941	-65.918	-66.284	-66.284	-44.678	-44.312	-44.8	-43.823	-41.504	-39.429	85.403	-0.143	0.238	0.086	0.544	0.086	0.925	0.238	0.238	0.238	0.467
85.603	-64.941	-65.918	-66.162	-66.406	-44.678	-44.434	-44.922	-43.823	-41.626	-39.429	85.603	-0.219	0.238	0.162	0.925	0.238	0.544	0.162	0.162	0.162	0.238
85.803	-64.941	-66.04	-66.162	-66.284	-44.8	-44.434	-45.044	-43.945	-41.748	-39.673	85.803	0.162	0.544	0.162	0.925	0.467	0.238	0.162	0.162	0.162	0.162
86.003	-64.941	-65.918	-66.162	-66.406	-44.8	-44.556	-45.044	-43.945	-41.87	-39.673	86.003	0.544	0.925	0.162	0.62	0.62	0.162	0.162	0.162	0.238	0.086
86.203	-65.063	-65.918	-66.162	-66.284	-45.044	-44.678	-45.166	-44.067	-41.87	-39.795	86.203	0.467	1.001	0.162	0.62	0.467	0.162	0.162	0.162	0.391	-0.143
86.403	-64.941	-65.918	-66.284	-66.406	-45.044	-44.678	-45.288	-44.189	-41.992	-39.917	86.403	0.238	0.925	0.162	0.925	0.238	0.238	0.162	0.162	0.315	-0.296
86.603	-65.063	-65.918	-66.284	-66.406	-45.166	-44.8	-45.41	-44.312	-42.114	-40.039	86.603	0.238	1.001	0.162	0.925	0.162	0.467	0.086	0.162	0.01	-0.143
86.803	-64.941	-65.918	-66.284	-66.284	-45.288	-44.8	-45.41	-44.312	-42.236	-40.161	86.803	0.467	0.925	0.162	0.544	0.162	0.696	-0.143	0.162	-0.067	0.086
87.003	-64.941	-66.04	-66.284	-66.406	-45.288	-44.922	-45.532	-44.434	-42.358	-40.161	87.003	0.62	0.544	0.162	0.315	0.162	0.772	-0.296	0.238	0.086	0.238
87.203	-64.941	-66.04	-66.284	-66.406	-45.288	-45.044	-45.532	-44.556	-42.48	-40.283	87.203	0.467	0.238	0.162	0.544	0.162	0.696	-0.143	0.391	0.086	0.467
87.403	-64.941	-66.04	-66.284	-66.406	-45.532	-45.166	-45.654	-44.556	-42.48	-40.405	87.403	0.238	0.238	0.162	0.925	0.086	0.467	0.086	0.315	-0.143	0.544
87.604	-64.941	-65.918	-66.284	-66.406	-45.532	-45.044	-45.776	-44.678	-42.603	-40.527	87.604	0.238	0.467	0.162	0.925	-0.067	0.238	0.238	0.086	-0.296	0.162
87.804	-64.941	-65.918	-66.284	-66.406	-45.532	-45.166	-45.776	-44.8	-42.725	-40.649	87.804	0.467	0.62	0.162	0.544	0.01	0.086	0.544	0.238	-0.143	-0.219
88.004	-64.941	-65.918	-66.284	-66.406	-45.654	-45.288	-45.776	-44.8	-42.725	-40.771	88.004	0.544	0.467	0.162	0.162	0.315	-0.143	0.925	0.544	0.086	-0.143
88.204	-64.941	-66.04	-66.284	-66.406	-45.776	-45.41	-45.898	-44.922	-42.847	-40.894	88.204	0.162	0.238	0.162	-0.143	0.391	-0.296	0.925	0.391	0.086	0.086
88.404	-64.941	-65.918	-66.284	-66.406	-45.898	-45.41	-46.021	-45.044	-42.969	-40.894	88.404	-0.143	0.162	0.162	-0.372	0.238	-0.143	0.544	-0.067	-0.143	0.162
88.604	-64.941	-65.918	-66.284	-66.406	-46.021	-45.532	-46.021	-45.044	-43.091	-41.016	88.604	0.162	0.162	0.162	-0.448	0.162	0.162	0.238	-0.296	-0.296	0.162
88.804	-65.063	-65.918	-66.284	-66.406	-46.143	-45.532	-46.143	-45.166	-43.213	-41.138	88.804	0.544	0.162	0.238	-0.296	0.162	0.467	0.162	-0.067	-0.143	0.162
89.004	-64.941	-65.918	-66.284	-66.406	-46.143	-45.654	-46.265	-45.288	-43.335	-41.26	89.004	0.467	0.162	0.467	0.162	0.162	0.62	0.162	0.391	0.086	0.162
89.204	-64.941	-65.918	-66.284	-66.406	-46.265	-45.776	-46.265	-45.288	-43.457	-41.382	89.204	0.238	0.162	0.62	0.544	0.086	0.467	0.162	0.62	0.086	0.162
89.404	-64.941	-66.04	-66.284	-66.284	-46.265	-45.776	-46.387	-45.41	-43.457	-41.504	89.404	0.162	0.162	0.467	0.467	-0.067	0.238	0.238	0.544	-0.143	0.162
89.604	-64.941	-66.04	-66.284	-66.406	-46.387	-45.776	-46.509	-45.532	-43.579	-41.504	89.604	0.162	0.162	0.238	0.238	-0.067	0.238	0.467	0.544	-0.296	0.162
89.804	-64.941	-66.04	-66.284	-66.406	-46.387	-45.898	-46.509	-45.532	-43.579	-41.626	89.804	0.162	0.238	0.238	0.162	0.01	0.467	0.62	0.62	-0.143	0.162
90.004	-64.941	-65.918	-66.284	-66.406	-46.509	-46.021	-46.631	-45.654	-43.701	-41.626	90.004	0.162	0.544	0.467	0.238	-0.067	0.62	0.467	0.467	0.086	0.162
90.204	-64.941	-66.04	-66.284	-66.406	-46.631	-46.021	-46.631	-45.776	-43.823	-41.87	90.204	0.238	0.925	0.62	0.467	-0.067	0.544	0.315	0.238	0.162	0.162
90.404	-64.941	-66.04	-66.284	-66.406	-46.631	-46.143	-46.753	-45.776	-43.945	-41.992	90.404	0.467	0.925	0.467	0.62	0.01	0.544	0.544	0.162	0.162	0.162
90.604	-65.063	-66.04	-66.162	-66.406	-46.753	-46.143	-46.753	-45.898	-44.067	-42.114	90.604	0.62	0.544	0.238	0.467	-0.143	0.62	0.925	0.162	0.162	0.162
90.804	-65.063	-66.04	-66.284	-66.406	-46.875	-46.265	-46.875	-46.021	-44.189	-42.236	90.804	0.467	0.315	0.162	0.238	-0.296	0.467	0.925	0.162	0.162	0.086
91.004	-64.941	-66.04	-66.284	-66.406	-46.875	-46.265	-46.997	-46.021	-44.312	-42.236	91.004	0.238	0.544	0.162	0.162	-0.143	0.238	0.544	0.162	0.162	-0.219
91.204	-64.941	-66.04	-66.162	-66.406	-46.997	-46.387	-46.997	-46.143	-44.312	-42.358	91.204	0.162	0.925	0.162	0.238	0.086	0.162	0.238	0.162	0.162	-0.677
91.404	-64.941	-66.04	-66.284	-66.406	-46.997	-46.509	-46.997	-46.265	-44.556	-42.358	91.404	0.162	0.925	0.238	0.467	0.162	0.238	0.162	0.162	0.162	-0.906
91.604	-65.063	-66.04	-66.284	-66.406	-47.119	-46.509	-47.119	-46.387	-44.556	-42.603	91.604	0.162	0.62	0.544	0.696	0.162	0.467	0.162	0.086	0.162	-0.677
91.804	-64.941	-66.04	-66.284	-66.406	-47.241	-46.631	-47.241	-46.387	-44.678	-42.725	91.804	0.086	0.62	0.925	0.772	0.162	0.696	0.162	-0.143	0.086	-0.296
92.004	-65.063	-66.04	-66.284	-66.528	-47.241	-46.753	-47.241	-46.509	-44.8	-42.847	92.004	-0.067	0.925	0.925	0.696	0.162	0.772	0.162	-0.296	-0.143	-0.219
92.204	-65.063	-66.04	-66.284	-66.406	-47.363	-46.753	-47.363	-46.631	-44.8	-42.847	92.204	0.01	0.925	0.62	0.467	0.238	0.696	0.162	-0.143	-0.219	-0.372
92.404	-65.063	-65.918	-66.162	-66.528	-47.485	-46.875	-47.485	-46.631	-44.922	-42.969	92.404	0.315	0.62	0.62	0.238	0.391	0.391	0.162	0.086	0.162	-0.448
92.604	-65.063	-66.04	-66.284	-66.406	-47.485	-46.875	-47.607	-46.753	-45.044	-43.091	92.604	0.391	0.62	0.925	0.086	0.315	-0.067	0.162	0.086	0.544	-0.448
92.804	-65.063	-66.04	-66.162	-66.406	-47.607	-46.997	-47.607	-46.875	-45.166	-43.091	92.804	0.238	0.925	0.925	-0.219	0.01	-0.296	0.086	-0.143	0.467	-0.448
93.004	-65.063	-66.04	-66.284	-66.528	-47.729	-46.997	-47.607	-46.875	-45.166	-43.213	93.004	0.162	0.925	0.544	-0.601	-0.067	-0.143	-0.143	-0.296	0.238	-0.372
93.204	-64.941	-66.04	-66.284	-66.528	-47.729	-47.119	-47.729	-46.997	-45.288	-43.335	93.204	0.162	0.544	0.238	-0.601	0.086	0.01	-0.296	-0.219	0.086	-0.143
93.404	-65.063	-66.04	-66.162	-66.406	-47.852	-47.241	-47.852	-46.997	-45.41	-43.457	93.404	0.162	0.238	0.162	-0.219	0.162	-0.143	-0.143	-0.296	-0.219	0.086
93.604	-65.063	-66.04	-66.284	-66.406	-47.974	-47.363	-47.974	-47.119	-45.532	-43.579	93.604	0.162	0.162	0.162	0.01	0.162	-0.219	0.086	-0.601	-0.601	0.086
93.804	-65.063	-66.04	-66.284	-66.406	-47.974	-47.363	-47.974	-47.241	-45.532	-43.579	93.804	0.162	0.162	0.162	-0.219	0.162	0.162	0.162	-0.601	-0.677	-0.219
94.004	-65.063	-66.04	-66.284	-66.406	-48.096	-47.363	-48.096	-47.363	-45.654	-43.701	94.004	0.162	0.086	0.238	-0.677	0.162	0.467	0.162	-0.219	-0.525	-0.677
94.204	-65.063	-66.04	-66.284	-66.406	-48.096	-47.363	-48.096	-47.363	-45.776	-43.823	94.204	0.162	-0.143	0.467	-0.906	0.086	0.162	0.162	0.01	-0.448	-0.982
94.404	-65.063	-66.04	-66.284	-66.406	-48.218	-47.607	-48.218	-47.485	-45.898	-43.823	94.404	0.238	-0.296	0.62	-0.677	-0.219	-0.219	0.162	-0.219	-0.448	-1.059
94.604	-65.063	-66.04	-66.284	-66.406	-48.218	-47.607	-48.218	-47.607	-45.898	-44.067	94.604	0.467	-0.143	0.467	-0.296	-0.525	-0.143	0.086	-0.601	-0.372	-1.059
94.804	-65.063	-66.04	-66.284	-66.406	-48.34	-47.607	-48.34	-47.607	-46.143	-44.189	94.804	0.544	0.086	0.315	-0.296	-0.296	0.01	-0.143	-0.601	-0.143	-0.982
95.004	-65.063	-66.04	-66.284	-66.528	-48.584	-47.729	-48.34	-47.729	-46.143	-44.189	95.004	0.162	0.162	0.544	-0.601	0.162	-0.219	-0.372	-0.219	0.086	-0.677
95.204	-65.063	-66.04	-66.284	-66.406	-48.584	-47.852	-48.462	-47.729	-46.265	-44.312	95.204	-0.219	0.238	1.001	-0.601	0.01	-0.677	-0.525	0.086	0.086	-0.219
95.404	-65.063	-66.04	-66.284	-66.406	-48.584	-47.852	-48.584	-47.852	-46.265	-44.434	95.404	-0.143	0.467	1.23	-0.296	-0.525	-0.906	-0.677	0.162	-0.219	0.01
95.604	-65.063	-65.918	-66.284	-66.406	-48.706	-47.974	-48.584	-47.974	-46.509	-44.556	95.604	0.086	0.62	1.078	-0.296	-0.677	-0.753	-0.677	0.162	-0.601	-0.219
95.804	-65.063	-66.04	-66.284	-66.406	-48.828	-47.974	-48.706	-47.974	-46.631	-44.556	95.804	0.162	0.467	0.849	-0.601	-0.601	-0.525	-0.601	0.162	-0.601	-0.525
96.004	-65.063	-66.04	-66.284	-66.406	-48.828	-48.096	-48.706	-48.096	-46.631	-44.678	96.004	0.162	0.162	0.696	-0.601	-0.753	-0.372	-0.677	0.162	-0.219	-0.372
96.204	-65.063	-66.162	-66.284	-66.406	-48.95	-48.096	-48.828	-48.218	-46.753	-44.8	96.204	0.086	-0.143	0.391	-0.219	-0.906	-0.143	-0.601	0.086	0.01	-0.067
96.404	-65.063	-66.04	-66.284	-66.406	-49.072	-48.218	-48.828	-48.34	-46.753	-44.922	96.404	-0.143	-0.372	-0.143	0.086	-0.677	0.086	-0.296	-0.219	-0.143	-0.143
96.604	-65.063	-66.162	-66.284	-66.406	-49.072	-48.34	-48.95	-48.34	-46.875	-45.044	96.604	-0.372	-0.448	-0.601	0.162	-0.296	0.086	-0.219	-0.601	-0.296	-0.372
96.804	-65.063	-66.162	-66.284	-66.406	-49.072	-48.34	-49.072	-48.462	-46.997	-45.166	96.804	-0.448	-0.372	-0.677	0.238	-0.296	-0.219	-0.296	-0.601	-0.143	-0.372
97.004	-64.941	-66.162	-66.284	-66.406	-49.194	-48.34	-49.072	-48.462	-46.997	-45.288	97.004	-0.372	-0.219	-0.525	0.391	-0.677	-0.601	-0.143	-0.219	0.01	-0.219
97.204	-64.941	-66.04	-66.284	-66.406	-49.316	-48.462	-49.194	-48.584	-47.119	-45.288	97.204	-0.143	-0.219	-0.372	0.315	-0.906	-0.525	0.086	0.01	-0.143	-0.296
97.404	-65.063	-66.04	-66.284	-66.284	-49.316	-48.584	-49.194	-48.584	-47.241	-45.41	97.404	0.01	-0.296	-0.143	-0.067	-0.753	0.01	0.162	-0.143	-0.296	-0.601
97.604	-64.941	-66.04	-66.162	-66.406	-49.438	-48.584	-49.316	-48.706	-47.363	-45.532	97.604	-0.219	-0.143	0.086	-0.372	-0.525	0.238	0.162	-0.296	-0.219	-0.601
97.804	-64.941	-66.04	-66.284	-66.406	-49.438	-48.706	-49.316	-48.828	-47.363	-45.654	97.804	-0.601	0.086	0.086	-0.448	-0.448	-0.067	0.162	-0.219	-0.296	-0.219
98.004	-65.063	-66.04	-66.162	-66.406	-49.561	-48.828	-49.438	-48.828	-47.485	-45.654	98.004	-0.601	0.162	-0.143	-0.448	-0.448	-0.372	0.162	-0.296	-0.601	0.01
98.204	-65.063	-66.04	-66.284	-66.406	-49.683	-48.828	-49.438	-48.95	-47.607	-45.776	98.204	-0.219	0.162	-0.296	-0.372	-0.372	-0.372	0.086	-0.677	-0.525	-0.219
98.404	-64.941	-66.04	-66.284	-66.406	-49.805	-48.95	-49.561	-49.072	-47.729	-45.776	98.404	0.01	0.162	-0.143	-0.143	-0.067	-0.219	-0.143	-0.906	0.086	-0.601
98.604	-64.941	-66.04	-66.284	-66.406	-49.805	-48.95	-49.683	-49.072	-47.729	-45.898	98.604	-0.219	0.162	0.086	0.086	0.315	-0.296	-0.372	-0.677	0.544	-0.601
98.804	-65.063	-66.04	-66.162	-66.406	-49.805	-49.072	-49.683	-49.194	-47.852	-46.021	98.804	-0.601	0.162	0.162	0.086	0.238	-0.601	-0.448	-0.296	0.391	-0.296
99.004	-65.063	-66.04	-66.162	-66.406	-49.927	-49.072	-49.805	-49.316	-47.974	-46.143	99.004	-0.601	0.086	0.086	-0.219	-0.296	-0.601	-0.448	-0.296	-0.067	-0.296
99.204	-65.063	-66.04	-66.284	-66.406	-50.049	-49.194	-49.805	-49.438	-47.974	-46.265	99.204	-0.219	-0.219	-0.143	-0.601	-0.448	-0.219	-0.448	-0.601	-0.296	-0.601
99.404	-64.941	-66.04	-66.284	-66.528	-50.049	-49.194	-49.927	-49.561	-48.096	-46.265	99.404	0.01	-0.601	-0.296	-0.601	0.01	0.086	-0.372	-0.601	-0.143	-0.601
99.604	-64.941	-66.04	-66.162	-66.406	-50.171	-49.316	-50.049	-49.561	-48.218	-46.387	99.604	-0.219	-0.601	-0.143	-0.219	0.238	0.162	-0.143	-0.219	0.01	-0.219
99.804	-65.063	-66.162	-66.284	-66.406	-50.171	-49.316	-50.049	-49.683	-48.34	-46.387	99.804	-0.601	-0.219	0.086	0.01	-0.067	0.162	0.086	0.01	-0.143	0.01
100.004	-64.941	-66.04	-66.284	-66.406	-50.293	-49.438	-50.171	-49.683	-48.34	-46.509	100.004	-0.601	0.086	0.162	-0.143	-0.372	0.162	0.238	-0.143	-0.296	-0.219
100.204	-64.941	-66.04	-66.284	-66.406	-50.293	-49.438	-50.293	-49.805	-48.462	-46.631	100.204	-0.219	0.162	0.162	-0.296	-0.372	0.162	0.467	-0.296	-0.143	-0.601
100.404	-65.063	-66.04	-66.284	-66.406	-50.415	-49.561	-50.293	-49.805	-48.584	-46.631	100.404	0.01	0.162	0.086	-0.219	-0.219	0.162	0.62	-0.219	0.01	-0.525
100.604	-65.063	-66.04	-66.284	-66.406	-50.537	-49.683	-50.293	-49.927	-48.706	-46.753	100.604	-0.143	0.162	-0.143	-0.219	-0.219	0.086	0.467	-0.219	-0.143	0.086
100.804	-65.063	-66.04	-66.284	-66.406	-50.659	-49.683	-50.537	-50.049	-48.706	-46.875	100.804	-0.296	0.162	-0.296	-0.219	-0.219	-0.143	0.238	-0.296	-0.296	0.544
101.004	-65.063	-66.04	-66.284	-66.406	-50.659	-49.683	-50.537	-50.171	-48.828	-46.997	101.004	-0.143	0.162	-0.067	0.238	0.162	-0.296	0.162	-0.143	-0.219	0.467
101.204	-65.063	-66.04	-66.162	-66.284	-50.781	-49.805	-50.537	-50.171	-48.828	-47.119	101.204	0.01	0.162	0.467	0.849	0.467	-0.219	0.086	0.086	-0.219	0.238
101.404	-65.063	-66.04	-66.284	-66.406	-50.781	-49.927	-50.659	-50.293	-48.95	-47.119	101.404	-0.143	0.162	0.925	0.925	0.086	-0.219	-0.219	0.086	-0.296	0.162
101.604	-64.941	-66.162	-66.284	-66.406	-50.903	-49.927	-50.659	-50.415	-48.95	-47.241	101.604	-0.296	0.162	0.925	0.467	-0.525	-0.296	-0.601	-0.143	-0.143	0.162
101.804	-65.063	-66.162	-66.284	-66.284	-50.903	-49.927	-50.781	-50.415	-49.072	-47.363	101.804	-0.143	0.086	0.544	-0.067	-0.601	-0.219	-0.601	-0.296	0.086	0.162
102.004	-65.063	-66.04	-66.284	-66.284	-51.025	-50.049	-50.781	-50.415	-49.194	-47.485	102.004	0.086	-0.219	0.238	-0.296	-0.219	-0.219	-0.219	-0.067	0.162	0.162
102.204	-64.941	-66.162	-66.284	-66.406	-51.147	-50.049	-50.903	-50.537	-49.316	-47.485	102.204	0.086	-0.601	0.086	-0.143	0.01	-0.296	0.086	0.391	0.162	0.162
102.404	-64.941	-66.04	-66.284	-66.284	-51.147	-50.171	-50.903	-50.659	-49.316	-47.607	102.404	-0.219	-0.601	-0.219	0.01	-0.143	-0.067	0.086	0.62	0.086	0.162
102.604	-64.941	-66.04	-66.284	-66.406	-51.147	-50.293	-50.903	-50.659	-49.438	-47.852	102.604	-0.601	-0.219	-0.677	-0.143	-0.219	0.391	-0.143	0.391	-0.143	0.162
102.804	-64.941	-66.162	-66.162	-66.284	-51.27	-50.293	-51.025	-50.781	-49.438	-47.852	102.804	-0.601	0.086	-0.906	-0.296	0.162	0.544	-0.219	0.01	-0.296	0.162
103.004	-64.941	-66.162	-66.284	-66.284	-51.392	-50.415	-51.147	-50.781	-49.561	-47.974	103.004	-0.296	0.162	-0.677	-0.067	0.544	0.162	0.162	0.01	-0.143	0.162
103.204	-65.063	-66.162	-66.162	-66.284	-51.392	-50.415	-51.147	-50.903	-49.683	-48.096	103.204	-0.296	0.162	-0.219	0.391	0.467	-0.219	0.544	0.238	0.086	0.162
103.404	-65.063	-66.04	-66.162	-66.406	-51.514	-50.537	-51.147	-51.025	-49.805	-48.218	103.404	-0.601	0.162	0.086	0.62	0.238	-0.143	0.467	0.086	0.238	0.162
103.604	-65.063	-66.04	-66.162	-66.406	-51.514	-50.659	-51.27	-51.025	-49.805	-48.218	103.604	-0.601	0.162	0.162	0.467	0.162	0.086	0.238	-0.219	0.544	0.238
103.804	-65.063	-66.04	-66.162	-66.406	-51.636	-50.781	-51.27	-51.147	-49.927	-48.34	103.804	-0.219	0.162	0.162	0.238	0.162	0.162	0.162	-0.143	0.849	0.544
104.004	-64.941	-66.04	-66.162	-66.406	-51.636	-50.781	-51.392	-51.147	-50.049	-48.34	104.004	0.086	0.238	0.086	0.162	0.162	0.238	0.162	0.086	0.62	0.925
104.204	-65.063	-66.04	-66.162	-66.406	-51.758	-50.659	-51.392	-51.27	-50.049	-48.462	104.204	0.238	0.467	-0.143	0.162	0.162	0.467	0.238	0.162	0.086	0.925
104.404	-64.941	-66.04	-66.162	-66.528	-51.758	-50.781	-51.514	-51.392	-50.171	-48.584	104.404	0.544	0.62	-0.296	0.238	0.238	0.62	0.467	0.162	0.01	0.62
104.604	-64.941	-66.04	-66.162	-66.284	-51.88	-50.903	-51.514	-51.392	-50.171	-48.584	104.604	0.925	0.391	-0.067	0.467	0.467	0.467	0.62	0.238	0.391	0.62
104.804	-64.941	-66.04	-66.162	-66.406	-52.002	-51.025	-51.636	-51.514	-50.415	-48.706	104.804	0.925	0.01	0.391	0.62	0.62	0.315	0.467	0.467	0.62	0.925
105.004	-64.941	-66.04	-66.162	-66.406	-52.002	-51.025	-51.636	-51.636	-50.415	-48.828	105.004	0.62	0.086	0.62	0.544	0.391	0.544	0.238	0.62	0.467	0.925
105.204	-64.941	-66.04	-66.162	-66.406	-52.124	-51.025	-51.758	-51.636	-50.537	-48.828	105.204	0.544	0.62	0.467	0.544	-0.067	1.001	0.238	0.467	0.238	0.544
105.404	-64.941	-66.04	-66.162	-66.406	-52.124	-51.025	-51.88	-51.758	-50.659	-48.95	105.404	0.62	0.849	0.315	0.696	-0.296	1.23	0.467	0.238	0.162	0.238
105.604	-64.941	-66.04	-66.162	-66.406	-52.246	-51.27	-51.88	-51.758	-50.659	-48.95	105.604	0.467	0.544	0.544	0.849	-0.143	1.078	0.62	0.162	0.162	0.162
105.804	-65.063	-66.04	-66.162	-66.406	-52.246	-51.27	-52.002	-51.758	-50.781	-49.072	105.804	0.238	0.315	0.925	1.001	0.086	0.925	0.467	0.162	0.162	0.162
106.004	-64.941	-66.04	-66.162	-66.406	-52.368	-51.392	-52.002	-51.88	-50.781	-49.194	106.004	0.238	0.467	0.925	0.925	0.162	1.001	0.315	0.162	0.162	0.162
106.204	-64.941	-66.04	-66.284	-66.406	-52.368	-51.392	-52.124	-52.002	-51.025	-49.194	106.204	0.467	0.696	0.62	0.62	0.162	0.925	0.467	0.238	0.162	0.162
106.404	-64.941	-66.04	-66.162	-66.406	-52.49	-51.514	-52.124	-52.002	-51.025	-49.316	106.404	0.62	0.772	0.62	0.62	0.162	0.544	0.62	0.467	0.162	0.162
106.604	-64.941	-66.04	-66.162	-66.406	-52.49	-51.636	-52.124	-52.124	-51.147	-49.438	106.604	0.467	0.696	0.925	0.925	0.162	0.315	0.467	0.62	0.162	0.162
106.804	-64.941	-66.04	-66.162	-66.406	-52.612	-51.636	-52.246	-52.124	-51.147	-49.561	106.804	0.315	0.544	0.925	0.925	0.162	0.467	0.238	0.467	0.162	0.162
107.004	-65.063	-66.162	-66.162	-66.284	-52.734	-51.636	-52.368	-52.246	-51.27	-49.683	107.004	0.544	0.544	0.62	0.62	0.238	0.696	0.162	0.238	0.162	0.162
107.204	-64.941	-66.162	-66.162	-66.284	-52.734	-51.758	-52.368	-52.368	-51.27	-49.683	107.204	1.001	0.62	0.62	0.62	0.467	0.696	0.162	0.162	0.162	0.238
107.404	-64.941	-66.04	-66.162	-66.284	-52.734	-51.88	-52.49	-52.368	-51.392	-49.683	107.404	1.23	0.467	0.925	0.925	0.62	0.391	0.162	0.162	0.162	0.544
107.604	-64.941	-66.162	-66.284	-66.284	-52.856	-51.88	-52.49	-52.49	-51.514	-49.927	107.604	1.001	0.315	0.925	0.925	0.467	0.01	0.162	0.162	0.162	0.925
107.804	-64.941	-66.04	-66.284	-66.284	-52.979	-52.002	-52.612	-52.49	-51.636	-49.927	107.804	0.544	0.467	0.544	0.544	0.238	0.01	0.238	0.238	0.162	0.849
108.004	-64.941	-66.162	-66.284	-66.406	-52.979	-52.002	-52.612	-52.612	-51.636	-50.049	108.004	0.238	0.62	0.315	0.315	0.162	0.391	0.391	0.544	0.162	0.238
108.204	-64.941	-66.162	-66.162	-66.284	-53.101	-52.002	-52.734	-52.734	-51.758	-50.293	108.204	0.162	0.467	0.544	0.544	0.086	0.62	0.315	0.925	0.086	-0.143
108.404	-65.063	-66.04	-66.284	-66.284	-53.101	-52.124	-52.734	-52.734	-51.758	-50.293	108.404	0.162	0.238	0.925	0.925	-0.143	0.467	0.01	0.925	-0.143	0.162
108.604	-65.063	-66.162	-66.284	-66.284	-53.223	-52.124	-52.734	-52.734	-51.88	-50.415	108.604	0.162	0.162	0.849	0.925	-0.296	0.238	-0.067	0.544	-0.296	0.544
108.804	-65.063	-66.04	-66.284	-66.284	-53.345	-52.246	-52.856	-52.734	-51.88	-50.415	108.804	0.162	0.162	0.315	0.62	-0.067	0.162	0.086	0.238	-0.143	0.467
109.004	-65.063	-66.162	-66.284	-66.284	-53.345	-52.368	-52.856	-52.856	-52.002	-50.415	109.004	0.162	0.162	0.086	0.544	0.391	0.086	0.162	0.162	0.162	0.315
109.204	-65.063	-66.162	-66.284	-66.284	-53.467	-52.368	-52.979	-52.979	-52.124	-50.659	109.204	0.086	0.162	0.315	0.62	0.62	-0.143	0.162	0.162	0.391	0.544
109.404	-64.941	-66.162	-66.162	-66.284	-53.467	-52.49	-52.979	-53.101	-52.124	-50.781	109.404	-0.143	0.238	0.391	0.467	0.467	-0.296	0.162	0.162	0.315	0.925
109.604	-65.063	-66.162	-66.284	-66.284	-53.589	-52.49	-53.101	-53.101	-52.246	-50.903	109.604	-0.219	0.467	0.238	0.238	0.315	-0.143	0.238	0.162	0.01	0.849
109.804	-65.063	-66.162	-66.284	-66.284	-53.589	-52.612	-53.223	-53.223	-52.368	-50.903	109.804	0.162	0.62	0.162	0.238	0.544	0.086	0.544	0.238	-0.067	0.238
110.004	-65.063	-66.162	-66.284	-66.284	-53.711	-52.612	-53.223	-53.345	-52.368	-51.025	110.004	0.544	0.544	0.162	0.544	0.925	0.086	0.925	0.467	0.162	-0.219
110.204	-65.063	-66.162	-66.284	-66.406	-53.711	-52.734	-53.223	-53.345	-52.368	-51.025	110.204	0.467	0.62	0.162	0.925	0.849	-0.067	0.925	0.62	0.544	-0.143
110.404	-65.063	-66.162	-66.284	-66.284	-53.711	-52.734	-53.345	-53.467	-52.49	-51.147	110.404	0.315	0.925	0.162	0.925	0.238	0.01	0.544	0.544	1.001	0.086
110.604	-64.941	-66.162	-66.284	-66.406	-53.833	-52.856	-53.345	-53.467	-52.49	-51.147	110.604	0.467	0.925	0.238	0.544	-0.219	0.315	0.315	0.544	1.307	0.162
110.804	-65.063	-66.04	-66.284	-66.406	-53.955	-52.856	-53.345	-53.589	-52.734	-51.27	110.804	0.696	0.62	0.544	0.238	-0.143	0.391	0.467	0.62	1.307	0.162
111.004	-65.063	-66.04	-66.284	-66.406	-53.955	-52.979	-53.467	-53.589	-52.856	-51.392	111.004	0.772	0.544	0.925	0.162	0.086	0.315	0.62	0.467	1.001	0.086
111.204	-65.063	-66.04	-66.284	-66.406	-53.955	-52.979	-53.467	-53.711	-52.856	-51.514	111.204	0.696	0.62	0.925	0.162	0.162	0.544	0.467	0.238	0.544	-0.219
111.404	-65.063	-66.04	-66.284	-66.406	-54.077	-53.101	-53.467	-53.711	-52.979	-51.514	111.404	0.467	0.467	0.544	0.238	0.162	0.925	0.238	0.162	0.238	-0.601
111.604	-64.941	-66.04	-66.162	-66.406	-54.077	-53.101	-53.589	-53.833	-52.979	-51.514	111.604	0.238	0.238	0.238	0.544	0.162	0.925	0.162	0.162	0.162	-0.601
111.804	-65.063	-66.04	-66.284	-66.406	-54.199	-53.101	-53.711	-53.833	-53.101	-51.636	111.804	0.162	0.238	0.162	0.925	0.086	0.544	0.162	0.086	0.086	-0.219
112.004	-64.941	-66.04	-66.284	-66.406	-54.199	-53.223	-53.711	-53.955	-53.101	-51.636	112.004	0.162	0.467	0.162	0.925	-0.143	0.238	0.162	-0.143	-0.143	0.086
112.204	-65.063	-66.04	-66.284	-66.406	-54.321	-53.345	-53.833	-53.955	-53.223	-51.758	112.204	0.238	0.62	0.162	0.544	-0.296	0.162	0.162	-0.296	-0.296	0.162
112.404	-65.063	-66.04	-66.284	-66.284	-54.443	-53.345	-53.833	-54.077	-53.223	-51.88	112.404	0.467	0.467	0.238	0.238	-0.143	0.162	0.162	-0.143	-0.143	0.162
112.605	-64.941	-66.162	-66.284	-66.406	-54.443	-53.345	-53.955	-54.077	-53.345	-51.88	112.605	0.62	0.315	0.467	0.162	0.086	0.162	0.086	0.086	0.086	0.162
112.805	-64.941	-66.04	-66.406	-66.406	-54.443	-53.589	-53.955	-54.199	-53.467	-52.002	112.805	0.467	0.467	0.62	0.162	0.086	0.162	-0.219	0.086	0.086	0.162
113.005	-64.941	-66.04	-66.284	-66.406	-54.565	-53.467	-54.077	-54.199	-53.589	-52.124	113.005	0.315	0.696	0.467	0.162	-0.219	0.162	-0.601	-0.219	-0.143	0.086
113.205	-65.063	-66.162	-66.406	-66.406	-54.688	-53.711	-54.077	-54.321	-53.589	-52.124	113.205	0.467	0.772	0.238	0.162	-0.601	0.162	-0.677	-0.601	-0.296	-0.143
113.405	-65.063	-66.04	-66.284	-66.406	-54.688	-53.711	-54.077	-54.321	-53.711	-52.246	113.405	0.544	0.696	0.162	0.238	-0.601	0.086	-0.525	-0.601	-0.143	-0.296
113.605	-65.063	-66.04	-66.284	-66.406	-54.565	-53.711	-54.199	-54.321	-53.711	-52.246	113.605	0.162	0.467	0.162	0.467	-0.296	-0.143	-0.372	-0.296	0.086	-0.219
113.805	-65.063	-66.162	-66.406	-66.406	-54.81	-53.833	-54.199	-54.443	-53.833	-52.368	113.805	-0.219	0.238	0.162	0.62	-0.219	-0.296	-0.143	-0.219	0.162	-0.296
114.005	-65.063	-66.162	-66.406	-66.284	-54.81	-53.833	-54.321	-54.565	-53.833	-52.49	114.005	-0.143	0.162	0.162	0.467	-0.296	-0.143	0.162	-0.296	0.162	-0.677
114.205	-64.941	-66.04	-66.406	-66.406	-54.81	-53.833	-54.321	-54.565	-53.955	-52.612	114.205	0.01	0.086	0.162	0.238	-0.143	0.086	0.391	-0.143	0.162	-0.982
114.405	-65.063	-66.162	-66.284	-66.284	-54.932	-53.955	-54.321	-54.565	-53.955	-52.734	114.405	-0.143	-0.219	0.162	0.086	0.086	0.162	0.315	0.086	0.162	-1.059
114.605	-65.063	-66.162	-66.406	-66.406	-54.932	-54.077	-54.443	-54.688	-54.077	-52.734	114.605	-0.372	-0.601	0.162	-0.219	0.162	0.162	-0.067	0.162	0.086	-1.059
114.805	-64.941	-66.162	-66.406	-66.284	-55.054	-54.077	-54.443	-54.81	-54.077	-52.734	114.805	-0.448	-0.601	0.162	-0.677	0.162	0.086	-0.448	0.086	-0.143	-0.982
115.005	-65.063	-66.162	-66.406	-66.284	-55.176	-54.077	-54.565	-54.81	-54.199	-52.979	115.005	-0.372	-0.219	0.162	-0.906	0.162	-0.143	-0.677	-0.143	-0.296	-0.677
115.205	-65.063	-66.162	-66.284	-66.406	-55.176	-54.077	-54.565	-54.81	-54.199	-52.979	115.205	-0.143	0.086	0.162	-0.677	0.086	-0.296	-0.677	-0.296	-0.143	-0.296
115.405	-65.063	-66.162	-66.284	-66.406	-55.176	-54.199	-54.688	-54.932	-54.321	-53.101	115.405	0.086	0.086	0.162	-0.219	-0.219	-0.143	-0.525	-0.143	0.086	-0.296
115.605	-65.186	-66.162	-66.284	-66.406	-55.176	-54.199	-54.688	-54.932	-54.443	-53.101	115.605	0.086	-0.219	0.086	0.01	-0.677	0.086	-0.372	0.01	0.162	-0.601
115.805	-65.063	-66.162	-66.284	-66.284	-55.298	-54.321	-54.688	-55.054	-54.443	-53.223	115.805	-0.143	-0.677	-0.143	-0.219	-0.906	0.162	-0.143	-0.219	0.086	-0.677
116.005	-65.063	-66.162	-66.284	-66.284	-55.298	-54.321	-54.81	-55.054	-54.443	-53.345	116.005	-0.372	-0.982	-0.296	-0.601	-0.677	0.162	0.01	-0.601	-0.219	-0.525
116.205	-65.063	-66.162	-66.284	-66.406	-55.42	-54.321	-54.932	-55.176	-54.565	-53.345	116.205	-0.525	-0.982	-0.143	-0.525	-0.296	0.086	-0.219	-0.677	-0.677	-0.372
116.405	-65.063	-66.162	-66.284	-66.406	-55.42	-54.443	-54.932	-55.176	-54.565	-53.345	116.405	-0.677	-0.677	0.01	0.01	-0.219	-0.143	-0.601	-0.525	-0.906	-0.143
116.605	-65.063	-66.162	-66.284	-66.284	-55.542	-54.443	-55.054	-55.298	-54.688	-53.589	116.605	-0.601	-0.219	-0.219	0.238	-0.296	-0.296	-0.525	-0.372	-0.677	0.01
116.805	-65.063	-66.162	-66.284	-66.284	-55.542	-54.565	-55.054	-55.298	-54.688	-53.589	116.805	-0.296	0.086	-0.601	0.01	-0.143	-0.219	0.086	-0.143	-0.219	-0.219
117.005	-65.063	-66.04	-66.284	-66.406	-55.664	-54.565	-55.054	-55.42	-54.688	-53.711	117.005	-0.296	0.162	-0.601	-0.067	0.086	-0.296	0.544	0.086	0.086	-0.601
117.205	-65.063	-66.04	-66.284	-66.406	-55.664	-54.688	-55.176	-55.42	-54.932	-53.711	117.205	-0.601	0.162	-0.219	0.01	0.086	-0.601	0.467	0.086	0.162	-0.677
117.405	-64.941	-66.04	-66.284	-66.406	-55.664	-54.688	-55.176	-55.542	-54.932	-53.711	117.405	-0.677	0.086	0.086	-0.143	-0.143	-0.601	0.315	-0.143	0.086	-0.525
117.605	-64.941	-66.04	-66.284	-66.406	-55.786	-54.81	-55.298	-55.542	-55.054	-53.833	117.605	-0.525	-0.219	0.086	-0.296	-0.219	-0.296	0.467	-0.296	-0.143	-0.372
117.805	-65.063	-66.162	-66.284	-66.406	-55.786	-54.81	-55.298	-55.664	-55.176	-53.955	117.805	-0.448	-0.677	-0.219	-0.219	0.162	-0.219	0.544	-0.219	-0.296	-0.143
118.005	-65.063	-66.162	-66.284	-66.406	-55.908	-54.932	-55.298	-55.664	-55.176	-53.955	118.005	-0.525	-0.906	-0.601	-0.296	0.544	-0.296	0.162	-0.296	-0.219	0.01
118.205	-65.063	-66.162	-66.284	-66.406	-56.03	-54.932	-55.42	-55.786	-55.176	-54.077	118.205	-0.601	-0.677	-0.677	-0.677	0.467	-0.143	-0.296	-0.677	-0.296	-0.219
118.405	-64.941	-66.04	-66.284	-66.406	-56.03	-55.054	-55.42	-55.786	-55.176	-54.077	118.405	-0.372	-0.219	-0.525	-0.906	0.238	0.086	-0.448	-0.906	-0.601	-0.677
118.605	-65.063	-66.162	-66.284	-66.528	-56.03	-55.054	-55.42	-55.908	-55.298	-54.199	118.605	-0.067	0.086	-0.372	-0.677	0.162	0.086	-0.448	-0.677	-0.601	-0.906
118.805	-65.063	-66.04	-66.406	-66.406	-56.152	-55.054	-55.542	-55.908	-55.42	-54.199	118.805	-0.143	0.162	-0.143	-0.219	0.162	-0.219	-0.448	-0.219	-0.296	-0.677
119.005	-64.941	-66.162	-66.284	-66.406	-56.152	-55.054	-55.542	-55.908	-55.42	-54.321	119.005	-0.372	0.162	0.086	0.086	0.086	-0.525	-0.372	0.01	-0.219	-0.219
119.205	-65.063	-66.162	-66.284	-66.406	-56.152	-55.176	-55.664	-55.908	-55.542	-54.321	119.205	-0.372	0.162	0.086	0.086	-0.143	-0.296	-0.143	-0.143	-0.296	0.01
119.405	-65.063	-66.162	-66.284	-66.406	-56.274	-55.298	-55.664	-56.03	-55.542	-54.443	119.405	-0.219	0.086	-0.143	-0.143	-0.296	0.238	0.01	-0.296	-0.219	-0.219
119.605	-64.941	-66.162	-66.284	-66.406	-56.274	-55.298	-55.786	-56.152	-55.664	-54.443	119.605	-0.296	-0.143	-0.296	-0.296	-0.067	0.391	-0.219	-0.143	-0.219	-0.525
119.805	-64.941	-66.162	-66.284	-66.406	-56.396	-55.298	-55.786	-56.152	-55.786	-54.565	119.805	-0.601	-0.296	-0.143	-0.143	0.391	0.162	-0.601	0.086	-0.372	-0.296
120.005	-64.941	-66.162	-66.406	-66.406	-56.396	-55.42	-55.786	-56.152	-55.786	-54.565	120.005	-0.601	-0.143	0.01	0.01	0.62	-0.143	-0.677	0.162	-0.448	0.238
120.205	-64.941	-66.162	-66.406	-66.406	-56.519	-55.42	-55.786	-56.152	-55.786	-54.688	120.205	-0.219	0.086	-0.143	-0.143	0.467	-0.296	-0.525	0.086	-0.372	0.315
120.405	-64.941	-66.162	-66.406	-66.284	-56.519	-55.542	-55.908	-56.274	-55.908	-54.81	120.405	0.01	0.086	-0.296	-0.296	0.238	-0.143	-0.448	-0.143	-0.219	-0.067
120.605	-65.063	-66.162	-66.406	-66.406	-56.641	-55.542	-55.908	-56.396	-55.908	-54.81	120.605	-0.143	-0.143	-0.143	-0.143	0.162	0.086	-0.525	-0.372	-0.219	-0.296
120.805	-65.063	-66.162	-66.406	-66.284	-56.641	-55.542	-56.03	-56.274	-56.03	-54.932	120.805	-0.296	-0.296	0.086	0.086	0.086	0.162	-0.677	-0.525	-0.296	-0.143
121.005	-65.063	-66.162	-66.406	-66.284	-56.641	-55.664	-56.03	-56.396	-56.03	-54.932	121.005	-0.143	-0.143	0.162	0.086	-0.143	0.086	-0.601	-0.753	-0.143	0.086
121.205	-65.063	-66.162	-66.406	-66.406	-56.763	-55.786	-56.03	-56.396	-56.03	-54.932	121.205	0.086	0.01	0.162	-0.143	-0.296	-0.143	-0.219	-0.83	0.086	0.162
121.405	-65.063	-66.162	-66.284	-66.406	-56.763	-55.786	-56.152	-56.519	-56.152	-55.054	121.405	0.086	-0.219	0.162	-0.296	-0.143	-0.296	0.086	-0.372	0.162	0.162
121.605	-65.063	-66.162	-66.284	-66.284	-56.763	-55.786	-56.274	-56.641	-56.152	-55.176	121.605	-0.143	-0.677	0.162	-0.143	0.086	-0.143	0.162	0.162	0.238	0.162
121.805	-64.941	-66.162	-66.406	-66.406	-56.885	-55.908	-56.274	-56.641	-56.274	-55.176	121.805	-0.296	-0.906	0.162	0.086	0.162	0.086	0.238	0.086	0.467	0.162
122.005	-65.063	-66.162	-66.284	-66.406	-57.007	-55.908	-56.274	-56.641	-56.274	-55.298	122.005	-0.219	-0.677	0.086	0.162	0.162	0.162	0.544	-0.219	0.696	0.162
122.205	-65.063	-66.162	-66.284	-66.406	-57.007	-55.908	-56.274	-56.641	-56.274	-55.298	122.205	-0.219	-0.219	-0.143	0.238	0.162	0.162	0.925	-0.143	0.772	0.162
122.405	-64.941	-66.162	-66.284	-66.406	-57.007	-55.908	-56.396	-56.885	-56.396	-55.298	122.405	-0.296	0.01	-0.372	0.467	0.162	0.162	0.925	0.01	0.696	0.238
122.605	-65.063	-66.162	-66.284	-66.406	-57.007	-56.03	-56.396	-56.885	-56.519	-55.42	122.605	-0.143	-0.143	-0.448	0.544	0.162	0.162	0.544	-0.143	0.467	0.467
122.805	-65.063	-66.04	-66.284	-66.406	-57.129	-56.152	-56.396	-56.885	-56.519	-55.542	122.805	0.086	-0.296	-0.448	0.162	0.162	0.162	0.238	-0.296	0.238	0.62
123.005	-65.063	-66.162	-66.284	-66.406	-57.129	-56.152	-56.519	-56.885	-56.641	-55.542	123.005	0.086	-0.143	-0.448	-0.219	0.162	0.162	0.162	-0.143	0.162	0.544
123.205	-65.063	-66.04	-66.284	-66.406	-57.251	-56.152	-56.519	-57.007	-56.641	-55.664	123.205	-0.143	0.086	-0.296	-0.143	0.162	0.162	0.238	0.162	0.162	0.62
123.405	-65.063	-66.04	-66.284	-66.406	-57.251	-56.274	-56.519	-57.129	-56.641	-55.664	123.405	-0.296	0.162	0.162	0.086	0.162	0.162	0.544	0.467	0.162	0.925
123.605	-64.941	-66.04	-66.284	-66.406	-57.251	-56.396	-56.519	-57.129	-56.641	-55.786	123.605	-0.143	0.162	0.544	0.086	0.162	0.238	0.925	0.544	0.238	0.925
123.805	-65.063	-66.04	-66.284	-66.406	-57.373	-56.396	-56.641	-57.129	-56.763	-55.908	123.805	0.086	0.162	0.467	-0.143	0.238	0.467	0.925	0.238	0.544	0.544
124.005	-65.063	-66.162	-66.284	-66.406	-57.373	-56.396	-56.763	-57.251	-56.885	-55.908	124.005	0.162	0.162	0.315	-0.296	0.391	0.62	0.544	0.162	0.925	0.238
124.205	-65.063	-66.04	-66.284	-66.406	-57.373	-56.519	-56.641	-57.373	-56.885	-56.03	124.205	0.162	0.162	0.467	-0.067	0.315	0.467	0.238	0.62	1.001	0.238
124.405	-64.941	-66.162	-66.284	-66.406	-57.495	-56.519	-56.763	-57.373	-56.885	-56.03	124.405	0.162	0.162	0.62	0.467	-0.067	0.238	0.162	0.849	0.849	0.467
124.605	-65.063	-66.04	-66.284	-66.406	-57.495	-56.641	-56.885	-57.373	-57.007	-56.152	124.605	0.162	0.162	0.467	0.925	-0.372	0.086	0.162	0.62	0.696	0.62
124.805	-65.063	-66.04	-66.284	-66.406	-57.495	-56.641	-56.885	-57.373	-57.007	-56.152	124.805	0.162	0.086	0.238	1.001	-0.296	-0.067	0.238	0.544	0.467	0.467
125.005	-65.063	-66.04	-66.284	-66.406	-57.617	-56.641	-56.885	-57.495	-57.129	-56.274	125.005	0.162	-0.067	0.238	0.849	0.238	0.01	0.467	0.62	0.238	0.315
125.205	-64.941	-66.162	-66.284	-66.406	-57.617	-56.641	-57.007	-57.495	-57.129	-56.274	125.205	0.162	0.01	0.467	0.696	0.849	0.391	0.62	0.467	0.162	0.467
125.405	-64.941	-66.162	-66.284	-66.406	-57.617	-56.763	-57.007	-57.617	-57.251	-56.274	125.405	0.162	0.238	0.62	0.467	1.001	0.772	0.544	0.162	0.162	0.62
125.605	-64.941	-66.162	-66.284	-66.406	-57.739	-56.763	-57.129	-57.617	-57.251	-56.519	125.605	0.086	0.086	0.467	0.315	0.925	1.001	0.544	-0.143	0.238	0.467
125.805	-65.063	-66.162	-66.284	-66.406	-57.861	-56.763	-57.129	-57.617	-57.373	-56.519	125.805	-0.143	-0.219	0.238	0.544	1.001	0.925	0.62	-0.296	0.467	0.315
126.005	-64.941	-66.04	-66.284	-66.406	-57.861	-56.885	-57.251	-57.617	-57.373	-56.519	126.005	-0.296	-0.143	0.162	0.925	0.925	0.544	0.467	-0.143	0.62	0.467
126.205	-64.941	-66.162	-66.284	-66.406	-57.861	-57.007	-57.251	-57.739	-57.373	-56.641	126.205	-0.067	0.162	0.238	0.925	0.467	0.238	0.315	0.086	0.467	0.544
126.405	-64.941	-66.04	-66.284	-66.406	-57.983	-57.007	-57.251	-57.739	-57.495	-56.641	126.405	0.391	0.467	0.467	0.467	-0.067	0.162	0.467	0.162	0.238	0.162
126.605	-65.063	-66.162	-66.284	-66.406	-57.983	-57.007	-57.251	-57.739	-57.617	-56.763	126.605	0.62	0.62	0.62	0.01	-0.296	0.162	0.62	0.238	0.162	-0.143
126.805	-65.063	-66.162	-66.406	-66.406	-58.105	-57.129	-57.373	-57.861	-57.617	-56.763	126.805	0.467	0.467	0.467	0.01	-0.219	0.162	0.467	0.544	0.086	0.162
127.005	-65.063	-66.162	-66.406	-66.406	-58.105	-57.129	-57.373	-57.861	-57.617	-56.763	127.005	0.238	0.238	0.162	0.391	-0.219	0.162	0.238	1.001	-0.143	0.544
127.205	-65.063	-66.162	-66.284	-66.406	-58.228	-57.129	-57.495	-57.983	-57.739	-56.885	127.205	0.238	0.238	-0.143	0.62	-0.296	0.086	0.162	1.23	-0.219	0.467
127.405	-65.063	-66.162	-66.284	-66.406	-58.228	-57.251	-57.495	-57.983	-57.739	-56.885	127.405	0.467	0.467	-0.219	0.467	-0.067	-0.143	0.162	1.001	0.238	0.238
127.605	-64.941	-66.162	-66.406	-66.284	-58.228	-57.251	-57.617	-58.105	-57.739	-56.885	127.605	0.696	0.544	0.162	0.315	0.391	-0.219	0.162	0.62	0.925	0.238
127.805	-65.063	-66.04	-66.284	-66.406	-58.35	-57.373	-57.617	-58.105	-57.861	-57.007	127.805	0.772	0.238	0.544	0.391	0.544	0.238	0.162	0.467	1.23	0.391
128.005	-65.063	-66.162	-66.284	-66.406	-58.35	-57.373	-57.617	-58.105	-57.861	-57.129	128.005	0.696	0.162	0.544	0.315	0.162	0.849	0.162	0.315	1.001	0.315
128.205	-64.941	-66.162	-66.406	-66.406	-58.472	-57.495	-57.739	-58.228	-57.983	-57.129	128.205	0.467	0.62	0.62	-0.067	-0.143	0.925	0.162	0.01	0.62	0.01
128.405	-65.063	-66.162	-66.284	-66.406	-58.472	-57.495	-57.739	-58.228	-58.105	-57.129	128.405	0.238	0.849	0.849	-0.296	0.162	0.544	0.162	-0.067	0.467	-0.067
128.605	-64.941	-66.162	-66.284	-66.406	-58.472	-57.495	-57.739	-58.35	-58.105	-57.251	128.605	0.162	0.544	0.62	-0.143	0.544	0.315	0.162	0.086	0.391	0.086
128.805	-65.063	-66.162	-66.284	-66.406	-58.472	-57.495	-57.739	-58.35	-58.105	-57.373	128.805	0.162	0.238	0.086	0.086	0.544	0.544	0.162	0.162	0.315	0.162
129.005	-65.063	-66.162	-66.284	-66.406	-58.594	-57.617	-57.739	-58.35	-58.228	-57.373	129.005	0.162	0.162	0.01	0.238	0.467	0.925	0.162	0.086	0.391	0.162
129.205	-64.941	-66.162	-66.284	-66.406	-58.594	-57.617	-57.861	-58.472	-58.228	-57.373	129.205	0.238	0.162	0.467	0.544	0.391	0.925	0.162	-0.143	0.391	0.162
129.405	-65.063	-66.162	-66.284	-66.406	-58.716	-57.739	-57.861	-58.594	-58.228	-57.495	129.405	0.544	0.162	0.849	0.925	0.315	0.544	0.162	-0.296	0.238	0.162
129.605	-65.063	-66.162	-66.284	-66.406	-58.716	-57.739	-57.861	-58.716	-58.35	-57.617	129.605	0.925	0.238	0.62	0.925	0.391	0.238	0.162	-0.143	0.162	0.162
129.805	-65.063	-66.162	-66.406	-66.528	-58.716	-57.739	-57.983	-58.594	-58.35	-57.617	129.805	0.925	0.544	0.086	0.544	0.391	0.086	0.162	0.086	0.162	0.238
130.005	-65.063	-66.162	-66.406	-66.406	-58.838	-57.739	-57.983	-58.716	-58.35	-57.617	130.005	0.544	0.925	-0.067	0.238	0.238	-0.143	0.162	0.162	0.162	0.544
130.205	-65.063	-66.162	-66.284	-66.406	-58.838	-57.861	-57.983	-58.716	-58.472	-57.739	130.205	0.162	0.925	0.086	0.238	0.086	-0.296	0.238	0.162	0.162	0.925
130.405	-64.941	-66.162	-66.284	-66.406	-58.838	-57.861	-57.983	-58.838	-58.472	-57.861	130.405	-0.219	0.62	0.162	0.544	-0.143	-0.143	0.467	0.162	0.162	0.925
130.605	-64.941	-66.162	-66.406	-66.406	-58.96	-57.983	-57.983	-58.838	-58.472	-57.861	130.605	-0.525	0.62	0.162	0.925	-0.296	0.162	0.696	0.162	0.162	0.544
130.805	-64.941	-66.162	-66.284	-66.406	-58.96	-57.983	-58.105	-58.96	-58.594	-57.861	130.805	-0.219	0.925	0.162	0.925	-0.067	0.467	0.772	0.162	0.238	0.238
131.005	-65.063	-66.162	-66.406	-66.406	-59.082	-58.105	-58.228	-58.96	-58.716	-57.983	131.005	0.467	0.925	0.162	0.544	0.467	0.62	0.696	0.162	0.467	0.162
131.205	-65.063	-66.162	-66.284	-66.406	-58.96	-58.105	-58.228	-58.96	-58.716	-58.105	131.205	0.62	0.544	0.162	0.315	0.925	0.467	0.467	0.086	0.62	0.238
131.405	-65.063	-66.162	-66.406	-66.406	-59.082	-58.105	-58.228	-58.96	-58.716	-58.105	131.405	0.391	0.238	0.162	0.467	0.925	0.238	0.238	-0.143	0.467	0.391
131.605	-65.063	-66.162	-66.406	-66.406	-59.082	-58.228	-58.35	-58.96	-58.838	-58.105	131.605	0.391	0.162	0.238	0.544	0.544	0.162	0.238	-0.372	0.238	0.315
131.805	-65.063	-66.162	-66.406	-66.406	-59.082	-58.228	-58.35	-59.082	-58.838	-58.228	131.805	0.391	0.238	0.544	0.162	0.315	0.086	0.467	-0.448	0.162	0.086
132.005	-65.063	-66.162	-66.284	-66.406	-59.082	-58.228	-58.472	-59.082	-58.838	-58.228	132.005	0.238	0.467	1.001	-0.143	0.467	-0.143	0.544	-0.296	0.086	0.238
132.205	-65.063	-66.162	-66.406	-66.406	-59.204	-58.35	-58.472	-59.204	-58.96	-58.35	132.205	0.162	0.696	1.23	0.162	0.62	-0.296	0.162	0.238	-0.143	0.467
132.405	-64.941	-66.162	-66.406	-66.406	-59.204	-58.35	-58.472	-59.204	-58.96	-58.35	132.405	0.238	0.849	1.001	0.467	0.391	-0.067	-0.219	0.849	-0.296	0.162
132.605	-65.063	-66.162	-66.406	-66.406	-59.326	-58.472	-58.472	-59.204	-59.082	-58.472	132.605	0.544	1.001	0.62	0.162	-0.067	0.315	-0.143	0.925	-0.067	-0.219
132.805	-65.063	-66.162	-66.406	-66.528	-59.326	-58.472	-58.716	-59.204	-59.082	-58.472	132.805	0.925	0.925	0.544	-0.219	-0.296	0.315	0.086	0.544	0.391	-0.143
133.005	-64.941	-66.162	-66.406	-66.406	-59.448	-58.472	-58.716	-59.204	-59.082	-58.472	133.005	0.925	0.544	0.62	-0.067	-0.143	0.01	0.162	0.162	0.62	0.01
133.205	-65.063	-66.162	-66.406	-66.528	-59.448	-58.594	-58.716	-59.326	-59.204	-58.594	133.205	0.544	0.238	0.467	0.391	0.01	-0.067	0.162	-0.143	0.467	-0.143
133.405	-64.941	-66.284	-66.406	-66.528	-59.448	-58.594	-58.716	-59.326	-59.204	-58.594	133.405	0.238	0.162	0.238	0.544	-0.143	0.086	0.086	-0.372	0.238	-0.296
133.605	-64.941	-66.284	-66.406	-66.528	-59.57	-58.594	-58.716	-59.448	-59.204	-58.594	133.605	0.086	0.086	0.162	0.086	-0.296	0.086	-0.143	-0.448	0.162	-0.143
133.805	-64.941	-66.162	-66.284	-66.406	-59.57	-58.594	-58.838	-59.448	-59.326	-58.716	133.805	-0.143	-0.143	0.162	-0.525	-0.219	-0.143	-0.296	-0.372	0.162	0.086
134.005	-64.941	-66.162	-66.406	-66.528	-59.57	-58.716	-58.838	-59.448	-59.326	-58.716	134.005	-0.219	-0.296	0.162	-0.601	-0.219	-0.296	-0.143	-0.219	0.01	0.086
134.205	-64.941	-66.284	-66.406	-66.528	-59.57	-58.716	-58.96	-59.57	-59.448	-58.716	134.205	0.162	-0.143	0.162	-0.219	-0.296	-0.067	0.086	-0.219	-0.448	-0.219
134.405	-64.941	-66.162	-66.406	-66.528	-59.692	-58.838	-58.96	-59.448	-59.448	-58.838	134.405	0.544	0.086	0.238	0.01	-0.143	0.315	0.086	-0.296	-0.753	-0.601
134.605	-64.941	-66.284	-66.406	-66.406	-59.692	-58.838	-59.082	-59.57	-59.448	-58.838	134.605	0.467	0.086	0.467	-0.143	0.086	0.315	-0.143	-0.143	-0.448	-0.601
134.805	-64.941	-66.162	-66.406	-66.528	-59.814	-58.838	-58.96	-59.57	-59.448	-58.838	134.805	0.238	-0.143	0.62	-0.296	0.086	0.01	-0.296	0.086	-0.067	-0.296
135.005	-65.063	-66.162	-66.406	-66.528	-59.814	-58.838	-59.082	-59.692	-59.57	-58.96	135.005	0.162	-0.296	0.467	-0.143	-0.143	-0.067	-0.143	0.162	-0.219	-0.296
135.205	-64.941	-66.162	-66.406	-66.528	-59.814	-58.96	-59.082	-59.814	-59.692	-58.96	135.205	0.162	-0.143	0.238	0.086	-0.296	0.01	0.086	0.086	-0.601	-0.601
135.405	-64.941	-66.162	-66.406	-66.528	-59.937	-58.96	-59.082	-59.814	-59.692	-58.96	135.405	0.162	0.01	0.086	0.162	-0.143	-0.219	0.086	-0.143	-0.601	-0.601
135.605	-64.941	-66.162	-66.406	-66.528	-59.937	-59.082	-59.204	-59.814	-59.692	-59.082	135.605	0.086	-0.143	-0.143	0.086	0.01	-0.677	-0.219	-0.372	-0.219	-0.296
135.805	-65.063	-66.162	-66.406	-66.528	-59.937	-58.96	-59.204	-59.814	-59.692	-59.082	135.805	-0.143	-0.296	-0.296	-0.143	-0.143	-0.83	-0.525	-0.448	0.01	-0.219
136.005	-65.063	-66.162	-66.406	-66.528	-59.937	-59.082	-59.204	-59.814	-59.814	-59.204	136.005	-0.296	-0.143	-0.219	-0.372	-0.296	-0.372	-0.296	-0.448	-0.143	-0.296
136.205	-65.063	-66.162	-66.406	-66.528	-59.937	-59.082	-59.204	-59.937	-59.937	-59.204	136.205	-0.219	0.01	-0.219	-0.448	-0.143	0.162	0.162	-0.448	-0.372	-0.219
136.405	-65.063	-66.162	-66.406	-66.528	-60.059	-59.204	-59.204	-59.937	-59.937	-59.204	136.405	-0.296	-0.219	-0.372	-0.372	0.086	0.01	0.01	-0.372	-0.448	-0.219
136.605	-65.063	-66.162	-66.406	-66.528	-60.059	-59.204	-59.326	-60.059	-59.937	-59.204	136.605	-0.677	-0.601	-0.525	-0.143	0.086	-0.525	-0.601	-0.143	-0.448	-0.372
136.805	-65.063	-66.162	-66.406	-66.528	-60.059	-59.204	-59.326	-60.059	-59.937	-59.326	136.805	-0.906	-0.601	-0.753	0.086	-0.219	-0.601	-0.906	0.01	-0.448	-0.448
137.005	-65.063	-66.162	-66.406	-66.406	-60.181	-59.204	-59.326	-60.059	-59.937	-59.326	137.005	-0.677	-0.219	-0.83	0.086	-0.601	-0.296	-0.753	-0.143	-0.296	-0.448
137.205	-64.941	-66.162	-66.528	-66.406	-60.181	-59.326	-59.326	-60.181	-60.059	-59.448	137.205	-0.219	0.01	-0.448	-0.143	-0.677	-0.296	-0.525	-0.296	0.238	-0.448
137.405	-65.063	-66.04	-66.406	-66.528	-60.181	-59.326	-59.326	-60.059	-60.181	-59.448	137.405	0.086	-0.143	-0.143	-0.296	-0.601	-0.525	-0.448	-0.219	0.772	-0.372
137.606	-65.063	-66.162	-66.406	-66.528	-60.181	-59.326	-59.448	-60.059	-60.181	-59.448	137.606	0.162	-0.296	-0.372	-0.219	-0.677	-0.296	-0.448	-0.219	0.544	-0.219
137.806	-65.063	-66.162	-66.406	-66.528	-60.303	-59.448	-59.448	-60.181	-60.059	-59.57	137.806	0.162	-0.143	-0.525	-0.219	-0.601	0.238	-0.372	-0.296	-0.219	-0.219
138.006	-65.063	-66.162	-66.528	-66.528	-60.303	-59.448	-59.57	-60.181	-60.181	-59.57	138.006	0.086	0.086	-0.296	-0.296	-0.219	0.315	-0.143	-0.143	-0.525	-0.296
138.206	-65.063	-66.162	-66.528	-66.528	-60.303	-59.448	-59.57	-60.181	-60.181	-59.692	138.206	-0.219	0.162	-0.296	-0.143	0.01	-0.143	0.01	0.086	-0.296	-0.143
138.406	-65.063	-66.162	-66.406	-66.406	-60.425	-59.57	-59.57	-60.303	-60.303	-59.692	138.406	-0.677	0.162	-0.601	0.162	-0.143	-0.601	-0.143	0.086	-0.296	0.086
138.606	-64.941	-66.162	-66.406	-66.528	-60.425	-59.57	-59.692	-60.303	-60.303	-59.692	138.606	-0.83	0.162	-0.601	0.467	-0.372	-0.601	-0.296	-0.143	-0.601	0.162
138.806	-65.063	-66.162	-66.406	-66.528	-60.547	-59.57	-59.692	-60.425	-60.303	-59.814	138.806	-0.372	0.086	-0.219	0.62	-0.448	-0.296	-0.143	-0.372	-0.601	0.162
139.006	-65.063	-66.162	-66.406	-66.528	-60.425	-59.57	-59.814	-60.303	-60.303	-59.814	139.006	0.162	-0.143	0.086	0.467	-0.448	-0.219	-0.067	-0.448	-0.219	0.086
139.206	-65.063	-66.162	-66.406	-66.406	-60.547	-59.692	-59.692	-60.181	-60.303	-59.814	139.206	0.01	-0.296	0.162	0.238	-0.448	-0.296	-0.448	-0.448	0.01	-0.143
139.406	-65.063	-66.162	-66.406	-66.406	-60.547	-59.814	-59.814	-59.937	-60.547	-59.937	139.406	-0.525	-0.143	0.162	0.162	-0.372	-0.143	-0.753	-0.448	-0.143	-0.296
139.606	-64.941	-66.162	-66.406	-66.528	-60.547	-59.814	-59.814	-59.692	-60.425	-59.937	139.606	-0.601	0.086	0.162	0.162	-0.143	0.01	-0.448	-0.448	-0.296	-0.143
139.806	-64.941	-66.162	-66.406	-66.406	-60.547	-59.814	-59.937	-59.326	-60.547	-59.937	139.806	-0.219	0.162	0.162	0.162	0.01	-0.143	0.01	-0.448	-0.143	0.086
140.006	-65.063	-66.162	-66.528	-66.406	-60.669	-59.814	-59.937	-59.082	-60.547	-60.059	140.006	0.086	0.162	0.162	0.162	-0.219	-0.296	0.086	-0.372	0.086	0.162
140.206	-65.063	-66.162	-66.406	-66.528	-60.669	-59.814	-59.937	-58.594	-60.547	-60.059	140.206	0.162	0.162	0.162	0.086	-0.601	-0.143	-0.219	-0.219	0.162	0.086
140.406	-64.941	-66.162	-66.406	-66.528	-60.791	-59.937	-60.059	-58.35	-60.669	-60.181	140.406	0.162	0.162	0.162	-0.143	-0.601	0.086	-0.601	-0.296	0.162	-0.219
140.606	-65.063	-66.162	-66.406	-66.528	-60.791	-59.937	-60.059	-57.739	-60.669	-60.059	140.606	0.162	0.162	0.162	-0.296	-0.219	0.162	-0.677	-0.601	0.162	-0.601
140.806	-65.063	-66.162	-66.284	-66.528	-60.791	-59.937	-60.181	-57.251	-60.791	-60.181	140.806	0.238	0.086	0.086	-0.143	0.086	0.086	-0.525	-0.601	0.086	-0.525
141.006	-64.941	-66.162	-66.406	-66.406	-60.791	-60.059	-60.181	-56.763	-60.791	-60.181	141.006	0.391	-0.143	-0.219	0.01	0.162	-0.143	-0.372	-0.296	-0.219	0.086
141.206	-65.063	-66.162	-66.406	-66.406	-60.913	-60.059	-60.181	-56.152	-60.791	-60.181	141.206	0.315	-0.296	-0.601	-0.219	0.162	-0.296	-0.143	-0.296	-0.601	0.62
141.406	-65.063	-66.162	-66.406	-66.528	-60.913	-60.181	-60.181	-55.542	-60.791	-60.303	141.406	0.01	-0.143	-0.601	-0.677	0.086	-0.219	0.086	-0.601	-0.525	0.772
141.606	-64.941	-66.162	-66.406	-66.528	-60.913	-60.181	-60.303	-55.054	-60.913	-60.303	141.606	-0.143	0.086	-0.219	-0.906	-0.143	-0.296	0.086	-0.601	0.086	0.772
141.806	-64.941	-66.162	-66.406	-66.406	-61.035	-60.181	-60.181	-54.565	-60.913	-60.425	141.806	-0.296	0.162	0.086	-0.677	-0.296	-0.601	-0.143	-0.219	0.544	0.849
142.006	-65.063	-66.162	-66.406	-66.528	-60.913	-60.181	-60.181	-53.955	-60.913	-60.303	142.006	-0.601	0.162	0.162	-0.219	-0.143	-0.601	-0.219	0.086	0.391	1.001
142.206	-65.063	-66.162	-66.406	-66.528	-60.913	-60.181	-60.181	-53.345	-61.035	-60.425	142.206	-0.601	0.162	0.162	0.086	0.01	-0.219	0.162	0.162	-0.067	0.925
142.406	-65.063	-66.162	-66.406	-66.406	-61.035	-60.303	-60.303	-52.856	-61.035	-60.547	142.406	-0.219	0.086	0.162	0.162	-0.143	0.086	0.544	0.238	-0.296	0.544
142.606	-65.063	-66.04	-66.406	-66.406	-61.157	-60.303	-60.303	-52.246	-60.913	-60.547	142.606	0.086	-0.219	0.162	0.162	-0.219	0.162	0.467	0.467	-0.143	0.238
142.806	-64.941	-66.04	-66.406	-66.406	-61.035	-60.303	-60.303	-51.636	-60.669	-60.547	142.806	0.086	-0.601	0.162	0.162	0.162	0.238	0.238	0.544	0.01	0.162
143.006	-65.063	-66.162	-66.406	-66.406	-61.157	-60.303	-60.303	-51.025	-60.425	-60.547	143.006	-0.143	-0.601	0.162	0.162	0.544	0.467	0.162	0.162	-0.143	0.162
143.206	-65.063	-66.04	-66.406	-66.406	-61.035	-60.303	-60.425	-50.537	-60.059	-60.669	143.206	-0.219	-0.219	0.238	0.162	0.467	0.62	0.162	-0.143	-0.219	0.162
143.406	-64.941	-66.04	-66.406	-66.406	-61.157	-60.303	-60.425	-49.805	-59.692	-60.669	143.406	0.162	0.086	0.467	0.162	0.238	0.391	0.162	0.162	0.238	0.238
143.606	-64.941	-66.162	-66.406	-66.528	-61.279	-60.425	-60.425	-49.194	-59.326	-60.669	143.606	0.544	0.238	0.62	0.238	0.162	-0.067	0.238	0.544	0.772	0.467
143.806	-64.941	-66.162	-66.406	-66.528	-61.279	-60.425	-60.425	-48.584	-58.96	-60.669	143.806	0.467	0.467	0.544	0.467	0.162	-0.296	0.544	0.467	0.62	0.62
144.006	-65.063	-66.162	-66.406	-66.528	-61.279	-60.425	-60.547	-48.096	-58.472	-60.791	144.006	0.238	0.62	0.62	0.62	0.162	-0.143	0.925	0.315	0.086	0.467
144.206	-64.941	-66.162	-66.406	-66.528	-61.279	-60.669	-60.547	-47.363	-57.861	-60.791	144.206	0.086	0.467	0.925	0.544	0.162	0.086	0.925	0.544	0.01	0.315
144.406	-65.063	-66.162	-66.406	-66.528	-61.279	-60.669	-60.547	-46.875	-57.495	-60.791	144.406	-0.143	0.238	0.925	0.544	0.238	0.238	0.467	0.925	0.391	0.544
144.606	-65.063	-66.162	-66.406	-66.406	-61.279	-60.547	-60.669	-46.143	-56.885	-60.913	144.606	-0.296	0.162	0.544	0.62	0.467	0.467	-0.067	0.925	0.62	0.925
144.806	-65.063	-66.162	-66.406	-66.406	-61.401	-60.547	-60.547	-45.532	-56.274	-60.913	144.806	-0.143	0.162	0.315	0.467	0.62	0.62	-0.296	0.544	0.467	0.925
145.006	-65.063	-66.162	-66.406	-66.528	-61.401	-60.669	-60.669	-44.922	-55.786	-60.913	145.006	0.086	0.162	0.544	0.238	0.467	0.467	-0.067	0.315	0.315	0.544
145.206	-65.063	-66.162	-66.406	-66.528	-61.401	-60.669	-60.669	-44.312	-55.298	-61.035	145.206	0.238	0.162	0.925	0.238	0.238	0.315	0.391	0.467	0.467	0.238
145.406	-64.941	-66.162	-66.406	-66.528	-61.523	-60.669	-60.669	-43.701	-54.688	-61.157	145.406	0.467	0.162	0.925	0.467	0.086	0.467	0.62	0.62	0.544	0.162
145.606	-64.941	-66.162	-66.406	-66.406	-61.401	-60.669	-60.791	-43.091	-54.077	-61.157	145.606	0.62	0.162	0.62	0.62	-0.143	0.62	0.544	0.467	0.162	0.162
145.806	-65.063	-66.162	-66.284	-66.406	-61.523	-60.791	-60.791	-42.48	-53.467	-61.157	145.806	0.467	0.162	0.62	0.467	-0.296	0.467	0.544	0.238	-0.219	0.162
146.006	-65.063	-66.162	-66.406	-66.406	-61.523	-60.791	-60.791	-41.626	-52.856	-61.157	146.006	0.238	0.162	0.925	0.315	-0.067	0.315	0.62	0.162	-0.143	0.162
146.206	-65.063	-66.162	-66.406	-66.528	-61.646	-60.791	-60.791	-41.016	-52.368	-61.279	146.206	0.238	0.238	0.925	0.391	0.391	0.467	0.467	0.162	0.086	0.238
146.406	-65.063	-66.162	-66.284	-66.406	-61.646	-60.791	-60.913	-40.283	-51.758	-61.279	146.406	0.544	0.544	0.544	0.391	0.62	0.62	0.238	0.162	0.162	0.391
146.606	-65.063	-66.162	-66.284	-66.406	-61.646	-60.913	-60.913	-39.551	-51.27	-61.279	146.606	0.925	0.925	0.238	0.315	0.467	0.467	0.162	0.162	0.238	0.315
146.806	-64.941	-66.162	-66.284	-66.528	-61.646	-60.913	-60.913	-38.696	-50.537	-61.401	146.806	0.849	1.001	0.162	0.391	0.315	0.315	0.162	0.162	0.467	0.086
147.006	-64.941	-66.162	-66.284	-66.528	-61.768	-60.913	-60.913	-37.964	-49.927	-61.401	147.006	0.238	0.849	0.238	0.467	0.467	0.467	0.238	0.238	0.62	0.238
147.206	-65.063	-66.162	-66.284	-66.528	-61.646	-61.035	-61.035	-36.987	-49.316	-61.401	147.206	-0.143	0.772	0.467	0.544	0.62	0.62	0.467	0.467	0.467	0.544
147.406	-65.063	-66.162	-66.284	-66.528	-61.768	-61.035	-61.035	-36.011	-48.706	-61.401	147.406	0.162	0.772	0.62	0.62	0.467	0.544	0.62	0.62	0.238	0.467
147.606	-65.063	-66.162	-66.284	-66.528	-61.768	-61.035	-61.035	-34.912	-48.096	-61.523	147.606	0.544	0.696	0.544	0.467	0.315	0.544	0.467	0.467	0.162	0.238
147.806	-65.063	-66.162	-66.284	-66.528	-61.89	-61.035	-61.035	-33.569	-47.485	-61.523	147.806	0.467	0.467	0.544	0.238	0.467	0.62	0.238	0.238	0.162	0.162
148.006	-64.941	-66.162	-66.284	-66.528	-61.89	-61.035	-61.035	-32.104	-46.997	-61.401	148.006	0.238	0.238	0.544	0.162	0.544	0.467	0.162	0.238	0.162	0.162
148.206	-64.941	-66.162	-66.284	-66.528	-61.89	-61.035	-61.157	-30.273	-46.387	-61.279	148.206	0.162	0.162	0.162	0.086	0.162	0.238	0.238	0.391	0.162	0.162
148.406	-64.941	-66.162	-66.406	-66.528	-61.89	-61.157	-61.035	-27.588	-45.776	-60.913	148.406	0.162	0.162	-0.143	-0.143	-0.143	0.238	0.467	0.315	0.238	0.086
148.606	-65.063	-66.162	-66.406	-66.528	-61.89	-61.157	-61.157	-23.804	-45.166	-60.669	148.606	0.086	0.086	0.162	-0.296	0.162	0.467	0.62	0.01	0.467	-0.143
148.806	-64.941	-66.162	-66.406	-66.528	-62.012	-61.157	-61.157	-17.822	-44.556	-60.303	148.806	-0.143	-0.219	0.544	-0.143	0.62	0.62	0.467	-0.067	0.62	-0.296
149.006	-64.941	-66.162	-66.406	-66.65	-62.012	-61.157	-61.279	-8.301	-43.945	-59.937	149.006	-0.296	-0.601	0.467	0.162	0.772	0.467	0.238	0.086	0.467	-0.143
149.206	-64.941	-66.162	-66.406	-66.528	-62.012	-61.279	-61.279	2.808	-43.335	-59.448	149.206	-0.067	-0.601	0.238	0.467	0.696	0.238	0.162	0.162	0.162	0.162
149.406	-64.941	-66.162	-66.406	-66.65	-62.134	-61.279	-61.157	10.986	-42.725	-58.96	149.406	0.391	-0.143	0.238	0.62	0.544	0.162	0.162	0.162	-0.143	0.467
149.606	-64.941	-66.162	-66.406	-66.65	-62.012	-61.279	-61.279	15.137	-42.114	-58.594	149.606	0.62	0.391	0.467	0.544	0.544	0.162	0.238	0.162	-0.296	0.62
149.806	-64.941	-66.162	-66.528	-66.65	-62.134	-61.401	-61.279	16.846	-41.504	-57.983	149.806	0.467	0.62	0.62	0.544	0.62	0.162	0.391	0.162	-0.143	0.467
150.006	-64.941	-66.162	-66.406	-66.65	-62.134	-61.401	-61.279	17.7	-40.771	-57.495	150.006	0.238	0.467	0.467	0.62	0.467	0.162	0.315	0.162	0.086	0.238
150.206	-64.941	-66.162	-66.528	-66.528	-62.134	-61.401	-61.401	17.944	-40.161	-56.885	150.206	0.162	0.238	0.315	0.467	0.238	0.162	0.01	0.238	0.162	0.162
150.406	-64.941	-66.162	-66.406	-66.528	-62.134	-61.401	-61.279	18.066	-39.429	-56.274	150.406	0.162	0.162	0.544	0.238	0.162	0.162	-0.067	0.467	0.162	0.162
150.606	-65.063	-66.162	-66.528	-66.65	-62.256	-61.401	-61.401	18.066	-38.574	-55.664	150.606	0.238	0.162	0.925	0.162	0.238	0.162	0.086	0.62	0.162	0.162
150.806	-65.063	-66.162	-66.528	-66.65	-62.256	-61.401	-61.401	18.066	-37.964	-55.054	150.806	0.467	0.238	0.925	0.162	0.467	0.162	0.238	0.391	0.162	0.162
151.006	-65.063	-66.162	-66.406	-66.528	-62.256	-61.401	-61.401	17.944	-37.109	-54.443	151.006	0.62	0.467	0.544	0.162	0.62	0.086	0.467	-0.067	0.162	0.162
151.206	-64.941	-66.162	-66.406	-66.65	-62.256	-61.523	-61.523	17.822	-36.133	-53.955	151.206	0.544	0.62	0.238	0.162	0.467	-0.143	0.62	-0.296	0.238	0.162
151.406	-64.941	-66.284	-66.406	-66.528	-62.256	-61.523	-61.523	17.7	-35.156	-53.345	151.406	0.544	0.467	0.162	0.238	0.238	-0.296	0.467	-0.143	0.467	0.162
151.606	-65.063	-66.162	-66.406	-66.528	-62.256	-61.523	-61.523	17.456	-34.058	-52.734	151.606	0.62	0.238	0.086	0.467	0.162	-0.143	0.238	0.01	0.62	0.162
151.806	-65.063	-66.284	-66.406	-66.528	-62.378	-61.523	-61.646	17.334	-32.837	-52.124	151.806	0.467	0.162	-0.143	0.62	0.238	0.086	0.162	-0.219	0.391	0.086
152.006	-65.063	-66.284	-66.528	-66.528	-62.378	-61.646	-61.646	17.09	-31.372	-51.514	152.006	0.238	0.162	-0.296	0.391	0.544	0.162	0.162	-0.601	-0.067	-0.143
152.206	-65.063	-66.284	-66.406	-66.528	-62.378	-61.646	-61.646	16.968	-29.663	-50.903	152.206	0.162	0.162	-0.143	-0.067	0.925	0.162	0.162	-0.601	-0.296	-0.296
152.406	-64.941	-66.162	-66.406	-66.528	-62.378	-61.646	-61.646	16.724	-27.344	-50.293	152.406	0.238	0.162	0.086	-0.296	0.849	0.162	0.086	-0.296	-0.219	-0.219
152.606	-64.941	-66.162	-66.406	-66.528	-62.5	-61.646	-61.646	16.602	-24.17	-49.683	152.606	0.544	0.238	0.162	-0.067	0.238	0.162	-0.143	-0.296	-0.296	-0.219
152.806	-64.941	-66.284	-66.406	-66.528	-62.5	-61.768	-61.768	16.357	-19.653	-49.072	152.806	1.001	0.467	0.162	0.315	-0.219	0.162	-0.296	-0.677	-0.677	-0.296
153.006	-65.063	-66.162	-66.406	-66.528	-62.5	-61.768	-61.768	16.235	-12.939	-48.462	153.006	1.23	0.62	0.162	0.315	-0.143	0.162	-0.219	-0.906	-0.982	-0.143
153.206	-65.063	-66.162	-66.406	-66.65	-62.622	-61.768	-61.768	15.991	-4.517	-47.852	153.206	1.001	0.467	0.162	0.086	0.01	0.162	-0.296	-0.753	-1.059	0.086
153.406	-65.063	-66.284	-66.406	-66.528	-62.5	-61.768	-61.768	15.747	3.174	-47.241	153.406	0.467	0.238	0.162	0.238	-0.143	0.162	-0.601	-0.601	-1.059	0.086
153.606	-65.063	-66.284	-66.406	-66.528	-62.622	-61.89	-61.768	15.625	8.423	-46.631	153.606	-0.067	0.162	0.162	0.467	-0.296	0.162	-0.601	-0.677	-0.982	-0.219
153.806	-65.063	-66.162	-66.406	-66.528	-62.5	-61.89	-61.89	15.503	11.108	-46.021	153.806	-0.296	0.086	0.162	0.162	-0.143	0.086	-0.219	-0.601	-0.753	-0.677
154.006	-64.941	-66.284	-66.406	-66.528	-62.5	-61.89	-61.89	15.259	12.451	-45.532	154.006	-0.143	-0.143	0.162	-0.219	0.086	-0.143	0.086	-0.296	-0.525	-0.982
154.206	-64.941	-66.162	-66.406	-66.528	-62.622	-61.89	-61.89	15.137	13.062	-44.922	154.206	0.086	-0.219	0.162	-0.143	0.162	-0.296	0.086	-0.296	-0.448	-1.059
154.406	-65.063	-66.162	-66.406	-66.528	-62.622	-61.89	-61.89	14.893	13.306	-44.312	154.406	0.162	0.162	0.162	0.01	0.162	-0.143	-0.143	-0.677	-0.525	-1.059
154.606	-65.063	-66.162	-66.406	-66.528	-62.622	-62.012	-61.89	14.648	13.428	-43.701	154.606	0.162	0.544	0.162	-0.067	0.162	0.01	-0.296	-0.906	-0.677	-0.982
154.806	-64.941	-66.162	-66.406	-66.528	-62.744	-62.012	-62.012	14.526	13.55	-42.969	154.806	0.162	0.391	0.086	0.01	0.162	-0.219	-0.219	-0.753	-0.677	-0.677
155.006	-64.941	-66.162	-66.284	-66.65	-62.622	-62.012	-62.012	14.282	13.672	-42.358	155.006	0.086	-0.067	-0.143	0.238	0.162	-0.601	-0.296	-0.601	-0.601	-0.219
155.206	-65.063	-66.162	-66.284	-66.528	-62.744	-62.012	-62.012	14.16	13.672	-41.626	155.206	-0.143	-0.296	-0.296	0.086	0.162	-0.601	-0.601	-0.753	-0.677	0.01
155.406	-64.941	-66.162	-66.406	-66.528	-62.744	-62.134	-62.012	13.916	13.794	-41.016	155.406	-0.296	-0.143	-0.143	-0.296	0.162	-0.296	-0.601	-0.906	-0.677	-0.219
155.606	-64.941	-66.162	-66.406	-66.528	-62.744	-62.134	-62.012	13.794	13.794	-40.283	155.606	-0.219	0.086	0.162	-0.448	0.162	-0.219	-0.296	-0.753	-0.525	-0.601
155.806	-65.063	-66.162	-66.406	-66.528	-62.866	-62.134	-62.134	13.55	13.916	-39.551	155.806	-0.219	0.162	0.391	-0.372	0.162	-0.296	-0.219	-0.601	-0.448	-0.677
156.006	-65.063	-66.162	-66.406	-66.528	-62.866	-62.134	-62.134	13.306	13.794	-38.94	156.006	-0.372	0.238	0.238	-0.219	0.162	-0.143	-0.296	-0.753	-0.525	-0.525
156.206	-65.063	-66.162	-66.406	-66.65	-62.866	-62.134	-62.134	13.184	13.794	-38.086	156.206	-0.448	0.467	-0.296	-0.296	0.086	0.086	-0.143	-0.906	-0.753	-0.448
156.406	-65.063	-66.162	-66.406	-66.528	-62.866	-62.134	-62.134	12.939	13.794	-37.231	156.406	-0.372	0.544	-0.525	-0.601	-0.067	0.086	0.086	-0.677	-0.906	-0.448
156.606	-64.941	-66.162	-66.406	-66.528	-62.866	-62.134	-62.134	12.695	13.672	-36.377	156.606	-0.219	0.086	-0.296	-0.677	0.01	-0.143	0.086	-0.296	-0.677	-0.372
156.806	-64.941	-66.162	-66.406	-66.528	-62.866	-62.256	-62.134	12.451	13.672	-35.4	156.806	-0.219	-0.525	-0.219	-0.525	0.238	-0.296	-0.219	-0.296	-0.296	-0.219
157.006	-64.941	-66.284	-66.406	-66.65	-62.988	-62.256	-62.134	12.329	13.55	-34.302	157.006	-0.296	-0.601	-0.296	-0.448	0.01	-0.219	-0.601	-0.677	-0.296	-0.219
157.206	-64.941	-66.162	-66.406	-66.528	-62.866	-62.256	-62.134	12.085	13.428	-33.081	157.206	-0.143	-0.296	-0.143	-0.448	-0.525	-0.219	-0.525	-0.906	-0.601	-0.372
157.406	-64.941	-66.284	-66.528	-66.65	-62.988	-62.256	-62.256	11.963	13.428	-31.86	157.406	0.086	-0.296	0.01	-0.372	-0.601	-0.296	0.01	-0.753	-0.601	-0.448
157.606	-64.941	-66.284	-66.406	-66.528	-62.988	-62.256	-62.134	11.719	13.306	-30.151	157.606	0.162	-0.601	-0.219	-0.143	-0.296	-0.067	0.238	-0.601	-0.219	-0.372
157.806	-64.941	-66.284	-66.528	-66.528	-62.988	-62.256	-62.256	11.597	13.306	-28.076	157.806	0.086	-0.601	-0.677	0.086	-0.219	0.391	0.01	-0.753	0.01	-0.143
158.006	-64.941	-66.162	-66.528	-66.528	-62.988	-62.378	-62.256	11.353	13.062	-25.146	158.006	-0.143	-0.219	-0.906	0.162	-0.296	0.62	-0.067	-0.982	-0.219	0.01
158.206	-65.063	-66.284	-66.406	-66.528	-63.11	-62.378	-62.256	11.23	13.062	-21.24	158.206	-0.296	0.01	-0.677	0.162	-0.219	0.391	0.086	-0.982	-0.601	-0.219
158.406	-65.063	-66.284	-66.406	-66.528	-63.11	-62.378	-62.256	10.986	12.939	-15.259	158.406	-0.219	-0.219	-0.219	0.238	-0.296	-0.143	0.086	-0.753	-0.677	-0.677
158.606	-64.941	-66.284	-66.406	-66.528	-63.11	-62.378	-62.256	10.742	12.817	-7.202	158.606	-0.219	-0.601	0.01	0.467	-0.677	-0.601	-0.219	-0.601	-0.601	-0.906
158.806	-64.941	-66.162	-66.406	-66.528	-63.11	-62.378	-62.378	10.62	12.695	0.977	158.806	-0.296	-0.601	-0.143	0.62	-0.982	-0.601	-0.601	-0.753	-0.677	-0.677
159.006	-64.941	-66.284	-66.406	-66.528	-63.11	-62.378	-62.378	10.376	12.573	7.08	159.006	-0.143	-0.296	-0.296	0.467	-0.982	-0.296	-0.677	-0.982	-0.677	-0.219
159.206	-64.941	-66.162	-66.406	-66.528	-63.232	-62.378	-62.5	10.132	12.573	10.254	159.206	0.086	-0.296	-0.219	0.238	-0.677	-0.219	-0.601	-0.982	-0.525	0.086
159.406	-64.941	-66.162	-66.406	-66.528	-63.232	-62.5	-62.5	9.888	12.451	11.841	159.406	0.162	-0.601	-0.296	0.162	-0.219	-0.372	-0.753	-0.677	-0.448	0.086
159.606	-65.063	-66.162	-66.406	-66.528	-63.11	-62.5	-62.5	9.766	12.329	12.695	159.606	0.162	-0.601	-0.677	0.086	0.01	-0.448	-0.906	-0.296	-0.525	-0.219
159.806	-65.063	-66.162	-66.406	-66.406	-63.232	-62.5	-62.5	9.521	12.207	13.062	159.806	0.162	-0.296	-0.906	-0.143	-0.219	-0.296	-0.601	-0.296	-0.753	-0.677
160.006	-64.941	-66.284	-66.406	-66.406	-63.232	-62.5	-62.5	9.399	12.085	13.306	160.006	0.086	-0.296	-0.677	-0.296	-0.601	0.162	0.01	-0.601	-0.906	-0.906
160.206	-65.063	-66.284	-66.406	-66.528	-63.232	-62.5	-62.5	9.155	11.963	13.428	160.206	-0.219	-0.601	-0.219	-0.143	-0.601	0.467	0.162	-0.677	-0.677	-0.677
160.406	-65.063	-66.162	-66.406	-66.528	-63.232	-62.622	-62.5	8.911	11.841	13.55	160.406	-0.601	-0.601	0.086	0.086	-0.219	0.162	-0.296	-0.525	-0.219	-0.296
160.606	-65.063	-66.162	-66.406	-66.406	-63.232	-62.622	-62.622	8.789	11.719	13.672	160.606	-0.601	-0.219	0.086	0.162	0.01	-0.219	-0.525	-0.372	0.01	-0.296
160.806	-64.941	-66.162	-66.406	-66.528	-63.232	-62.622	-62.622	8.545	11.597	13.794	160.806	-0.219	0.01	-0.219	0.162	-0.143	-0.219	-0.219	-0.143	-0.219	-0.601
161.006	-65.063	-66.162	-66.406	-66.528	-63.354	-62.622	-62.622	8.301	11.475	13.794	161.006	0.086	-0.219	-0.677	0.162	-0.296	-0.143	0.086	0.086	-0.601	-0.601
161.206	-65.063	-66.162	-66.406	-66.528	-63.232	-62.744	-62.622	8.057	11.353	13.916	161.206	0.162	-0.601	-0.982	0.162	-0.143	0.01	0.162	0.086	-0.601	-0.296
161.406	-65.063	-66.162	-66.406	-66.528	-63.354	-62.744	-62.622	7.812	11.23	13.916	161.406	0.162	-0.601	-0.982	0.162	0.01	0.315	0.162	-0.219	-0.219	-0.296
161.606	-64.941	-66.162	-66.406	-66.528	-63.354	-62.744	-62.622	7.69	11.108	13.916	161.606	0.162	-0.219	-0.677	0.162	-0.143	0.315	0.162	-0.601	0.01	-0.677
161.806	-65.063	-66.284	-66.406	-66.528	-63.354	-62.744	-62.622	7.446	10.986	13.916	161.806	0.162	0.01	-0.219	0.086	-0.296	-0.067	0.162	-0.601	-0.143	-0.906
162.006	-64.941	-66.162	-66.406	-66.528	-63.354	-62.744	-62.622	7.202	10.742	13.916	162.006	0.162	-0.143	0.01	-0.219	-0.219	-0.296	0.162	-0.219	-0.296	-0.677
162.206	-65.063	-66.284	-66.406	-66.65	-63.477	-62.744	-62.622	6.958	10.742	14.038	162.206	0.238	-0.296	-0.143	-0.601	-0.296	-0.143	0.238	0.086	-0.219	-0.296
162.406	-64.941	-66.162	-66.406	-66.65	-63.354	-62.744	-62.622	6.714	10.498	14.038	162.406	0.467	-0.143	-0.296	-0.601	-0.601	0.086	0.467	0.162	-0.296	-0.296
162.607	-64.941	-66.162	-66.406	-66.65	-63.477	-62.744	-62.744	6.47	10.376	13.916	162.607	0.544	0.086	-0.143	-0.219	-0.525	0.162	0.62	0.086	-0.677	-0.601
162.807	-65.063	-66.284	-66.406	-66.528	-63.354	-62.744	-62.744	6.226	10.254	13.916	162.807	0.162	0.162	0.01	0.086	0.086	0.162	0.467	-0.143	-0.906	-0.601
163.007	-65.063	-66.162	-66.406	-66.65	-63.477	-62.866	-62.744	5.981	10.01	13.794	163.007	-0.219	0.162	-0.219	0.162	0.544	0.238	0.238	-0.296	-0.677	-0.219
163.207	-64.941	-66.162	-66.406	-66.528	-63.477	-62.866	-62.744	5.737	9.888	13.794	163.207	-0.143	0.162	-0.601	0.162	0.467	0.544	0.162	-0.143	-0.219	0.01
163.407	-65.063	-66.162	-66.406	-66.528	-63.477	-62.866	-62.744	5.493	9.644	13.672	163.407	0.086	0.162	-0.601	0.162	0.238	0.925	0.162	0.086	0.01	-0.143
163.607	-64.941	-66.162	-66.406	-66.528	-63.477	-62.866	-62.866	5.249	9.521	13.794	163.607	0.086	0.162	-0.219	0.086	0.162	0.925	0.162	0.162	-0.143	-0.296
163.807	-64.941	-66.162	-66.406	-66.528	-63.477	-62.866	-62.866	5.005	9.399	13.672	163.807	-0.219	0.162	0.086	-0.143	0.162	0.62	0.086	0.162	-0.296	-0.143
164.007	-64.941	-66.284	-66.406	-66.528	-63.477	-62.988	-62.866	4.761	9.277	13.55	164.007	-0.601	0.238	0.162	-0.219	0.162	0.62	-0.143	0.086	-0.143	0.086
164.207	-65.063	-66.162	-66.406	-66.528	-63.599	-62.988	-62.866	4.517	9.033	13.428	164.207	-0.601	0.467	0.162	0.162	0.162	0.925	-0.296	-0.067	0.086	0.162
164.407	-65.063	-66.162	-66.406	-66.528	-63.599	-62.988	-62.866	4.15	8.911	13.428	164.407	-0.219	0.62	0.162	0.544	0.238	0.925	-0.067	0.01	0.162	0.162
164.607	-64.941	-66.162	-66.406	-66.528	-63.599	-62.988	-62.866	3.906	8.667	13.306	164.607	0.086	0.467	0.086	0.467	0.467	0.544	0.391	0.315	0.162	0.086
164.807	-65.063	-66.162	-66.406	-66.528	-63.599	-62.988	-62.988	3.662	8.545	13.184	164.807	0.162	0.238	-0.143	0.238	0.62	0.238	0.696	0.391	0.162	-0.143
165.007	-64.941	-66.284	-66.406	-66.528	-63.599	-62.988	-62.866	3.54	8.301	13.184	165.007	0.238	0.162	-0.219	0.238	0.467	0.162	0.849	0.238	0.086	-0.372
165.207	-65.063	-66.284	-66.406	-66.528	-63.721	-62.988	-62.866	3.174	8.179	13.062	165.207	0.467	0.162	0.162	0.391	0.238	0.162	1.001	0.162	-0.219	-0.525
165.407	-64.941	-66.284	-66.406	-66.528	-63.721	-62.988	-62.988	2.93	7.935	12.939	165.407	0.544	0.086	0.544	0.315	0.162	0.238	0.925	0.162	-0.601	-0.677
165.607	-65.063	-66.162	-66.406	-66.528	-63.599	-63.11	-62.988	2.686	7.812	12.939	165.607	0.162	-0.067	0.467	0.01	0.238	0.467	0.544	0.086	-0.601	-0.677
165.807	-64.941	-66.162	-66.406	-66.528	-63.721	-62.988	-62.988	2.441	7.568	12.695	165.807	-0.219	0.01	0.238	0.01	0.467	0.62	0.315	-0.219	-0.219	-0.525
166.007	-64.941	-66.162	-66.406	-66.528	-63.721	-63.11	-62.988	2.075	7.446	12.573	166.007	-0.143	0.315	0.162	0.467	0.62	0.467	0.544	-0.601	0.01	-0.448
166.207	-64.941	-66.162	-66.406	-66.528	-63.721	-63.11	-62.988	1.831	7.202	12.573	166.207	0.086	0.391	0.162	0.925	0.467	0.162	0.925	-0.677	-0.143	-0.448
166.407	-65.063	-66.162	-66.406	-66.528	-63.721	-63.11	-62.988	1.587	7.08	12.451	166.407	0.162	0.238	0.162	0.925	0.238	-0.143	0.925	-0.525	-0.296	-0.372
166.607	-65.063	-66.162	-66.406	-66.528	-63.721	-63.232	-62.988	1.343	6.836	12.329	166.607	0.162	0.162	0.162	0.544	0.162	-0.296	0.544	-0.448	-0.143	-0.219
166.807	-64.941	-66.162	-66.406	-66.528	-63.721	-63.232	-63.11	1.099	6.714	12.207	166.807	0.162	0.162	0.162	0.238	0.162	-0.143	0.238	-0.448	0.01	-0.296
167.007	-65.063	-66.162	-66.406	-66.528	-63.843	-63.232	-63.11	0.732	6.47	12.085	167.007	0.162	0.162	0.238	0.238	0.238	0.086	0.162	-0.448	-0.143	-0.525
167.207	-65.063	-66.162	-66.406	-66.528	-63.843	-63.232	-63.11	0.488	6.226	11.963	167.207	0.086	0.162	0.467	0.467	0.467	0.162	0.162	-0.448	-0.296	-0.296
167.407	-65.063	-66.162	-66.406	-66.528	-63.843	-63.232	-63.11	0.244	6.104	11.841	167.407	-0.143	0.162	0.696	0.62	0.62	0.162	0.086	-0.372	-0.219	0.162
167.607	-65.063	-66.162	-66.406	-66.528	-63.843	-63.232	-63.11	-0.122	5.859	11.719	167.607	-0.296	0.238	0.849	0.467	0.467	0.162	-0.067	-0.143	-0.296	0.01
167.807	-65.063	-66.04	-66.284	-66.528	-63.843	-63.232	-63.232	-0.488	5.615	11.597	167.807	-0.143	0.467	1.078	0.238	0.238	0.238	0.01	0.086	-0.601	-0.601
168.007	-65.063	-66.162	-66.406	-66.528	-63.843	-63.354	-63.232	-0.61	5.371	11.475	168.007	0.086	0.62	1.23	0.162	0.238	0.467	0.315	0.162	-0.525	-0.906
168.207	-65.063	-66.04	-66.406	-66.528	-63.843	-63.354	-63.232	-0.854	5.249	11.23	168.207	0.162	0.467	1.001	0.162	0.467	0.62	0.391	0.086	0.01	-0.677
168.407	-65.063	-66.04	-66.406	-66.528	-63.965	-63.354	-63.232	-1.221	5.005	11.23	168.407	0.162	0.238	0.544	0.238	0.62	0.467	0.238	-0.219	0.238	-0.219
168.607	-65.063	-66.162	-66.284	-66.65	-63.965	-63.354	-63.232	-1.587	4.883	10.986	168.607	0.162	0.162	0.238	0.544	0.544	0.238	0.162	-0.601	-0.067	0.01
168.807	-65.063	-66.162	-66.406	-66.65	-63.965	-63.354	-63.232	-1.831	4.639	10.864	168.807	0.162	0.162	0.162	1.001	0.62	0.162	0.162	-0.601	-0.372	-0.143
169.007	-65.063	-66.162	-66.406	-66.65	-64.087	-63.354	-63.232	-2.075	4.272	10.742	169.007	0.162	0.162	0.162	1.23	0.925	0.162	0.238	-0.296	-0.372	-0.296
169.207	-65.186	-66.162	-66.406	-66.65	-63.965	-63.354	-63.232	-2.441	4.15	10.62	169.207	0.162	0.238	0.238	1.001	0.925	0.162	0.467	-0.219	-0.143	-0.143
169.407	-65.063	-66.162	-66.406	-66.65	-63.965	-63.477	-63.232	-2.686	3.906	10.498	169.407	0.238	0.544	0.467	0.62	0.544	0.162	0.62	-0.372	0.086	0.086
169.607	-65.063	-66.162	-66.406	-66.65	-64.087	-63.354	-63.232	-3.052	3.662	10.254	169.607	0.467	0.925	0.62	0.467	0.238	0.162	0.467	-0.448	0.162	0.162
169.807	-65.063	-66.162	-66.406	-66.65	-63.965	-63.477	-63.232	-3.296	3.54	10.01	169.807	0.544	0.925	0.467	0.315	0.162	0.162	0.238	-0.372	0.162	0.162
170.007	-65.063	-66.284	-66.406	-66.65	-63.965	-63.477	-63.232	-3.662	3.296	9.888	170.007	0.086	0.544	0.238	0.01	0.162	0.238	0.162	-0.219	0.162	0.162
170.207	-65.063	-66.284	-66.406	-66.528	-64.087	-63.477	-63.354	-3.906	3.052	9.766	170.207	-0.525	0.315	0.162	-0.143	0.162	0.467	0.162	-0.219	0.162	0.162
170.407	-65.063	-66.162	-66.406	-66.65	-64.087	-63.477	-63.354	-4.15	2.808	9.521	170.407	-0.525	0.467	0.162	-0.219	0.162	0.62	0.238	-0.296	0.086	0.162
170.607	-65.063	-66.284	-66.528	-66.528	-64.087	-63.599	-63.354	-4.395	2.441	9.399	170.607	0.086	0.544	0.162	-0.219	0.238	0.467	0.467	-0.143	-0.143	0.162
170.807	-64.941	-66.284	-66.406	-66.528	-64.087	-63.477	-63.477	-4.761	2.197	9.277	170.807	0.467	0.162	0.162	0.162	0.391	0.238	0.62	0.01	-0.296	0.162
171.007	-65.063	-66.284	-66.406	-66.65	-64.087	-63.599	-63.477	-5.005	2.075	9.155	171.007	0.162	-0.219	0.162	0.544	0.238	0.162	0.467	-0.143	-0.143	0.086
171.207	-65.063	-66.284	-66.406	-66.528	-64.087	-63.599	-63.477	-5.371	1.831	8.911	171.207	-0.219	-0.143	0.162	0.467	-0.296	0.162	0.315	-0.296	0.01	-0.219
171.407	-65.063	-66.162	-66.406	-66.65	-64.087	-63.599	-63.477	-5.615	1.587	8.789	171.407	-0.143	0.086	0.162	0.162	-0.525	0.162	0.467	-0.219	-0.219	-0.601
171.607	-65.063	-66.284	-66.406	-66.528	-64.087	-63.599	-63.477	-5.859	1.343	8.545	171.607	0.086	0.162	0.162	-0.143	-0.219	0.162	0.62	-0.219	-0.601	-0.601
171.807	-65.063	-66.284	-66.406	-66.528	-64.209	-63.599	-63.477	-6.226	1.099	8.423	171.807	0.162	0.086	0.162	-0.296	0.086	0.086	0.467	-0.372	-0.601	-0.296
172.007	-65.063	-66.284	-66.406	-66.528	-64.209	-63.721	-63.599	-6.592	0.854	8.301	172.007	0.162	-0.143	0.162	-0.143	0.238	-0.143	0.238	-0.525	-0.219	-0.296
172.207	-65.186	-66.162	-66.406	-66.528	-64.209	-63.721	-63.599	-6.714	0.61	8.057	172.207	0.238	-0.296	0.238	0.086	0.544	-0.296	0.162	-0.753	0.01	-0.601
172.407	-65.063	-66.162	-66.406	-66.528	-64.209	-63.721	-63.477	-6.958	0.366	7.812	172.407	0.544	-0.143	0.467	0.162	0.925	-0.143	0.162	-0.906	-0.143	-0.677
172.607	-65.063	-66.162	-66.406	-66.528	-64.209	-63.599	-63.599	-7.324	0.122	7.69	172.607	0.925	0.162	0.62	0.162	0.849	0.086	0.162	-0.677	-0.296	-0.601
172.807	-65.186	-66.162	-66.406	-66.528	-64.209	-63.721	-63.599	-7.568	-0.122	7.568	172.807	0.925	0.544	0.467	0.086	0.238	0.086	0.162	-0.296	-0.219	-0.753
173.007	-65.063	-66.162	-66.406	-66.528	-64.209	-63.721	-63.477	-7.935	-0.244	7.324	173.007	0.62	0.925	0.238	-0.143	-0.219	-0.143	0.162	-0.219	-0.296	-0.906
173.207	-65.063	-66.162	-66.406	-66.528	-64.209	-63.721	-63.599	-8.179	-0.488	7.08	173.207	0.544	0.925	0.162	-0.296	-0.143	-0.296	0.086	-0.296	-0.677	-0.677
173.407	-65.186	-66.04	-66.406	-66.528	-64.209	-63.721	-63.599	-8.423	-0.854	6.958	173.407	0.62	0.544	0.162	-0.143	0.01	-0.143	-0.219	-0.143	-0.906	-0.296
173.607	-65.186	-66.162	-66.406	-66.528	-64.209	-63.721	-63.599	-8.667	-1.099	6.836	173.607	0.391	0.238	0.162	0.086	-0.219	0.086	-0.601	0.01	-0.677	-0.372
173.807	-65.063	-66.162	-66.406	-66.528	-64.209	-63.721	-63.599	-8.911	-1.343	6.592	173.807	-0.067	0.162	0.162	0.086	-0.601	0.162	-0.601	-0.219	-0.296	-0.982
174.007	-65.186	-66.162	-66.406	-66.65	-64.331	-63.721	-63.599	-9.277	-1.587	6.47	174.007	-0.296	0.162	0.162	-0.143	-0.601	0.162	-0.219	-0.601	-0.296	-1.364
174.207	-65.186	-66.162	-66.406	-66.528	-64.331	-63.721	-63.599	-9.521	-1.831	6.226	174.207	-0.143	0.086	0.162	-0.219	-0.219	0.162	0.01	-0.677	-0.601	-0.982
174.407	-65.186	-66.162	-66.406	-66.65	-64.209	-63.843	-63.599	-9.766	-2.075	6.104	174.407	0.01	-0.143	0.162	0.162	0.086	0.162	-0.143	-0.677	-0.601	-0.372
174.607	-65.186	-66.162	-66.406	-66.528	-64.209	-63.843	-63.599	-10.01	-2.319	5.737	174.607	-0.219	-0.296	0.162	0.544	0.162	0.162	-0.296	-1.059	-0.296	-0.296
174.807	-65.186	-66.162	-66.406	-66.65	-64.331	-63.721	-63.599	-10.254	-2.563	5.615	174.807	-0.677	-0.143	0.162	0.467	0.086	0.162	-0.143	-1.44	-0.296	-0.677
175.007	-65.186	-66.162	-66.406	-66.65	-64.331	-63.721	-63.721	-10.498	-2.808	5.371	175.007	-0.906	0.086	0.162	0.238	-0.143	0.086	0.01	-1.287	-0.677	-0.906
175.207	-65.186	-66.162	-66.406	-66.65	-64.331	-63.843	-63.721	-10.742	-3.052	5.249	175.207	-0.677	0.162	0.162	0.162	-0.296	-0.219	-0.219	-0.83	-0.906	-0.677
175.407	-65.186	-66.162	-66.406	-66.65	-64.453	-63.843	-63.721	-10.986	-3.296	5.005	175.407	-0.219	0.162	0.162	0.162	-0.219	-0.677	-0.601	-0.525	-0.677	-0.296
175.607	-65.186	-66.162	-66.406	-66.65	-64.331	-63.843	-63.721	-11.353	-3.54	4.761	175.607	0.086	0.162	0.162	0.086	-0.296	-0.906	-0.525	-0.448	-0.296	-0.219
175.807	-65.186	-66.162	-66.406	-66.772	-64.331	-63.843	-63.599	-11.597	-3.784	4.639	175.807	0.086	0.086	0.162	-0.143	-0.601	-0.677	0.01	-0.448	-0.296	-0.296
176.007	-65.186	-66.162	-66.406	-66.65	-64.453	-63.843	-63.721	-11.719	-4.028	4.272	176.007	-0.219	-0.219	0.162	-0.372	-0.601	-0.219	0.162	-0.372	-0.601	-0.143
176.207	-65.186	-66.284	-66.406	-66.65	-64.453	-63.843	-63.721	-11.963	-4.395	4.028	176.207	-0.601	-0.677	0.162	-0.448	-0.219	0.01	-0.372	-0.296	-0.601	0.01
176.407	-65.186	-66.284	-66.406	-66.65	-64.331	-63.965	-63.721	-12.207	-4.639	3.784	176.407	-0.677	-0.906	0.086	-0.372	0.01	-0.067	-0.83	-0.601	-0.219	-0.219
176.607	-65.186	-66.284	-66.406	-66.65	-64.331	-63.965	-63.843	-12.451	-4.883	3.662	176.607	-0.525	-0.753	-0.143	-0.219	-0.143	-0.067	-0.677	-1.059	0.01	-0.601
176.807	-65.186	-66.284	-66.406	-66.65	-64.453	-63.965	-63.843	-12.695	-5.127	3.418	176.807	-0.448	-0.525	-0.296	-0.219	-0.296	0.01	-0.219	-0.906	-0.143	-0.677
177.007	-65.063	-66.284	-66.406	-66.65	-64.453	-63.965	-63.843	-12.939	-5.249	3.174	177.007	-0.448	-0.372	-0.219	-0.296	-0.219	-0.143	0.086	-0.296	-0.372	-0.525
177.207	-65.063	-66.284	-66.406	-66.65	-64.453	-63.965	-63.843	-13.184	-5.493	2.93	177.207	-0.372	-0.143	-0.219	-0.143	-0.296	-0.372	0.086	0.01	-0.448	-0.448
177.407	-65.186	-66.284	-66.528	-66.65	-64.453	-64.087	-63.843	-13.428	-5.859	2.686	177.407	-0.143	0.086	-0.219	0.01	-0.601	-0.372	-0.143	-0.143	-0.448	-0.525
177.607	-65.186	-66.284	-66.406	-66.65	-64.453	-63.965	-63.843	-13.55	-5.981	2.441	177.607	0.01	0.086	0.162	-0.219	-0.601	-0.219	-0.296	-0.296	-0.448	-0.677
177.807	-65.186	-66.284	-66.528	-66.65	-64.453	-63.965	-63.843	-13.916	-6.226	2.319	177.807	-0.219	-0.219	0.544	-0.601	-0.219	-0.296	-0.143	-0.219	-0.448	-0.601
178.007	-65.186	-66.284	-66.528	-66.65	-64.453	-64.087	-63.965	-14.16	-6.47	1.953	178.007	-0.601	-0.601	0.467	-0.601	0.086	-0.601	0.01	-0.296	-0.448	-0.296
178.207	-65.186	-66.284	-66.406	-66.528	-64.453	-63.965	-63.965	-14.282	-6.836	1.709	178.207	-0.601	-0.601	0.238	-0.296	0.162	-0.601	-0.143	-0.677	-0.448	-0.219
178.407	-65.186	-66.284	-66.406	-66.528	-64.575	-63.965	-63.965	-14.526	-7.08	1.587	178.407	-0.219	-0.219	0.162	-0.296	0.086	-0.219	-0.296	-0.906	-0.448	-0.296
178.607	-65.063	-66.284	-66.406	-66.65	-64.453	-63.965	-63.965	-14.771	-7.324	1.343	178.607	0.01	0.086	0.162	-0.601	-0.143	0.01	-0.143	-0.753	-0.372	-0.143
178.807	-65.186	-66.284	-66.406	-66.528	-64.575	-64.087	-63.965	-14.893	-7.446	1.099	178.807	-0.143	0.162	0.162	-0.601	-0.372	-0.219	0.086	-0.601	-0.219	0.01
179.007	-65.186	-66.284	-66.406	-66.528	-64.453	-64.087	-63.965	-15.137	-7.812	0.854	179.007	-0.296	0.162	0.162	-0.219	-0.525	-0.601	0.162	-0.753	-0.296	-0.219
179.207	-65.186	-66.284	-66.406	-66.528	-64.575	-64.087	-63.965	-15.381	-7.935	0.61	179.207	-0.143	0.162	0.238	0.086	-0.601	-0.601	0.162	-0.906	-0.677	-0.601
179.407	-65.186	-66.284	-66.406	-66.528	-64.575	-64.087	-63.965	-15.503	-8.301	0.366	179.407	0.086	0.086	0.391	0.086	-0.372	-0.219	0.162	-0.753	-0.906	-0.601
179.607	-65.186	-66.284	-66.406	-66.528	-64.575	-64.087	-63.965	-15.747	-8.545	0.122	179.607	0.086	-0.143	0.315	-0.143	-0.067	0.086	0.086	-0.601	-0.753	-0.219
179.807	-65.186	-66.284	-66.406	-66.528	-64.575	-64.087	-63.965	-15.991	-8.789	-0.122	179.807	-0.143	-0.219	0.01	-0.296	-0.143	0.162	-0.219	-0.753	-0.601	0.086
180.007	-65.186	-66.162	-66.406	-66.528	-64.575	-64.087	-63.965	-16.113	-9.033	-0.244	180.007	-0.296	0.162	-0.067	-0.143	-0.448	0.162	-0.601	-0.906	-0.753	0.086
180.207	-65.186	-66.284	-66.406	-66.528	-64.575	-64.087	-63.965	-16.357	-9.155	-0.488	180.207	-0.143	0.544	0.086	0.086	-0.677	0.162	-0.601	-0.677	-0.906	-0.219
180.407	-65.186	-66.284	-66.406	-66.65	-64.575	-64.209	-64.087	-16.602	-9.399	-0.732	180.407	0.086	0.391	0.086	0.162	-0.601	0.162	-0.219	-0.296	-0.677	-0.601
180.607	-65.186	-66.284	-66.406	-66.65	-64.697	-64.209	-64.087	-16.724	-9.644	-0.977	180.607	0.086	-0.067	-0.219	0.162	-0.296	0.162	0.086	-0.219	-0.219	-0.601
180.807	-65.186	-66.284	-66.528	-66.65	-64.575	-64.087	-63.965	-16.968	-9.888	-1.221	180.807	-0.219	-0.296	-0.677	0.086	-0.219	0.162	0.162	-0.372	0.01	-0.219
181.007	-65.186	-66.284	-66.406	-66.528	-64.697	-64.209	-64.087	-17.09	-10.01	-1.343	181.007	-0.601	-0.143	-0.906	-0.143	-0.296	0.162	0.162	-0.448	-0.219	0.086
181.207	-65.186	-66.284	-66.528	-66.65	-64.697	-64.209	-64.087	-17.334	-10.254	-1.587	181.207	-0.601	0.01	-0.677	-0.296	-0.219	0.086	0.086	-0.372	-0.601	0.086
181.407	-65.186	-66.284	-66.406	-66.65	-64.697	-64.209	-64.087	-17.456	-10.498	-1.831	181.407	-0.296	-0.143	-0.219	-0.143	-0.219	-0.219	-0.143	-0.143	-0.601	-0.219
181.607	-65.186	-66.284	-66.406	-66.65	-64.697	-64.209	-63.965	-17.7	-10.742	-2.075	181.607	-0.219	-0.296	0.086	0.086	-0.296	-0.601	-0.219	0.086	-0.219	-0.601
181.807	-65.186	-66.284	-66.528	-66.65	-64.697	-64.209	-64.087	-17.822	-10.864	-2.319	181.807	-0.296	-0.143	0.162	0.162	-0.219	-0.601	0.162	0.162	0.01	-0.601
182.007	-65.186	-66.284	-66.406	-66.65	-64.697	-64.209	-64.087	-17.944	-11.108	-2.686	182.007	-0.143	0.01	0.162	0.086	-0.296	-0.219	0.544	0.162	-0.143	-0.219
182.207	-65.186	-66.284	-66.406	-66.65	-64.697	-64.209	-64.087	-18.188	-11.353	-2.808	182.207	0.01	-0.219	0.162	-0.143	-0.677	0.086	0.467	0.162	-0.296	0.086
182.407	-65.186	-66.406	-66.406	-66.528	-64.697	-64.209	-64.087	-18.311	-11.597	-3.052	182.407	-0.219	-0.601	0.086	-0.296	-0.906	0.238	0.162	0.162	-0.143	0.162
182.607	-65.186	-66.284	-66.406	-66.65	-64.697	-64.209	-64.087	-18.555	-11.841	-3.296	182.607	-0.601	-0.601	-0.143	-0.067	-0.677	0.467	-0.143	0.162	0.086	0.162
182.807	-65.186	-66.284	-66.528	-66.65	-64.697	-64.209	-64.087	-18.677	-11.963	-3.54	182.807	-0.677	-0.219	-0.372	0.391	-0.219	0.696	-0.219	0.162	0.162	0.162
183.007	-65.063	-66.284	-66.406	-66.65	-64.697	-64.209	-64.209	-18.799	-12.207	-3.784	183.007	-0.525	0.01	-0.525	0.696	0.086	0.772	0.162	0.162	0.238	0.162
183.207	-65.186	-66.284	-66.406	-66.65	-64.697	-64.209	-64.209	-19.043	-12.451	-4.15	183.207	-0.448	-0.143	-0.677	0.772	0.162	0.696	0.467	0.086	0.467	0.162
183.407	-65.186	-66.284	-66.528	-66.528	-64.697	-64.331	-64.209	-19.165	-12.573	-4.272	183.407	-0.448	-0.296	-0.525	0.696	0.162	0.467	0.162	-0.143	0.62	0.162
183.607	-65.186	-66.284	-66.406	-66.528	-64.697	-64.331	-64.209	-19.287	-12.817	-4.517	183.607	-0.372	-0.143	0.162	0.467	0.162	0.238	-0.219	-0.296	0.391	0.162
183.807	-65.186	-66.284	-66.406	-66.65	-64.819	-64.331	-64.209	-19.531	-12.939	-4.761	183.807	-0.143	0.086	0.849	0.238	0.162	0.162	-0.143	-0.143	-0.067	0.238
184.007	-65.186	-66.284	-66.528	-66.65	-64.819	-64.331	-64.209	-19.653	-13.184	-5.127	184.007	0.086	0.086	0.925	0.162	0.162	0.162	0.162	0.086	-0.296	0.467
184.207	-65.186	-66.284	-66.528	-66.65	-64.819	-64.331	-64.209	-19.775	-13.428	-5.249	184.207	0.162	-0.143	0.544	0.162	0.162	0.238	0.391	0.238	-0.143	0.62
184.407	-65.186	-66.284	-66.528	-66.528	-64.819	-64.331	-64.331	-20.02	-13.672	-5.493	184.407	0.162	-0.296	0.238	0.162	0.162	0.467	0.315	0.544	0.086	0.467
184.607	-65.186	-66.284	-66.528	-66.528	-64.819	-64.331	-64.331	-20.142	-13.794	-5.859	184.607	0.238	-0.143	0.162	0.238	0.162	0.696	0.01	1.001	0.162	0.162
184.807	-65.063	-66.284	-66.406	-66.528	-64.819	-64.331	-64.209	-20.386	-14.038	-6.104	184.807	0.467	0.086	0.086	0.467	0.238	0.772	-0.067	1.23	0.162	-0.067
185.007	-65.186	-66.284	-66.528	-66.528	-64.697	-64.453	-64.331	-20.508	-14.16	-6.348	185.007	0.544	0.238	-0.143	0.62	0.467	0.696	0.086	1.001	0.162	-0.067
185.207	-65.063	-66.284	-66.528	-66.528	-64.819	-64.331	-64.331	-20.63	-14.404	-6.592	185.207	0.238	0.544	-0.296	0.467	0.62	0.544	0.162	0.544	0.162	0.01
185.407	-65.063	-66.162	-66.406	-66.528	-64.819	-64.331	-64.331	-20.752	-14.648	-6.714	185.407	0.162	1.001	-0.143	0.238	0.467	0.544	0.238	0.238	0.162	-0.143
185.607	-65.186	-66.284	-66.528	-66.528	-64.697	-64.331	-64.331	-20.996	-14.893	-7.08	185.607	0.62	1.23	0.086	0.238	0.315	0.62	0.467	0.162	0.086	-0.372
185.807	-65.186	-66.284	-66.406	-66.528	-64.819	-64.453	-64.331	-21.118	-15.015	-7.202	185.807	0.849	1.001	0.162	0.544	0.467	0.467	0.62	0.086	-0.067	-0.372
186.007	-65.063	-66.284	-66.528	-66.528	-64.819	-64.453	-64.331	-21.24	-15.137	-7.446	186.007	0.62	0.62	0.162	0.925	0.62	0.238	0.467	-0.143	0.01	-0.219
186.207	-65.186	-66.284	-66.406	-66.406	-64.819	-64.453	-64.331	-21.484	-15.381	-7.69	186.207	0.544	0.544	0.238	0.925	0.467	0.238	0.238	-0.296	0.238	-0.219
186.407	-65.186	-66.284	-66.406	-66.528	-64.819	-64.453	-64.331	-21.484	-15.503	-7.935	186.407	0.62	0.696	0.544	0.544	0.315	0.467	0.162	-0.143	0.086	-0.296
186.607	-65.186	-66.284	-66.528	-66.528	-64.819	-64.453	-64.331	-21.606	-15.747	-8.179	186.607	0.467	0.772	0.925	0.315	0.544	0.62	0.162	0.086	-0.296	-0.143
186.807	-65.186	-66.406	-66.406	-66.528	-64.819	-64.453	-64.331	-21.851	-15.869	-8.423	186.807	0.315	0.696	1.001	0.467	0.849	0.467	0.162	0.162	-0.448	0.01
187.007	-65.186	-66.284	-66.406	-66.528	-64.941	-64.453	-64.453	-21.973	-16.113	-8.545	187.007	0.467	0.467	0.849	0.62	0.62	0.238	0.162	0.086	-0.372	-0.143
187.207	-65.308	-66.284	-66.406	-66.528	-64.819	-64.453	-64.453	-22.095	-16.357	-8.911	187.207	0.62	0.238	0.696	0.467	0.086	0.162	0.162	-0.143	-0.143	-0.296
187.407	-65.186	-66.406	-66.406	-66.528	-64.941	-64.453	-64.453	-22.217	-16.479	-9.033	187.407	0.467	0.162	0.467	0.315	-0.067	0.162	0.162	-0.296	0.086	-0.067
187.608	-65.186	-66.284	-66.406	-66.528	-64.941	-64.575	-64.453	-22.461	-16.724	-9.277	187.608	0.238	0.238	0.238	0.467	0.086	0.162	0.238	-0.143	0.162	0.315
187.808	-65.186	-66.284	-66.406	-66.406	-64.819	-64.453	-64.453	-22.583	-16.846	-9.521	187.808	0.162	0.544	0.162	0.62	0.162	0.162	0.467	0.086	0.162	0.315
188.008	-65.186	-66.406	-66.406	-66.528	-64.941	-64.453	-64.331	-22.705	-17.09	-9.644	188.008	0.162	0.925	0.162	0.467	0.162	0.162	0.62	0.162	0.162	0.01
188.208	-65.186	-66.284	-66.406	-66.528	-64.941	-64.453	-64.331	-22.827	-17.212	-10.01	188.208	0.162	0.849	0.162	0.238	0.162	0.162	0.467	0.162	0.162	0.01
188.408	-65.186	-66.284	-66.406	-66.528	-64.941	-64.575	-64.453	-22.949	-17.456	-10.254	188.408	0.162	0.238	0.162	0.238	0.162	0.162	0.238	0.162	0.162	0.391
188.608	-65.186	-66.406	-66.406	-66.528	-64.941	-64.453	-64.453	-23.071	-17.456	-10.498	188.608	0.162	-0.219	0.086	0.467	0.162	0.162	0.162	0.162	0.162	0.544
188.808	-65.186	-66.406	-66.528	-66.528	-64.941	-64.575	-64.453	-23.193	-17.7	-10.742	188.808	0.238	-0.143	-0.143	0.62	0.162	0.238	0.162	0.162	0.238	0.086
189.008	-65.186	-66.284	-66.406	-66.528	-64.941	-64.575	-64.453	-23.315	-17.944	-10.864	189.008	0.391	0.01	-0.296	0.467	0.162	0.467	0.162	0.162	0.467	-0.601
189.208	-65.186	-66.406	-66.406	-66.528	-64.941	-64.575	-64.575	-23.438	-18.066	-11.108	189.208	0.391	-0.143	-0.143	0.315	0.238	0.62	0.162	0.238	0.62	-0.906
189.408	-65.186	-66.406	-66.406	-66.528	-64.941	-64.575	-64.575	-23.682	-18.188	-11.353	189.408	0.315	-0.296	0.086	0.544	0.467	0.467	0.162	0.391	0.467	-0.677
189.608	-65.063	-66.406	-66.406	-66.528	-64.941	-64.453	-64.575	-23.804	-18.311	-11.475	189.608	0.391	-0.143	0.238	0.849	0.62	0.238	0.086	0.315	0.238	-0.219
189.808	-65.063	-66.406	-66.528	-66.406	-64.941	-64.575	-64.575	-23.926	-18.555	-11.841	189.808	0.467	0.086	0.467	0.62	0.544	0.162	-0.143	0.01	0.162	0.01
190.008	-65.186	-66.406	-66.406	-66.406	-64.941	-64.575	-64.575	-24.048	-18.799	-12.085	190.008	0.544	0.162	0.544	0.162	0.62	0.086	-0.296	-0.067	0.162	-0.143
190.208	-65.063	-66.406	-66.406	-66.528	-65.063	-64.453	-64.575	-24.17	-18.921	-12.207	190.208	0.62	0.162	0.162	0.238	0.925	-0.143	-0.143	0.086	0.238	-0.219
190.408	-65.063	-66.406	-66.406	-66.528	-65.063	-64.575	-64.575	-24.292	-19.043	-12.329	190.408	0.467	0.162	-0.219	0.544	0.849	-0.296	0.086	0.162	0.467	0.162
190.608	-65.186	-66.406	-66.528	-66.528	-64.941	-64.575	-64.575	-24.414	-19.287	-12.573	190.608	0.315	0.162	-0.067	0.467	0.238	-0.143	0.238	0.162	0.62	0.467
190.808	-65.063	-66.284	-66.406	-66.528	-65.063	-64.575	-64.575	-24.536	-19.287	-12.817	190.808	0.467	0.238	0.391	0.238	-0.219	0.086	0.467	0.238	0.467	0.162
191.008	-65.063	-66.284	-66.528	-66.528	-64.941	-64.575	-64.575	-24.78	-19.531	-13.184	191.008	0.62	0.467	0.62	0.162	-0.143	0.162	0.62	0.467	0.238	-0.219
191.208	-65.063	-66.284	-66.528	-66.528	-64.941	-64.575	-64.697	-24.902	-19.775	-13.306	191.208	0.467	0.696	0.467	0.238	0.086	0.162	0.467	0.544	0.162	-0.143
191.408	-65.063	-66.284	-66.406	-66.406	-65.063	-64.575	-64.575	-25.024	-19.897	-13.428	191.408	0.238	0.849	0.238	0.544	0.162	0.238	0.238	0.162	0.086	0.086
191.608	-65.063	-66.406	-66.406	-66.528	-65.063	-64.575	-64.575	-25.146	-20.142	-13.794	191.608	0.238	1.001	0.162	0.849	0.162	0.391	0.162	-0.219	-0.219	0.086
191.808	-65.186	-66.406	-66.406	-66.406	-65.063	-64.575	-64.697	-25.269	-20.264	-13.916	191.808	0.467	0.925	0.162	0.62	0.238	0.391	0.162	-0.219	-0.601	-0.219
192.008	-65.063	-66.406	-66.406	-66.528	-65.063	-64.575	-64.697	-25.391	-20.386	-14.16	192.008	0.62	0.544	0.162	0.162	0.544	0.315	0.162	-0.219	-0.525	-0.601
192.208	-65.063	-66.406	-66.406	-66.406	-65.063	-64.697	-64.697	-25.513	-20.63	-14.282	192.208	0.544	0.238	0.162	0.238	0.925	0.315	0.162	-0.296	0.086	-0.677
192.408	-65.186	-66.406	-66.406	-66.528	-65.063	-64.697	-64.575	-25.635	-20.752	-14.526	192.408	0.62	0.162	0.238	0.467	0.925	0.086	0.162	-0.143	0.544	-0.601
192.608	-65.186	-66.406	-66.406	-66.528	-65.063	-64.697	-64.697	-25.635	-20.874	-14.648	192.608	0.925	0.162	0.467	0.086	0.544	-0.219	0.162	0.01	0.467	-0.677
192.808	-65.186	-66.406	-66.406	-66.528	-65.063	-64.697	-64.575	-25.879	-21.118	-14.893	192.808	0.849	0.162	0.62	-0.525	0.238	-0.143	0.086	-0.219	0.238	-0.601
193.008	-65.186	-66.406	-66.406	-66.528	-65.063	-64.697	-64.697	-26.001	-21.118	-15.015	193.008	0.162	0.162	0.467	-0.601	0.162	0.01	-0.143	-0.601	0.086	-0.219
193.208	-65.186	-66.406	-66.406	-66.528	-65.063	-64.697	-64.697	-26.001	-21.362	-15.259	193.208	-0.601	0.086	0.238	-0.219	0.162	-0.143	-0.296	-0.601	-0.143	0.01
193.408	-65.186	-66.406	-66.284	-66.528	-65.063	-64.697	-64.697	-26.245	-21.484	-15.381	193.408	-0.906	-0.143	0.162	0.086	0.162	-0.296	-0.143	-0.296	-0.296	-0.219
193.608	-65.186	-66.406	-66.284	-66.528	-65.063	-64.697	-64.697	-26.367	-21.729	-15.625	193.608	-0.677	-0.296	0.162	0.162	0.162	-0.143	0.086	-0.219	-0.067	-0.677
193.808	-65.308	-66.406	-66.406	-66.528	-65.186	-64.697	-64.575	-26.489	-21.851	-15.747	193.808	-0.219	-0.143	0.162	0.162	0.086	0.086	0.162	-0.372	0.315	-0.982
194.008	-65.186	-66.406	-66.406	-66.406	-65.186	-64.697	-64.697	-26.611	-21.851	-15.991	194.008	0.162	0.086	0.162	0.162	-0.143	0.162	0.162	-0.525	0.238	-0.982
194.208	-65.186	-66.406	-66.406	-66.528	-65.063	-64.697	-64.819	-26.733	-22.095	-16.113	194.208	0.467	0.162	0.162	0.162	-0.296	0.162	0.162	-0.753	-0.372	-0.753
194.408	-65.186	-66.406	-66.406	-66.406	-65.063	-64.819	-64.697	-26.855	-22.217	-16.357	194.408	0.62	0.162	0.162	0.162	-0.219	0.162	0.086	-0.982	-0.83	-0.525
194.608	-65.186	-66.284	-66.406	-66.528	-65.063	-64.819	-64.819	-26.978	-22.339	-16.602	194.608	0.467	0.162	0.162	0.162	-0.219	0.162	-0.219	-1.059	-0.753	-0.448
194.808	-65.186	-66.406	-66.406	-66.528	-65.063	-64.697	-64.819	-27.1	-22.583	-16.724	194.808	0.238	0.162	0.162	0.162	-0.296	0.162	-0.677	-0.982	-0.525	-0.448
195.008	-65.186	-66.284	-66.406	-66.528	-65.063	-64.819	-64.819	-27.1	-22.583	-16.846	195.008	0.086	0.162	0.162	0.162	-0.143	0.162	-0.906	-0.677	-0.448	-0.448
195.208	-65.186	-66.406	-66.406	-66.528	-65.063	-64.819	-64.819	-27.344	-22.705	-17.09	195.208	-0.143	0.162	0.162	0.162	0.086	0.086	-0.677	-0.296	-0.525	-0.448
195.408	-65.186	-66.406	-66.406	-66.528	-65.063	-64.819	-64.819	-27.466	-22.827	-17.334	195.408	-0.296	0.162	0.162	0.162	0.162	-0.219	-0.296	-0.219	-0.677	-0.372
195.608	-65.186	-66.406	-66.406	-66.528	-65.186	-64.819	-64.941	-27.588	-22.949	-17.456	195.608	-0.219	0.162	0.162	0.086	0.086	-0.601	-0.219	-0.296	-0.601	-0.219
195.808	-65.186	-66.406	-66.406	-66.528	-65.186	-64.819	-64.941	-27.71	-23.193	-17.578	195.808	-0.219	0.086	0.162	-0.143	-0.219	-0.601	-0.219	-0.219	-0.296	-0.296
196.008	-65.186	-66.406	-66.406	-66.528	-65.186	-64.819	-64.819	-27.832	-23.315	-17.822	196.008	-0.296	-0.219	0.162	-0.372	-0.677	-0.219	0.162	-0.219	-0.296	-0.601
196.208	-65.186	-66.528	-66.406	-66.528	-65.186	-64.819	-64.819	-27.954	-23.438	-17.944	196.208	-0.143	-0.601	0.162	-0.525	-0.906	0.01	0.544	-0.296	-0.677	-0.601
196.408	-65.186	-66.406	-66.406	-66.528	-65.186	-64.819	-64.941	-28.076	-23.56	-18.066	196.408	0.01	-0.677	0.086	-0.677	-0.753	-0.143	0.467	-0.143	-0.906	-0.296
196.608	-65.186	-66.406	-66.528	-66.528	-65.186	-64.819	-64.941	-28.076	-23.682	-18.311	196.608	-0.219	-0.525	-0.143	-0.601	-0.601	-0.296	0.238	0.086	-0.677	-0.296
196.808	-65.186	-66.406	-66.406	-66.528	-65.186	-64.819	-64.941	-28.198	-23.804	-18.433	196.808	-0.601	-0.372	-0.296	-0.296	-0.677	-0.143	0.162	0.162	-0.296	-0.677
197.008	-65.186	-66.406	-66.406	-66.528	-65.308	-64.819	-64.941	-28.32	-23.926	-18.677	197.008	-0.601	-0.143	-0.143	-0.219	-0.601	0.01	0.162	0.162	-0.296	-0.906
197.208	-65.186	-66.406	-66.406	-66.528	-65.308	-64.819	-64.941	-28.442	-24.048	-18.799	197.208	-0.219	0.086	0.086	-0.372	-0.219	-0.143	0.162	0.162	-0.677	-0.677
197.408	-65.186	-66.406	-66.528	-66.528	-65.308	-64.819	-64.941	-28.564	-24.17	-19.043	197.408	0.01	0.238	0.086	-0.448	0.086	-0.372	0.162	0.086	-0.906	-0.219
197.608	-65.186	-66.406	-66.406	-66.528	-65.186	-64.697	-64.941	-28.687	-24.414	-19.165	197.608	-0.143	0.391	-0.143	-0.448	0.162	-0.372	0.162	-0.143	-0.753	0.01
197.808	-65.186	-66.406	-66.406	-66.528	-65.308	-64.819	-64.941	-28.809	-24.536	-19.287	197.808	-0.296	0.315	-0.372	-0.525	0.162	-0.067	0.162	-0.296	-0.601	-0.219
198.008	-65.186	-66.406	-66.528	-66.528	-65.308	-64.819	-64.941	-28.931	-24.658	-19.531	198.008	-0.143	0.01	-0.525	-0.677	0.162	0.238	0.162	-0.143	-0.753	-0.601
198.208	-65.186	-66.406	-66.528	-66.528	-65.186	-64.819	-64.941	-28.931	-24.78	-19.653	198.208	0.01	-0.067	-0.677	-0.601	0.086	0.086	0.086	0.01	-0.906	-0.677
198.408	-65.186	-66.406	-66.406	-66.528	-65.308	-64.819	-64.941	-29.053	-25.024	-19.775	198.408	-0.143	0.086	-0.525	-0.219	-0.219	-0.219	-0.143	-0.143	-0.753	-0.525
198.608	-65.308	-66.406	-66.406	-66.406	-65.308	-64.941	-64.941	-29.175	-25.024	-20.02	198.608	-0.296	0.162	0.01	0.086	-0.601	-0.143	-0.296	-0.372	-0.525	-0.372
198.808	-65.308	-66.406	-66.406	-66.406	-65.308	-64.819	-64.941	-29.297	-25.146	-20.142	198.808	-0.143	0.086	0.238	0.162	-0.601	0.086	-0.143	-0.448	-0.448	-0.143
199.008	-65.186	-66.406	-66.284	-66.406	-65.308	-64.819	-64.941	-29.419	-25.269	-20.264	199.008	0.086	-0.143	-0.067	0.086	-0.219	0.162	0.086	-0.448	-0.448	0.086
199.208	-65.186	-66.406	-66.406	-66.528	-65.308	-64.819	-64.941	-29.541	-25.391	-20.508	199.208	0.086	-0.296	-0.372	-0.143	0.086	0.162	0.162	-0.525	-0.448	0.162
199.408	-65.186	-66.406	-66.406	-66.528	-65.186	-64.941	-64.941	-29.663	-25.513	-20.63	199.408	-0.219	-0.219	-0.448	-0.296	0.162	0.162	0.162	-0.677	-0.448	0.086
199.608	-65.186	-66.284	-66.406	-66.528	-65.186	-64.941	-64.941	-29.663	-25.757	-20.874	199.608	-0.601	-0.296	-0.525	-0.219	0.162	0.086	0.238	-0.601	-0.448	-0.143
199.808	-65.186	-66.284	-66.406	-66.406	-65.308	-64.941	-64.941	-29.785	-25.757	-20.996	199.808	-0.601	-0.677	-0.677	-0.143	0.162	-0.143	0.391	-0.296	-0.448	-0.296
200.008	-65.186	-66.284	-66.406	-66.528	-65.186	-64.941	-64.941	-29.907	-26.001	-21.118	200.008	-0.219	-0.906	-0.601	0.01	0.162	-0.296	0.238	-0.296	-0.372	-0.219
200.208	-65.186	-66.406	-66.406	-66.528	-65.308	-64.941	-64.941	-30.151	-26.123	-21.362	200.208	0.086	-0.677	-0.219	0.315	0.086	-0.219	-0.296	-0.677	-0.219	-0.296
200.408	-65.186	-66.406	-66.406	-66.528	-65.186	-64.941	-64.941	-30.151	-26.245	-21.484	200.408	0.238	-0.219	0.086	0.391	-0.067	-0.219	-0.525	-0.906	-0.296	-0.677
200.608	-65.186	-66.284	-66.406	-66.406	-65.186	-64.941	-64.941	-30.273	-26.367	-21.606	200.608	0.467	0.086	0.162	0.162	0.01	-0.296	-0.296	-0.677	-0.677	-0.906
200.808	-65.308	-66.284	-66.406	-66.406	-65.308	-64.941	-65.063	-30.396	-26.489	-21.729	200.808	0.62	0.162	0.162	-0.067	0.238	-0.219	-0.219	-0.219	-0.906	-0.677
201.008	-65.186	-66.284	-66.406	-66.528	-65.308	-64.941	-65.063	-30.518	-26.611	-21.851	201.008	0.467	0.162	0.162	0.01	0.086	-0.296	-0.296	0.01	-0.677	-0.219
201.208	-65.186	-66.284	-66.406	-66.528	-65.308	-64.941	-64.941	-30.64	-26.733	-21.973	201.208	0.238	0.162	0.162	0.238	-0.219	-0.601	-0.143	-0.219	-0.219	0.086
201.408	-65.186	-66.284	-66.406	-66.528	-65.308	-64.941	-65.063	-30.64	-26.855	-22.217	201.408	0.162	0.162	0.086	0.086	-0.143	-0.601	0.01	-0.601	0.086	0.162
201.608	-65.186	-66.284	-66.406	-66.406	-65.308	-64.941	-65.063	-30.762	-26.978	-22.339	201.608	0.162	0.162	-0.219	-0.219	0.086	-0.296	-0.143	-0.601	0.162	0.086
201.808	-65.186	-66.406	-66.406	-66.528	-65.308	-64.941	-65.063	-30.884	-27.1	-22.461	201.808	0.086	0.162	-0.601	-0.143	0.162	-0.296	-0.219	-0.219	0.162	-0.143
202.008	-65.186	-66.284	-66.406	-66.528	-65.308	-64.941	-65.063	-30.884	-27.1	-22.583	202.008	-0.143	0.162	-0.601	0.01	0.162	-0.601	0.162	0.086	0.162	-0.372
202.208	-65.186	-66.284	-66.406	-66.528	-65.308	-64.941	-65.063	-31.006	-27.344	-22.705	202.208	-0.296	0.162	-0.219	-0.143	0.162	-0.601	0.544	0.162	0.162	-0.448
202.408	-65.186	-66.284	-66.528	-66.528	-65.308	-64.941	-65.063	-31.128	-27.466	-22.827	202.408	-0.143	0.162	0.086	-0.219	0.162	-0.219	0.467	0.086	0.162	-0.372
202.608	-65.186	-66.284	-66.406	-66.406	-65.308	-64.941	-65.063	-31.25	-27.588	-23.071	202.608	0.01	0.162	0.162	0.162	0.162	0.086	0.162	-0.143	0.162	-0.219
202.808	-65.186	-66.406	-66.528	-66.406	-65.308	-64.941	-65.186	-31.372	-27.71	-23.193	202.808	-0.143	0.162	0.162	0.467	0.162	0.086	-0.143	-0.296	0.162	-0.296
203.008	-65.186	-66.406	-66.528	-66.528	-65.308	-64.941	-65.063	-31.494	-27.832	-23.315	203.008	-0.296	0.162	0.162	0.162	0.162	-0.143	-0.296	-0.067	0.162	-0.601
203.208	-65.186	-66.284	-66.528	-66.406	-65.308	-64.941	-65.063	-31.616	-27.832	-23.438	203.208	-0.143	0.162	0.162	-0.219	0.238	-0.296	-0.143	0.391	0.162	-0.601
203.408	-65.186	-66.284	-66.528	-66.528	-65.308	-64.941	-65.186	-31.738	-27.954	-23.56	203.408	0.162	0.162	0.162	-0.067	0.467	-0.143	0.086	0.62	0.162	-0.219
203.608	-65.186	-66.284	-66.528	-66.406	-65.308	-64.941	-65.063	-31.738	-28.076	-23.682	203.608	0.467	0.162	0.162	0.467	0.62	0.086	0.162	0.467	0.162	0.086
203.808	-65.186	-66.406	-66.406	-66.528	-65.308	-64.941	-65.063	-31.86	-28.198	-23.926	203.808	0.696	0.162	0.162	0.925	0.467	0.162	0.162	0.238	0.162	0.162
204.008	-65.186	-66.406	-66.406	-66.406	-65.308	-64.941	-65.186	-31.982	-28.32	-24.048	204.008	0.772	0.086	0.162	0.925	0.238	0.238	0.162	0.238	0.162	0.162
204.208	-65.186	-66.406	-66.406	-66.528	-65.308	-65.063	-65.063	-31.982	-28.564	-24.17	204.208	0.696	-0.143	0.162	0.544	0.162	0.544	0.238	0.391	0.162	0.162
204.408	-65.063	-66.406	-66.528	-66.406	-65.308	-65.063	-65.186	-31.982	-28.564	-24.292	204.408	0.467	-0.296	0.162	0.238	0.162	0.925	0.467	0.315	0.238	0.162
204.608	-65.186	-66.406	-66.406	-66.406	-65.308	-65.063	-65.186	-32.227	-28.687	-24.536	204.608	0.315	-0.143	0.162	0.162	0.162	1.001	0.696	0.01	0.467	0.162
204.808	-65.063	-66.406	-66.406	-66.528	-65.43	-64.941	-65.063	-32.349	-28.809	-24.658	204.808	0.544	0.086	0.162	0.162	0.162	0.925	0.849	0.01	0.62	0.162
205.008	-65.186	-66.406	-66.406	-66.406	-65.43	-65.063	-65.186	-32.349	-28.931	-24.658	205.008	0.925	0.162	0.162	0.162	0.162	1.001	1.001	0.391	0.467	0.238
205.208	-65.063	-66.406	-66.406	-66.406	-65.43	-65.063	-65.186	-32.471	-29.053	-24.902	205.208	0.925	0.162	0.162	0.162	0.162	1.001	0.925	0.544	0.238	0.544
205.408	-65.186	-66.406	-66.406	-66.406	-65.308	-65.063	-65.186	-32.593	-29.175	-25.024	205.408	0.467	0.238	0.162	0.162	0.162	0.849	0.544	0.162	0.238	0.925
205.608	-65.186	-66.406	-66.406	-66.528	-65.43	-65.063	-65.063	-32.593	-29.297	-25.269	205.608	0.01	0.467	0.238	0.162	0.162	0.696	0.315	-0.143	0.391	0.925
205.808	-65.186	-66.284	-66.406	-66.528	-65.308	-65.063	-65.063	-32.837	-29.419	-25.391	205.808	0.086	0.62	0.467	0.162	0.162	0.467	0.467	0.162	0.315	0.62
206.008	-65.063	-66.406	-66.406	-66.528	-65.43	-65.063	-65.186	-32.837	-29.541	-25.513	206.008	0.696	0.467	0.62	0.238	0.162	0.315	0.544	0.544	0.01	0.544
206.208	-65.063	-66.406	-66.406	-66.528	-65.308	-65.063	-65.186	-32.959	-29.663	-25.635	206.208	1.154	0.315	0.467	0.467	0.238	0.467	0.162	0.467	-0.143	0.544
206.408	-65.186	-66.284	-66.284	-66.406	-65.43	-65.063	-65.186	-33.081	-29.785	-25.757	206.408	1.001	0.467	0.315	0.544	0.467	0.696	-0.219	0.315	-0.219	0.162
206.608	-65.186	-66.284	-66.284	-66.528	-65.43	-65.063	-65.186	-33.203	-29.907	-26.001	206.608	0.62	0.62	0.544	0.162	0.62	0.772	-0.143	0.467	-0.372	-0.219
206.808	-65.186	-66.284	-66.406	-66.528	-65.43	-65.063	-65.186	-33.325	-30.029	-26.001	206.808	0.467	0.544	0.925	-0.296	0.544	0.696	0.086	0.62	-0.448	-0.143
207.008	-65.063	-66.284	-66.406	-66.528	-65.43	-65.063	-65.186	-33.447	-30.151	-26.123	207.008	0.315	0.544	0.925	-0.372	0.467	0.391	0.162	0.467	-0.372	0.086
207.208	-65.186	-66.284	-66.528	-66.528	-65.308	-65.063	-65.186	-33.569	-30.273	-26.245	207.208	0.01	0.696	0.62	-0.067	0.315	-0.067	0.162	0.238	-0.143	0.086
207.408	-65.186	-66.284	-66.406	-66.406	-65.43	-65.063	-65.186	-33.691	-30.396	-26.367	207.408	0.01	0.772	0.544	0.315	0.01	-0.296	0.162	0.162	0.086	-0.219
207.608	-65.186	-66.284	-66.406	-66.528	-65.43	-65.063	-65.308	-33.691	-30.396	-26.611	207.608	0.467	0.696	0.62	0.391	0.01	-0.143	0.162	0.162	0.086	-0.601
207.808	-65.063	-66.284	-66.406	-66.406	-65.43	-65.063	-65.308	-33.813	-30.64	-26.733	207.808	0.925	0.544	0.467	0.238	0.391	0.086	0.238	0.162	-0.143	-0.601
208.008	-65.186	-66.284	-66.406	-66.406	-65.43	-65.063	-65.308	-33.936	-30.64	-26.855	208.008	0.925	0.62	0.238	0.162	0.544	0.162	0.467	0.162	-0.296	-0.219
208.208	-65.186	-66.284	-66.406	-66.528	-65.43	-65.063	-65.308	-34.058	-30.762	-26.978	208.208	0.544	0.925	0.162	0.162	0.162	0.238	0.62	0.162	-0.143	0.086
208.408	-65.186	-66.284	-66.528	-66.528	-65.43	-65.063	-65.308	-34.18	-30.884	-27.1	208.408	0.238	0.849	0.162	0.162	-0.219	0.467	0.467	0.162	0.01	0.086
208.608	-65.186	-66.284	-66.528	-66.406	-65.43	-65.063	-65.308	-34.302	-30.884	-27.222	208.608	0.162	0.238	0.238	0.162	-0.219	0.62	0.238	0.162	-0.143	-0.143
208.808	-65.186	-66.284	-66.528	-66.406	-65.43	-65.063	-65.308	-34.302	-31.006	-27.344	208.808	0.162	-0.219	0.467	0.162	-0.296	0.544	0.162	0.086	-0.296	-0.296
209.008	-65.186	-66.284	-66.528	-66.406	-65.43	-65.186	-65.308	-34.424	-31.25	-27.466	209.008	0.162	-0.143	0.696	0.162	-0.601	0.544	0.238	-0.143	-0.143	-0.143
209.208	-65.186	-66.406	-66.528	-66.406	-65.43	-65.186	-65.308	-34.424	-31.372	-27.466	209.208	0.162	0.086	0.772	0.162	-0.601	0.62	0.467	-0.296	0.086	0.086
209.408	-65.186	-66.284	-66.406	-66.406	-65.43	-65.186	-65.308	-34.668	-31.372	-27.71	209.408	0.162	0.238	0.772	0.238	-0.219	0.467	0.62	-0.143	0.162	0.238
209.608	-65.186	-66.406	-66.528	-66.406	-65.43	-65.063	-65.308	-34.79	-31.494	-27.832	209.608	0.162	0.467	0.772	0.467	0.086	0.238	0.467	0.086	0.162	0.467
209.808	-65.186	-66.284	-66.528	-66.406	-65.43	-65.063	-65.308	-34.79	-31.616	-27.954	209.808	0.162	0.696	0.696	0.62	0.086	0.162	0.315	0.086	0.162	0.62
210.008	-65.186	-66.406	-66.528	-66.528	-65.552	-65.186	-65.308	-34.912	-31.738	-28.076	210.008	0.162	0.772	0.467	0.467	-0.067	0.238	0.467	-0.143	0.162	0.391
210.208	-65.186	-66.284	-66.528	-66.406	-65.552	-65.186	-65.308	-35.034	-31.86	-28.198	210.208	0.238	0.696	0.238	0.238	0.01	0.544	0.62	-0.296	0.162	-0.067
210.408	-65.186	-66.406	-66.528	-66.528	-65.43	-65.186	-65.308	-35.034	-31.982	-28.32	210.408	0.467	0.467	0.162	0.162	0.315	0.925	0.391	-0.143	0.162	-0.219
210.608	-65.186	-66.406	-66.406	-66.406	-65.552	-65.186	-65.308	-35.156	-32.104	-28.442	210.608	0.62	0.315	0.238	0.238	0.391	0.925	-0.067	0.086	0.162	0.086
210.808	-65.186	-66.406	-66.528	-66.528	-65.43	-65.186	-65.308	-35.278	-32.227	-28.564	210.808	0.467	0.544	0.544	0.467	0.238	0.544	-0.219	0.162	0.162	0.238
211.008	-65.186	-66.284	-66.528	-66.528	-65.552	-65.186	-65.308	-35.4	-32.227	-28.687	211.008	0.238	0.925	0.925	0.62	0.238	0.238	0.086	0.238	0.162	0.01
211.208	-65.186	-66.406	-66.528	-66.528	-65.552	-65.186	-65.43	-35.4	-32.471	-28.809	211.208	0.162	0.925	0.925	0.467	0.544	0.162	0.238	0.467	0.162	-0.067
211.408	-65.186	-66.406	-66.528	-66.528	-65.552	-65.186	-65.308	-35.522	-32.593	-29.053	211.408	0.162	0.62	0.544	0.238	0.925	0.162	0.01	0.62	0.162	0.086
211.608	-65.186	-66.406	-66.528	-66.528	-65.552	-65.186	-65.43	-35.645	-32.715	-29.053	211.608	0.086	0.544	0.315	0.086	0.925	0.162	-0.067	0.467	0.086	0.086
211.808	-65.186	-66.284	-66.528	-66.528	-65.552	-65.186	-65.43	-35.767	-32.837	-29.175	211.808	-0.067	0.62	0.467	-0.143	0.544	0.238	0.086	0.162	-0.219	-0.143
212.008	-65.063	-66.284	-66.406	-66.528	-65.552	-65.186	-65.308	-35.889	-32.959	-29.297	212.008	0.086	0.467	0.62	-0.219	0.238	0.467	0.162	-0.219	-0.677	-0.296
212.208	-65.063	-66.284	-66.528	-66.528	-65.552	-65.308	-65.308	-35.889	-33.081	-29.419	212.208	0.62	0.238	0.467	0.162	0.238	0.544	0.162	-0.601	-0.906	-0.143
212.408	-65.186	-66.406	-66.528	-66.406	-65.552	-65.186	-65.308	-36.133	-33.203	-29.541	212.408	0.849	0.238	0.238	0.62	0.391	0.086	0.086	-0.601	-0.677	0.086
212.609	-65.186	-66.284	-66.406	-66.528	-65.552	-65.186	-65.308	-36.133	-33.325	-29.663	212.609	0.544	0.467	0.086	0.772	0.315	-0.525	-0.143	-0.219	-0.219	0.162
212.809	-65.186	-66.284	-66.528	-66.528	-65.552	-65.186	-65.43	-36.255	-33.447	-29.785	212.809	0.238	0.62	-0.219	0.696	0.01	-0.525	-0.296	0.086	0.086	0.162
213.009	-65.186	-66.284	-66.528	-66.528	-65.552	-65.186	-65.308	-36.377	-33.447	-29.907	213.009	0.162	0.467	-0.677	0.467	-0.067	0.086	-0.219	0.162	0.162	0.162
213.209	-65.063	-66.284	-66.528	-66.528	-65.552	-65.186	-65.43	-36.377	-33.569	-29.907	213.209	0.162	0.238	-0.982	0.238	0.01	0.467	-0.219	0.086	0.086	0.086
213.409	-65.186	-66.406	-66.528	-66.528	-65.552	-65.186	-65.43	-36.499	-33.691	-30.151	213.409	0.162	0.162	-1.059	0.162	-0.219	0.086	-0.296	-0.219	-0.219	-0.143
213.609	-65.186	-66.406	-66.406	-66.528	-65.674	-65.186	-65.308	-36.499	-33.813	-30.273	213.609	0.162	0.086	-1.059	0.162	-0.601	-0.525	-0.067	-0.601	-0.601	-0.372
213.809	-65.186	-66.406	-66.528	-66.528	-65.674	-65.308	-65.43	-36.621	-33.936	-30.396	213.809	0.162	-0.219	-1.059	0.162	-0.601	-0.601	0.391	-0.601	-0.601	-0.448
214.009	-65.186	-66.284	-66.528	-66.528	-65.674	-65.186	-65.43	-36.743	-33.936	-30.396	214.009	0.162	-0.601	-0.982	0.162	-0.219	-0.219	0.62	-0.219	-0.219	-0.448
214.209	-65.186	-66.406	-66.406	-66.528	-65.552	-65.186	-65.43	-36.865	-34.058	-30.64	214.209	0.086	-0.601	-0.677	0.162	0.086	0.086	0.391	0.01	0.086	-0.525
214.409	-65.186	-66.406	-66.528	-66.528	-65.674	-65.308	-65.43	-36.987	-34.302	-30.64	214.409	-0.143	-0.296	-0.219	0.162	0.086	0.086	-0.067	-0.219	0.086	-0.677
214.609	-65.186	-66.406	-66.528	-66.528	-65.674	-65.308	-65.43	-37.109	-34.302	-30.884	214.609	-0.219	-0.296	0.01	0.086	-0.067	-0.143	-0.296	-0.601	-0.219	-0.601
214.809	-65.186	-66.406	-66.406	-66.528	-65.674	-65.186	-65.43	-37.231	-34.302	-30.884	214.809	0.162	-0.677	-0.219	-0.143	0.01	-0.372	-0.219	-0.601	-0.677	-0.219
215.009	-65.186	-66.406	-66.528	-66.528	-65.674	-65.186	-65.43	-37.231	-34.546	-31.006	215.009	0.467	-0.83	-0.601	-0.296	0.238	-0.525	-0.219	-0.296	-0.906	0.086
215.209	-65.186	-66.406	-66.406	-66.528	-65.674	-65.308	-65.43	-37.354	-34.546	-31.128	215.209	0.162	-0.372	-0.677	-0.143	0.01	-0.753	-0.296	-0.219	-0.677	0.086
215.409	-65.186	-66.406	-66.528	-66.528	-65.674	-65.308	-65.43	-37.476	-34.668	-31.25	215.409	-0.219	0.238	-0.601	0.086	-0.525	-0.906	-0.143	-0.372	-0.296	-0.143
215.609	-65.186	-66.406	-66.528	-66.528	-65.674	-65.308	-65.43	-37.598	-34.79	-31.372	215.609	-0.143	0.315	-0.753	0.086	-0.601	-0.677	0.086	-0.525	-0.219	-0.296
215.809	-65.186	-66.528	-66.528	-66.528	-65.674	-65.308	-65.43	-37.598	-34.912	-31.494	215.809	0.086	-0.143	-0.982	-0.143	-0.296	-0.219	0.162	-0.753	-0.372	-0.143
216.009	-65.063	-66.406	-66.528	-66.528	-65.674	-65.308	-65.43	-37.72	-35.034	-31.616	216.009	0.086	-0.601	-1.059	-0.372	-0.296	0.01	0.162	-0.906	-0.448	0.01
216.209	-65.186	-66.406	-66.528	-66.528	-65.674	-65.308	-65.552	-37.842	-35.156	-31.616	216.209	-0.143	-0.601	-1.059	-0.448	-0.601	-0.143	0.162	-0.677	-0.448	-0.143
216.409	-65.186	-66.528	-66.406	-66.406	-65.674	-65.308	-65.552	-37.964	-35.278	-31.86	216.409	-0.296	-0.296	-1.059	-0.448	-0.601	-0.372	0.162	-0.296	-0.448	-0.296
216.609	-65.186	-66.406	-66.528	-66.528	-65.674	-65.308	-65.552	-37.842	-35.4	-31.982	216.609	-0.143	-0.219	-0.982	-0.448	-0.219	-0.448	0.086	-0.219	-0.372	-0.143
216.809	-65.186	-66.406	-66.406	-66.528	-65.674	-65.308	-65.43	-38.086	-35.4	-32.104	216.809	0.01	-0.296	-0.677	-0.372	0.01	-0.372	-0.143	-0.296	-0.219	0.086
217.009	-65.186	-66.406	-66.528	-66.528	-65.674	-65.43	-65.43	-38.208	-35.522	-32.227	217.009	-0.143	-0.143	-0.219	-0.143	-0.143	-0.143	-0.296	-0.143	-0.219	0.086
217.209	-65.186	-66.406	-66.528	-66.528	-65.674	-65.43	-65.552	-38.33	-35.645	-32.349	217.209	-0.296	0.086	0.01	0.086	-0.296	0.086	-0.143	0.086	-0.296	-0.143
217.409	-65.186	-66.406	-66.528	-66.528	-65.674	-65.43	-65.43	-38.33	-35.767	-32.349	217.409	-0.143	0.086	-0.219	0.086	-0.143	0.086	0.01	0.086	-0.143	-0.296
217.609	-65.186	-66.406	-66.528	-66.528	-65.674	-65.43	-65.43	-38.452	-35.889	-32.471	217.609	0.086	-0.143	-0.601	-0.143	0.01	-0.219	-0.219	-0.143	0.01	-0.219
217.809	-65.063	-66.528	-66.528	-66.528	-65.674	-65.43	-65.552	-38.452	-36.011	-32.593	217.809	0.162	-0.296	-0.601	-0.296	-0.143	-0.601	-0.601	-0.372	-0.067	-0.219
218.009	-65.063	-66.406	-66.528	-66.528	-65.674	-65.43	-65.43	-38.574	-36.133	-32.715	218.009	0.162	-0.143	-0.296	-0.143	-0.296	-0.601	-0.601	-0.525	-0.067	-0.372
218.209	-65.063	-66.528	-66.528	-66.528	-65.552	-65.43	-65.43	-38.574	-36.255	-32.837	218.209	0.162	0.086	-0.296	0.086	-0.143	-0.296	-0.219	-0.753	0.01	-0.448
218.409	-65.186	-66.406	-66.528	-66.528	-65.674	-65.43	-65.43	-38.696	-36.377	-32.959	218.409	0.162	0.162	-0.601	0.162	0.086	-0.296	0.086	-0.906	-0.143	-0.448
218.609	-65.186	-66.406	-66.528	-66.528	-65.674	-65.43	-65.43	-38.818	-36.499	-33.081	218.609	0.086	0.162	-0.601	0.162	0.162	-0.601	0.162	-0.677	-0.372	-0.525
218.809	-65.186	-66.406	-66.528	-66.528	-65.674	-65.43	-65.43	-38.94	-36.621	-33.203	218.809	-0.067	0.162	-0.219	0.162	0.162	-0.601	0.162	-0.219	-0.448	-0.677
219.009	-65.186	-66.406	-66.528	-66.528	-65.674	-65.43	-65.43	-39.062	-36.743	-33.203	219.009	0.01	0.162	0.01	0.086	0.162	-0.219	0.162	0.086	-0.525	-0.601
219.209	-65.186	-66.406	-66.528	-66.528	-65.674	-65.43	-65.43	-39.185	-36.743	-33.325	219.209	0.315	0.086	-0.143	-0.219	0.162	0.086	0.162	0.086	-0.677	-0.296
219.409	-65.186	-66.406	-66.528	-66.406	-65.674	-65.43	-65.43	-39.185	-36.865	-33.447	219.409	0.315	-0.143	-0.296	-0.601	0.162	0.086	0.162	-0.143	-0.601	-0.296
219.609	-65.063	-66.406	-66.406	-66.528	-65.674	-65.43	-65.43	-39.307	-36.987	-33.569	219.609	-0.067	-0.372	-0.143	-0.601	0.162	-0.219	0.162	-0.219	-0.219	-0.677
219.809	-65.063	-66.406	-66.528	-66.528	-65.674	-65.43	-65.43	-39.429	-37.109	-33.691	219.809	-0.296	-0.448	0.01	-0.219	0.162	-0.601	0.162	0.086	0.01	-0.982
220.009	-65.186	-66.406	-66.528	-66.528	-65.674	-65.43	-65.43	-39.429	-37.231	-33.691	220.009	-0.143	-0.372	-0.219	0.01	0.086	-0.601	0.086	0.238	-0.219	-1.059
220.209	-65.186	-66.406	-66.528	-66.528	-65.796	-65.43	-65.43	-39.551	-37.231	-33.813	220.209	0.086	-0.143	-0.601	-0.143	-0.143	-0.219	-0.143	-0.067	-0.677	-1.059
220.409	-65.186	-66.406	-66.528	-66.528	-65.796	-65.43	-65.43	-39.673	-37.476	-33.936	220.409	0.086	0.086	-0.601	-0.296	-0.296	0.086	-0.296	-0.372	-0.906	-0.982
220.609	-65.186	-66.406	-66.528	-66.528	-65.796	-65.43	-65.43	-39.795	-37.476	-34.18	220.609	-0.219	0.162	-0.296	-0.219	-0.143	0.162	-0.219	-0.296	-0.677	-0.753
220.809	-65.186	-66.406	-66.528	-66.528	-65.796	-65.43	-65.552	-39.795	-37.598	-34.18	220.809	-0.601	0.162	-0.296	-0.219	0.086	0.162	-0.219	0.086	-0.296	-0.525
221.009	-65.186	-66.406	-66.528	-66.528	-65.674	-65.43	-65.552	-39.917	-37.72	-34.302	221.009	-0.601	0.162	-0.677	-0.219	0.162	0.162	-0.296	0.162	-0.219	-0.372
221.209	-65.186	-66.406	-66.528	-66.528	-65.674	-65.43	-65.43	-40.039	-37.72	-34.424	221.209	-0.219	0.162	-0.906	0.238	0.086	0.162	-0.143	-0.372	-0.296	-0.143
221.409	-65.186	-66.406	-66.528	-66.406	-65.674	-65.43	-65.43	-40.161	-37.842	-34.424	221.409	0.086	0.162	-0.677	0.849	-0.143	0.162	0.086	-0.83	-0.143	0.086
221.609	-65.186	-66.406	-66.528	-66.528	-65.674	-65.552	-65.43	-40.161	-37.964	-34.546	221.609	0.162	0.162	-0.296	0.925	-0.296	0.162	0.162	-0.677	0.086	0.162
221.809	-65.186	-66.406	-66.528	-66.406	-65.674	-65.552	-65.552	-40.283	-38.086	-34.79	221.809	0.162	0.162	-0.296	0.544	-0.143	0.162	0.162	-0.219	0.162	0.162
222.009	-65.186	-66.406	-66.528	-66.528	-65.674	-65.43	-65.552	-40.283	-38.086	-34.912	222.009	0.086	0.162	-0.601	0.238	0.086	0.162	0.162	0.086	0.086	0.162
222.209	-65.186	-66.406	-66.528	-66.406	-65.796	-65.43	-65.552	-40.405	-38.208	-34.912	222.209	-0.219	0.162	-0.601	0.162	0.162	0.162	0.238	0.162	-0.143	0.162
222.409	-65.186	-66.406	-66.528	-66.406	-65.796	-65.43	-65.552	-40.527	-38.33	-35.156	222.409	-0.601	0.086	-0.219	0.162	0.238	0.162	0.467	0.086	-0.296	0.162
222.609	-65.186	-66.406	-66.528	-66.528	-65.674	-65.43	-65.552	-40.649	-38.452	-35.278	222.609	-0.601	-0.219	0.086	0.162	0.467	0.162	0.62	-0.067	-0.219	0.238
222.809	-65.186	-66.406	-66.528	-66.528	-65.674	-65.552	-65.552	-40.771	-38.452	-35.278	222.809	-0.219	-0.601	0.238	0.162	0.62	0.162	0.544	0.01	-0.219	0.467
223.009	-65.186	-66.406	-66.528	-66.406	-65.674	-65.552	-65.552	-40.771	-38.574	-35.522	223.009	0.086	-0.601	0.544	0.162	0.467	0.162	0.544	0.315	-0.219	0.62
223.209	-65.186	-66.406	-66.528	-66.528	-65.674	-65.552	-65.552	-40.894	-38.696	-35.522	223.209	0.162	-0.219	1.001	0.162	0.238	0.162	0.62	0.391	0.162	0.467
223.409	-65.063	-66.406	-66.528	-66.528	-65.674	-65.552	-65.552	-41.016	-38.818	-35.645	223.409	0.162	0.086	1.23	0.162	0.162	0.238	0.544	0.238	0.544	0.315
223.609	-65.063	-66.406	-66.406	-66.406	-65.674	-65.552	-65.552	-41.016	-38.94	-35.767	223.609	0.162	0.162	1.001	0.162	0.162	0.467	0.544	0.162	0.467	0.467
223.809	-65.063	-66.406	-66.406	-66.406	-65.674	-65.43	-65.552	-41.138	-39.062	-35.889	223.809	0.162	0.162	0.544	0.162	0.162	0.62	0.696	0.086	0.238	0.62
224.009	-65.063	-66.406	-66.406	-66.528	-65.674	-65.552	-65.552	-41.138	-39.062	-36.011	224.009	0.086	0.162	0.238	0.086	0.238	0.467	0.849	-0.143	0.238	0.467
224.209	-65.063	-66.406	-66.406	-66.528	-65.796	-65.43	-65.552	-41.26	-39.185	-36.133	224.209	-0.143	0.162	0.238	-0.143	0.467	0.238	1.001	-0.296	0.467	0.315
224.409	-65.063	-66.406	-66.406	-66.528	-65.674	-65.552	-65.552	-41.382	-39.307	-36.255	224.409	-0.296	0.162	0.544	-0.296	0.62	0.162	0.925	-0.143	0.62	0.467
224.609	-65.063	-66.406	-66.406	-66.528	-65.674	-65.552	-65.552	-41.504	-39.429	-36.255	224.609	-0.143	0.162	1.001	-0.067	0.467	0.162	0.467	0.086	0.544	0.62
224.809	-65.063	-66.284	-66.406	-66.528	-65.674	-65.552	-65.552	-41.626	-39.551	-36.377	224.809	0.01	0.162	1.307	0.467	0.315	0.162	0.01	0.162	0.544	0.467
225.009	-65.063	-66.406	-66.406	-66.528	-65.796	-65.43	-65.552	-41.626	-39.673	-36.499	225.009	-0.143	0.162	1.307	0.925	0.544	0.162	0.086	0.162	0.62	0.238
225.209	-65.186	-66.406	-66.406	-66.528	-65.796	-65.552	-65.552	-41.748	-39.795	-36.621	225.209	-0.219	0.162	1.078	0.849	0.925	0.238	0.696	0.238	0.467	0.162
225.409	-65.063	-66.406	-66.406	-66.528	-65.796	-65.552	-65.552	-41.87	-39.795	-36.621	225.409	0.086	0.162	0.925	0.238	0.925	0.467	1.154	0.467	0.162	0.162
225.609	-65.063	-66.406	-66.406	-66.528	-65.796	-65.552	-65.552	-41.992	-40.039	-36.743	225.609	0.315	0.238	1.001	-0.143	0.62	0.62	1.001	0.62	-0.143	0.162
225.809	-65.063	-66.406	-66.406	-66.528	-65.674	-65.552	-65.552	-41.992	-40.039	-36.987	225.809	0.315	0.544	1.001	0.162	0.544	0.467	0.62	0.544	-0.296	0.162
226.009	-65.063	-66.406	-66.406	-66.528	-65.796	-65.552	-65.552	-42.114	-40.161	-37.109	226.009	0.467	1.001	0.849	0.544	0.62	0.238	0.544	0.544	-0.067	0.162
226.209	-65.063	-66.406	-66.406	-66.528	-65.796	-65.552	-65.43	-42.236	-40.283	-37.231	226.209	0.772	1.23	0.696	0.467	0.467	0.162	0.62	0.62	0.391	0.162
226.409	-65.063	-66.406	-66.406	-66.528	-65.796	-65.43	-65.552	-42.236	-40.405	-37.354	226.409	1.078	1.001	0.544	0.315	0.238	0.162	0.467	0.467	0.62	0.162
226.609	-65.063	-66.406	-66.406	-66.528	-65.796	-65.552	-65.552	-42.48	-40.527	-37.476	226.609	1.23	0.544	0.62	0.467	0.162	0.086	0.162	0.238	0.544	0.162
226.809	-65.063	-66.406	-66.406	-66.528	-65.796	-65.43	-65.552	-42.48	-40.649	-37.476	226.809	1.001	0.238	0.925	0.62	0.162	-0.067	-0.143	0.162	0.544	0.162
227.009	-65.063	-66.406	-66.406	-66.528	-65.796	-65.552	-65.552	-42.603	-40.771	-37.598	227.009	0.62	0.162	0.925	0.467	0.162	0.01	-0.296	0.238	0.62	0.238
227.209	-65.063	-66.406	-66.406	-66.528	-65.796	-65.43	-65.552	-42.725	-40.771	-37.72	227.209	0.544	0.162	0.62	0.315	0.238	0.315	-0.143	0.391	0.467	0.467
227.409	-65.063	-66.406	-66.406	-66.528	-65.796	-65.552	-65.552	-42.847	-40.894	-37.842	227.409	0.62	0.238	0.544	0.467	0.467	0.391	0.086	0.315	0.315	0.544
227.609	-65.063	-66.406	-66.406	-66.528	-65.796	-65.552	-65.552	-42.847	-41.016	-37.964	227.609	0.467	0.467	0.62	0.62	0.62	0.315	0.238	0.086	0.467	0.162
227.809	-65.063	-66.406	-66.528	-66.406	-65.796	-65.552	-65.674	-42.969	-41.138	-38.086	227.809	0.238	0.62	0.467	0.467	0.467	0.467	0.467	0.315	0.62	-0.219
228.009	-65.063	-66.406	-66.406	-66.528	-65.796	-65.552	-65.552	-42.969	-41.138	-38.208	228.009	0.238	0.467	0.315	0.315	0.315	0.62	0.62	0.849	0.467	-0.143
228.209	-65.063	-66.406	-66.406	-66.528	-65.796	-65.552	-65.674	-43.091	-41.26	-38.208	228.209	0.467	0.238	0.544	0.544	0.467	0.467	0.544	0.925	0.238	0.01
228.409	-65.063	-66.406	-66.406	-66.528	-65.796	-65.552	-65.552	-43.213	-41.382	-38.33	228.409	0.62	0.162	0.925	0.925	0.62	0.238	0.544	0.544	0.162	-0.143
228.609	-65.063	-66.406	-66.406	-66.528	-65.796	-65.552	-65.674	-43.335	-41.504	-38.452	228.609	0.467	0.162	0.925	0.925	0.467	0.238	0.544	0.315	0.162	-0.296
228.809	-65.063	-66.406	-66.406	-66.528	-65.796	-65.552	-65.674	-43.335	-41.504	-38.574	228.809	0.238	0.086	0.544	0.544	0.315	0.467	0.162	0.467	0.162	-0.143
229.009	-65.063	-66.406	-66.406	-66.528	-65.796	-65.552	-65.674	-43.457	-41.626	-38.574	229.009	0.162	-0.143	0.238	0.315	0.467	0.62	-0.143	0.62	0.162	0.086
229.209	-65.063	-66.406	-66.406	-66.528	-65.796	-65.552	-65.674	-43.579	-41.748	-38.696	229.209	0.238	-0.296	0.162	0.467	0.544	0.467	0.238	0.467	0.162	0.162
229.409	-65.063	-66.406	-66.406	-66.528	-65.796	-65.552	-65.674	-43.701	-41.87	-38.818	229.409	0.467	-0.143	0.162	0.62	0.162	0.315	0.849	0.238	0.162	0.162
229.609	-65.063	-66.406	-66.406	-66.528	-65.796	-65.552	-65.674	-43.701	-41.992	-38.94	229.609	0.62	0.086	0.238	0.467	-0.219	0.467	0.849	0.162	0.162	0.238
229.809	-65.063	-66.406	-66.406	-66.528	-65.796	-65.552	-65.674	-43.701	-41.992	-39.062	229.809	0.391	0.162	0.467	0.238	-0.143	0.62	0.238	0.086	0.086	0.467
230.009	-65.063	-66.406	-66.406	-66.528	-65.796	-65.552	-65.674	-43.823	-42.114	-39.185	230.009	-0.067	0.238	0.62	0.162	0.162	0.467	-0.143	-0.143	-0.143	0.62
230.209	-65.063	-66.406	-66.406	-66.528	-65.918	-65.674	-65.674	-44.067	-42.236	-39.307	230.209	-0.296	0.467	0.467	0.162	0.467	0.238	0.238	-0.219	-0.296	0.467
230.409	-65.063	-66.406	-66.406	-66.528	-65.918	-65.552	-65.674	-44.067	-42.358	-39.307	230.409	-0.067	0.62	0.238	0.238	0.62	0.162	0.849	0.162	-0.143	0.238
230.609	-65.063	-66.406	-66.406	-66.528	-65.918	-65.552	-65.674	-44.189	-42.358	-39.429	230.609	0.391	0.467	0.162	0.544	0.544	0.162	1.001	0.544	0.086	0.162
230.809	-65.063	-66.406	-66.406	-66.528	-65.918	-65.552	-65.674	-44.189	-42.603	-39.551	230.809	0.62	0.315	0.238	1.001	0.544	0.238	0.849	0.467	0.162	0.162
231.009	-65.063	-66.406	-66.406	-66.528	-65.796	-65.552	-65.674	-44.312	-42.603	-39.673	231.009	0.467	0.467	0.467	1.23	0.62	0.467	0.696	0.315	0.162	0.162
231.209	-65.063	-66.406	-66.406	-66.528	-65.918	-65.552	-65.674	-44.312	-42.725	-39.795	231.209	0.238	0.62	0.62	1.001	0.544	0.696	0.544	0.467	0.162	0.162
231.409	-65.063	-66.406	-66.528	-66.528	-65.918	-65.552	-65.674	-44.434	-42.847	-39.917	231.409	0.162	0.467	0.467	0.544	0.62	0.772	0.544	0.544	0.162	0.162
231.609	-65.063	-66.406	-66.406	-66.528	-65.918	-65.552	-65.674	-44.556	-42.969	-40.039	231.609	0.162	0.238	0.238	0.238	0.849	0.696	0.62	0.162	0.162	0.086
231.809	-65.063	-66.406	-66.406	-66.528	-65.918	-65.552	-65.552	-44.678	-43.091	-40.039	231.809	0.162	0.238	0.162	0.162	0.62	0.467	0.467	-0.219	0.162	-0.219
232.009	-65.063	-66.406	-66.406	-66.528	-65.918	-65.552	-65.674	-44.678	-43.213	-40.161	232.009	0.238	0.467	0.162	0.162	0.162	0.238	0.238	-0.143	0.162	-0.677
232.209	-64.941	-66.406	-66.406	-66.528	-65.918	-65.552	-65.674	-44.8	-43.335	-40.283	232.209	0.544	0.62	0.162	0.162	0.238	0.162	0.086	0.01	0.086	-0.906
232.409	-64.941	-66.406	-66.528	-66.528	-65.918	-65.552	-65.674	-44.922	-43.457	-40.405	232.409	0.925	0.467	0.162	0.162	0.544	0.162	-0.143	-0.143	-0.143	-0.753
232.609	-65.063	-66.528	-66.528	-66.528	-65.918	-65.674	-65.674	-44.922	-43.457	-40.527	232.609	0.925	0.315	0.162	0.162	0.391	0.162	-0.296	-0.296	-0.296	-0.601
232.809	-64.941	-66.528	-66.406	-66.528	-65.918	-65.552	-65.674	-45.044	-43.701	-40.649	232.809	0.544	0.467	0.162	0.162	-0.067	0.162	-0.067	-0.067	-0.143	-0.753
233.009	-65.063	-66.406	-66.528	-66.528	-65.918	-65.552	-65.674	-45.166	-43.701	-40.771	233.009	0.238	0.62	0.162	0.162	-0.219	0.238	0.315	0.391	0.086	-0.906
233.209	-65.063	-66.528	-66.528	-66.528	-65.918	-65.552	-65.674	-45.166	-43.701	-40.894	233.209	0.162	0.391	0.162	0.162	0.162	0.467	0.315	0.544	0.162	-0.677
233.409	-65.063	-66.406	-66.406	-66.528	-65.918	-65.552	-65.674	-45.288	-43.823	-40.894	233.409	0.086	-0.067	0.162	0.162	0.544	0.544	0.01	0.162	0.162	-0.219
233.609	-65.063	-66.528	-66.528	-66.528	-65.918	-65.43	-65.674	-45.41	-43.945	-41.016	233.609	-0.219	-0.296	0.162	0.162	0.467	0.162	-0.067	-0.219	0.162	0.01
233.809	-64.941	-66.528	-66.528	-66.528	-65.918	-65.552	-65.674	-45.532	-44.067	-41.138	233.809	-0.601	-0.143	0.162	0.086	0.238	-0.296	0.086	-0.143	0.162	-0.143
234.009	-65.063	-66.406	-66.406	-66.528	-65.918	-65.552	-65.796	-45.532	-44.189	-41.26	234.009	-0.601	0.086	0.086	-0.143	0.162	-0.448	0.162	0.01	0.086	-0.296
234.209	-65.063	-66.406	-66.528	-66.65	-65.918	-65.43	-65.796	-45.654	-44.189	-41.382	234.209	-0.219	0.162	-0.143	-0.296	0.086	-0.372	0.086	-0.143	-0.143	-0.143
234.409	-65.063	-66.406	-66.528	-66.528	-65.918	-65.552	-65.796	-45.776	-44.189	-41.382	234.409	0.086	0.162	-0.296	-0.143	-0.219	-0.219	-0.219	-0.372	-0.296	0.01
234.609	-65.063	-66.406	-66.406	-66.528	-65.918	-65.552	-65.796	-45.776	-44.434	-41.504	234.609	0.086	0.162	-0.143	0.086	-0.601	-0.219	-0.601	-0.525	-0.143	-0.219
234.809	-65.063	-66.406	-66.528	-66.528	-65.918	-65.552	-65.796	-45.898	-44.434	-41.626	234.809	-0.143	0.162	0.01	0.086	-0.601	-0.296	-0.753	-0.677	0.01	-0.601
235.009	-65.063	-66.406	-66.528	-66.528	-65.918	-65.552	-65.796	-46.021	-44.556	-41.748	235.009	-0.296	0.162	-0.219	-0.143	-0.219	-0.219	-0.83	-0.601	-0.219	-0.601
235.209	-65.063	-66.406	-66.528	-66.528	-65.918	-65.552	-65.796	-46.143	-44.678	-41.87	235.209	-0.143	0.162	-0.601	-0.296	0.086	-0.296	-0.906	-0.219	-0.525	-0.296
235.409	-65.063	-66.406	-66.528	-66.65	-65.918	-65.552	-65.796	-46.143	-44.8	-41.87	235.409	0.086	0.162	-0.601	-0.143	0.086	-0.601	-0.753	0.086	-0.296	-0.296
235.609	-65.063	-66.406	-66.528	-66.65	-65.918	-65.552	-65.796	-46.265	-44.8	-41.992	235.609	0.162	0.162	-0.219	0.01	-0.143	-0.677	-0.448	0.162	0.162	-0.601
235.809	-65.063	-66.406	-66.406	-66.65	-66.04	-65.552	-65.796	-46.265	-44.922	-42.114	235.809	0.162	0.162	0.086	-0.219	-0.296	-0.525	-0.219	0.086	0.086	-0.601
236.009	-65.063	-66.406	-66.528	-66.65	-65.918	-65.552	-65.796	-46.387	-45.044	-42.236	236.009	0.086	0.162	0.162	-0.601	-0.143	-0.372	-0.219	-0.219	-0.296	-0.219
236.209	-65.063	-66.406	-66.406	-66.528	-66.04	-65.674	-65.796	-46.509	-45.044	-42.358	236.209	-0.219	0.162	0.162	-0.677	0.01	-0.219	-0.296	-0.677	-0.525	0.01
236.409	-65.063	-66.406	-66.528	-66.65	-66.04	-65.552	-65.796	-46.509	-45.166	-42.48	236.409	-0.601	0.162	0.086	-0.525	-0.143	-0.219	-0.143	-0.906	-0.753	-0.219
236.609	-65.063	-66.406	-66.528	-66.528	-65.918	-65.552	-65.674	-46.631	-45.288	-42.48	236.609	-0.601	0.086	-0.219	-0.372	-0.219	-0.296	0.086	-0.753	-0.906	-0.601
236.809	-65.063	-66.528	-66.528	-66.528	-66.04	-65.552	-65.674	-46.631	-45.41	-42.603	236.809	-0.296	-0.143	-0.601	-0.143	0.086	-0.143	0.086	-0.525	-0.677	-0.601
237.009	-65.063	-66.406	-66.406	-66.528	-65.918	-65.552	-65.796	-46.753	-45.41	-42.725	237.009	-0.296	-0.296	-0.601	0.086	0.162	0.086	-0.143	-0.372	-0.219	-0.296
237.209	-65.063	-66.406	-66.406	-66.528	-65.918	-65.674	-65.796	-46.875	-45.654	-42.847	237.209	-0.601	-0.143	-0.219	0.086	-0.296	0.162	-0.296	-0.143	0.01	-0.296
237.409	-65.063	-66.406	-66.406	-66.528	-66.04	-65.674	-65.674	-46.875	-45.654	-42.969	237.409	-0.601	0.01	0.086	-0.219	-0.448	0.162	-0.143	0.01	-0.219	-0.677
237.61	-65.063	-66.406	-66.406	-66.528	-65.918	-65.552	-65.796	-46.997	-45.776	-43.091	237.61	-0.219	-0.143	0.162	-0.525	0.086	0.162	0.086	-0.219	-0.677	-0.906
237.81	-65.063	-66.528	-66.406	-66.528	-65.918	-65.552	-65.674	-46.997	-45.898	-43.091	237.81	0.01	-0.296	0.162	-0.296	0.544	0.086	0.162	-0.677	-0.906	-0.677
238.01	-65.063	-66.528	-66.528	-66.528	-65.918	-65.552	-65.674	-47.241	-46.021	-43.335	238.01	-0.219	-0.143	0.162	0.238	0.467	-0.143	0.162	-0.982	-0.753	-0.296
238.21	-65.063	-66.528	-66.406	-66.528	-65.918	-65.552	-65.674	-47.241	-46.021	-43.335	238.21	-0.601	0.086	0.162	0.315	0.238	-0.219	0.162	-0.982	-0.525	-0.219
238.41	-65.063	-66.528	-66.406	-66.528	-65.918	-65.674	-65.674	-47.241	-46.143	-43.457	238.41	-0.601	0.162	0.162	-0.067	0.162	0.162	0.086	-0.677	-0.448	-0.296
238.61	-65.063	-66.528	-66.528	-66.528	-65.918	-65.552	-65.796	-47.363	-46.265	-43.579	238.61	-0.219	0.162	0.086	-0.296	0.086	0.467	-0.219	-0.219	-0.448	-0.143
238.81	-64.941	-66.528	-66.528	-66.528	-65.918	-65.674	-65.674	-47.485	-46.265	-43.701	238.81	0.086	0.162	-0.143	-0.143	-0.219	0.086	-0.601	0.01	-0.372	0.086
239.01	-65.063	-66.528	-66.406	-66.528	-66.04	-65.674	-65.796	-47.607	-46.387	-43.701	239.01	0.162	0.162	-0.296	0.086	-0.601	-0.525	-0.601	-0.143	-0.143	0.162
239.21	-65.063	-66.528	-66.406	-66.528	-66.04	-65.674	-65.796	-47.729	-46.509	-43.823	239.21	0.162	0.086	-0.219	0.086	-0.525	-0.601	-0.219	-0.296	0.086	0.162
239.41	-65.063	-66.406	-66.406	-66.528	-66.04	-65.674	-65.796	-47.729	-46.509	-43.945	239.41	0.162	-0.219	-0.219	-0.143	0.086	-0.219	0.01	-0.143	0.086	0.238
239.61	-65.063	-66.528	-66.406	-66.406	-66.04	-65.552	-65.796	-47.729	-46.631	-44.067	239.61	0.162	-0.601	-0.296	-0.296	0.467	0.01	-0.219	0.01	-0.143	0.467
239.81	-65.063	-66.406	-66.406	-66.528	-66.04	-65.674	-65.796	-47.852	-46.753	-44.189	239.81	0.162	-0.601	-0.143	-0.143	0.162	-0.143	-0.601	-0.143	-0.296	0.544
240.01	-65.063	-66.406	-66.406	-66.528	-66.04	-65.674	-65.796	-47.974	-46.753	-44.189	240.01	0.162	-0.219	0.086	0.086	-0.219	-0.296	-0.601	-0.296	-0.143	0.162
240.21	-65.063	-66.406	-66.406	-66.528	-66.04	-65.674	-65.796	-47.974	-46.875	-44.312	240.21	0.086	0.086	0.162	0.086	-0.219	-0.143	-0.219	-0.143	0.086	-0.219
240.41	-64.941	-66.406	-66.528	-66.528	-66.04	-65.674	-65.796	-48.096	-46.997	-44.434	240.41	-0.143	0.086	0.162	-0.219	-0.219	0.086	0.01	0.086	0.162	-0.143
240.61	-65.063	-66.406	-66.528	-66.528	-66.04	-65.674	-65.796	-48.096	-46.997	-44.556	240.61	-0.296	-0.143	0.086	-0.601	-0.372	0.086	-0.143	0.162	0.162	0.086
240.81	-65.063	-66.406	-66.406	-66.528	-65.918	-65.674	-65.796	-48.218	-47.119	-44.556	240.81	-0.143	-0.296	-0.219	-0.601	-0.448	-0.219	-0.296	0.162	0.162	0.162
241.01	-65.063	-66.406	-66.406	-66.528	-66.04	-65.552	-65.796	-48.218	-47.241	-44.8	241.01	0.086	-0.143	-0.677	-0.219	-0.372	-0.601	-0.143	0.162	0.086	0.162
241.21	-65.063	-66.406	-66.528	-66.528	-65.918	-65.674	-65.796	-48.34	-47.241	-44.8	241.21	0.162	0.086	-0.906	0.086	-0.143	-0.601	0.01	0.086	-0.143	0.162
241.41	-65.063	-66.406	-66.528	-66.528	-66.04	-65.674	-65.796	-48.34	-47.363	-44.8	241.41	0.086	0.162	-0.677	0.162	0.086	-0.296	-0.143	-0.219	-0.296	0.162
241.61	-65.063	-66.406	-66.406	-66.528	-65.918	-65.674	-65.918	-48.462	-47.485	-44.922	241.61	-0.143	0.162	-0.219	0.162	0.162	-0.296	-0.219	-0.601	-0.143	0.162
241.81	-65.063	-66.406	-66.406	-66.406	-66.04	-65.674	-65.918	-48.462	-47.607	-45.044	241.81	-0.296	0.086	0.01	0.086	0.238	-0.601	0.162	-0.525	0.086	0.162
242.01	-65.063	-66.406	-66.406	-66.528	-66.04	-65.674	-65.796	-48.584	-47.607	-45.044	242.01	-0.143	-0.143	-0.143	-0.143	0.467	-0.601	0.544	0.01	0.162	0.162
242.21	-65.063	-66.406	-66.406	-66.528	-66.04	-65.674	-65.918	-48.706	-47.729	-45.166	242.21	0.086	-0.296	-0.372	-0.296	0.62	-0.219	0.391	0.238	0.086	0.162
242.41	-65.063	-66.406	-66.528	-66.528	-65.918	-65.674	-65.918	-48.706	-47.729	-45.288	242.41	0.162	-0.143	-0.448	-0.143	0.467	0.086	-0.067	0.01	-0.143	0.162
242.61	-65.063	-66.406	-66.406	-66.528	-66.04	-65.674	-65.918	-48.828	-47.852	-45.41	242.61	0.162	0.01	-0.448	0.086	0.238	0.162	-0.296	0.01	-0.296	0.162
242.81	-65.063	-66.406	-66.406	-66.528	-66.04	-65.552	-65.918	-48.828	-48.096	-45.532	242.81	0.162	-0.143	-0.448	0.162	0.238	0.162	-0.143	0.391	-0.067	0.238
243.01	-65.063	-66.406	-66.406	-66.528	-66.04	-65.674	-65.796	-48.95	-48.096	-45.654	243.01	0.162	-0.372	-0.372	0.162	0.467	0.238	0.086	0.62	0.467	0.467
243.21	-64.941	-66.406	-66.406	-66.528	-66.04	-65.674	-65.796	-49.072	-48.218	-45.776	243.21	0.162	-0.448	-0.143	0.162	0.62	0.467	0.238	0.467	1.001	0.62
243.41	-65.063	-66.406	-66.406	-66.528	-66.04	-65.674	-65.796	-49.194	-48.34	-45.776	243.41	0.238	-0.372	0.086	0.162	0.467	0.544	0.544	0.238	1.23	0.467
243.61	-64.941	-66.528	-66.406	-66.528	-66.04	-65.674	-65.796	-49.194	-48.34	-45.776	243.61	0.467	-0.143	0.162	0.162	0.238	0.162	0.925	0.162	1.001	0.238
243.81	-65.063	-66.406	-66.406	-66.528	-66.04	-65.674	-65.918	-49.194	-48.462	-45.898	243.81	0.62	0.086	0.162	0.162	0.162	-0.219	0.925	0.162	0.544	0.162
244.01	-65.063	-66.406	-66.406	-66.528	-66.04	-65.552	-65.796	-49.316	-48.584	-46.021	244.01	0.467	0.162	0.162	0.238	0.086	-0.143	0.544	0.162	0.238	0.162
244.21	-65.063	-66.406	-66.406	-66.528	-66.04	-65.674	-65.918	-49.438	-48.706	-46.265	244.21	0.238	0.238	0.162	0.467	-0.143	0.086	0.315	0.162	0.238	0.162
244.41	-65.063	-66.406	-66.406	-66.528	-66.04	-65.796	-65.796	-49.438	-48.706	-46.265	244.41	0.162	0.467	0.162	0.544	-0.219	0.238	0.467	0.238	0.467	0.162
244.61	-64.941	-66.406	-66.406	-66.528	-66.04	-65.674	-65.796	-49.561	-48.828	-46.387	244.61	0.162	0.62	0.162	0.086	0.238	0.467	0.62	0.467	0.62	0.162
244.81	-65.063	-66.406	-66.406	-66.528	-65.918	-65.674	-65.796	-49.561	-48.828	-46.509	244.81	0.162	0.391	0.162	-0.525	0.925	0.696	0.467	0.62	0.391	0.162
245.01	-64.941	-66.528	-66.406	-66.528	-66.04	-65.674	-65.796	-49.683	-48.95	-46.509	245.01	0.162	0.01	0.162	-0.601	1.23	0.772	0.315	0.467	-0.067	0.162
245.21	-65.063	-66.528	-66.406	-66.528	-65.918	-65.674	-65.796	-49.805	-49.072	-46.631	245.21	0.162	0.01	0.162	-0.219	1.001	0.772	0.467	0.315	-0.296	0.162
245.41	-65.063	-66.406	-66.406	-66.528	-66.04	-65.552	-65.918	-49.927	-49.194	-46.753	245.41	0.162	0.315	0.162	0.086	0.62	0.849	0.544	0.467	-0.067	0.238
245.61	-65.063	-66.406	-66.406	-66.528	-66.04	-65.552	-65.918	-49.927	-49.194	-46.875	245.61	0.162	0.315	0.238	0.238	0.544	1.078	0.162	0.62	0.391	0.391
245.81	-64.941	-66.406	-66.284	-66.528	-66.04	-65.552	-65.918	-49.927	-49.316	-46.997	245.81	0.162	-0.067	0.467	0.467	0.62	1.23	-0.219	0.467	0.62	0.315
246.01	-65.063	-66.406	-66.406	-66.406	-66.04	-65.552	-65.796	-50.049	-49.316	-47.119	246.01	0.162	-0.219	0.62	0.696	0.467	1.001	-0.067	0.315	0.544	-0.067
246.21	-64.941	-66.406	-66.406	-66.406	-66.04	-65.674	-65.918	-50.171	-49.438	-47.241	246.21	0.238	0.238	0.467	0.772	0.315	0.62	0.467	0.467	0.62	-0.372
246.41	-65.063	-66.406	-66.406	-66.406	-65.918	-65.674	-65.918	-50.171	-49.561	-47.363	246.41	0.467	0.849	0.315	0.696	0.467	0.544	0.925	0.62	0.925	-0.372
246.61	-65.063	-66.284	-66.406	-66.406	-65.918	-65.674	-65.918	-50.293	-49.561	-47.363	246.61	0.62	0.925	0.467	0.467	0.62	0.62	0.925	0.467	0.925	-0.143
246.81	-65.063	-66.284	-66.284	-66.528	-65.918	-65.674	-65.918	-50.415	-49.683	-47.485	246.81	0.467	0.544	0.62	0.238	0.467	0.467	0.544	0.238	0.62	0.086
247.01	-65.063	-66.406	-66.284	-66.528	-65.918	-65.552	-65.918	-50.537	-49.683	-47.607	247.01	0.238	0.238	0.467	0.238	0.315	0.315	0.238	0.162	0.544	0.162
247.21	-65.063	-66.406	-66.406	-66.528	-65.918	-65.552	-65.918	-50.537	-49.805	-47.729	247.21	0.162	0.238	0.238	0.467	0.467	0.467	0.162	0.162	0.62	0.162
247.41	-65.063	-66.406	-66.406	-66.528	-66.04	-65.674	-65.918	-50.537	-49.927	-47.729	247.41	0.162	0.467	0.238	0.62	0.62	0.544	0.162	0.162	0.467	0.238
247.61	-65.063	-66.406	-66.284	-66.528	-65.918	-65.674	-65.918	-50.659	-50.049	-47.852	247.61	0.162	0.62	0.467	0.467	0.467	0.162	0.238	0.238	0.315	0.467
247.81	-65.063	-66.406	-66.406	-66.528	-65.918	-65.674	-65.918	-50.781	-50.171	-47.852	247.81	0.238	0.544	0.62	0.238	0.238	-0.219	0.467	0.544	0.544	0.62
248.01	-65.063	-66.284	-66.406	-66.528	-66.04	-65.674	-66.04	-50.781	-50.171	-47.974	248.01	0.467	0.544	0.467	0.086	0.162	-0.067	0.62	0.925	0.925	0.467
248.21	-64.941	-66.284	-66.284	-66.528	-66.04	-65.674	-66.04	-50.903	-50.293	-47.974	248.21	0.62	0.62	0.238	-0.219	0.162	0.391	0.467	0.925	0.849	0.238
248.41	-65.063	-66.406	-66.406	-66.528	-66.04	-65.674	-65.918	-51.025	-50.415	-48.096	248.41	0.467	0.467	0.238	-0.601	0.162	0.62	0.238	0.467	0.315	0.086
248.61	-65.063	-66.284	-66.406	-66.528	-65.918	-65.674	-65.918	-51.025	-50.537	-48.218	248.61	0.162	0.238	0.467	-0.525	0.162	0.467	0.162	0.01	0.086	-0.143
248.81	-65.063	-66.284	-66.406	-66.528	-66.04	-65.674	-65.918	-51.147	-50.537	-48.34	248.81	-0.143	0.086	0.62	0.086	0.238	0.238	0.162	0.086	0.315	-0.219
249.01	-65.063	-66.406	-66.406	-66.528	-66.04	-65.674	-65.918	-51.147	-50.659	-48.462	249.01	-0.296	-0.143	0.467	0.62	0.467	0.162	0.162	0.62	0.315	0.162
249.21	-64.941	-66.406	-66.284	-66.528	-66.04	-65.552	-65.918	-51.27	-50.659	-48.462	249.21	-0.143	-0.296	0.238	0.772	0.62	0.086	0.162	0.849	-0.067	0.467
249.41	-64.941	-66.406	-66.406	-66.528	-66.04	-65.674	-65.796	-51.27	-50.781	-48.584	249.41	0.086	-0.143	0.162	0.696	0.467	-0.143	0.238	0.544	-0.296	0.162
249.61	-65.063	-66.528	-66.406	-66.528	-66.04	-65.552	-65.918	-51.392	-51.025	-48.706	249.61	0.162	0.086	0.162	0.467	0.238	-0.296	0.467	0.238	-0.143	-0.219
249.81	-65.063	-66.406	-66.406	-66.528	-66.04	-65.674	-65.918	-51.514	-51.025	-48.706	249.81	0.162	0.238	0.162	0.238	0.162	-0.067	0.544	0.162	0.01	-0.143
250.01	-65.063	-66.528	-66.406	-66.528	-66.04	-65.674	-65.796	-51.514	-51.025	-48.828	250.01	0.162	0.467	0.238	0.162	0.238	0.315	0.162	0.162	-0.143	0.086
250.21	-64.941	-66.528	-66.406	-66.528	-66.04	-65.674	-65.796	-51.636	-51.147	-48.95	250.21	0.162	0.696	0.544	0.238	0.467	0.315	-0.143	0.086	-0.296	0.162
250.41	-64.941	-66.528	-66.406	-66.528	-66.04	-65.674	-65.918	-51.758	-51.147	-49.072	250.41	0.162	0.849	0.925	0.467	0.62	0.01	0.238	-0.143	-0.143	0.162
250.61	-64.941	-66.406	-66.406	-66.528	-66.04	-65.674	-65.918	-51.758	-51.27	-49.072	250.61	0.238	1.001	0.925	0.62	0.467	0.01	0.849	-0.296	0.086	0.162
250.81	-64.941	-66.528	-66.528	-66.528	-66.04	-65.674	-65.918	-51.88	-51.27	-49.194	250.81	0.467	0.925	0.62	0.467	0.238	0.391	0.925	-0.143	0.162	0.162
251.01	-64.941	-66.406	-66.528	-66.528	-66.04	-65.796	-65.918	-51.88	-51.392	-49.316	251.01	0.62	0.544	0.544	0.315	0.162	0.62	0.544	0.086	0.162	0.162
251.21	-64.941	-66.528	-66.406	-66.528	-66.04	-65.674	-65.918	-52.002	-51.514	-49.438	251.21	0.467	0.238	0.62	0.544	0.162	0.467	0.238	0.162	0.162	0.086
251.41	-64.941	-66.528	-66.406	-66.528	-66.04	-65.674	-65.918	-52.002	-51.636	-49.561	251.41	0.238	0.162	0.544	0.925	0.162	0.238	0.162	0.162	0.086	-0.219
251.61	-65.063	-66.406	-66.406	-66.406	-66.04	-65.674	-65.918	-52.124	-51.636	-49.561	251.61	0.162	0.162	0.544	0.925	0.162	0.162	0.162	0.162	-0.219	-0.601
251.81	-64.941	-66.528	-66.406	-66.406	-65.918	-65.674	-65.918	-52.246	-51.636	-49.561	251.81	0.162	0.238	0.696	0.62	0.162	0.238	0.162	0.162	-0.601	-0.601
252.01	-64.941	-66.528	-66.406	-66.406	-66.04	-65.674	-66.04	-52.368	-51.758	-49.805	252.01	0.086	0.544	0.772	0.544	0.162	0.467	0.238	0.086	-0.601	-0.219
252.21	-64.819	-66.406	-66.406	-66.528	-66.04	-65.796	-65.918	-52.246	-51.88	-49.927	252.21	-0.143	0.925	0.696	0.62	0.162	0.62	0.467	-0.067	-0.219	0.086
252.41	-64.941	-66.528	-66.406	-66.406	-66.04	-65.674	-66.04	-52.368	-52.002	-49.927	252.41	-0.296	1.001	0.467	0.467	0.162	0.467	0.62	0.01	0.086	0.086
252.61	-64.819	-66.528	-66.406	-66.528	-66.04	-65.674	-66.04	-52.49	-51.88	-50.049	252.61	-0.143	0.849	0.238	0.238	0.162	0.238	0.467	0.238	0.086	-0.143
252.81	-64.941	-66.528	-66.406	-66.528	-66.04	-65.796	-66.04	-52.49	-52.002	-50.171	252.81	0.086	0.696	0.162	0.238	0.162	0.162	0.238	0.086	-0.143	-0.296
253.01	-64.941	-66.406	-66.406	-66.406	-66.04	-65.674	-66.04	-52.612	-52.124	-50.293	253.01	0.162	0.467	0.162	0.467	0.162	0.162	0.238	-0.219	-0.296	-0.143
253.21	-64.941	-66.528	-66.406	-66.406	-66.04	-65.674	-66.04	-52.734	-52.246	-50.171	253.21	0.162	0.162	0.162	0.62	0.162	0.162	0.467	-0.143	-0.219	0.01
253.41	-64.941	-66.528	-66.406	-66.528	-66.04	-65.674	-66.04	-52.734	-52.246	-50.293	253.41	0.162	-0.219	0.162	0.467	0.162	0.162	0.62	0.01	-0.296	-0.143
253.61	-64.941	-66.406	-66.406	-66.528	-66.04	-65.796	-66.04	-52.856	-52.368	-50.415	253.61	0.162	-0.601	0.162	0.238	0.162	0.162	0.467	-0.219	-0.601	-0.372
253.81	-64.941	-66.406	-66.284	-66.528	-66.04	-65.796	-66.04	-52.979	-52.49	-50.537	253.81	0.086	-0.601	0.162	0.162	0.162	0.086	0.238	-0.601	-0.601	-0.525
254.01	-64.819	-66.406	-66.406	-66.528	-66.162	-65.674	-66.04	-52.979	-52.612	-50.659	254.01	-0.143	-0.219	0.086	0.162	0.162	-0.143	0.162	-0.601	-0.219	-0.677
254.21	-64.941	-66.406	-66.284	-66.65	-66.162	-65.674	-66.04	-53.101	-52.612	-50.659	254.21	-0.219	0.01	-0.219	0.162	0.162	-0.296	0.162	-0.296	0.01	-0.601
254.41	-64.941	-66.406	-66.406	-66.528	-66.162	-65.796	-66.04	-53.101	-52.734	-50.781	254.41	0.162	-0.143	-0.601	0.086	0.086	-0.143	0.086	-0.219	-0.143	-0.219
254.61	-64.941	-66.528	-66.406	-66.528	-66.162	-65.674	-66.04	-53.223	-52.856	-50.781	254.61	0.544	-0.296	-0.601	-0.143	-0.143	0.086	-0.219	-0.372	-0.296	0.01
254.81	-64.941	-66.528	-66.406	-66.528	-66.162	-65.674	-66.04	-53.223	-52.979	-50.903	254.81	0.467	-0.219	-0.296	-0.296	-0.296	0.162	-0.601	-0.448	-0.143	-0.143
255.01	-64.941	-66.528	-66.406	-66.528	-66.162	-65.674	-65.918	-53.345	-53.101	-50.903	255.01	0.238	-0.219	-0.296	-0.219	-0.143	0.162	-0.601	-0.372	0.086	-0.296
255.21	-64.941	-66.528	-66.406	-66.65	-66.162	-65.796	-65.918	-53.467	-53.101	-51.025	255.21	0.162	-0.296	-0.601	-0.296	0.01	0.162	-0.296	-0.143	0.086	-0.219
255.41	-64.819	-66.528	-66.406	-66.528	-66.162	-65.796	-65.918	-53.467	-53.223	-51.147	255.41	0.162	-0.143	-0.601	-0.601	-0.219	0.162	-0.219	0.086	-0.143	-0.296
255.61	-64.941	-66.528	-66.406	-66.65	-66.162	-65.796	-65.918	-53.589	-53.223	-51.27	255.61	0.162	0.086	-0.296	-0.601	-0.601	0.086	-0.296	0.162	-0.296	-0.677
255.81	-64.819	-66.528	-66.406	-66.65	-66.162	-65.796	-66.04	-53.589	-53.223	-51.27	255.81	0.162	0.162	-0.219	-0.296	-0.677	-0.219	-0.143	0.162	-0.219	-0.906
256.01	-64.819	-66.406	-66.528	-66.65	-66.162	-65.674	-66.04	-53.589	-53.345	-51.392	256.01	0.086	0.086	-0.296	-0.219	-0.525	-0.601	0.01	0.086	-0.296	-0.677
256.21	-64.819	-66.528	-66.528	-66.65	-66.04	-65.674	-66.04	-53.711	-53.467	-51.392	256.21	-0.143	-0.219	-0.219	-0.296	-0.372	-0.525	-0.143	-0.143	-0.601	-0.219
256.41	-64.819	-66.528	-66.528	-66.65	-66.04	-65.674	-66.04	-53.833	-53.589	-51.514	256.41	-0.296	-0.677	-0.296	-0.143	-0.143	0.086	-0.296	-0.372	-0.601	0.01
256.61	-64.819	-66.528	-66.528	-66.65	-66.04	-65.674	-66.04	-53.833	-53.589	-51.514	256.61	-0.143	-0.982	-0.601	0.086	0.01	0.544	-0.219	-0.448	-0.296	-0.219
256.81	-64.819	-66.528	-66.528	-66.65	-66.162	-65.674	-66.04	-53.955	-53.589	-51.636	256.81	0.086	-1.059	-0.677	0.162	-0.143	0.467	-0.219	-0.372	-0.219	-0.601
257.01	-64.819	-66.528	-66.528	-66.65	-66.162	-65.796	-66.04	-53.955	-53.711	-51.758	257.01	0.162	-0.982	-0.525	0.162	-0.296	0.238	-0.296	-0.219	-0.372	-0.601
257.21	-64.697	-66.528	-66.528	-66.65	-66.162	-65.674	-66.04	-53.955	-53.833	-51.758	257.21	0.162	-0.677	-0.372	0.162	-0.143	0.086	-0.143	-0.296	-0.448	-0.296
257.41	-64.697	-66.528	-66.406	-66.65	-66.162	-65.674	-66.04	-54.077	-53.833	-51.88	257.41	0.086	-0.219	-0.219	0.162	0.086	-0.143	0.086	-0.601	-0.372	-0.296
257.61	-64.697	-66.528	-66.406	-66.65	-66.162	-65.674	-66.04	-54.077	-53.833	-52.002	257.61	-0.143	0.01	-0.219	0.162	0.162	-0.372	0.086	-0.601	-0.219	-0.601
257.81	-64.819	-66.528	-66.528	-66.65	-66.162	-65.674	-66.04	-54.199	-53.833	-52.124	257.81	-0.296	-0.143	-0.296	0.086	0.162	-0.448	-0.143	-0.372	-0.296	-0.601
258.01	-64.697	-66.528	-66.528	-66.528	-66.162	-65.674	-66.04	-54.199	-53.955	-52.246	258.01	-0.219	-0.372	-0.143	-0.143	0.162	-0.448	-0.296	-0.601	-0.601	-0.219
258.21	-64.697	-66.528	-66.528	-66.528	-66.04	-65.674	-66.04	-54.321	-54.077	-52.246	258.21	-0.219	-0.448	0.086	-0.296	0.162	-0.448	-0.143	-1.059	-0.525	-0.067
258.41	-64.697	-66.528	-66.528	-66.65	-66.162	-65.674	-66.04	-54.321	-54.077	-52.246	258.41	-0.219	-0.372	0.162	-0.219	0.162	-0.372	0.086	-0.906	0.01	-0.525
258.61	-64.819	-66.528	-66.406	-66.528	-66.162	-65.796	-66.04	-54.443	-54.199	-52.368	258.61	0.162	-0.143	0.162	-0.219	0.162	-0.143	0.162	-0.296	0.238	-1.059
258.81	-64.697	-66.528	-66.406	-66.528	-66.04	-65.674	-66.04	-54.443	-54.199	-52.49	258.81	0.467	0.086	0.162	-0.372	0.086	0.01	0.162	0.01	-0.067	-0.982
259.01	-64.697	-66.528	-66.528	-66.65	-66.162	-65.674	-66.04	-54.565	-54.321	-52.612	259.01	0.086	0.162	0.162	-0.448	-0.143	-0.143	0.086	-0.143	-0.372	-0.677
259.21	-64.697	-66.528	-66.528	-66.65	-66.162	-65.796	-66.04	-54.565	-54.443	-52.734	259.21	-0.601	0.162	0.086	-0.372	-0.296	-0.296	-0.143	-0.296	-0.372	-0.677
259.41	-64.697	-66.528	-66.528	-66.528	-66.162	-65.674	-66.04	-54.688	-54.443	-52.734	259.41	-0.906	0.162	-0.143	-0.219	-0.143	-0.219	-0.296	-0.219	-0.219	-0.601
259.61	-64.697	-66.528	-66.406	-66.528	-66.162	-65.674	-66.04	-54.688	-54.565	-52.856	259.61	-0.677	0.162	-0.296	-0.219	0.086	-0.219	-0.143	-0.219	-0.219	-0.296
259.81	-64.697	-66.528	-66.406	-66.65	-66.162	-65.796	-66.04	-54.81	-54.565	-52.856	259.81	-0.219	0.162	-0.143	-0.296	0.086	-0.296	0.086	-0.219	-0.372	-0.219
260.01	-64.697	-66.528	-66.406	-66.65	-66.162	-65.796	-66.04	-54.81	-54.688	-52.979	260.01	0.01	0.162	0.01	-0.143	-0.143	-0.143	0.162	0.162	-0.448	-0.372
260.21	-64.697	-66.528	-66.406	-66.65	-66.162	-65.796	-66.04	-54.932	-54.688	-52.979	260.21	-0.143	0.086	-0.219	0.086	-0.296	0.086	0.162	0.467	-0.448	-0.448
260.41	-64.819	-66.528	-66.406	-66.65	-66.162	-65.796	-66.04	-54.932	-54.81	-52.979	260.41	-0.296	-0.143	-0.601	0.162	-0.143	0.162	0.162	0.086	-0.448	-0.372
260.61	-64.819	-66.528	-66.406	-66.65	-66.162	-65.796	-66.04	-55.054	-54.932	-53.101	260.61	-0.219	-0.296	-0.601	0.162	0.086	0.162	0.162	-0.601	-0.372	-0.143
260.81	-64.819	-66.528	-66.406	-66.65	-66.162	-65.796	-66.04	-55.176	-55.054	-53.223	260.81	-0.219	-0.143	-0.219	0.162	0.086	0.086	0.162	-0.906	-0.143	0.086
261.01	-64.819	-66.528	-66.406	-66.528	-66.04	-65.796	-66.04	-55.176	-55.054	-53.223	261.01	-0.296	0.086	0.086	0.162	-0.143	-0.219	0.162	-0.677	0.01	0.162
261.21	-64.819	-66.528	-66.406	-66.65	-66.162	-65.796	-66.04	-55.298	-55.054	-53.345	261.21	-0.143	0.162	0.162	0.162	-0.296	-0.601	0.086	-0.219	-0.143	0.162
261.41	-64.697	-66.528	-66.528	-66.65	-66.162	-65.796	-66.04	-55.176	-55.054	-53.467	261.41	0.086	0.162	0.162	0.162	-0.143	-0.601	-0.143	0.086	-0.296	0.162
261.61	-64.819	-66.528	-66.406	-66.65	-66.162	-65.796	-66.04	-55.298	-55.176	-53.467	261.61	0.162	0.162	0.162	0.162	0.01	-0.219	-0.219	0.162	-0.067	0.162
261.81	-64.819	-66.528	-66.406	-66.65	-66.162	-65.796	-66.04	-55.42	-55.298	-53.467	261.81	0.162	0.162	0.162	0.162	-0.143	0.01	0.162	0.162	0.391	0.162
262.01	-64.819	-66.528	-66.406	-66.65	-66.162	-65.796	-66.04	-55.42	-55.42	-53.589	262.01	0.086	0.086	0.162	0.162	-0.296	-0.143	0.544	0.162	0.62	0.238
262.21	-64.819	-66.528	-66.406	-66.65	-66.162	-65.796	-66.04	-55.542	-55.298	-53.711	262.21	-0.143	-0.219	0.162	0.162	-0.143	-0.296	0.467	0.162	0.467	0.544
262.41	-64.697	-66.528	-66.528	-66.528	-66.162	-65.796	-66.04	-55.542	-55.42	-53.833	262.41	-0.372	-0.525	0.162	0.162	0.086	-0.067	0.238	0.162	0.238	0.925
262.611	-64.819	-66.528	-66.406	-66.528	-66.162	-65.674	-66.04	-55.664	-55.542	-53.833	262.611	-0.448	-0.296	0.162	0.162	0.162	0.467	0.162	0.162	0.162	0.925
262.811	-64.819	-66.528	-66.528	-66.65	-66.162	-65.674	-66.04	-55.664	-55.664	-53.955	262.811	-0.372	0.162	0.162	0.162	0.238	0.925	0.162	0.162	0.162	0.467
263.011	-64.697	-66.528	-66.528	-66.528	-66.284	-65.796	-66.04	-55.664	-55.664	-53.955	263.011	-0.143	0.086	0.162	0.162	0.467	0.925	0.238	0.162	0.162	-0.067
263.211	-64.697	-66.528	-66.406	-66.528	-66.284	-65.796	-66.04	-55.786	-55.786	-54.077	263.211	0.086	-0.143	0.162	0.162	0.62	0.544	0.467	0.162	0.238	-0.296
263.411	-64.697	-66.406	-66.406	-66.528	-66.162	-65.674	-66.04	-55.908	-55.786	-54.077	263.411	0.162	0.162	0.238	0.162	0.467	0.238	0.696	0.162	0.544	-0.143
263.611	-64.697	-66.528	-66.406	-66.528	-66.162	-65.674	-66.04	-55.908	-55.908	-54.199	263.611	0.162	0.544	0.467	0.162	0.238	0.162	0.772	0.238	1.001	0.162
263.811	-64.697	-66.528	-66.406	-66.528	-66.162	-65.674	-66.04	-55.908	-55.908	-54.199	263.811	0.162	0.467	0.62	0.162	0.162	0.162	0.696	0.467	1.23	0.467
264.011	-64.697	-66.528	-66.406	-66.528	-66.162	-65.674	-66.04	-56.03	-56.03	-54.199	264.011	0.162	0.238	0.467	0.162	0.162	0.238	0.467	0.62	1.001	0.696
264.211	-64.697	-66.528	-66.528	-66.528	-66.162	-65.674	-66.04	-56.03	-56.03	-54.321	264.211	0.086	0.162	0.238	0.238	0.162	0.391	0.238	0.467	0.62	0.849
264.411	-64.697	-66.528	-66.528	-66.528	-66.162	-65.674	-65.918	-56.152	-56.03	-54.443	264.411	-0.143	0.162	0.162	0.467	0.162	0.315	0.162	0.238	0.62	1.001
264.611	-64.697	-66.528	-66.528	-66.406	-66.162	-65.674	-66.04	-56.152	-56.152	-54.565	264.611	-0.296	0.162	0.238	0.62	0.162	0.01	0.162	0.238	0.925	0.925
264.811	-64.697	-66.528	-66.528	-66.528	-66.162	-65.674	-66.04	-56.274	-56.152	-54.565	264.811	-0.143	0.162	0.467	0.467	0.238	0.01	0.162	0.467	1.001	0.544
265.011	-64.697	-66.528	-66.406	-66.528	-66.162	-65.674	-66.04	-56.274	-56.274	-54.565	265.011	0.086	0.162	0.62	0.238	0.544	0.391	0.162	0.62	0.925	0.238
265.211	-64.697	-66.528	-66.406	-66.528	-66.162	-65.552	-66.04	-56.274	-56.274	-54.688	265.211	0.162	0.162	0.467	0.162	0.925	0.62	0.162	0.467	1.001	0.162
265.411	-64.697	-66.528	-66.406	-66.528	-66.162	-65.674	-66.04	-56.396	-56.274	-54.81	265.411	0.162	0.162	0.238	0.162	1.001	0.467	0.238	0.315	0.925	0.162
265.611	-64.697	-66.528	-66.406	-66.528	-66.162	-65.674	-66.04	-56.519	-56.396	-54.932	265.611	0.162	0.162	0.162	0.162	0.849	0.315	0.467	0.467	0.62	0.162
265.811	-64.697	-66.528	-66.406	-66.528	-66.162	-65.674	-66.04	-56.519	-56.519	-54.932	265.811	0.238	0.162	0.162	0.162	0.772	0.467	0.62	0.62	0.62	0.162
266.011	-64.697	-66.528	-66.406	-66.528	-66.162	-65.674	-66.04	-56.641	-56.519	-54.932	266.011	0.467	0.238	0.238	0.162	0.772	0.544	0.467	0.391	0.925	0.162
266.211	-64.697	-66.528	-66.284	-66.528	-66.162	-65.674	-66.04	-56.641	-56.641	-55.054	266.211	0.62	0.467	0.467	0.162	0.696	0.162	0.315	-0.067	0.925	0.086
266.411	-64.697	-66.528	-66.284	-66.528	-66.284	-65.796	-66.04	-56.641	-56.641	-55.054	266.411	0.544	0.696	0.62	0.162	0.544	-0.143	0.467	-0.296	0.544	-0.143
266.611	-64.697	-66.528	-66.406	-66.528	-66.162	-65.796	-65.918	-56.763	-56.641	-55.176	266.611	0.544	0.849	0.544	0.162	0.62	0.162	0.544	-0.143	0.238	-0.296
266.811	-64.697	-66.528	-66.406	-66.528	-66.162	-65.796	-66.04	-56.763	-56.763	-55.298	266.811	0.62	1.001	0.544	0.162	0.925	0.544	0.162	0.086	0.162	-0.143
267.011	-64.697	-66.65	-66.284	-66.528	-66.162	-65.796	-66.04	-56.885	-56.885	-55.298	267.011	0.391	0.925	0.62	0.238	0.925	0.467	-0.296	0.238	0.238	0.162
267.211	-64.697	-66.65	-66.406	-66.528	-66.162	-65.796	-66.04	-56.885	-56.885	-55.42	267.211	-0.067	0.544	0.467	0.467	0.544	0.238	-0.448	0.467	0.467	0.544
267.411	-64.697	-66.65	-66.406	-66.65	-66.162	-65.796	-66.04	-56.885	-57.007	-55.42	267.411	-0.219	0.238	0.315	0.62	0.238	0.162	-0.372	0.62	0.696	0.925
267.611	-64.819	-66.528	-66.406	-66.65	-66.162	-65.674	-66.04	-56.885	-57.129	-55.542	267.611	0.162	0.238	0.467	0.467	0.086	0.162	-0.143	0.467	0.772	0.925
267.811	-64.819	-66.65	-66.406	-66.528	-66.162	-65.796	-66.04	-57.007	-57.129	-55.542	267.811	0.62	0.544	0.62	0.315	-0.143	0.162	0.086	0.238	0.696	0.467
268.011	-64.697	-66.65	-66.406	-66.528	-66.162	-65.796	-66.04	-57.007	-57.251	-55.664	268.011	0.772	0.849	0.467	0.467	-0.296	0.162	0.238	0.162	0.467	-0.067
268.211	-64.819	-66.65	-66.406	-66.65	-66.162	-65.796	-66.04	-57.007	-57.251	-55.664	268.211	0.696	0.62	0.162	0.62	-0.143	0.238	0.467	0.162	0.238	-0.296
268.411	-64.819	-66.65	-66.406	-66.65	-66.162	-65.796	-65.918	-57.129	-57.251	-55.664	268.411	0.467	0.162	-0.143	0.544	0.086	0.467	0.62	0.162	0.162	-0.143
268.611	-64.697	-66.528	-66.406	-66.528	-66.284	-65.796	-66.04	-57.251	-57.251	-55.786	268.611	0.238	0.315	-0.296	0.62	0.162	0.62	0.467	0.162	0.162	0.086
268.811	-64.697	-66.65	-66.406	-66.65	-66.284	-65.796	-66.04	-57.251	-57.373	-55.786	268.811	0.162	0.849	-0.143	1.001	0.162	0.467	0.238	0.238	0.162	0.162
269.011	-64.697	-66.528	-66.406	-66.528	-66.162	-65.796	-65.918	-57.373	-57.373	-55.908	269.011	0.162	0.925	0.086	1.23	0.238	0.238	0.162	0.467	0.238	0.162
269.211	-64.697	-66.528	-66.406	-66.528	-66.284	-65.796	-66.04	-57.373	-57.495	-56.03	269.211	0.162	0.544	0.162	1.001	0.467	0.162	0.162	0.62	0.391	0.238
269.411	-64.819	-66.65	-66.406	-66.528	-66.284	-65.674	-66.04	-57.373	-57.373	-56.03	269.411	0.162	0.238	0.238	0.62	0.62	0.162	0.238	0.467	0.391	0.467
269.611	-64.819	-66.528	-66.528	-66.528	-66.162	-65.674	-66.04	-57.373	-57.495	-56.152	269.611	0.162	0.162	0.467	0.544	0.467	0.238	0.467	0.238	0.315	0.62
269.811	-64.697	-66.528	-66.406	-66.528	-66.284	-65.674	-66.04	-57.495	-57.617	-56.152	269.811	0.162	0.162	0.696	0.62	0.238	0.544	0.696	0.238	0.391	0.467
270.011	-64.819	-66.65	-66.406	-66.528	-66.284	-65.674	-66.04	-57.495	-57.739	-56.274	270.011	0.162	0.162	0.772	0.467	0.238	0.925	0.772	0.467	0.391	0.238
270.211	-64.819	-66.65	-66.406	-66.528	-66.284	-65.674	-66.04	-57.617	-57.739	-56.274	270.211	0.162	0.162	0.696	0.162	0.467	0.925	0.696	0.544	0.238	0.162
270.411	-64.697	-66.65	-66.406	-66.528	-66.284	-65.674	-66.162	-57.617	-57.739	-56.396	270.411	0.086	0.162	0.467	-0.143	0.544	0.544	0.467	0.162	0.238	0.162
270.611	-64.697	-66.528	-66.406	-66.528	-66.284	-65.674	-66.04	-57.739	-57.861	-56.396	270.611	-0.067	0.162	0.238	-0.296	0.162	0.315	0.238	-0.143	0.544	0.162
270.811	-64.697	-66.528	-66.406	-66.528	-66.284	-65.796	-66.04	-57.861	-57.861	-56.519	270.811	0.01	0.162	0.162	-0.143	-0.219	0.544	0.162	0.162	0.925	0.162
271.011	-64.697	-66.65	-66.406	-66.528	-66.284	-65.674	-66.04	-57.861	-57.983	-56.519	271.011	0.315	0.162	0.162	0.086	-0.143	0.925	0.162	0.544	0.925	0.086
271.211	-64.697	-66.65	-66.406	-66.406	-66.284	-65.674	-66.04	-57.861	-57.983	-56.519	271.211	0.391	0.162	0.162	0.162	0.086	0.925	0.238	0.467	0.544	-0.219
271.411	-64.697	-66.65	-66.406	-66.528	-66.284	-65.796	-66.04	-57.861	-58.105	-56.641	271.411	0.238	0.162	0.162	0.162	0.238	0.544	0.467	0.238	0.238	-0.601
271.611	-64.697	-66.65	-66.406	-66.406	-66.284	-65.796	-66.04	-57.983	-58.105	-56.763	271.611	0.162	0.162	0.162	0.162	0.544	0.315	0.544	0.162	0.238	-0.601
271.811	-64.819	-66.528	-66.528	-66.528	-66.162	-65.796	-66.04	-57.983	-58.228	-56.763	271.811	0.162	0.162	0.162	0.162	0.849	0.544	0.162	0.162	0.467	-0.219
272.011	-64.697	-66.65	-66.406	-66.528	-66.162	-65.796	-66.04	-58.105	-58.228	-56.885	272.011	0.162	0.162	0.238	0.162	0.62	0.925	-0.143	0.162	0.62	0.086
272.211	-64.697	-66.65	-66.406	-66.528	-66.162	-65.796	-66.04	-58.105	-58.35	-57.007	272.211	0.162	0.162	0.467	0.238	0.086	0.849	0.238	0.162	0.467	0.086
272.411	-64.697	-66.528	-66.406	-66.406	-66.284	-65.918	-66.04	-58.228	-58.35	-57.007	272.411	0.238	0.162	0.62	0.467	-0.067	0.238	0.772	0.162	0.238	-0.219
272.611	-64.697	-66.65	-66.406	-66.406	-66.284	-65.796	-66.04	-58.228	-58.472	-57.007	272.611	0.467	0.162	0.467	0.62	0.086	-0.219	0.62	0.162	0.162	-0.601
272.811	-64.697	-66.65	-66.406	-66.528	-66.162	-65.918	-66.04	-58.228	-58.472	-57.007	272.811	0.696	0.162	0.315	0.467	0.162	-0.143	0.086	0.162	0.086	-0.601
273.011	-64.697	-66.65	-66.406	-66.528	-66.284	-65.796	-66.04	-58.228	-58.594	-57.251	273.011	0.772	0.162	0.467	0.238	0.162	0.086	-0.067	0.162	-0.143	-0.143
273.211	-64.697	-66.65	-66.406	-66.528	-66.284	-65.918	-66.04	-58.35	-58.594	-57.129	273.211	0.696	0.086	0.62	0.162	0.162	0.162	0.086	0.162	-0.296	0.238
273.411	-64.697	-66.65	-66.406	-66.528	-66.284	-65.796	-66.04	-58.35	-58.716	-57.129	273.411	0.467	-0.219	0.467	0.162	0.162	0.238	0.162	0.162	-0.143	0.01
273.611	-64.697	-66.65	-66.406	-66.528	-66.162	-65.918	-66.162	-58.35	-58.716	-57.251	273.611	0.238	-0.677	0.315	0.086	0.162	0.467	0.162	0.162	0.086	-0.448
273.811	-64.819	-66.65	-66.406	-66.528	-66.162	-65.918	-66.04	-58.472	-58.716	-57.373	273.811	0.162	-0.906	0.467	-0.219	0.162	0.544	0.086	0.086	0.162	-0.448
274.011	-64.697	-66.65	-66.406	-66.528	-66.284	-65.918	-66.04	-58.472	-58.838	-57.495	274.011	0.086	-0.677	0.62	-0.601	0.162	0.162	-0.143	-0.143	0.162	-0.296
274.211	-64.697	-66.65	-66.406	-66.528	-66.284	-65.796	-66.04	-58.594	-58.838	-57.495	274.211	-0.143	-0.219	0.467	-0.601	0.162	-0.219	-0.296	-0.296	0.162	-0.296
274.411	-64.819	-66.65	-66.406	-66.528	-66.284	-65.918	-66.04	-58.594	-58.838	-57.495	274.411	-0.296	0.086	0.238	-0.219	0.162	-0.143	-0.143	-0.219	0.086	-0.143
274.611	-64.697	-66.65	-66.406	-66.528	-66.284	-65.796	-66.04	-58.716	-58.96	-57.495	274.611	-0.219	0.162	0.238	0.01	0.086	0.086	0.01	-0.219	-0.219	0.086
274.811	-64.819	-66.65	-66.528	-66.528	-66.284	-65.796	-66.04	-58.716	-58.96	-57.495	274.811	-0.219	0.086	0.467	-0.219	-0.143	0.086	-0.143	-0.372	-0.601	0.162
275.011	-64.819	-66.65	-66.406	-66.528	-66.284	-65.918	-66.04	-58.838	-58.96	-57.739	275.011	-0.296	-0.219	0.62	-0.601	-0.296	-0.219	-0.296	-0.448	-0.601	0.086
275.211	-64.819	-66.65	-66.528	-66.528	-66.284	-65.918	-66.04	-58.838	-58.96	-57.739	275.211	-0.143	-0.601	0.467	-0.677	-0.143	-0.601	-0.143	-0.372	-0.296	-0.143
275.411	-64.819	-66.65	-66.406	-66.528	-66.284	-65.918	-66.04	-58.838	-58.96	-57.739	275.411	0.086	-0.677	0.315	-0.525	0.01	-0.677	0.086	-0.143	-0.296	-0.372
275.611	-64.697	-66.65	-66.406	-66.406	-66.284	-65.918	-66.04	-58.96	-58.96	-57.861	275.611	0.086	-0.525	0.391	-0.372	-0.219	-0.601	0.162	0.086	-0.601	-0.525
275.811	-64.697	-66.65	-66.406	-66.528	-66.406	-65.918	-66.04	-58.96	-59.082	-57.861	275.811	-0.219	-0.372	0.315	-0.143	-0.601	-0.677	0.162	0.162	-0.601	-0.677
276.011	-64.819	-66.65	-66.406	-66.528	-66.406	-65.918	-66.04	-58.96	-59.204	-57.983	276.011	-0.601	-0.219	-0.067	0.01	-0.601	-0.525	0.162	0.162	-0.296	-0.601
276.211	-64.697	-66.772	-66.406	-66.528	-66.284	-65.918	-66.04	-58.96	-59.204	-57.983	276.211	-0.677	-0.296	-0.448	-0.143	-0.296	0.086	0.086	0.086	-0.296	-0.219
276.411	-64.697	-66.65	-66.406	-66.528	-66.406	-65.918	-66.162	-59.082	-59.204	-58.105	276.411	-0.601	-0.601	-0.677	-0.372	-0.219	0.544	-0.143	-0.219	-0.601	0.086
276.611	-64.697	-66.65	-66.406	-66.406	-66.406	-65.918	-66.04	-59.082	-59.326	-58.105	276.611	-0.753	-0.677	-0.601	-0.448	-0.372	0.467	-0.372	-0.601	-0.525	0.086
276.811	-64.819	-66.772	-66.406	-66.406	-66.406	-65.918	-66.162	-59.204	-59.326	-58.105	276.811	-0.906	-0.525	-0.219	-0.372	-0.448	0.238	-0.448	-0.601	0.01	-0.219
277.011	-64.697	-66.65	-66.528	-66.406	-66.406	-65.918	-66.162	-59.204	-59.326	-58.228	277.011	-0.677	-0.372	0.086	-0.219	-0.372	0.162	-0.448	-0.219	0.238	-0.601
277.211	-64.697	-66.65	-66.406	-66.406	-66.406	-65.796	-66.04	-59.326	-59.448	-58.228	277.211	-0.219	-0.219	0.162	-0.219	-0.143	0.086	-0.448	0.01	0.01	-0.601
277.411	-64.819	-66.772	-66.406	-66.528	-66.406	-65.918	-66.162	-59.326	-59.448	-58.35	277.411	0.01	-0.219	0.086	-0.296	0.086	-0.067	-0.296	-0.143	-0.067	-0.219
277.611	-64.697	-66.65	-66.406	-66.528	-66.406	-65.918	-66.162	-59.326	-59.57	-58.35	277.611	-0.219	-0.372	-0.219	-0.143	0.086	-0.067	0.162	-0.296	0.086	0.086
277.811	-64.697	-66.772	-66.528	-66.406	-66.284	-65.796	-66.04	-59.448	-59.57	-58.472	277.811	-0.601	-0.448	-0.601	0.086	-0.219	0.01	0.544	-0.219	0.086	0.086
278.011	-64.697	-66.772	-66.406	-66.406	-66.284	-65.918	-66.04	-59.326	-59.57	-58.472	278.011	-0.601	-0.448	-0.601	0.162	-0.601	-0.143	0.467	-0.219	-0.143	-0.143
278.211	-64.697	-66.772	-66.406	-66.406	-66.284	-65.918	-66.04	-59.448	-59.692	-58.472	278.211	-0.296	-0.448	-0.219	0.162	-0.601	-0.372	0.162	-0.372	-0.219	-0.296
278.411	-64.697	-66.772	-66.406	-66.528	-66.284	-65.918	-66.04	-59.57	-59.814	-58.594	278.411	-0.219	-0.372	0.086	0.086	-0.296	-0.372	-0.143	-0.448	0.162	-0.143
278.611	-64.697	-66.772	-66.406	-66.406	-66.284	-65.918	-66.04	-59.448	-59.814	-58.594	278.611	-0.296	-0.143	0.162	-0.143	-0.219	-0.143	-0.372	-0.372	0.544	0.086
278.811	-64.697	-66.772	-66.406	-66.406	-66.284	-65.918	-66.04	-59.57	-59.814	-58.716	278.811	-0.219	0.086	0.086	-0.296	-0.296	0.01	-0.525	-0.219	0.391	0.162
279.011	-64.697	-66.65	-66.406	-66.406	-66.284	-65.918	-66.162	-59.57	-59.814	-58.838	279.011	-0.219	0.238	-0.143	-0.219	-0.143	-0.143	-0.677	-0.296	-0.143	0.086
279.211	-64.697	-66.772	-66.406	-66.406	-66.284	-65.918	-66.04	-59.57	-59.937	-58.716	279.211	-0.372	0.467	-0.372	-0.219	0.086	-0.296	-0.677	-0.601	-0.601	-0.219
279.411	-64.697	-66.65	-66.406	-66.406	-66.284	-65.918	-66.162	-59.57	-59.937	-58.838	279.411	-0.525	0.544	-0.448	-0.296	0.162	-0.143	-0.601	-0.601	-0.601	-0.677
279.611	-64.697	-66.65	-66.406	-66.406	-66.284	-65.918	-66.162	-59.692	-60.059	-58.838	279.611	-0.677	0.086	-0.372	-0.219	0.162	0.086	-0.753	-0.219	-0.219	-0.906
279.811	-64.697	-66.65	-66.406	-66.406	-66.284	-65.918	-66.04	-59.692	-60.059	-59.082	279.811	-0.601	-0.525	-0.143	-0.219	0.162	0.086	-0.906	0.086	0.01	-0.677
280.011	-64.697	-66.65	-66.406	-66.528	-66.284	-66.04	-66.04	-59.814	-60.059	-58.96	280.011	-0.219	-0.601	0.086	-0.296	0.086	-0.143	-0.601	0.086	-0.143	-0.219
280.211	-64.697	-66.65	-66.406	-66.406	-66.406	-65.918	-66.04	-59.814	-60.181	-59.082	280.211	0.01	-0.143	0.086	-0.143	-0.143	-0.296	0.01	-0.143	-0.296	0.01
280.411	-64.697	-66.65	-66.406	-66.406	-66.284	-65.918	-66.04	-59.937	-60.181	-58.96	280.411	-0.143	0.315	-0.219	0.086	-0.296	-0.143	0.238	-0.296	-0.143	-0.143
280.611	-64.697	-66.772	-66.406	-66.406	-66.284	-65.918	-66.04	-59.937	-60.181	-59.082	280.611	-0.296	0.315	-0.601	0.086	-0.143	0.086	-0.067	-0.143	0.086	-0.219
280.811	-64.697	-66.772	-66.284	-66.406	-66.284	-65.918	-66.04	-59.937	-60.303	-59.082	280.811	-0.143	0.01	-0.601	-0.143	0.086	0.086	-0.372	0.086	0.086	0.162
281.011	-64.697	-66.65	-66.284	-66.406	-66.406	-65.918	-66.162	-59.937	-60.181	-59.204	281.011	0.086	-0.067	-0.296	-0.296	0.162	-0.143	-0.372	0.162	-0.143	0.544
281.211	-64.819	-66.65	-66.406	-66.528	-66.406	-65.918	-66.162	-60.059	-60.181	-59.204	281.211	0.162	0.086	-0.219	-0.143	0.162	-0.296	-0.143	0.162	-0.296	0.467
281.411	-64.819	-66.772	-66.406	-66.528	-66.406	-65.918	-66.04	-60.059	-60.181	-59.326	281.411	0.086	0.162	-0.296	0.01	0.162	-0.219	0.086	0.162	-0.143	0.238
281.611	-64.697	-66.65	-66.406	-66.406	-66.406	-65.918	-66.04	-60.181	-60.303	-59.326	281.611	-0.143	0.086	-0.143	-0.219	0.162	-0.219	0.162	0.086	0.086	0.086
281.811	-64.819	-66.65	-66.406	-66.406	-66.406	-65.918	-66.04	-60.181	-60.303	-59.326	281.811	-0.296	-0.143	0.01	-0.677	0.086	-0.296	0.162	-0.143	0.238	-0.143
282.011	-64.819	-66.772	-66.406	-66.406	-66.406	-65.918	-66.04	-60.059	-60.303	-59.326	282.011	-0.143	-0.372	-0.143	-0.906	-0.143	-0.143	0.162	-0.296	0.544	-0.296
282.211	-64.819	-66.772	-66.406	-66.406	-66.284	-65.918	-66.04	-59.937	-60.303	-59.448	282.211	0.086	-0.525	-0.296	-0.677	-0.219	0.086	0.162	-0.143	0.925	-0.143
282.411	-64.819	-66.65	-66.406	-66.528	-66.284	-65.918	-66.04	-59.692	-60.425	-59.448	282.411	0.086	-0.753	-0.143	-0.219	0.162	0.162	0.162	0.086	0.925	0.086
282.611	-64.819	-66.772	-66.406	-66.406	-66.284	-65.918	-66.04	-59.57	-60.425	-59.57	282.611	-0.219	-0.906	0.086	0.086	0.544	0.162	0.238	0.162	0.544	0.238
282.811	-64.819	-66.772	-66.406	-66.406	-66.406	-65.918	-66.04	-59.204	-60.425	-59.57	282.811	-0.601	-0.677	0.162	0.162	0.467	0.162	0.467	0.238	0.315	0.467
283.011	-64.819	-66.772	-66.406	-66.406	-66.406	-65.918	-66.04	-58.838	-60.547	-59.57	283.011	-0.525	-0.219	0.162	0.162	0.238	0.162	0.62	0.544	0.467	0.62
283.211	-64.697	-66.772	-66.406	-66.406	-66.406	-65.918	-66.04	-58.472	-60.547	-59.692	283.211	0.162	0.086	0.238	0.162	0.162	0.162	0.467	0.925	0.544	0.544
283.411	-64.697	-66.772	-66.406	-66.406	-66.284	-65.796	-66.04	-58.105	-60.669	-59.692	283.411	0.849	0.238	0.467	0.162	0.162	0.162	0.238	0.925	0.162	0.544
283.611	-64.697	-66.772	-66.406	-66.406	-66.284	-65.918	-66.04	-57.617	-60.669	-59.814	283.611	0.925	0.467	0.62	0.162	0.162	0.162	0.162	0.544	-0.219	0.696
283.811	-64.697	-66.772	-66.406	-66.406	-66.284	-65.918	-66.04	-57.129	-60.791	-59.692	283.811	0.544	0.544	0.467	0.162	0.162	0.162	0.162	0.315	-0.143	0.849
284.011	-64.697	-66.772	-66.406	-66.406	-66.284	-65.918	-66.04	-56.641	-60.669	-59.814	284.011	0.238	0.162	0.238	0.162	0.162	0.162	0.086	0.467	0.086	1.078
284.211	-64.697	-66.772	-66.406	-66.406	-66.284	-65.918	-66.04	-56.152	-60.791	-59.814	284.211	0.086	-0.143	0.238	0.162	0.162	0.162	-0.067	0.544	0.162	1.307
284.411	-64.819	-66.772	-66.528	-66.406	-66.284	-65.918	-66.04	-55.542	-60.913	-59.937	284.411	-0.143	0.162	0.467	0.238	0.162	0.162	0.01	0.162	0.315	1.307
284.611	-64.697	-66.772	-66.406	-66.406	-66.284	-65.918	-66.162	-54.932	-60.913	-59.937	284.611	-0.296	0.544	0.62	0.544	0.086	0.162	0.391	-0.219	0.849	1.001
284.811	-64.819	-66.65	-66.528	-66.406	-66.284	-65.918	-66.04	-54.321	-60.913	-59.937	284.811	-0.067	0.467	0.467	0.849	-0.143	0.238	0.772	-0.067	1.383	0.544
285.011	-64.697	-66.772	-66.528	-66.406	-66.284	-65.918	-66.04	-53.833	-60.913	-60.059	285.011	0.467	0.238	0.315	0.62	-0.219	0.467	1.001	0.391	1.23	0.238
285.211	-64.697	-66.772	-66.406	-66.406	-66.284	-65.918	-66.04	-53.223	-61.035	-60.059	285.211	0.925	0.238	0.544	0.086	0.162	0.62	1.001	0.62	0.62	0.162
285.411	-64.697	-66.772	-66.406	-66.406	-66.284	-65.918	-66.04	-52.612	-61.035	-60.059	285.411	0.925	0.544	0.925	-0.067	0.544	0.467	0.849	0.467	0.238	0.162
285.611	-64.697	-66.65	-66.406	-66.406	-66.284	-65.918	-66.162	-52.124	-60.913	-60.181	285.611	0.544	0.925	0.925	0.162	0.467	0.315	0.696	0.315	0.162	0.162
285.811	-64.697	-66.65	-66.406	-66.406	-66.284	-65.918	-66.04	-51.514	-60.669	-60.181	285.811	0.238	0.925	0.62	0.467	0.315	0.544	0.467	0.467	0.162	0.162
286.011	-64.697	-66.65	-66.406	-66.406	-66.284	-65.918	-66.04	-50.903	-60.425	-60.181	286.011	0.238	0.62	0.62	0.62	0.544	0.925	0.238	0.62	0.162	0.162
286.211	-64.697	-66.65	-66.406	-66.406	-66.406	-66.04	-66.04	-50.293	-60.059	-60.303	286.211	0.391	0.544	0.925	0.467	0.925	0.925	0.162	0.467	0.238	0.162
286.411	-64.697	-66.65	-66.284	-66.406	-66.284	-65.918	-66.04	-49.683	-59.814	-60.303	286.411	0.391	0.696	0.925	0.238	0.925	0.62	0.162	0.315	0.467	0.162
286.611	-64.697	-66.65	-66.284	-66.406	-66.284	-65.918	-66.04	-49.072	-59.326	-60.303	286.611	0.315	0.772	0.544	0.238	0.62	0.62	0.162	0.391	0.62	0.162
286.811	-64.697	-66.528	-66.406	-66.406	-66.284	-65.918	-66.162	-48.462	-58.838	-60.425	286.811	0.391	0.696	0.315	0.467	0.544	0.925	0.238	0.315	0.467	0.238
287.011	-64.697	-66.65	-66.406	-66.406	-66.284	-65.918	-66.04	-47.852	-58.35	-60.425	287.011	0.391	0.467	0.467	0.62	0.62	0.925	0.467	0.01	0.238	0.467
287.211	-64.697	-66.65	-66.406	-66.406	-66.284	-65.918	-66.04	-47.363	-57.983	-60.425	287.211	0.315	0.315	0.62	0.467	0.467	0.544	0.62	-0.067	0.162	0.62
287.411	-64.697	-66.65	-66.406	-66.406	-66.406	-65.918	-66.04	-46.753	-57.373	-60.547	287.411	0.544	0.467	0.467	0.315	0.238	0.238	0.467	0.01	0.162	0.467
287.612	-64.819	-66.65	-66.284	-66.528	-66.284	-65.918	-66.162	-46.143	-56.885	-60.547	287.612	0.925	0.62	0.238	0.467	0.162	0.162	0.238	-0.143	0.238	0.238
287.812	-64.819	-66.65	-66.406	-66.528	-66.284	-65.918	-66.162	-45.41	-56.274	-60.547	287.812	0.925	0.544	0.162	0.544	0.162	0.238	0.162	-0.296	0.467	0.162
288.012	-64.697	-66.65	-66.406	-66.528	-66.406	-65.918	-66.04	-44.922	-55.786	-60.547	288.012	0.544	0.544	0.162	0.162	0.162	0.467	0.162	-0.143	0.62	0.162
288.212	-64.697	-66.65	-66.284	-66.406	-66.406	-65.918	-66.04	-44.312	-55.176	-60.669	288.212	0.315	0.62	0.162	-0.219	0.162	0.62	0.162	0.086	0.467	0.162
288.412	-64.697	-66.65	-66.284	-66.406	-66.406	-65.796	-66.04	-43.701	-54.565	-60.669	288.412	0.544	0.467	0.162	-0.143	0.162	0.544	0.162	0.086	0.238	0.162
288.612	-64.819	-66.772	-66.284	-66.406	-66.406	-65.918	-66.04	-43.091	-54.077	-60.791	288.612	0.925	0.238	0.162	0.086	0.162	0.62	0.162	-0.143	0.162	0.162
288.812	-64.819	-66.65	-66.406	-66.406	-66.406	-65.918	-66.04	-42.358	-53.467	-60.791	288.812	0.925	0.162	0.162	0.162	0.162	0.925	0.162	-0.296	0.162	0.162
289.012	-64.697	-66.772	-66.406	-66.406	-66.284	-65.918	-66.04	-41.748	-52.856	-60.791	289.012	0.544	0.162	0.162	0.238	0.162	0.925	0.162	-0.067	0.238	0.162
289.212	-64.697	-66.772	-66.406	-66.406	-66.406	-65.918	-66.04	-41.016	-52.246	-60.913	289.212	0.238	0.162	0.162	0.467	0.238	0.544	0.238	0.391	0.467	0.238
289.412	-64.697	-66.772	-66.406	-66.406	-66.406	-65.918	-66.04	-40.405	-51.636	-60.913	289.412	0.162	0.162	0.162	0.62	0.544	0.238	0.391	0.62	0.62	0.467
289.612	-64.697	-66.772	-66.406	-66.406	-66.406	-65.918	-66.04	-39.673	-51.147	-60.913	289.612	0.162	0.238	0.162	0.467	0.925	0.238	0.315	0.391	0.467	0.62
289.812	-64.819	-66.772	-66.406	-66.406	-66.406	-65.918	-66.04	-38.94	-50.537	-61.035	289.812	0.162	0.467	0.162	0.238	0.849	0.391	0.086	-0.067	0.238	0.467
290.012	-64.819	-66.65	-66.406	-66.406	-66.406	-65.918	-66.04	-38.208	-49.805	-61.035	290.012	0.162	0.696	0.162	0.162	0.238	0.391	0.238	-0.296	0.162	0.238
290.212	-64.697	-66.65	-66.406	-66.406	-66.406	-66.04	-66.04	-37.231	-49.316	-61.035	290.212	0.162	0.849	0.238	0.162	-0.219	0.315	0.62	-0.143	0.162	0.238
290.412	-64.697	-66.65	-66.406	-66.406	-66.406	-65.918	-66.04	-36.377	-48.706	-61.035	290.412	0.162	1.078	0.544	0.162	-0.143	0.391	0.849	0.086	0.162	0.544
290.612	-64.697	-66.772	-66.528	-66.406	-66.406	-65.918	-66.162	-35.4	-48.096	-61.157	290.612	0.162	1.307	0.925	0.238	0.086	0.391	1.001	0.162	0.162	0.925
290.812	-64.697	-66.772	-66.406	-66.406	-66.528	-66.04	-66.162	-34.18	-47.485	-61.035	290.812	0.162	1.307	0.925	0.544	0.162	0.238	0.925	0.238	0.238	0.849
291.012	-64.697	-66.772	-66.406	-66.406	-66.406	-66.04	-66.04	-32.715	-46.997	-61.035	291.012	0.162	0.925	0.544	0.925	0.238	0.238	0.544	0.467	0.467	0.238
291.212	-64.697	-66.65	-66.406	-66.406	-66.284	-65.918	-66.162	-31.128	-46.265	-60.791	291.212	0.162	0.238	0.238	0.925	0.544	0.544	0.238	0.544	0.62	-0.219
291.412	-64.819	-66.772	-66.528	-66.406	-66.406	-65.918	-66.162	-29.053	-45.776	-60.669	291.412	0.238	-0.219	0.162	0.544	0.925	0.925	0.162	0.162	0.467	-0.143
291.612	-64.697	-66.65	-66.528	-66.406	-66.406	-65.918	-66.162	-26.123	-45.166	-60.303	291.612	0.544	-0.143	0.162	0.315	0.925	0.925	0.238	-0.219	0.162	0.01
291.812	-64.697	-66.772	-66.528	-66.406	-66.406	-66.04	-66.04	-21.973	-44.556	-59.937	291.812	0.925	0.01	0.162	0.544	0.544	0.544	0.467	-0.143	-0.219	-0.143
292.012	-64.697	-66.772	-66.406	-66.406	-66.406	-65.918	-66.162	-15.381	-43.945	-59.57	292.012	0.849	-0.143	0.162	0.849	0.238	0.238	0.544	0.01	-0.677	-0.296
292.212	-64.697	-66.772	-66.406	-66.406	-66.406	-66.04	-66.162	-6.104	-43.213	-59.204	292.212	0.238	-0.219	0.162	0.62	0.162	0.162	0.162	-0.219	-0.906	-0.219
292.412	-64.697	-66.772	-66.406	-66.406	-66.406	-66.04	-66.162	3.54	-42.725	-58.594	292.412	-0.219	0.238	0.162	0.086	0.086	0.162	-0.219	-0.601	-0.677	-0.296
292.612	-64.697	-66.772	-66.406	-66.406	-66.406	-66.04	-66.162	10.132	-42.114	-58.105	292.612	-0.067	0.849	0.162	-0.067	-0.219	0.162	-0.143	-0.677	-0.219	-0.677
292.812	-64.697	-66.772	-66.406	-66.406	-66.284	-66.04	-66.162	13.306	-41.382	-57.617	292.812	0.391	0.925	0.162	0.01	-0.525	0.162	0.01	-0.601	0.086	-0.906
293.012	-64.697	-66.772	-66.406	-66.406	-66.406	-66.04	-66.162	14.893	-40.771	-57.129	293.012	0.62	0.544	0.162	-0.143	-0.296	0.162	-0.219	-0.753	0.086	-0.677
293.212	-64.697	-66.772	-66.406	-66.406	-66.406	-66.04	-66.162	15.625	-40.039	-56.519	293.212	0.467	0.315	0.162	-0.296	0.238	0.086	-0.525	-0.982	-0.219	-0.219
293.412	-64.697	-66.772	-66.406	-66.406	-66.406	-65.918	-66.162	15.991	-39.307	-55.908	293.412	0.238	0.467	0.162	-0.143	0.391	-0.143	-0.296	-0.982	-0.601	0.01
293.612	-64.697	-66.772	-66.406	-66.406	-66.406	-65.918	-66.162	16.113	-38.574	-55.42	293.612	0.162	0.62	0.162	0.086	0.238	-0.219	0.162	-0.677	-0.677	-0.143
293.812	-64.697	-66.65	-66.284	-66.406	-66.406	-65.918	-66.162	16.235	-37.842	-54.81	293.812	0.162	0.467	0.162	0.162	0.162	0.162	0.086	-0.296	-0.525	-0.372
294.012	-64.697	-66.65	-66.406	-66.406	-66.406	-65.918	-66.162	16.235	-36.987	-54.199	294.012	0.086	0.238	0.162	0.086	0.086	0.544	-0.219	-0.296	-0.448	-0.525
294.212	-64.697	-66.772	-66.406	-66.406	-66.406	-65.918	-66.162	16.235	-36.011	-53.589	294.212	-0.143	0.086	0.162	-0.219	-0.143	0.467	-0.143	-0.677	-0.448	-0.677
294.412	-64.819	-66.772	-66.406	-66.406	-66.406	-66.04	-66.162	16.235	-35.034	-53.101	294.412	-0.296	-0.219	0.162	-0.601	-0.296	0.238	0.01	-0.982	-0.372	-0.601
294.612	-64.819	-66.772	-66.406	-66.406	-66.406	-66.04	-66.162	16.113	-33.813	-52.368	294.612	-0.143	-0.677	0.238	-0.601	-0.143	0.162	-0.219	-1.059	-0.219	-0.219
294.812	-64.819	-66.772	-66.406	-66.406	-66.406	-66.04	-66.162	16.113	-32.471	-51.758	294.812	0.086	-0.906	0.467	-0.296	0.086	0.086	-0.677	-0.982	-0.219	0.086
295.012	-64.697	-66.772	-66.406	-66.406	-66.406	-66.04	-66.162	15.991	-30.884	-51.147	295.012	0.162	-0.677	0.62	-0.219	0.086	-0.219	-0.906	-0.753	-0.372	0.162
295.212	-64.819	-66.895	-66.284	-66.406	-66.406	-66.04	-66.04	15.869	-29.053	-50.659	295.212	0.162	-0.296	0.467	-0.219	-0.143	-0.677	-0.677	-0.525	-0.448	0.162
295.412	-64.697	-66.895	-66.406	-66.406	-66.406	-66.04	-66.162	15.747	-26.489	-50.049	295.412	0.162	-0.219	0.238	0.162	-0.372	-0.906	-0.296	-0.372	-0.448	0.162
295.612	-64.697	-66.772	-66.406	-66.406	-66.406	-66.04	-66.162	15.503	-22.949	-49.316	295.612	0.086	-0.296	0.086	0.467	-0.525	-0.753	-0.219	-0.219	-0.448	0.086
295.812	-64.697	-66.772	-66.406	-66.406	-66.406	-65.918	-66.04	15.381	-17.822	-48.706	295.812	-0.143	-0.219	-0.143	0.086	-0.753	-0.601	-0.296	-0.296	-0.448	-0.143
296.012	-64.819	-66.772	-66.406	-66.406	-66.406	-66.04	-66.04	15.259	-10.498	-48.096	296.012	-0.372	-0.296	-0.296	-0.525	-0.906	-0.677	-0.219	-0.677	-0.525	-0.296
296.212	-64.697	-66.895	-66.406	-66.406	-66.406	-66.04	-66.162	15.137	-1.831	-47.607	296.212	-0.525	-0.677	-0.143	-0.601	-0.753	-0.601	-0.296	-0.982	-0.753	-0.143
296.412	-64.819	-66.895	-66.406	-66.406	-66.406	-65.918	-66.162	14.893	5.127	-46.875	296.412	-0.677	-0.982	0.086	-0.219	-0.525	-0.219	-0.601	-1.135	-0.906	0.01
296.612	-64.697	-66.772	-66.406	-66.406	-66.406	-65.918	-66.162	14.771	9.277	-46.387	296.612	-0.601	-0.982	0.086	0.01	-0.448	0.01	-0.601	-1.364	-0.753	-0.219
296.812	-64.697	-66.895	-66.406	-66.284	-66.406	-65.918	-66.162	14.648	11.475	-45.776	296.812	-0.296	-0.677	-0.219	-0.143	-0.448	-0.219	-0.219	-1.516	-0.525	-0.601
297.012	-64.697	-66.772	-66.406	-66.284	-66.406	-66.04	-66.162	14.404	12.451	-45.044	297.012	-0.219	-0.296	-0.601	-0.296	-0.448	-0.601	0.086	-1.287	-0.372	-0.677
297.212	-64.697	-66.772	-66.406	-66.284	-66.406	-66.04	-66.162	14.282	13.062	-44.434	297.212	-0.296	-0.219	-0.601	-0.143	-0.448	-0.601	0.162	-0.753	-0.219	-0.525
297.412	-64.697	-66.772	-66.406	-66.406	-66.406	-66.04	-66.162	14.16	13.306	-43.823	297.412	-0.219	-0.296	-0.219	0.01	-0.448	-0.219	0.162	-0.296	-0.296	-0.448
297.612	-64.697	-66.772	-66.406	-66.406	-66.284	-65.918	-66.162	14.038	13.55	-43.213	297.612	-0.219	-0.219	0.086	-0.143	-0.448	0.086	0.162	-0.296	-0.677	-0.525
297.812	-64.697	-66.772	-66.406	-66.406	-66.284	-66.04	-66.162	13.794	13.672	-42.725	297.812	-0.372	-0.296	0.162	-0.296	-0.372	0.086	0.162	-0.677	-0.906	-0.753
298.012	-64.697	-66.772	-66.528	-66.406	-66.406	-66.04	-66.162	13.672	13.794	-41.992	298.012	-0.448	-0.601	0.162	-0.143	-0.143	-0.143	0.086	-0.982	-0.753	-0.906
298.212	-64.697	-66.772	-66.406	-66.284	-66.284	-66.04	-66.162	13.55	13.794	-41.382	298.212	-0.448	-0.601	0.162	0.01	0.086	-0.296	-0.143	-1.059	-0.525	-0.677
298.412	-64.697	-66.772	-66.406	-66.284	-66.284	-66.04	-66.162	13.428	13.916	-40.649	298.412	-0.448	-0.219	0.086	-0.219	0.162	-0.219	-0.296	-1.059	-0.448	-0.219
298.612	-64.697	-66.772	-66.528	-66.406	-66.406	-66.04	-66.162	13.184	13.916	-39.917	298.612	-0.372	0.086	-0.143	-0.601	0.162	-0.296	-0.143	-0.982	-0.448	0.01
298.812	-64.697	-66.65	-66.406	-66.284	-66.406	-66.04	-66.162	12.939	14.038	-39.185	298.812	-0.143	0.086	-0.296	-0.601	0.086	-0.601	0.086	-0.677	-0.372	-0.143
299.012	-64.697	-66.65	-66.406	-66.284	-66.406	-66.04	-66.162	12.817	14.038	-38.452	299.012	0.086	-0.219	-0.143	-0.219	-0.143	-0.601	0.086	-0.296	-0.296	-0.296
299.212	-64.697	-66.65	-66.406	-66.284	-66.284	-66.04	-66.162	12.695	14.038	-37.72	299.212	0.162	-0.601	0.01	0.01	-0.296	-0.219	-0.143	-0.296	-0.525	-0.143
299.412	-64.697	-66.772	-66.406	-66.406	-66.284	-66.04	-66.162	12.451	13.916	-36.865	299.412	0.162	-0.601	-0.143	-0.219	-0.219	0.086	-0.296	-0.601	-0.83	0.01
299.612	-64.697	-66.772	-66.406	-66.406	-66.284	-66.04	-66.284	12.329	13.916	-35.889	299.612	0.162	-0.219	-0.296	-0.525	-0.219	0.162	-0.143	-0.601	-0.83	-0.219
299.812	-64.697	-66.65	-66.406	-66.284	-66.284	-66.04	-66.284	12.207	14.038	-35.034	299.812	0.162	0.086	-0.143	-0.372	-0.296	0.162	0.086	-0.296	-0.83	-0.601
300.012	-64.697	-66.772	-66.406	-66.284	-66.284	-66.04	-66.162	11.963	13.794	-33.936	300.012	0.162	0.162	0.086	-0.067	-0.219	0.162	0.162	-0.296	-0.982	-0.601
300.212	-64.697	-66.772	-66.406	-66.406	-66.406	-66.04	-66.284	11.719	13.794	-32.593	300.212	0.162	0.162	0.086	-0.143	-0.219	0.162	0.162	-0.677	-1.059	-0.296
300.412	-64.697	-66.772	-66.406	-66.406	-66.406	-66.04	-66.162	11.597	13.794	-31.25	300.412	0.162	0.162	-0.219	-0.372	-0.372	0.162	0.162	-0.982	-0.982	-0.219
300.612	-64.697	-66.772	-66.406	-66.284	-66.406	-65.918	-66.162	11.475	13.672	-29.663	300.612	0.162	0.086	-0.677	-0.296	-0.448	0.162	0.086	-1.059	-0.677	-0.296
300.812	-64.697	-66.772	-66.406	-66.406	-66.406	-66.04	-66.162	11.23	13.672	-27.466	300.812	0.086	-0.219	-0.906	0.162	-0.296	0.162	-0.143	-0.982	-0.296	-0.143
301.012	-64.697	-66.772	-66.406	-66.284	-66.406	-66.04	-66.162	10.986	13.55	-24.78	301.012	-0.143	-0.601	-0.677	0.467	0.162	0.162	-0.372	-0.753	-0.296	0.086
301.212	-64.697	-66.772	-66.406	-66.406	-66.406	-66.04	-66.162	10.864	13.428	-20.996	301.212	-0.296	-0.601	-0.219	0.162	0.544	0.086	-0.448	-0.525	-0.601	0.086
301.412	-64.697	-66.772	-66.406	-66.406	-66.406	-66.04	-66.162	10.62	13.306	-15.503	301.412	-0.219	-0.219	0.086	-0.219	0.467	-0.143	-0.372	-0.372	-0.601	-0.143
301.612	-64.697	-66.772	-66.284	-66.406	-66.406	-66.04	-66.162	10.376	13.306	-8.057	301.612	-0.219	0.01	0.162	-0.143	0.238	-0.296	-0.219	-0.143	-0.219	-0.296
301.812	-64.697	-66.65	-66.284	-66.406	-66.284	-66.04	-66.162	10.254	13.184	-0.244	301.812	-0.296	-0.219	0.162	0.086	0.162	-0.143	-0.296	0.086	0.086	-0.143
302.012	-64.697	-66.772	-66.284	-66.406	-66.406	-66.04	-66.284	10.01	13.184	5.737	302.012	-0.219	-0.677	0.162	0.162	0.162	0.086	-0.525	0.086	0.162	0.086
302.212	-64.697	-66.772	-66.284	-66.406	-66.406	-66.04	-66.284	9.766	13.062	9.033	302.212	-0.219	-0.982	0.086	0.162	0.162	0.162	-0.296	-0.143	0.162	0.086
302.412	-64.575	-66.772	-66.284	-66.284	-66.406	-65.918	-66.162	9.644	12.939	10.742	302.412	-0.296	-1.059	-0.143	0.162	0.238	0.162	0.238	-0.296	0.086	-0.143
302.612	-64.575	-66.772	-66.406	-66.406	-66.406	-65.918	-66.162	9.399	12.817	11.719	302.612	-0.143	-0.982	-0.296	0.162	0.467	0.162	0.391	-0.143	-0.219	-0.296
302.812	-64.575	-66.772	-66.284	-66.406	-66.406	-66.04	-66.162	9.277	12.695	12.207	302.812	0.086	-0.677	-0.219	0.162	0.62	0.162	0.238	0.086	-0.677	-0.143
303.012	-64.575	-66.772	-66.284	-66.406	-66.406	-65.918	-66.162	9.033	12.573	12.451	303.012	0.162	-0.219	-0.219	0.162	0.467	0.162	0.162	0.162	-0.906	0.086
303.212	-64.575	-66.772	-66.406	-66.284	-66.406	-65.918	-66.162	8.789	12.451	12.695	303.212	0.162	0.086	-0.296	0.162	0.238	0.238	0.162	0.162	-0.677	0.162
303.412	-64.575	-66.65	-66.284	-66.284	-66.406	-65.918	-66.162	8.545	12.207	12.817	303.412	0.162	0.162	-0.067	0.162	0.162	0.467	0.162	0.086	-0.219	0.162
303.612	-64.575	-66.65	-66.284	-66.284	-66.406	-66.04	-66.284	8.301	12.085	12.817	303.612	0.162	0.162	0.467	0.086	0.162	0.62	0.238	-0.219	0.086	0.162
303.812	-64.575	-66.65	-66.406	-66.284	-66.406	-66.04	-66.284	8.179	11.963	12.939	303.812	0.162	0.162	0.925	-0.143	0.162	0.467	0.467	-0.601	0.162	0.238
304.012	-64.575	-66.65	-66.284	-66.284	-66.406	-65.918	-66.284	8.057	11.841	12.939	304.012	0.162	0.162	0.925	-0.296	0.162	0.238	0.62	-0.601	0.162	0.467
304.212	-64.575	-66.772	-66.406	-66.284	-66.406	-66.04	-66.284	7.812	11.719	13.062	304.212	0.238	0.162	0.544	-0.067	0.238	0.238	0.467	-0.143	0.086	0.696
304.412	-64.575	-66.65	-66.284	-66.284	-66.406	-66.04	-66.284	7.568	11.719	13.062	304.412	0.467	0.238	0.238	0.391	0.544	0.544	0.238	0.391	-0.143	0.772
304.612	-64.575	-66.772	-66.406	-66.284	-66.406	-65.918	-66.284	7.324	11.475	13.184	304.612	0.62	0.467	0.162	0.696	0.925	0.925	0.162	0.62	-0.296	0.62
304.812	-64.575	-66.65	-66.406	-66.284	-66.406	-66.04	-66.284	7.08	11.353	13.184	304.812	0.467	0.62	0.162	0.849	0.925	0.925	0.162	0.467	-0.067	0.162
305.012	-64.575	-66.65	-66.406	-66.284	-66.406	-66.04	-66.162	6.836	11.23	13.184	305.012	0.238	0.467	0.162	1.001	0.544	0.62	0.162	0.238	0.391	-0.219
305.212	-64.575	-66.65	-66.406	-66.284	-66.406	-66.04	-66.162	6.592	10.986	13.062	305.212	0.162	0.238	0.238	0.925	0.315	0.544	0.238	0.162	0.62	-0.067
305.412	-64.575	-66.772	-66.406	-66.284	-66.284	-66.04	-66.284	6.348	10.864	13.184	305.412	0.162	0.162	0.544	0.544	0.467	0.62	0.467	0.162	0.467	0.315
305.612	-64.575	-66.772	-66.406	-66.284	-66.284	-66.04	-66.284	6.226	10.742	13.062	305.612	0.238	0.162	0.925	0.238	0.62	0.467	0.62	0.162	0.315	0.238
305.812	-64.575	-66.772	-66.406	-66.284	-66.406	-66.162	-66.162	5.981	10.62	13.062	305.812	0.467	0.162	0.925	0.162	0.467	0.315	0.467	0.238	0.467	-0.296
306.012	-64.575	-66.65	-66.406	-66.284	-66.284	-66.04	-66.162	5.737	10.376	12.939	306.012	0.696	0.162	0.544	0.238	0.315	0.467	0.238	0.467	0.544	-0.601
306.212	-64.575	-66.65	-66.406	-66.284	-66.284	-66.04	-66.162	5.493	10.254	12.939	306.212	0.772	0.238	0.238	0.467	0.391	0.62	0.162	0.544	0.162	-0.525
306.412	-64.575	-66.772	-66.406	-66.284	-66.284	-66.04	-66.162	5.249	10.132	12.817	306.412	0.696	0.467	0.238	0.696	0.315	0.467	0.162	0.162	-0.219	-0.448
306.612	-64.575	-66.65	-66.406	-66.284	-66.406	-66.04	-66.284	5.005	9.888	12.817	306.612	0.467	0.62	0.467	0.772	0.01	0.238	0.162	-0.219	-0.143	-0.525
306.812	-64.575	-66.65	-66.406	-66.284	-66.406	-66.04	-66.284	4.761	9.766	12.695	306.812	0.315	0.467	0.62	0.696	0.01	0.238	0.162	-0.143	0.01	-0.677
307.012	-64.575	-66.772	-66.406	-66.284	-66.284	-66.04	-66.284	4.395	9.644	12.695	307.012	0.467	0.315	0.467	0.467	0.391	0.467	0.086	0.086	-0.143	-0.525
307.212	-64.575	-66.772	-66.406	-66.406	-66.284	-66.04	-66.162	4.272	9.399	12.573	307.212	0.696	0.544	0.238	0.238	0.696	0.62	-0.143	0.162	-0.296	0.01
307.412	-64.575	-66.772	-66.406	-66.406	-66.406	-66.04	-66.284	4.028	9.277	12.451	307.412	0.772	1.001	0.162	0.162	0.696	0.467	-0.219	0.238	-0.067	0.162
307.612	-64.575	-66.65	-66.406	-66.406	-66.406	-66.162	-66.284	3.662	9.155	12.451	307.612	0.696	1.23	0.162	0.238	0.391	0.238	0.162	0.544	0.391	-0.372
307.812	-64.575	-66.65	-66.406	-66.406	-66.406	-66.04	-66.284	3.418	8.911	12.207	307.812	0.467	1.001	0.238	0.544	-0.067	0.162	0.544	0.925	0.544	-0.906
308.012	-64.575	-66.772	-66.284	-66.406	-66.284	-66.04	-66.284	3.174	8.789	12.207	308.012	0.238	0.544	0.467	0.925	-0.372	0.162	0.467	0.925	0.162	-0.982
308.212	-64.575	-66.772	-66.284	-66.406	-66.406	-66.04	-66.284	2.93	8.667	12.085	308.212	0.162	0.238	0.62	0.925	-0.372	0.086	0.315	0.544	-0.219	-0.677
308.412	-64.575	-66.65	-66.284	-66.406	-66.406	-66.162	-66.284	2.686	8.423	11.963	308.412	0.162	0.162	0.544	0.544	-0.143	-0.143	0.467	0.238	-0.143	-0.219
308.612	-64.575	-66.65	-66.406	-66.528	-66.406	-66.04	-66.284	2.441	8.301	11.841	308.612	0.162	0.086	0.544	0.315	0.162	-0.296	0.62	0.162	0.086	0.086
308.812	-64.697	-66.772	-66.284	-66.406	-66.406	-66.04	-66.162	2.075	8.179	11.719	308.812	0.162	-0.143	0.62	0.544	0.544	-0.143	0.467	0.162	0.162	0.086
309.012	-64.575	-66.772	-66.284	-66.406	-66.406	-66.04	-66.162	1.831	7.935	11.719	309.012	0.162	-0.219	0.467	0.925	1.001	0.086	0.238	0.162	0.238	-0.143
309.212	-64.575	-66.772	-66.284	-66.406	-66.406	-66.04	-66.162	1.587	7.69	11.597	309.212	0.162	0.162	0.238	0.925	1.23	0.086	0.238	0.162	0.391	-0.296
309.412	-64.575	-66.772	-66.284	-66.406	-66.406	-66.04	-66.162	1.343	7.568	11.475	309.412	0.162	0.544	0.162	0.544	1.001	-0.143	0.467	0.162	0.315	-0.143
309.612	-64.575	-66.772	-66.406	-66.406	-66.406	-66.04	-66.162	0.977	7.324	11.353	309.612	0.162	0.467	0.238	0.238	0.544	-0.296	0.544	0.086	-0.067	0.086
309.812	-64.575	-66.65	-66.406	-66.406	-66.406	-66.04	-66.162	0.732	7.08	11.23	309.812	0.162	0.315	0.544	0.238	0.238	-0.143	0.162	-0.219	-0.372	0.086
310.012	-64.575	-66.772	-66.284	-66.406	-66.406	-66.04	-66.284	0.488	6.836	11.108	310.012	0.162	0.467	0.925	0.467	0.162	0.086	-0.219	-0.601	-0.372	-0.219
310.212	-64.575	-66.772	-66.284	-66.406	-66.284	-66.04	-66.284	0.244	6.592	10.986	310.212	0.162	0.62	0.925	0.62	0.162	0.162	-0.067	-0.601	-0.143	-0.601
310.412	-64.575	-66.772	-66.284	-66.406	-66.406	-66.04	-66.284	-0.122	6.47	10.864	310.412	0.162	0.467	0.544	0.544	0.162	0.238	0.391	-0.219	0.086	-0.601
310.612	-64.575	-66.772	-66.284	-66.406	-66.406	-66.04	-66.284	-0.366	6.226	10.62	310.612	0.162	0.238	0.238	0.544	0.162	0.467	0.62	0.086	0.086	-0.219
310.812	-64.453	-66.772	-66.284	-66.406	-66.406	-66.04	-66.284	-0.61	6.104	10.62	310.812	0.162	0.238	0.162	0.62	0.162	0.62	0.467	0.162	-0.143	0.086
311.012	-64.575	-66.772	-66.284	-66.406	-66.284	-66.162	-66.284	-0.977	5.859	10.376	311.012	0.162	0.467	0.162	0.544	0.162	0.467	0.238	0.238	-0.372	0.162
311.212	-64.575	-66.772	-66.406	-66.406	-66.406	-66.162	-66.162	-1.221	5.615	10.254	311.212	0.162	0.62	0.162	0.62	0.238	0.238	0.162	0.467	-0.525	0.162
311.412	-64.575	-66.65	-66.284	-66.284	-66.406	-66.04	-66.284	-1.587	5.371	10.132	311.412	0.086	0.467	0.162	0.925	0.544	0.238	0.162	0.62	-0.753	0.086
311.612	-64.575	-66.772	-66.284	-66.284	-66.406	-66.162	-66.284	-1.831	5.127	10.01	311.612	-0.219	0.315	0.162	0.925	0.925	0.467	0.086	0.391	-0.906	-0.143
311.812	-64.575	-66.65	-66.284	-66.284	-66.284	-66.162	-66.284	-2.197	5.005	9.888	311.812	-0.601	0.467	0.162	0.544	0.925	0.62	-0.143	-0.143	-0.677	-0.372
312.012	-64.575	-66.772	-66.406	-66.284	-66.284	-66.162	-66.284	-2.563	4.761	9.766	312.012	-0.601	0.544	0.162	0.238	0.544	0.467	-0.296	-0.601	-0.296	-0.525
312.212	-64.575	-66.772	-66.284	-66.406	-66.284	-66.162	-66.284	-2.686	4.517	9.521	312.212	-0.143	0.086	0.162	0.162	0.238	0.238	-0.219	-0.601	-0.219	-0.677
312.412	-64.575	-66.772	-66.406	-66.284	-66.406	-66.162	-66.284	-3.052	4.272	9.399	312.412	0.391	-0.448	0.162	0.162	0.162	0.162	-0.219	-0.219	-0.296	-0.677
312.613	-64.453	-66.772	-66.284	-66.406	-66.284	-66.162	-66.284	-3.296	4.15	9.277	312.613	0.62	-0.219	0.162	0.162	0.162	0.162	-0.296	0.086	-0.219	-0.601
312.813	-64.575	-66.772	-66.284	-66.406	-66.284	-66.162	-66.284	-3.662	3.906	9.033	312.813	0.544	0.544	0.162	0.162	0.162	0.162	-0.143	0.086	-0.296	-0.753
313.013	-64.453	-66.772	-66.284	-66.406	-66.284	-66.162	-66.284	-3.906	3.662	8.911	313.013	0.544	0.849	0.162	0.162	0.238	0.162	0.086	-0.143	-0.677	-0.906
313.213	-64.453	-66.772	-66.406	-66.406	-66.284	-66.162	-66.284	-4.15	3.54	8.667	313.213	0.62	0.544	0.162	0.162	0.544	0.086	0.162	-0.296	-0.982	-0.677
313.413	-64.575	-66.772	-66.406	-66.406	-66.284	-66.162	-66.284	-4.395	3.296	8.545	313.413	0.391	0.238	0.162	0.086	0.925	-0.143	0.238	-0.219	-1.059	-0.372
313.613	-64.575	-66.772	-66.406	-66.406	-66.284	-66.162	-66.284	-4.761	3.052	8.423	313.613	-0.067	0.238	0.162	-0.143	0.925	-0.296	0.467	-0.219	-0.982	-0.601
313.813	-64.575	-66.772	-66.406	-66.406	-66.406	-66.162	-66.162	-5.127	2.808	8.301	313.813	-0.296	0.467	0.162	-0.296	0.544	-0.143	0.62	-0.296	-0.677	-1.135
314.013	-64.453	-66.772	-66.406	-66.406	-66.284	-66.162	-66.284	-5.371	2.686	8.057	314.013	-0.219	0.62	0.162	-0.143	0.238	0.086	0.467	-0.219	-0.296	-1.211
314.213	-64.575	-66.772	-66.406	-66.406	-66.406	-66.162	-66.284	-5.615	2.441	7.935	314.213	-0.296	0.467	0.162	0.086	0.086	0.162	0.162	-0.219	-0.296	-0.83
314.413	-64.453	-66.65	-66.406	-66.406	-66.284	-66.04	-66.162	-5.859	2.197	7.812	314.413	-0.601	0.238	0.086	0.086	-0.219	0.162	-0.143	-0.372	-0.677	-0.601
314.613	-64.575	-66.65	-66.284	-66.406	-66.284	-66.162	-66.284	-6.226	1.953	7.69	314.613	-0.601	0.162	-0.143	-0.143	-0.601	0.086	-0.372	-0.448	-0.982	-0.677
314.813	-64.575	-66.65	-66.406	-66.528	-66.406	-66.162	-66.162	-6.47	1.709	7.446	314.813	-0.219	0.086	-0.296	-0.296	-0.677	-0.143	-0.525	-0.448	-0.982	-0.677
315.013	-64.575	-66.65	-66.406	-66.528	-66.406	-66.04	-66.162	-6.714	1.465	7.324	315.013	0.01	-0.143	-0.219	-0.219	-0.601	-0.296	-0.753	-0.525	-0.753	-0.525
315.213	-64.575	-66.772	-66.284	-66.528	-66.406	-66.162	-66.162	-7.08	1.221	7.08	315.213	-0.143	-0.296	-0.219	-0.296	-0.753	-0.219	-0.906	-0.753	-0.601	-0.448
315.413	-64.575	-66.772	-66.284	-66.528	-66.406	-66.04	-66.162	-7.324	0.977	6.836	315.413	-0.296	-0.143	-0.296	-0.677	-0.906	-0.219	-0.677	-0.906	-0.677	-0.525
315.613	-64.575	-66.772	-66.284	-66.528	-66.406	-66.162	-66.162	-7.568	0.732	6.592	315.613	-0.219	0.01	-0.143	-0.906	-0.677	-0.296	-0.219	-0.677	-0.601	-0.753
315.813	-64.575	-66.772	-66.284	-66.528	-66.406	-66.162	-66.284	-7.812	0.366	6.47	315.813	-0.219	-0.143	0.086	-0.677	-0.219	-0.067	0.01	-0.296	-0.219	-0.982
316.013	-64.575	-66.65	-66.284	-66.528	-66.406	-66.04	-66.162	-8.179	0.122	6.226	316.013	-0.372	-0.296	0.162	-0.219	0.01	0.391	-0.143	-0.219	0.01	-1.059
316.213	-64.453	-66.65	-66.284	-66.528	-66.406	-66.162	-66.284	-8.423	-0.122	6.104	316.213	-0.525	-0.143	0.086	0.01	-0.143	0.544	-0.372	-0.372	-0.143	-1.059
316.413	-64.575	-66.65	-66.284	-66.528	-66.406	-66.04	-66.162	-8.789	-0.366	5.859	316.413	-0.677	0.086	-0.143	-0.143	-0.296	0.162	-0.525	-0.525	-0.296	-0.982
316.613	-64.575	-66.772	-66.406	-66.406	-66.284	-66.04	-66.162	-8.911	-0.61	5.737	316.613	-0.677	0.162	-0.296	-0.296	-0.143	-0.219	-0.753	-0.753	-0.219	-0.753
316.813	-64.575	-66.772	-66.284	-66.528	-66.406	-66.162	-66.162	-9.277	-0.854	5.615	316.813	-0.525	0.086	-0.219	-0.219	0.01	-0.219	-0.906	-0.906	-0.296	-0.601
317.013	-64.575	-66.772	-66.406	-66.528	-66.406	-66.162	-66.162	-9.521	-1.099	5.371	317.013	-0.372	-0.143	-0.296	-0.296	-0.219	-0.296	-0.677	-0.677	-0.601	-0.753
317.213	-64.575	-66.772	-66.284	-66.406	-66.406	-66.162	-66.162	-9.766	-1.221	5.127	317.213	-0.143	-0.296	-0.601	-0.601	-0.677	-0.601	-0.219	-0.219	-0.601	-0.906
317.413	-64.575	-66.772	-66.284	-66.406	-66.406	-66.162	-66.162	-10.132	-1.465	5.005	317.413	0.086	-0.219	-0.601	-0.601	-0.83	-0.677	0.01	0.01	-0.296	-0.677
317.613	-64.575	-66.772	-66.284	-66.528	-66.406	-66.162	-66.162	-10.254	-1.709	4.761	317.613	0.162	-0.219	-0.296	-0.219	-0.372	-0.525	-0.143	-0.219	-0.296	-0.296
317.813	-64.575	-66.772	-66.406	-66.528	-66.284	-66.162	-66.284	-10.62	-2.075	4.517	317.813	0.162	-0.296	-0.296	0.01	0.238	-0.448	-0.296	-0.677	-0.677	-0.296
318.013	-64.575	-66.772	-66.406	-66.406	-66.406	-66.162	-66.284	-10.864	-2.319	4.272	318.013	0.162	-0.143	-0.677	-0.219	0.391	-0.448	-0.143	-0.906	-0.906	-0.677
318.213	-64.575	-66.772	-66.406	-66.528	-66.284	-66.162	-66.162	-11.108	-2.441	4.15	318.213	0.162	0.086	-0.906	-0.601	0.162	-0.372	0.086	-0.677	-0.753	-0.906
318.413	-64.575	-66.772	-66.406	-66.406	-66.406	-66.162	-66.162	-11.353	-2.686	3.906	318.413	0.162	0.162	-0.677	-0.677	-0.143	-0.143	0.162	-0.219	-0.525	-0.677
318.613	-64.575	-66.772	-66.406	-66.406	-66.406	-66.162	-66.162	-11.597	-3.052	3.662	318.613	0.162	0.162	-0.219	-0.601	-0.372	0.01	0.086	0.086	-0.448	-0.219
318.813	-64.453	-66.65	-66.406	-66.406	-66.284	-66.162	-66.162	-11.841	-3.174	3.54	318.813	0.162	0.162	0.086	-0.753	-0.448	-0.143	-0.143	0.162	-0.525	0.086
319.013	-64.575	-66.772	-66.406	-66.528	-66.406	-66.162	-66.284	-12.085	-3.54	3.296	319.013	0.086	0.162	0.162	-0.982	-0.372	-0.296	-0.296	0.086	-0.753	0.162
319.213	-64.453	-66.772	-66.406	-66.406	-66.284	-66.162	-66.284	-12.329	-3.784	3.052	319.213	-0.219	0.162	0.086	-0.982	-0.143	-0.143	-0.219	-0.219	-0.982	0.162
319.413	-64.575	-66.772	-66.406	-66.406	-66.284	-66.162	-66.162	-12.573	-4.028	2.808	319.413	-0.677	0.162	-0.143	-0.753	0.086	0.086	-0.219	-0.677	-0.982	0.086
319.613	-64.575	-66.772	-66.406	-66.406	-66.284	-66.162	-66.162	-12.817	-4.15	2.563	319.613	-0.906	0.162	-0.296	-0.525	0.086	0.086	-0.219	-0.982	-0.677	-0.143
319.813	-64.575	-66.772	-66.406	-66.528	-66.284	-66.162	-66.284	-12.939	-4.395	2.441	319.813	-0.677	0.086	-0.143	-0.448	-0.143	-0.143	0.162	-0.982	-0.219	-0.296
320.013	-64.453	-66.772	-66.406	-66.406	-66.406	-66.162	-66.162	-13.184	-4.761	2.075	320.013	-0.219	-0.143	0.086	-0.448	-0.296	-0.219	0.544	-0.677	0.01	-0.219
320.213	-64.575	-66.772	-66.406	-66.528	-66.406	-66.162	-66.162	-13.428	-5.005	1.953	320.213	0.086	-0.372	0.162	-0.372	-0.219	0.162	0.391	-0.296	-0.219	-0.219
320.413	-64.453	-66.65	-66.406	-66.528	-66.406	-66.04	-66.284	-13.672	-5.249	1.709	320.413	0.162	-0.448	0.086	-0.219	-0.219	0.544	-0.067	-0.219	-0.601	-0.372
320.613	-64.575	-66.65	-66.284	-66.406	-66.406	-66.04	-66.162	-13.794	-5.493	1.587	320.613	0.162	-0.448	-0.219	-0.296	-0.296	0.391	-0.296	-0.372	-0.677	-0.448
320.813	-64.575	-66.65	-66.284	-66.528	-66.284	-66.04	-66.162	-14.16	-5.737	1.343	320.813	0.086	-0.525	-0.601	-0.525	-0.219	-0.067	-0.219	-0.448	-0.525	-0.372
321.013	-64.453	-66.65	-66.284	-66.528	-66.284	-66.04	-66.162	-14.282	-5.981	1.099	321.013	-0.143	-0.677	-0.601	-0.296	-0.219	-0.296	-0.219	-0.372	-0.448	-0.143
321.213	-64.575	-66.65	-66.406	-66.528	-66.406	-66.04	-66.162	-14.526	-6.226	0.854	321.213	-0.372	-0.601	-0.219	0.162	-0.296	-0.219	-0.296	-0.219	-0.525	0.086
321.413	-64.575	-66.65	-66.284	-66.528	-66.406	-66.04	-66.162	-14.648	-6.47	0.61	321.413	-0.448	-0.219	0.086	0.086	-0.143	-0.219	-0.143	-0.296	-0.677	0.162
321.613	-64.575	-66.772	-66.284	-66.528	-66.406	-66.162	-66.162	-14.893	-6.836	0.366	321.613	-0.372	0.086	0.162	-0.219	0.01	-0.296	0.086	-0.525	-0.525	0.162
321.813	-64.453	-66.65	-66.284	-66.528	-66.406	-66.162	-66.162	-15.137	-7.08	0.122	321.813	-0.143	0.162	0.162	-0.143	-0.143	-0.143	0.162	-0.296	0.086	0.238
322.013	-64.575	-66.65	-66.284	-66.528	-66.406	-66.04	-66.162	-15.259	-7.202	-0.122	322.013	0.01	0.162	0.162	0.086	-0.296	0.086	0.086	0.238	0.544	0.467
322.213	-64.575	-66.65	-66.284	-66.528	-66.406	-66.162	-66.162	-15.625	-7.446	-0.366	322.213	-0.143	0.162	0.162	0.162	-0.143	0.162	-0.143	0.391	0.467	0.62
322.413	-64.575	-66.65	-66.284	-66.528	-66.406	-66.162	-66.162	-15.747	-7.69	-0.488	322.413	-0.296	0.162	0.162	0.162	0.086	0.238	-0.296	0.238	0.238	0.467
322.613	-64.575	-66.772	-66.284	-66.406	-66.406	-66.162	-66.162	-15.991	-7.935	-0.854	322.613	-0.143	0.086	0.238	0.162	0.162	0.544	-0.143	0.162	0.162	0.238
322.813	-64.575	-66.65	-66.284	-66.528	-66.406	-66.162	-66.162	-16.113	-8.179	-0.977	322.813	0.086	-0.219	0.467	0.162	0.238	0.925	0.162	0.162	0.162	0.086
323.013	-64.575	-66.772	-66.284	-66.528	-66.406	-66.162	-66.162	-16.357	-8.423	-1.221	323.013	0.162	-0.601	0.544	0.162	0.467	0.925	0.467	0.162	0.162	-0.143
323.213	-64.575	-66.772	-66.284	-66.406	-66.406	-66.162	-66.162	-16.479	-8.789	-1.465	323.213	0.086	-0.601	0.162	0.238	0.544	0.544	0.696	0.238	0.162	-0.296
323.413	-64.575	-66.65	-66.284	-66.406	-66.406	-66.162	-66.162	-16.724	-8.911	-1.709	323.413	-0.143	-0.219	-0.219	0.467	0.162	0.238	0.772	0.467	0.162	-0.067
323.613	-64.575	-66.65	-66.284	-66.406	-66.406	-66.162	-66.162	-16.846	-9.277	-2.075	323.613	-0.296	0.086	-0.143	0.62	-0.143	0.162	0.696	0.62	0.162	0.467
323.813	-64.575	-66.65	-66.406	-66.528	-66.406	-66.284	-66.162	-17.09	-9.521	-2.197	323.813	-0.143	0.162	0.01	0.467	0.162	0.162	0.467	0.467	0.162	0.925
324.013	-64.575	-66.65	-66.284	-66.406	-66.406	-66.284	-66.162	-17.334	-9.644	-2.441	324.013	0.01	0.162	-0.143	0.238	0.544	0.162	0.315	0.238	0.238	0.925
324.213	-64.575	-66.65	-66.284	-66.528	-66.406	-66.162	-66.162	-17.578	-9.888	-2.563	324.213	-0.143	0.162	-0.296	0.238	0.467	0.162	0.467	0.238	0.544	0.544
324.413	-64.575	-66.65	-66.406	-66.406	-66.406	-66.162	-66.284	-17.7	-10.132	-2.93	324.413	-0.219	0.162	-0.067	0.467	0.238	0.238	0.62	0.467	0.925	0.315
324.613	-64.575	-66.65	-66.406	-66.406	-66.406	-66.162	-66.284	-17.822	-10.376	-3.174	324.613	0.162	0.238	0.391	0.62	0.238	0.467	0.467	0.62	0.925	0.391
324.813	-64.575	-66.65	-66.406	-66.406	-66.284	-66.162	-66.284	-18.066	-10.498	-3.418	324.813	0.544	0.467	0.62	0.467	0.467	0.62	0.315	0.467	0.467	0.315
325.013	-64.575	-66.65	-66.528	-66.406	-66.406	-66.162	-66.284	-18.188	-10.742	-3.662	325.013	0.467	0.696	0.467	0.238	0.62	0.391	0.467	0.315	-0.067	0.01
325.213	-64.575	-66.772	-66.406	-66.406	-66.406	-66.162	-66.284	-18.311	-10.986	-3.906	325.213	0.238	0.849	0.238	0.162	0.467	-0.067	0.62	0.544	-0.296	0.01
325.413	-64.575	-66.65	-66.406	-66.406	-66.406	-66.162	-66.284	-18.555	-11.23	-4.15	325.413	0.162	1.001	0.238	0.162	0.315	-0.296	0.467	0.925	-0.143	0.391
325.613	-64.453	-66.65	-66.406	-66.406	-66.406	-66.04	-66.284	-18.677	-11.353	-4.395	325.613	0.162	1.001	0.391	0.162	0.544	-0.143	0.238	0.925	0.086	0.544
325.813	-64.575	-66.772	-66.406	-66.406	-66.406	-66.162	-66.284	-18.799	-11.719	-4.639	325.813	0.162	0.925	0.315	0.162	1.001	0.086	0.162	0.544	0.162	0.162
326.013	-64.575	-66.65	-66.406	-66.406	-66.406	-66.162	-66.284	-19.043	-11.841	-4.883	326.013	0.162	1.001	0.01	0.238	1.23	0.162	0.162	0.238	0.162	-0.296
326.213	-64.575	-66.65	-66.406	-66.406	-66.406	-66.162	-66.284	-19.287	-12.085	-5.127	326.213	0.162	0.925	-0.067	0.467	1.001	0.238	0.162	0.162	0.162	-0.525
326.413	-64.575	-66.65	-66.406	-66.406	-66.406	-66.162	-66.284	-19.409	-12.329	-5.249	326.413	0.162	0.544	0.086	0.62	0.62	0.467	0.162	0.162	0.162	-0.753
326.613	-64.575	-66.772	-66.406	-66.406	-66.406	-66.162	-66.284	-19.531	-12.573	-5.615	326.613	0.162	0.315	0.162	0.467	0.544	0.544	0.238	0.162	0.086	-0.906
326.813	-64.575	-66.65	-66.406	-66.406	-66.406	-66.162	-66.284	-19.775	-12.817	-5.737	326.813	0.238	0.544	0.162	0.315	0.62	0.162	0.467	0.162	-0.143	-0.677
327.013	-64.575	-66.65	-66.406	-66.406	-66.406	-66.162	-66.284	-19.897	-12.939	-6.104	327.013	0.544	0.925	0.238	0.467	0.467	-0.143	0.62	0.238	-0.296	-0.219
327.213	-64.575	-66.65	-66.284	-66.528	-66.406	-66.162	-66.162	-20.142	-13.184	-6.348	327.213	0.925	0.925	0.467	0.62	0.315	0.238	0.467	0.391	-0.143	0.086
327.413	-64.575	-66.65	-66.406	-66.528	-66.406	-66.162	-66.162	-20.264	-13.428	-6.592	327.413	0.925	0.544	0.62	0.467	0.544	0.849	0.238	0.315	0.086	0.162
327.613	-64.575	-66.65	-66.284	-66.406	-66.528	-66.162	-66.162	-20.386	-13.55	-6.836	327.613	0.544	0.315	0.467	0.238	0.925	0.925	0.162	0.01	0.162	0.086
327.813	-64.453	-66.65	-66.284	-66.406	-66.528	-66.162	-66.284	-20.63	-13.794	-6.958	327.813	0.238	0.467	0.315	0.162	0.849	0.544	0.162	0.01	0.162	-0.143
328.013	-64.575	-66.528	-66.284	-66.406	-66.406	-66.162	-66.162	-20.752	-14.038	-7.202	328.013	0.162	0.62	0.544	0.162	0.238	0.238	0.162	0.391	0.162	-0.219
328.213	-64.575	-66.65	-66.284	-66.528	-66.528	-66.162	-66.162	-20.874	-14.282	-7.446	328.213	0.162	0.467	0.925	0.162	-0.219	0.162	0.162	0.62	0.162	0.162
328.413	-64.575	-66.65	-66.406	-66.528	-66.528	-66.162	-66.162	-21.118	-14.526	-7.69	328.413	0.238	0.238	0.849	0.162	-0.143	0.162	0.238	0.391	0.162	0.544
328.613	-64.575	-66.528	-66.284	-66.528	-66.528	-66.284	-66.284	-21.24	-14.771	-7.935	328.613	0.467	0.162	0.238	0.086	0.086	0.162	0.467	0.01	0.162	0.391
328.813	-64.575	-66.528	-66.284	-66.528	-66.528	-66.284	-66.162	-21.362	-14.893	-8.179	328.813	0.62	0.162	-0.219	-0.143	0.162	0.162	0.62	0.01	0.162	-0.067
329.013	-64.575	-66.65	-66.284	-66.528	-66.528	-66.284	-66.162	-21.484	-15.137	-8.423	329.013	0.467	0.162	-0.143	-0.296	0.238	0.162	0.467	0.315	0.086	-0.296
329.213	-64.575	-66.65	-66.284	-66.528	-66.528	-66.284	-66.284	-21.606	-15.259	-8.545	329.213	0.238	0.162	0.086	-0.143	0.467	0.162	0.315	0.391	-0.143	-0.143
329.413	-64.575	-66.65	-66.406	-66.528	-66.528	-66.284	-66.162	-21.729	-15.381	-8.789	329.413	0.238	0.162	0.162	0.086	0.62	0.162	0.467	0.238	-0.372	0.086
329.613	-64.575	-66.65	-66.406	-66.528	-66.406	-66.162	-66.162	-21.973	-15.625	-9.033	329.613	0.467	0.238	0.238	0.238	0.467	0.238	0.696	0.162	-0.448	0.162
329.813	-64.575	-66.65	-66.406	-66.528	-66.528	-66.284	-66.284	-22.095	-15.869	-9.277	329.813	0.62	0.467	0.544	0.467	0.238	0.467	0.696	0.162	-0.296	0.162
330.013	-64.575	-66.65	-66.406	-66.528	-66.406	-66.284	-66.284	-22.217	-15.991	-9.521	330.013	0.467	0.62	0.925	0.62	0.162	0.696	0.467	0.162	0.086	0.086
330.213	-64.575	-66.65	-66.406	-66.406	-66.528	-66.284	-66.284	-22.339	-16.235	-9.766	330.213	0.162	0.544	0.925	0.467	0.162	0.772	0.315	0.162	0.238	-0.143
330.413	-64.575	-66.65	-66.406	-66.528	-66.528	-66.284	-66.284	-22.583	-16.357	-9.888	330.413	-0.143	0.544	0.544	0.238	0.086	0.696	0.391	0.162	0.01	-0.296
330.613	-64.575	-66.65	-66.406	-66.528	-66.528	-66.284	-66.284	-22.705	-16.602	-10.254	330.613	-0.296	0.62	0.238	0.238	-0.143	0.467	0.391	0.162	-0.067	-0.143
330.813	-64.575	-66.772	-66.406	-66.528	-66.406	-66.284	-66.284	-22.705	-16.846	-10.376	330.813	-0.143	0.544	0.162	0.544	-0.296	0.238	0.238	0.162	0.086	0.086
331.013	-64.575	-66.65	-66.406	-66.528	-66.406	-66.284	-66.284	-22.827	-16.968	-10.62	331.013	0.086	0.62	0.238	0.925	-0.143	0.086	0.162	0.162	0.162	0.162
331.213	-64.575	-66.65	-66.528	-66.528	-66.406	-66.284	-66.284	-23.071	-17.09	-10.864	331.213	0.238	0.925	0.467	0.925	0.086	-0.143	0.162	0.086	0.162	0.162
331.413	-64.575	-66.65	-66.528	-66.528	-66.406	-66.284	-66.284	-23.193	-17.334	-10.986	331.413	0.544	0.925	0.62	0.544	0.162	-0.219	0.238	-0.143	0.162	0.086
331.613	-64.575	-66.65	-66.406	-66.528	-66.528	-66.284	-66.284	-23.315	-17.578	-11.23	331.613	0.925	0.544	0.467	0.238	0.162	0.162	0.467	-0.372	0.086	-0.143
331.813	-64.575	-66.65	-66.406	-66.528	-66.406	-66.284	-66.284	-23.56	-17.7	-11.475	331.813	0.925	0.315	0.238	0.162	0.162	0.544	0.62	-0.525	-0.219	-0.296
332.013	-64.575	-66.65	-66.528	-66.528	-66.406	-66.284	-66.284	-23.682	-17.944	-11.719	332.013	0.544	0.544	0.162	0.162	0.162	0.467	0.391	-0.753	-0.601	-0.143
332.213	-64.575	-66.65	-66.406	-66.528	-66.528	-66.284	-66.284	-23.804	-18.066	-11.841	332.213	0.315	0.925	0.162	0.162	0.162	0.238	-0.143	-0.83	-0.601	0.01
332.413	-64.575	-66.772	-66.528	-66.528	-66.406	-66.284	-66.162	-23.926	-18.188	-12.085	332.413	0.544	0.925	0.238	0.238	0.162	0.162	-0.601	-0.372	-0.296	-0.219
332.613	-64.575	-66.65	-66.528	-66.528	-66.406	-66.162	-66.284	-24.048	-18.311	-12.329	332.613	0.925	0.62	0.467	0.467	0.238	0.162	-0.525	0.162	-0.296	-0.601
332.813	-64.575	-66.65	-66.406	-66.528	-66.406	-66.162	-66.284	-24.048	-18.555	-12.573	332.813	0.925	0.544	0.62	0.544	0.391	0.162	0.086	0.086	-0.601	-0.601
333.013	-64.575	-66.528	-66.406	-66.528	-66.528	-66.162	-66.284	-24.292	-18.677	-12.695	333.013	0.544	0.696	0.467	0.086	0.238	0.162	0.544	-0.219	-0.601	-0.296
333.213	-64.575	-66.65	-66.406	-66.528	-66.406	-66.284	-66.162	-24.414	-18.921	-12.817	333.213	0.238	0.696	0.238	-0.448	-0.296	0.162	0.467	-0.143	-0.296	-0.219
333.413	-64.575	-66.65	-66.406	-66.528	-66.528	-66.162	-66.162	-24.536	-19.043	-13.062	333.413	0.162	0.391	0.162	-0.296	-0.525	0.162	0.162	0.01	-0.296	-0.372
333.613	-64.575	-66.65	-66.406	-66.528	-66.528	-66.162	-66.162	-24.658	-19.165	-13.306	333.613	0.086	0.01	0.162	0.162	-0.219	0.162	-0.143	-0.219	-0.677	-0.525
333.813	-64.575	-66.65	-66.406	-66.528	-66.528	-66.162	-66.162	-24.78	-19.409	-13.428	333.813	-0.143	-0.067	0.162	0.01	0.086	0.162	-0.296	-0.601	-0.906	-0.753
334.013	-64.575	-66.65	-66.284	-66.528	-66.528	-66.162	-66.162	-24.902	-19.531	-13.672	334.013	-0.296	0.086	0.162	-0.601	0.162	0.162	-0.219	-0.525	-0.753	-0.906
334.213	-64.575	-66.528	-66.406	-66.528	-66.528	-66.162	-66.162	-25.024	-19.775	-13.794	334.213	-0.219	0.162	0.162	-0.906	0.162	0.162	-0.219	0.01	-0.601	-0.753
334.413	-64.575	-66.528	-66.406	-66.528	-66.528	-66.162	-66.162	-25.146	-19.897	-14.038	334.413	-0.296	0.238	0.162	-0.677	0.162	0.086	-0.296	0.162	-0.753	-0.525
334.613	-64.575	-66.528	-66.406	-66.528	-66.528	-66.162	-66.162	-25.269	-20.142	-14.16	334.613	-0.677	0.467	0.162	-0.219	0.162	-0.143	-0.143	-0.372	-0.982	-0.448
334.813	-64.575	-66.528	-66.406	-66.528	-66.528	-66.284	-66.162	-25.391	-20.264	-14.404	334.813	-0.906	0.62	0.162	0.086	0.086	-0.296	0.086	-0.83	-0.982	-0.525
335.013	-64.575	-66.65	-66.406	-66.528	-66.528	-66.162	-66.162	-25.513	-20.508	-14.648	335.013	-0.677	0.391	0.162	0.162	-0.143	-0.143	0.162	-0.753	-0.677	-0.753
335.213	-64.575	-66.65	-66.406	-66.528	-66.528	-66.162	-66.162	-25.635	-20.63	-14.771	335.213	-0.219	-0.067	0.162	0.162	-0.296	0.01	0.086	-0.525	-0.296	-0.982
335.413	-64.575	-66.65	-66.406	-66.528	-66.65	-66.284	-66.162	-25.757	-20.752	-15.015	335.413	0.086	-0.296	0.162	0.086	-0.143	-0.219	-0.143	-0.448	-0.219	-1.059
335.613	-64.575	-66.65	-66.406	-66.528	-66.528	-66.284	-66.162	-25.879	-20.996	-15.137	335.613	0.086	-0.143	0.162	-0.219	0.01	-0.677	-0.296	-0.448	-0.372	-1.059
335.813	-64.575	-66.65	-66.406	-66.65	-66.528	-66.284	-66.04	-26.001	-21.118	-15.381	335.813	-0.219	0.086	0.162	-0.601	-0.143	-0.906	-0.143	-0.372	-0.448	-0.982
336.013	-64.697	-66.65	-66.406	-66.65	-66.528	-66.162	-66.04	-26.123	-21.24	-15.503	336.013	-0.601	0.162	0.162	-0.601	-0.219	-0.677	0.086	-0.219	-0.448	-0.677
336.213	-64.575	-66.65	-66.406	-66.528	-66.528	-66.284	-66.162	-26.245	-21.362	-15.747	336.213	-0.677	0.162	0.162	-0.219	0.162	-0.219	0.162	-0.296	-0.525	-0.219
336.413	-64.575	-66.65	-66.406	-66.65	-66.528	-66.284	-66.162	-26.489	-21.606	-15.869	336.413	-0.601	0.162	0.162	0.086	0.544	0.086	0.162	-0.677	-0.677	0.086
336.613	-64.575	-66.65	-66.406	-66.528	-66.528	-66.284	-66.162	-26.489	-21.729	-16.113	336.613	-0.601	0.086	0.162	0.086	0.467	0.086	0.162	-0.906	-0.601	0.086
336.813	-64.575	-66.65	-66.406	-66.528	-66.528	-66.284	-66.162	-26.611	-21.851	-16.235	336.813	-0.296	-0.219	0.086	-0.143	0.315	-0.143	0.162	-0.677	-0.219	-0.219
337.013	-64.575	-66.65	-66.406	-66.528	-66.528	-66.284	-66.162	-26.733	-21.973	-16.357	337.013	0.162	-0.601	-0.143	-0.296	0.391	-0.296	0.162	-0.296	0.086	-0.601
337.213	-64.575	-66.65	-66.406	-66.65	-66.528	-66.284	-66.162	-26.855	-22.095	-16.602	337.213	0.01	-0.601	-0.296	-0.143	0.238	-0.143	0.238	-0.296	0.086	-0.677
337.413	-64.575	-66.65	-66.406	-66.65	-66.528	-66.162	-66.162	-26.978	-22.217	-16.724	337.413	-0.525	-0.219	-0.143	0.01	-0.296	0.01	0.467	-0.601	-0.143	-0.525
337.614	-64.575	-66.65	-66.406	-66.65	-66.528	-66.162	-66.162	-27.1	-22.461	-16.968	337.614	-0.601	0.086	0.086	-0.143	-0.448	-0.067	0.62	-0.677	-0.296	-0.372
337.814	-64.575	-66.528	-66.528	-66.65	-66.528	-66.284	-66.162	-27.222	-22.583	-17.09	337.814	-0.296	0.162	0.086	-0.296	0.086	-0.067	0.391	-0.601	-0.143	-0.219
338.014	-64.575	-66.65	-66.528	-66.65	-66.406	-66.284	-66.162	-27.344	-22.705	-17.334	338.014	-0.219	0.086	-0.219	-0.143	0.544	-0.067	0.01	-0.753	0.01	-0.296
338.214	-64.575	-66.65	-66.406	-66.65	-66.528	-66.284	-66.162	-27.466	-22.827	-17.456	338.214	-0.296	-0.143	-0.677	0.01	0.391	-0.448	0.01	-0.906	-0.143	-0.601
338.414	-64.575	-66.65	-66.406	-66.528	-66.406	-66.284	-66.162	-27.588	-22.949	-17.578	338.414	-0.143	-0.296	-0.906	-0.143	-0.067	-0.83	0.315	-0.677	-0.296	-0.601
338.614	-64.575	-66.65	-66.406	-66.65	-66.528	-66.284	-66.162	-27.71	-23.071	-17.7	338.614	0.086	-0.143	-0.677	-0.372	-0.296	-0.677	0.391	-0.219	-0.219	-0.296
338.814	-64.575	-66.65	-66.406	-66.528	-66.528	-66.162	-66.162	-27.832	-23.315	-17.944	338.814	0.162	0.01	-0.219	-0.525	-0.143	-0.296	0.162	0.01	-0.296	-0.296
339.014	-64.575	-66.65	-66.406	-66.528	-66.528	-66.162	-66.162	-27.954	-23.315	-18.066	339.014	0.162	-0.143	0.01	-0.677	0.01	-0.296	-0.143	-0.143	-0.677	-0.677
339.214	-64.575	-66.65	-66.406	-66.528	-66.528	-66.162	-66.162	-28.076	-23.56	-18.188	339.214	0.086	-0.372	-0.143	-0.677	-0.143	-0.601	-0.296	-0.219	-0.83	-0.906
339.414	-64.575	-66.65	-66.284	-66.528	-66.528	-66.162	-66.04	-28.198	-23.682	-18.433	339.414	-0.143	-0.525	-0.296	-0.525	-0.296	-0.525	-0.143	0.162	-0.372	-0.677
339.614	-64.575	-66.65	-66.406	-66.528	-66.528	-66.284	-66.04	-28.198	-23.804	-18.555	339.614	-0.296	-0.677	-0.143	-0.372	-0.067	0.086	0.086	0.544	0.238	-0.296
339.814	-64.575	-66.528	-66.284	-66.528	-66.528	-66.162	-66.162	-28.32	-23.926	-18.677	339.814	-0.219	-0.601	0.086	-0.219	0.391	0.544	0.162	0.391	0.315	-0.296
340.014	-64.575	-66.65	-66.284	-66.528	-66.528	-66.162	-66.04	-28.442	-24.17	-18.921	340.014	-0.219	-0.219	0.162	-0.219	0.544	0.391	0.162	-0.067	-0.067	-0.601
340.214	-64.575	-66.528	-66.284	-66.65	-66.528	-66.284	-66.04	-28.564	-24.292	-19.043	340.214	-0.296	0.086	0.162	-0.296	0.162	-0.067	0.086	-0.296	-0.296	-0.601
340.414	-64.575	-66.528	-66.284	-66.65	-66.528	-66.162	-66.04	-28.687	-24.414	-19.165	340.414	-0.143	0.162	0.086	-0.219	-0.219	-0.219	-0.219	-0.219	-0.143	-0.296
340.614	-64.575	-66.528	-66.284	-66.65	-66.528	-66.162	-66.04	-28.809	-24.536	-19.409	340.614	0.086	0.162	-0.219	-0.219	-0.143	0.086	-0.601	-0.219	0.01	-0.219
340.814	-64.575	-66.528	-66.406	-66.65	-66.528	-66.284	-66.04	-28.931	-24.658	-19.531	340.814	0.162	0.162	-0.601	-0.372	0.086	0.315	-0.601	-0.372	-0.219	-0.296
341.014	-64.575	-66.528	-66.406	-66.65	-66.528	-66.284	-66.162	-29.053	-24.78	-19.775	341.014	0.162	0.162	-0.525	-0.448	0.162	0.315	-0.219	-0.448	-0.601	-0.143
341.214	-64.575	-66.528	-66.284	-66.65	-66.528	-66.284	-66.04	-29.175	-24.902	-19.897	341.214	0.162	0.162	0.162	-0.372	0.162	0.391	0.086	-0.372	-0.601	0.086
341.414	-64.575	-66.528	-66.284	-66.65	-66.65	-66.284	-66.04	-29.297	-25.024	-20.142	341.414	0.086	0.162	0.849	-0.143	0.162	0.315	0.162	-0.143	-0.219	0.086
341.614	-64.575	-66.65	-66.284	-66.65	-66.528	-66.162	-66.04	-29.297	-25.146	-20.264	341.614	-0.219	0.162	0.849	0.086	0.162	-0.067	0.162	0.086	0.086	-0.143
341.814	-64.453	-66.528	-66.284	-66.65	-66.65	-66.162	-66.04	-29.419	-25.269	-20.386	341.814	-0.601	0.162	0.315	0.162	0.086	-0.372	0.162	0.162	0.162	-0.296
342.014	-64.453	-66.528	-66.406	-66.528	-66.528	-66.162	-66.04	-29.541	-25.513	-20.508	342.014	-0.601	0.162	0.086	0.162	-0.219	-0.448	0.162	0.086	0.162	-0.143
342.214	-64.575	-66.528	-66.284	-66.65	-66.528	-66.162	-66.04	-29.663	-25.635	-20.752	342.214	-0.219	0.086	0.315	0.086	-0.601	-0.372	0.162	-0.219	0.162	0.086
342.414	-64.575	-66.528	-66.284	-66.65	-66.528	-66.162	-66.04	-29.663	-25.757	-20.874	342.414	0.086	-0.143	0.315	-0.143	-0.601	-0.143	0.086	-0.601	0.162	0.162
342.614	-64.575	-66.528	-66.284	-66.65	-66.528	-66.284	-66.04	-29.907	-25.879	-20.996	342.614	0.162	-0.296	0.01	-0.296	-0.143	0.086	-0.143	-0.525	0.162	0.162
342.814	-64.453	-66.65	-66.284	-66.528	-66.528	-66.162	-65.918	-30.029	-26.001	-21.24	342.814	0.162	-0.143	0.01	-0.143	0.391	0.162	-0.372	0.086	0.162	0.238
343.014	-64.453	-66.65	-66.284	-66.528	-66.528	-66.284	-66.04	-30.029	-26.123	-21.362	343.014	0.162	0.086	0.315	0.162	0.62	0.238	-0.448	0.467	0.162	0.544
343.214	-64.453	-66.65	-66.284	-66.528	-66.528	-66.284	-66.04	-30.151	-26.245	-21.484	343.214	0.238	0.238	0.391	0.391	0.467	0.467	-0.372	0.162	0.162	0.925
343.414	-64.575	-66.528	-66.406	-66.65	-66.528	-66.284	-66.04	-30.273	-26.367	-21.606	343.414	0.467	0.544	0.315	0.315	0.238	0.62	-0.067	-0.219	0.162	0.925
343.614	-64.453	-66.65	-66.284	-66.65	-66.528	-66.284	-66.04	-30.396	-26.489	-21.729	343.614	0.696	0.925	0.544	0.01	0.162	0.544	0.391	-0.219	0.162	0.62
343.814	-64.453	-66.528	-66.284	-66.528	-66.528	-66.284	-66.04	-30.518	-26.611	-21.851	343.814	0.772	0.925	0.925	-0.067	0.162	0.62	0.62	-0.219	0.238	0.544
344.014	-64.453	-66.528	-66.284	-66.528	-66.528	-66.162	-65.918	-30.64	-26.733	-21.973	344.014	0.62	0.544	0.925	0.01	0.162	0.925	0.467	-0.296	0.467	0.544
344.214	-64.453	-66.65	-66.284	-66.65	-66.528	-66.162	-66.04	-30.64	-26.855	-22.217	344.214	0.162	0.238	0.544	-0.143	0.162	0.925	0.315	-0.143	0.696	0.162
344.414	-64.453	-66.528	-66.406	-66.65	-66.528	-66.162	-66.04	-30.762	-26.978	-22.339	344.414	-0.143	0.162	0.238	-0.296	0.162	0.544	0.467	0.086	0.772	-0.219
344.614	-64.453	-66.65	-66.284	-66.528	-66.528	-66.162	-66.04	-30.884	-27.1	-22.583	344.614	0.162	0.162	0.162	-0.143	0.162	0.315	0.696	0.238	0.696	-0.143
344.814	-64.453	-66.65	-66.284	-66.528	-66.406	-66.162	-66.04	-31.006	-27.1	-22.705	344.814	0.544	0.162	0.162	0.162	0.162	0.467	0.849	0.467	0.467	0.01
345.014	-64.453	-66.65	-66.284	-66.65	-66.528	-66.162	-66.04	-31.006	-27.222	-22.705	345.014	0.544	0.238	0.162	0.391	0.162	0.62	1.078	0.62	0.238	-0.067
345.214	-64.453	-66.65	-66.284	-66.528	-66.528	-66.162	-66.04	-31.128	-27.466	-22.827	345.214	0.544	0.467	0.162	0.315	0.162	0.544	1.23	0.467	0.162	-0.067
345.414	-64.453	-66.65	-66.284	-66.528	-66.406	-66.284	-66.04	-31.25	-27.466	-22.949	345.414	0.696	0.62	0.162	0.01	0.162	0.62	1.001	0.315	0.162	0.086
345.614	-64.453	-66.65	-66.284	-66.528	-66.528	-66.162	-66.04	-31.25	-27.588	-23.193	345.614	0.772	0.467	0.162	0.01	0.238	0.925	0.62	0.467	0.162	0.238
345.814	-64.453	-66.528	-66.284	-66.528	-66.528	-66.162	-66.04	-31.372	-27.832	-23.315	345.814	0.696	0.238	0.162	0.467	0.467	0.925	0.62	0.62	0.162	0.391
346.014	-64.453	-66.65	-66.284	-66.528	-66.528	-66.284	-66.04	-31.616	-27.954	-23.438	346.014	0.467	0.238	0.162	0.925	0.62	0.467	1.001	0.467	0.162	0.391
346.214	-64.453	-66.65	-66.284	-66.528	-66.528	-66.284	-66.04	-31.616	-28.076	-23.56	346.214	0.315	0.544	0.238	0.925	0.467	-0.067	1.23	0.315	0.238	0.162
346.414	-64.453	-66.65	-66.284	-66.528	-66.528	-66.284	-66.04	-31.738	-28.198	-23.682	346.414	0.544	0.925	0.544	0.62	0.238	-0.296	1.001	0.467	0.467	-0.143
346.614	-64.453	-66.528	-66.284	-66.65	-66.528	-66.162	-66.04	-31.86	-28.198	-23.804	346.614	0.925	0.925	1.001	0.544	0.238	-0.143	0.544	0.62	0.544	-0.296
346.814	-64.453	-66.528	-66.284	-66.528	-66.528	-66.284	-66.04	-31.982	-28.32	-24.048	346.814	0.925	0.62	1.23	0.696	0.467	0.162	0.238	0.391	0.238	-0.143
347.014	-64.453	-66.528	-66.284	-66.65	-66.528	-66.284	-66.04	-32.104	-28.442	-24.17	347.014	0.62	0.544	1.001	0.772	0.62	0.467	0.162	0.01	0.162	0.086
347.214	-64.453	-66.528	-66.284	-66.528	-66.528	-66.284	-66.04	-32.227	-28.687	-24.292	347.214	0.62	0.62	0.62	0.772	0.467	0.696	0.162	0.01	0.62	0.162
347.414	-64.453	-66.528	-66.406	-66.65	-66.65	-66.284	-66.04	-32.349	-28.809	-24.414	347.414	0.925	0.467	0.62	0.772	0.315	0.849	0.162	0.315	0.849	0.162
347.614	-64.453	-66.528	-66.406	-66.65	-66.65	-66.284	-66.04	-32.349	-28.931	-24.658	347.614	0.925	0.238	0.925	0.696	0.467	1.001	0.238	0.315	0.62	0.162
347.814	-64.453	-66.528	-66.284	-66.65	-66.65	-66.284	-66.04	-32.471	-29.053	-24.78	347.814	0.544	0.162	1.001	0.467	0.62	0.925	0.467	-0.067	0.544	0.162
348.014	-64.453	-66.528	-66.284	-66.65	-66.65	-66.284	-66.04	-32.593	-29.175	-24.902	348.014	0.315	0.238	0.925	0.238	0.467	0.544	0.62	-0.296	0.62	0.162
348.214	-64.453	-66.528	-66.284	-66.65	-66.65	-66.284	-66.04	-32.715	-29.297	-25.146	348.214	0.467	0.467	1.001	0.238	0.238	0.238	0.467	-0.143	0.467	0.162
348.414	-64.453	-66.528	-66.406	-66.65	-66.65	-66.284	-66.04	-32.715	-29.419	-25.146	348.414	0.544	0.544	0.849	0.467	0.238	0.086	0.238	0.086	0.238	0.086
348.614	-64.453	-66.528	-66.284	-66.65	-66.65	-66.284	-66.04	-32.837	-29.541	-25.269	348.614	0.162	0.162	0.238	0.62	0.467	-0.143	0.162	0.162	0.162	-0.143
348.814	-64.453	-66.528	-66.284	-66.65	-66.65	-66.284	-66.04	-32.959	-29.663	-25.391	348.814	-0.143	-0.219	-0.143	0.467	0.62	-0.296	0.238	0.162	0.238	-0.296
349.014	-64.453	-66.528	-66.284	-66.65	-66.65	-66.284	-65.918	-33.081	-29.785	-25.635	349.014	0.162	-0.143	0.238	0.238	0.467	-0.143	0.467	0.162	0.467	-0.067
349.214	-64.453	-66.528	-66.406	-66.65	-66.528	-66.284	-65.918	-33.203	-29.907	-25.757	349.214	0.544	0.086	0.849	0.238	0.238	0.01	0.62	0.162	0.62	0.391
349.414	-64.453	-66.528	-66.284	-66.65	-66.65	-66.284	-66.04	-33.203	-30.029	-25.879	349.414	0.467	0.162	1.001	0.467	0.162	-0.143	0.467	0.162	0.467	0.62
349.614	-64.453	-66.528	-66.406	-66.65	-66.528	-66.284	-66.04	-33.325	-30.151	-26.001	349.614	0.238	0.162	0.849	0.62	0.162	-0.219	0.238	0.162	0.238	0.467
349.814	-64.575	-66.528	-66.284	-66.65	-66.528	-66.284	-66.04	-33.447	-30.273	-26.245	349.814	0.162	0.162	0.772	0.391	0.162	0.162	0.162	0.162	0.162	0.238
350.014	-64.453	-66.528	-66.406	-66.65	-66.65	-66.284	-66.04	-33.569	-30.396	-26.245	350.014	0.162	0.086	0.772	-0.067	0.238	0.544	0.162	0.162	0.162	0.162
350.214	-64.453	-66.528	-66.284	-66.65	-66.65	-66.284	-66.04	-33.569	-30.518	-26.489	350.214	0.162	-0.143	0.696	-0.296	0.544	0.467	0.162	0.162	0.162	0.162
350.414	-64.453	-66.528	-66.406	-66.528	-66.528	-66.284	-66.04	-33.691	-30.64	-26.611	350.414	0.162	-0.296	0.544	-0.143	0.925	0.238	0.238	0.162	0.162	0.162
350.614	-64.453	-66.528	-66.406	-66.528	-66.528	-66.284	-66.04	-33.813	-30.64	-26.733	350.614	0.162	-0.067	0.544	0.01	0.925	0.162	0.467	0.238	0.162	0.162
350.814	-64.575	-66.528	-66.406	-66.528	-66.528	-66.284	-66.04	-33.936	-30.762	-26.855	350.814	0.162	0.391	0.62	-0.143	0.62	0.162	0.62	0.467	0.162	0.162
351.014	-64.453	-66.528	-66.284	-66.528	-66.65	-66.284	-66.04	-34.058	-30.884	-26.978	351.014	0.162	0.62	0.391	-0.296	0.544	0.162	0.544	0.62	0.086	0.086
351.214	-64.575	-66.65	-66.406	-66.528	-66.528	-66.284	-66.04	-34.18	-31.006	-27.1	351.214	0.162	0.467	-0.067	-0.143	0.62	0.162	0.62	0.467	-0.143	-0.143
351.414	-64.575	-66.528	-66.406	-66.528	-66.528	-66.284	-65.918	-34.18	-31.128	-27.222	351.414	0.238	0.238	-0.219	0.086	0.467	0.238	0.925	0.238	-0.296	-0.296
351.614	-64.575	-66.528	-66.406	-66.528	-66.528	-66.284	-66.04	-34.302	-31.128	-27.344	351.614	0.544	0.162	0.162	0.162	0.315	0.544	0.925	0.162	-0.143	-0.143
351.814	-64.453	-66.528	-66.406	-66.528	-66.65	-66.284	-66.04	-34.424	-31.25	-27.466	351.814	1.001	0.162	0.544	0.238	0.467	1.001	0.544	0.162	0.086	0.01
352.014	-64.453	-66.528	-66.406	-66.528	-66.65	-66.284	-66.04	-34.546	-31.372	-27.588	352.014	1.23	0.162	0.467	0.467	0.62	1.23	0.238	0.162	0.162	-0.219
352.214	-64.453	-66.528	-66.284	-66.528	-66.65	-66.406	-66.04	-34.668	-31.494	-27.71	352.214	0.925	0.238	0.315	0.62	0.467	0.925	0.162	0.086	0.162	-0.601
352.414	-64.453	-66.528	-66.284	-66.528	-66.528	-66.284	-66.04	-34.668	-31.616	-27.832	352.414	0.238	0.467	0.467	0.467	0.238	0.162	0.162	-0.143	0.162	-0.601
352.614	-64.453	-66.528	-66.284	-66.65	-66.65	-66.284	-66.04	-34.79	-31.738	-27.954	352.614	-0.219	0.62	0.62	0.238	0.162	-0.525	0.162	-0.296	0.162	-0.296
352.814	-64.575	-66.528	-66.406	-66.65	-66.65	-66.284	-66.04	-34.912	-31.86	-28.076	352.814	-0.143	0.467	0.544	0.162	0.162	-0.601	0.162	-0.219	0.162	-0.219
353.014	-64.575	-66.528	-66.406	-66.65	-66.65	-66.284	-65.918	-35.034	-32.104	-28.198	353.014	0.086	0.238	0.62	0.086	0.086	-0.219	0.162	-0.219	0.086	-0.372
353.214	-64.453	-66.528	-66.406	-66.65	-66.65	-66.284	-66.04	-35.156	-32.104	-28.32	353.214	0.238	0.162	1.001	-0.143	-0.219	0.086	0.162	-0.296	-0.143	-0.525
353.414	-64.453	-66.528	-66.284	-66.65	-66.65	-66.284	-66.04	-35.278	-32.227	-28.442	353.414	0.467	0.162	1.23	-0.296	-0.601	0.162	0.162	-0.143	-0.296	-0.677
353.614	-64.575	-66.528	-66.284	-66.65	-66.528	-66.284	-66.04	-35.278	-32.227	-28.564	353.614	0.544	0.086	1.001	-0.143	-0.525	0.162	0.162	0.01	-0.143	-0.677
353.814	-64.453	-66.528	-66.284	-66.65	-66.65	-66.284	-66.04	-35.4	-32.471	-28.687	353.814	0.162	-0.143	0.544	0.086	0.162	0.162	0.162	-0.219	0.086	-0.601
354.014	-64.575	-66.528	-66.284	-66.65	-66.65	-66.284	-66.04	-35.522	-32.593	-28.809	354.014	-0.219	-0.219	0.238	0.162	0.849	0.086	0.162	-0.601	0.162	-0.753
354.214	-64.575	-66.528	-66.284	-66.65	-66.65	-66.284	-66.04	-35.645	-32.715	-28.931	354.214	-0.143	0.162	0.238	0.162	0.849	-0.143	0.162	-0.601	0.086	-0.906
354.414	-64.575	-66.528	-66.284	-66.772	-66.65	-66.284	-65.918	-35.767	-32.837	-29.053	354.414	0.086	0.544	0.467	0.162	0.238	-0.296	0.162	-0.219	-0.219	-0.677
354.614	-64.575	-66.528	-66.284	-66.772	-66.65	-66.284	-66.04	-35.889	-32.959	-29.175	354.614	0.086	0.467	0.62	0.086	-0.143	-0.143	0.162	0.01	-0.601	-0.296
354.814	-64.575	-66.528	-66.284	-66.772	-66.65	-66.284	-66.04	-35.889	-33.081	-29.297	354.814	-0.143	0.238	0.467	-0.143	0.086	0.01	0.162	-0.219	-0.677	-0.219
355.014	-64.575	-66.528	-66.284	-66.772	-66.65	-66.284	-66.04	-36.011	-33.203	-29.419	355.014	-0.296	0.086	0.315	-0.296	0.162	-0.143	0.162	-0.601	-0.525	-0.296
355.214	-64.575	-66.528	-66.406	-66.65	-66.65	-66.406	-66.04	-36.011	-33.325	-29.541	355.214	-0.143	-0.219	0.467	-0.143	-0.296	-0.372	0.086	-0.677	-0.448	-0.219
355.414	-64.575	-66.528	-66.406	-66.772	-66.65	-66.284	-66.04	-36.133	-33.325	-29.663	355.414	0.086	-0.601	0.62	0.086	-0.525	-0.525	-0.143	-0.601	-0.448	-0.296
355.614	-64.575	-66.528	-66.406	-66.65	-66.772	-66.284	-66.04	-36.255	-33.569	-29.785	355.614	0.162	-0.601	0.467	0.162	-0.296	-0.753	-0.219	-0.677	-0.448	-0.601
355.814	-64.575	-66.528	-66.284	-66.65	-66.65	-66.284	-66.04	-36.377	-33.569	-29.907	355.814	0.086	-0.296	0.162	0.086	-0.296	-0.906	0.162	-0.601	-0.448	-0.601
356.014	-64.697	-66.528	-66.284	-66.65	-66.65	-66.284	-66.04	-36.499	-33.691	-30.029	356.014	-0.143	-0.219	-0.219	-0.143	-0.601	-0.677	0.467	-0.219	-0.372	-0.219
356.214	-64.575	-66.528	-66.406	-66.65	-66.65	-66.406	-66.04	-36.621	-33.813	-30.151	356.214	-0.372	-0.372	-0.601	-0.296	-0.601	-0.296	0.086	0.01	-0.219	0.01
356.414	-64.575	-66.528	-66.406	-66.65	-66.65	-66.284	-66.04	-36.621	-33.936	-30.273	356.414	-0.525	-0.448	-0.601	-0.219	-0.296	-0.219	-0.525	-0.143	-0.219	-0.219
356.614	-64.575	-66.528	-66.406	-66.65	-66.65	-66.284	-66.04	-36.743	-33.936	-30.396	356.614	-0.677	-0.372	-0.219	-0.296	-0.219	-0.372	-0.601	-0.296	-0.296	-0.677
356.814	-64.575	-66.528	-66.284	-66.65	-66.65	-66.284	-65.918	-36.865	-34.058	-30.518	356.814	-0.601	-0.143	0.01	-0.601	-0.296	-0.448	-0.219	-0.143	-0.143	-0.982
357.014	-64.575	-66.528	-66.284	-66.65	-66.772	-66.406	-65.918	-36.865	-34.18	-30.64	357.014	-0.219	0.086	-0.219	-0.601	-0.143	-0.372	0.086	0.01	0.086	-1.059
357.214	-64.575	-66.528	-66.284	-66.65	-66.772	-66.284	-65.918	-36.987	-34.302	-30.762	357.214	0.01	0.162	-0.601	-0.219	0.086	-0.143	0.162	-0.143	0.162	-1.059
357.414	-64.697	-66.528	-66.284	-66.65	-66.65	-66.284	-66.04	-37.109	-34.424	-30.884	357.414	-0.143	0.162	-0.601	0.01	0.086	0.086	0.162	-0.296	0.162	-0.982
357.614	-64.575	-66.528	-66.406	-66.65	-66.65	-66.406	-66.04	-37.231	-34.546	-30.884	357.614	-0.296	0.086	-0.219	-0.143	-0.143	0.162	0.162	-0.143	0.086	-0.677
357.814	-64.575	-66.528	-66.284	-66.528	-66.65	-66.284	-66.04	-37.231	-34.668	-31.128	357.814	-0.143	-0.143	0.01	-0.296	-0.296	0.162	0.162	0.01	-0.219	-0.219
358.014	-64.575	-66.528	-66.284	-66.528	-66.65	-66.284	-66.04	-37.354	-34.668	-31.128	358.014	0.01	-0.372	-0.143	-0.067	-0.219	0.162	0.162	-0.143	-0.677	0.086
358.214	-64.575	-66.528	-66.284	-66.528	-66.772	-66.284	-65.918	-37.476	-34.79	-31.372	358.214	-0.143	-0.525	-0.219	0.391	-0.296	0.086	0.162	-0.296	-0.906	0.086
358.414	-64.575	-66.528	-66.284	-66.528	-66.65	-66.284	-66.04	-37.476	-34.912	-31.372	358.414	-0.296	-0.753	0.086	0.62	-0.601	-0.143	0.162	-0.143	-0.677	-0.143
358.614	-64.575	-66.406	-66.284	-66.65	-66.65	-66.284	-66.04	-37.598	-35.034	-31.494	358.614	-0.143	-0.906	0.238	0.467	-0.601	-0.296	0.162	0.086	-0.296	-0.296
358.814	-64.575	-66.528	-66.284	-66.528	-66.65	-66.284	-66.04	-37.72	-35.156	-31.616	358.814	0.086	-0.677	0.01	0.238	-0.219	-0.143	0.162	0.162	-0.296	-0.143
359.014	-64.697	-66.528	-66.284	-66.528	-66.65	-66.284	-66.04	-37.842	-35.278	-31.738	359.014	0.086	-0.219	-0.143	0.162	0.01	0.086	0.162	0.162	-0.677	0.086
359.214	-64.575	-66.528	-66.406	-66.528	-66.65	-66.284	-66.04	-37.964	-35.4	-31.86	359.214	-0.219	0.086	-0.219	0.086	-0.219	0.162	0.162	0.086	-0.906	0.086
359.414	-64.575	-66.528	-66.284	-66.528	-66.65	-66.284	-66.04	-38.086	-35.522	-31.982	359.414	-0.601	0.086	-0.372	-0.143	-0.677	0.162	0.162	-0.143	-0.677	-0.219
359.614	-64.575	-66.528	-66.284	-66.528	-66.65	-66.284	-66.04	-38.086	-35.645	-32.104	359.614	-0.601	-0.143	-0.525	-0.296	-0.83	0.162	0.162	-0.296	-0.219	-0.601
359.814	-64.697	-66.528	-66.284	-66.65	-66.65	-66.284	-66.04	-38.208	-35.767	-32.227	359.814	-0.219	-0.296	-0.677	-0.067	-0.448	0.162	0.086	-0.219	0.086	-0.601
360.014	-64.575	-66.528	-66.284	-66.528	-66.65	-66.284	-66.04	-38.208	-35.889	-32.349	360.014	0.01	-0.219	-0.601	0.315	-0.067	0.162	-0.143	-0.296	0.086	-0.219
360.214	-64.575	-66.528	-66.284	-66.65	-66.65	-66.284	-66.04	-38.452	-35.889	-32.471	360.214	-0.143	-0.219	-0.219	0.315	-0.067	0.162	-0.296	-0.601	-0.143	0.01
360.414	-64.697	-66.406	-66.284	-66.528	-66.65	-66.284	-66.04	-38.452	-36.011	-32.593	360.414	-0.296	-0.372	0.086	-0.067	-0.143	0.162	-0.219	-0.677	-0.296	-0.219
360.614	-64.697	-66.528	-66.284	-66.65	-66.65	-66.284	-66.04	-38.574	-36.133	-32.715	360.614	-0.143	-0.448	0.162	-0.372	-0.219	0.162	-0.296	-0.525	-0.143	-0.601
360.814	-64.575	-66.528	-66.284	-66.65	-66.528	-66.284	-66.04	-38.696	-36.255	-32.837	360.814	0.01	-0.372	0.086	-0.372	-0.219	0.162	-0.601	-0.448	0.086	-0.601
361.014	-64.575	-66.406	-66.284	-66.65	-66.65	-66.284	-66.04	-38.818	-36.377	-32.959	361.014	-0.143	-0.143	-0.143	-0.143	0.162	0.162	-0.601	-0.525	0.162	-0.219
361.214	-64.575	-66.406	-66.284	-66.65	-66.65	-66.284	-66.04	-38.94	-36.499	-33.081	361.214	-0.296	0.086	-0.296	0.086	0.544	0.086	-0.219	-0.677	0.162	0.086
361.414	-64.697	-66.406	-66.284	-66.65	-66.65	-66.284	-66.04	-38.94	-36.621	-33.203	361.414	-0.143	0.162	-0.143	0.162	0.467	-0.143	0.086	-0.677	0.162	0.162
361.614	-64.575	-66.406	-66.284	-66.528	-66.65	-66.284	-66.04	-38.94	-36.743	-33.203	361.614	0.086	0.162	0.086	0.162	0.238	-0.296	0.162	-0.525	0.162	0.162
361.814	-64.697	-66.528	-66.284	-66.65	-66.65	-66.284	-66.04	-39.062	-36.743	-33.325	361.814	0.162	0.162	0.162	0.086	0.086	-0.143	0.162	-0.448	0.162	0.162
362.014	-64.697	-66.528	-66.284	-66.65	-66.65	-66.162	-66.04	-39.185	-36.865	-33.447	362.014	0.162	0.162	0.086	-0.143	-0.219	0.086	0.162	-0.448	0.162	0.086
362.214	-64.697	-66.528	-66.406	-66.65	-66.65	-66.284	-66.04	-39.307	-36.987	-33.569	362.214	0.162	0.162	-0.219	-0.296	-0.525	0.238	0.162	-0.372	0.162	-0.067
362.414	-64.575	-66.528	-66.284	-66.65	-66.65	-66.284	-66.04	-39.307	-37.109	-33.691	362.414	0.162	0.162	-0.677	-0.143	-0.219	0.544	0.162	-0.143	0.162	0.086
362.615	-64.575	-66.528	-66.406	-66.65	-66.65	-66.162	-66.04	-39.429	-37.231	-33.813	362.615	0.162	0.238	-0.906	0.086	0.544	0.925	0.238	0.086	0.162	0.62
362.815	-64.697	-66.528	-66.406	-66.65	-66.772	-66.284	-66.04	-39.551	-37.231	-33.936	362.815	0.162	0.467	-0.677	0.162	0.849	0.849	0.544	0.162	0.162	0.849
363.015	-64.697	-66.528	-66.406	-66.65	-66.65	-66.284	-66.04	-39.551	-37.354	-34.058	363.015	0.162	0.544	-0.219	0.162	0.544	0.238	0.925	0.162	0.162	0.544
363.215	-64.697	-66.406	-66.406	-66.65	-66.65	-66.284	-66.04	-39.673	-37.476	-34.18	363.215	0.162	0.162	0.086	0.238	0.238	-0.143	0.925	0.162	0.162	0.315
363.415	-64.697	-66.528	-66.406	-66.528	-66.65	-66.162	-66.04	-39.673	-37.476	-34.302	363.415	0.162	-0.219	0.162	0.467	0.162	0.162	0.62	0.162	0.086	0.467
363.615	-64.697	-66.528	-66.406	-66.528	-66.65	-66.284	-66.04	-39.795	-37.598	-34.424	363.615	0.162	-0.143	0.162	0.544	0.162	0.544	0.544	0.086	-0.143	0.62
363.815	-64.575	-66.406	-66.284	-66.528	-66.65	-66.284	-66.04	-39.917	-37.72	-34.546	363.815	0.162	0.01	0.162	0.086	0.162	0.467	0.62	-0.067	-0.296	0.467
364.015	-64.697	-66.406	-66.284	-66.528	-66.65	-66.284	-66.04	-40.039	-37.842	-34.668	364.015	0.162	-0.143	0.086	-0.525	0.162	0.315	0.391	0.01	-0.067	0.315
364.215	-64.697	-66.406	-66.284	-66.528	-66.65	-66.284	-66.04	-40.161	-37.842	-34.79	364.215	0.086	-0.219	-0.143	-0.525	0.238	0.544	0.01	0.315	0.391	0.544
364.415	-64.697	-66.406	-66.284	-66.528	-66.65	-66.284	-66.04	-40.161	-37.964	-34.912	364.415	-0.143	0.238	-0.296	0.162	0.467	0.925	0.01	0.391	0.62	0.925
364.615	-64.697	-66.406	-66.406	-66.528	-66.65	-66.284	-66.04	-40.283	-38.086	-35.034	364.615	-0.219	0.925	-0.143	0.849	0.62	0.925	0.391	0.315	0.544	0.925
364.815	-64.697	-66.406	-66.284	-66.528	-66.65	-66.284	-66.04	-40.405	-38.208	-35.156	364.815	0.162	1.307	0.086	0.925	0.467	0.62	0.772	0.544	0.62	0.544
365.015	-64.697	-66.406	-66.406	-66.65	-66.65	-66.284	-66.04	-40.405	-38.33	-35.278	365.015	0.544	1.307	0.162	0.544	0.238	0.62	1.001	0.925	0.925	0.238
365.215	-64.697	-66.528	-66.284	-66.65	-66.65	-66.284	-66.04	-40.527	-38.452	-35.4	365.215	0.467	1.001	0.162	0.238	0.238	0.925	1.001	0.925	0.925	0.086
365.415	-64.697	-66.406	-66.406	-66.65	-66.528	-66.284	-66.04	-40.649	-38.574	-35.522	365.415	0.238	0.62	0.238	0.162	0.467	0.925	0.849	0.544	0.544	-0.143
365.615	-64.697	-66.406	-66.406	-66.528	-66.528	-66.284	-66.04	-40.771	-38.574	-35.645	365.615	0.162	0.544	0.467	0.162	0.696	0.62	0.696	0.315	0.238	-0.219
365.815	-64.697	-66.406	-66.406	-66.528	-66.528	-66.284	-66.04	-40.894	-38.696	-35.767	365.815	0.162	0.62	0.696	0.162	0.772	0.62	0.467	0.467	0.162	0.162
366.015	-64.697	-66.406	-66.406	-66.528	-66.528	-66.284	-66.04	-40.894	-38.818	-35.889	366.015	0.238	0.544	0.772	0.238	0.772	0.925	0.238	0.62	0.162	0.467
366.215	-64.697	-66.406	-66.284	-66.528	-66.528	-66.162	-66.04	-41.016	-38.94	-36.011	366.215	0.467	0.544	0.772	0.467	0.772	0.925	0.238	0.467	0.162	0.162
366.415	-64.697	-66.406	-66.406	-66.65	-66.528	-66.162	-66.04	-41.138	-38.94	-36.011	366.415	0.696	0.696	0.772	0.62	0.696	0.544	0.467	0.315	0.162	-0.219
366.615	-64.697	-66.406	-66.406	-66.65	-66.528	-66.162	-66.162	-41.26	-39.185	-36.133	366.615	0.772	0.772	0.696	0.467	0.467	0.238	0.544	0.467	0.162	-0.067
366.815	-64.697	-66.406	-66.284	-66.65	-66.65	-66.162	-66.04	-41.26	-39.185	-36.255	366.815	0.696	0.696	0.467	0.238	0.315	0.238	0.162	0.62	0.162	0.391
367.015	-64.819	-66.406	-66.284	-66.65	-66.65	-66.162	-66.04	-41.382	-39.429	-36.377	367.015	0.467	0.467	0.238	0.162	0.467	0.467	-0.143	0.467	0.238	0.62
367.215	-64.697	-66.406	-66.284	-66.528	-66.65	-66.162	-66.04	-41.504	-39.551	-36.499	367.215	0.238	0.238	0.162	0.162	0.62	0.62	0.086	0.238	0.467	0.467
367.415	-64.697	-66.406	-66.406	-66.65	-66.65	-66.162	-66.04	-41.626	-39.551	-36.499	367.415	0.162	0.162	0.162	0.162	0.391	0.467	0.238	0.162	0.62	0.238
367.615	-64.697	-66.406	-66.284	-66.65	-66.65	-66.162	-66.04	-41.748	-39.673	-36.743	367.615	0.162	0.162	0.162	0.162	-0.067	0.238	0.01	0.162	0.467	0.162
367.815	-64.697	-66.406	-66.284	-66.65	-66.65	-66.162	-66.04	-41.748	-39.795	-36.865	367.815	0.162	0.162	0.162	0.162	-0.296	0.162	-0.067	0.162	0.238	0.162
368.015	-64.697	-66.406	-66.284	-66.65	-66.772	-66.162	-66.04	-41.87	-39.917	-36.987	368.015	0.162	0.238	0.162	0.162	-0.143	0.162	0.086	0.086	0.086	0.162
368.215	-64.697	-66.406	-66.284	-66.65	-66.65	-66.162	-66.04	-41.992	-40.039	-36.987	368.215	0.162	0.467	0.162	0.238	0.086	0.162	0.162	-0.143	-0.143	0.162
368.415	-64.819	-66.406	-66.284	-66.65	-66.65	-66.162	-66.04	-41.992	-40.161	-37.109	368.415	0.162	0.62	0.162	0.467	0.086	0.238	0.162	-0.296	-0.219	0.162
368.615	-64.819	-66.406	-66.406	-66.528	-66.772	-66.162	-66.04	-41.992	-40.161	-37.231	368.615	0.162	0.467	0.162	0.62	-0.067	0.544	0.162	-0.143	0.162	0.086
368.815	-64.819	-66.406	-66.406	-66.528	-66.772	-66.162	-66.04	-42.114	-40.283	-37.354	368.815	0.238	0.238	0.162	0.467	0.086	0.925	0.162	0.086	0.544	-0.219
369.015	-64.697	-66.406	-66.406	-66.528	-66.65	-66.162	-65.918	-42.236	-40.405	-37.476	369.015	0.544	0.162	0.162	0.238	0.62	0.925	0.162	0.162	0.467	-0.601
369.215	-64.819	-66.406	-66.406	-66.528	-66.772	-66.162	-65.918	-42.358	-40.527	-37.598	369.215	0.925	0.162	0.162	0.238	0.849	0.544	0.162	0.238	0.238	-0.601
369.415	-64.819	-66.528	-66.406	-66.528	-66.772	-66.162	-65.918	-42.48	-40.527	-37.72	369.415	0.925	0.162	0.238	0.467	0.544	0.315	0.162	0.467	0.162	-0.219
369.615	-64.819	-66.406	-66.406	-66.65	-66.772	-66.162	-66.04	-42.603	-40.649	-37.842	369.615	0.544	0.238	0.467	0.62	0.238	0.467	0.162	0.62	0.162	0.086
369.815	-64.819	-66.406	-66.528	-66.65	-66.772	-66.162	-66.04	-42.603	-40.771	-37.842	369.815	0.315	0.544	0.62	0.467	0.238	0.62	0.162	0.467	0.162	0.162
370.015	-64.819	-66.406	-66.406	-66.528	-66.65	-66.162	-65.918	-42.725	-40.771	-38.086	370.015	0.391	1.001	0.467	0.315	0.544	0.467	0.238	0.238	0.162	0.162
370.215	-64.819	-66.528	-66.406	-66.528	-66.65	-66.162	-66.04	-42.725	-40.894	-38.086	370.215	0.315	1.23	0.238	0.544	0.925	0.238	0.391	0.162	0.162	0.162
370.415	-64.819	-66.528	-66.528	-66.528	-66.65	-66.162	-65.918	-42.847	-40.894	-38.208	370.415	0.01	1.001	0.162	1.001	0.925	0.162	0.315	0.162	0.162	0.162
370.615	-64.819	-66.406	-66.406	-66.528	-66.65	-66.284	-65.918	-42.969	-41.016	-38.33	370.615	-0.067	0.544	0.162	1.23	0.544	0.238	0.086	0.162	0.086	0.162
370.815	-64.819	-66.406	-66.406	-66.528	-66.528	-66.162	-65.918	-43.091	-41.138	-38.452	370.815	0.086	0.315	0.238	0.925	0.238	0.467	0.238	0.162	-0.067	0.086
371.015	-64.819	-66.406	-66.406	-66.528	-66.528	-66.162	-65.918	-43.091	-41.26	-38.452	371.015	0.086	0.467	0.467	0.238	0.162	0.62	0.544	0.162	0.01	-0.143
371.215	-64.819	-66.406	-66.406	-66.528	-66.65	-66.162	-65.918	-43.213	-41.382	-38.574	371.215	-0.143	0.544	0.696	-0.219	0.238	0.467	0.467	0.086	0.238	-0.296
371.415	-64.819	-66.406	-66.284	-66.528	-66.65	-66.162	-66.04	-43.213	-41.382	-38.818	371.415	-0.296	0.162	0.772	-0.067	0.544	0.238	0.238	-0.143	0.01	-0.219
371.615	-64.697	-66.406	-66.284	-66.528	-66.65	-66.04	-65.918	-43.335	-41.504	-38.818	371.615	-0.067	-0.219	0.772	0.315	0.925	0.162	0.162	-0.296	-0.525	-0.219
371.815	-64.819	-66.406	-66.284	-66.65	-66.65	-66.162	-65.918	-43.457	-41.626	-38.818	371.815	0.467	-0.143	0.849	0.315	0.925	0.162	0.162	-0.143	-0.601	-0.296
372.015	-64.819	-66.528	-66.284	-66.65	-66.65	-66.162	-65.918	-43.457	-41.748	-38.94	372.015	0.925	0.086	1.001	0.01	0.544	0.238	0.162	0.01	-0.219	-0.143
372.215	-64.819	-66.406	-66.284	-66.528	-66.65	-66.162	-66.04	-43.701	-41.87	-39.062	372.215	0.925	0.238	0.849	-0.067	0.238	0.391	0.162	-0.219	0.086	0.086
372.415	-64.819	-66.406	-66.284	-66.528	-66.65	-66.04	-66.04	-43.701	-41.87	-39.185	372.415	0.544	0.544	0.315	0.086	0.162	0.315	0.162	-0.601	0.162	0.086
372.615	-64.819	-66.406	-66.284	-66.65	-66.65	-66.04	-66.04	-43.823	-42.114	-39.307	372.615	0.238	0.925	0.162	0.086	0.086	0.01	0.162	-0.601	0.162	-0.143
372.815	-64.819	-66.406	-66.406	-66.65	-66.65	-66.04	-65.918	-43.823	-42.236	-39.429	372.815	0.086	0.925	0.62	-0.143	-0.143	-0.067	0.086	-0.219	0.086	-0.296
373.015	-64.819	-66.406	-66.284	-66.528	-66.65	-66.04	-65.918	-43.945	-42.236	-39.551	373.015	-0.143	0.544	0.849	-0.296	-0.296	0.086	-0.219	0.01	-0.219	-0.219
373.215	-64.819	-66.406	-66.284	-66.528	-66.65	-66.04	-65.918	-44.067	-42.358	-39.673	373.215	-0.296	0.315	0.544	-0.143	-0.067	0.086	-0.601	-0.219	-0.601	-0.296
373.415	-64.819	-66.406	-66.406	-66.65	-66.65	-66.04	-65.918	-44.189	-42.48	-39.795	373.415	-0.219	0.467	0.162	0.086	0.391	-0.143	-0.601	-0.601	-0.677	-0.677
373.615	-64.819	-66.528	-66.406	-66.528	-66.772	-66.04	-65.918	-44.189	-42.603	-39.795	373.615	-0.219	0.62	-0.219	0.086	0.62	-0.296	-0.219	-0.601	-0.525	-0.982
373.815	-64.697	-66.406	-66.406	-66.528	-66.65	-66.04	-65.918	-44.312	-42.725	-39.917	373.815	-0.296	0.467	-0.601	-0.219	0.391	-0.143	0.086	-0.296	-0.448	-1.059
374.015	-64.697	-66.406	-66.284	-66.528	-66.65	-66.04	-65.918	-44.312	-42.847	-40.039	374.015	-0.143	0.238	-0.601	-0.601	-0.067	0.01	0.162	-0.219	-0.448	-0.982
374.215	-64.819	-66.406	-66.284	-66.528	-66.772	-66.04	-66.04	-44.434	-42.969	-40.161	374.215	0.086	0.162	-0.219	-0.601	-0.296	-0.143	0.162	-0.296	-0.448	-0.753
374.415	-64.819	-66.406	-66.406	-66.528	-66.772	-66.04	-65.918	-44.556	-42.969	-40.405	374.415	0.162	0.086	0.086	-0.296	-0.219	-0.296	0.162	-0.143	-0.448	-0.525
374.615	-64.819	-66.406	-66.406	-66.528	-66.772	-66.04	-66.04	-44.678	-43.091	-40.405	374.615	0.162	-0.143	0.162	-0.219	-0.296	-0.143	0.162	0.086	-0.448	-0.372
374.815	-64.819	-66.406	-66.406	-66.528	-66.772	-66.162	-66.04	-44.8	-43.213	-40.527	374.815	0.086	-0.296	0.162	-0.296	-0.601	0.086	0.086	0.086	-0.525	-0.143
375.015	-64.819	-66.406	-66.406	-66.528	-66.772	-66.162	-66.04	-44.922	-43.213	-40.649	375.015	-0.143	-0.143	0.162	-0.143	-0.525	0.162	-0.143	-0.219	-0.753	0.086
375.215	-64.819	-66.406	-66.406	-66.528	-66.65	-66.04	-66.04	-44.922	-43.335	-40.771	375.215	-0.372	0.086	0.162	0.086	0.086	0.086	-0.372	-0.677	-0.906	0.086
375.415	-64.819	-66.406	-66.406	-66.528	-66.65	-66.04	-66.04	-44.922	-43.457	-40.894	375.415	-0.525	0.086	0.086	0.162	0.467	-0.143	-0.448	-0.906	-0.677	-0.143
375.615	-64.819	-66.406	-66.406	-66.528	-66.772	-66.162	-65.918	-45.166	-43.579	-41.016	375.615	-0.677	-0.219	-0.143	0.086	0.162	-0.296	-0.372	-0.753	-0.219	-0.296
375.815	-64.819	-66.406	-66.406	-66.65	-66.65	-66.04	-65.918	-45.166	-43.579	-41.016	375.815	-0.601	-0.601	-0.296	-0.143	-0.219	-0.143	-0.143	-0.601	0.01	-0.219
376.015	-64.819	-66.406	-66.406	-66.65	-66.65	-66.04	-65.918	-45.288	-43.701	-41.138	376.015	-0.219	-0.601	-0.219	-0.296	-0.143	0.086	0.086	-0.753	-0.143	-0.296
376.215	-64.819	-66.406	-66.406	-66.528	-66.65	-66.04	-65.918	-45.41	-43.823	-41.26	376.215	0.086	-0.219	-0.296	-0.143	0.01	0.162	0.162	-0.906	-0.296	-0.601
376.415	-64.819	-66.406	-66.284	-66.528	-66.65	-66.04	-65.918	-45.41	-43.945	-41.26	376.415	0.086	0.01	-0.677	0.086	-0.143	0.162	0.162	-0.677	-0.143	-0.525
376.615	-64.819	-66.406	-66.284	-66.528	-66.65	-66.04	-65.918	-45.532	-44.067	-41.382	376.615	-0.219	-0.143	-0.906	0.162	-0.296	0.162	0.162	-0.296	0.01	0.086
376.815	-64.941	-66.406	-66.406	-66.528	-66.65	-66.04	-65.918	-45.654	-44.067	-41.504	376.815	-0.601	-0.219	-0.601	0.162	-0.143	0.162	0.162	-0.219	-0.143	0.544
377.015	-64.819	-66.406	-66.284	-66.528	-66.65	-66.04	-65.918	-45.776	-44.189	-41.626	377.015	-0.601	0.162	0.086	0.162	0.01	0.086	0.162	-0.296	-0.296	0.391
377.215	-64.941	-66.406	-66.284	-66.528	-66.65	-66.04	-65.918	-45.776	-44.189	-41.748	377.215	-0.219	0.467	0.544	0.086	-0.143	-0.143	0.162	-0.219	-0.219	-0.067
377.415	-64.819	-66.406	-66.284	-66.65	-66.65	-66.04	-65.918	-45.898	-44.312	-41.748	377.415	0.01	0.086	0.391	-0.143	-0.219	-0.296	0.162	-0.219	-0.296	-0.296
377.615	-64.819	-66.406	-66.406	-66.528	-66.65	-66.04	-65.918	-46.021	-44.434	-41.87	377.615	-0.143	-0.601	-0.067	-0.219	0.162	-0.143	0.162	-0.372	-0.601	-0.219
377.815	-64.941	-66.406	-66.406	-66.528	-66.65	-66.04	-65.918	-46.021	-44.556	-41.992	377.815	-0.296	-0.906	-0.296	0.162	0.544	0.01	0.162	-0.448	-0.677	-0.143
378.015	-64.941	-66.406	-66.284	-66.528	-66.65	-65.918	-65.918	-46.143	-44.556	-42.114	378.015	-0.143	-0.677	-0.143	0.467	0.467	-0.143	0.162	-0.448	-0.525	0.01
378.215	-64.819	-66.406	-66.284	-66.528	-66.65	-66.04	-65.918	-46.143	-44.678	-42.236	378.215	0.086	-0.219	0.086	0.086	0.238	-0.296	0.162	-0.448	-0.372	0.315
378.415	-64.941	-66.528	-66.406	-66.528	-66.65	-66.04	-65.918	-46.265	-44.8	-42.358	378.415	0.162	0.086	0.162	-0.525	0.162	-0.143	0.162	-0.448	-0.143	0.391
378.615	-64.819	-66.528	-66.284	-66.528	-66.65	-66.04	-65.918	-46.265	-44.922	-42.48	378.615	0.238	0.162	0.162	-0.601	0.162	0.01	0.238	-0.448	0.086	0.238
378.815	-64.941	-66.406	-66.406	-66.528	-66.65	-65.918	-65.918	-46.387	-44.922	-42.603	378.815	0.467	0.162	0.086	-0.219	0.086	-0.143	0.467	-0.372	0.086	0.162
379.015	-64.819	-66.406	-66.284	-66.528	-66.65	-65.918	-65.918	-46.509	-45.044	-42.603	379.015	0.544	0.162	-0.219	0.01	-0.219	-0.296	0.544	-0.219	-0.219	0.162
379.215	-64.819	-66.406	-66.284	-66.528	-66.65	-65.918	-66.04	-46.509	-45.166	-42.725	379.215	0.162	0.162	-0.677	-0.143	-0.601	-0.143	0.086	-0.296	-0.677	0.086
379.415	-64.819	-66.406	-66.284	-66.528	-66.65	-65.918	-65.918	-46.631	-45.288	-42.847	379.415	-0.219	0.162	-0.906	-0.296	-0.601	0.086	-0.525	-0.677	-0.906	-0.219
379.615	-64.819	-66.406	-66.284	-66.528	-66.65	-65.918	-65.918	-46.631	-45.41	-42.969	379.615	-0.143	0.162	-0.677	-0.143	-0.296	0.086	-0.601	-0.906	-0.677	-0.677
379.815	-64.819	-66.406	-66.284	-66.528	-66.65	-65.918	-65.918	-46.753	-45.532	-43.213	379.815	0.086	0.162	-0.219	0.086	-0.219	-0.143	-0.219	-0.677	-0.219	-0.906
380.015	-64.941	-66.528	-66.406	-66.528	-66.65	-65.918	-66.04	-46.875	-45.654	-43.213	380.015	0.086	0.086	0.086	0.162	-0.296	-0.296	0.086	-0.219	0.01	-0.677
380.215	-64.819	-66.406	-66.284	-66.528	-66.65	-66.04	-65.918	-46.875	-45.654	-43.335	380.215	-0.143	-0.143	0.162	0.162	-0.143	-0.143	0.162	0.086	-0.219	-0.219
380.415	-64.819	-66.406	-66.284	-66.528	-66.65	-65.918	-66.04	-46.997	-45.776	-43.335	380.415	-0.372	-0.372	0.162	0.086	0.086	0.086	0.086	0.162	-0.601	0.086
380.615	-64.819	-66.406	-66.284	-66.528	-66.65	-65.918	-66.04	-47.241	-45.776	-43.457	380.615	-0.525	-0.448	0.086	-0.143	0.162	0.162	-0.143	0.162	-0.601	0.162
380.815	-64.941	-66.406	-66.406	-66.528	-66.65	-65.918	-65.918	-47.241	-45.898	-43.579	380.815	-0.677	-0.448	-0.219	-0.296	0.162	0.162	-0.372	0.162	-0.219	0.162
381.015	-64.941	-66.406	-66.406	-66.528	-66.65	-65.918	-66.04	-47.363	-46.021	-43.701	381.015	-0.677	-0.525	-0.601	-0.143	0.162	0.162	-0.448	0.086	0.086	0.162
381.215	-64.941	-66.406	-66.406	-66.528	-66.65	-65.918	-65.918	-47.485	-46.021	-43.823	381.215	-0.525	-0.677	-0.601	0.086	0.162	0.086	-0.372	-0.143	0.162	0.086
381.415	-64.941	-66.406	-66.284	-66.528	-66.65	-65.918	-66.04	-47.485	-46.143	-43.823	381.415	-0.372	-0.601	-0.296	0.086	0.086	-0.143	-0.143	-0.296	0.162	-0.219
381.615	-64.819	-66.406	-66.284	-66.528	-66.528	-65.918	-66.04	-47.607	-46.265	-44.067	381.615	-0.143	-0.296	-0.219	-0.143	-0.219	-0.296	0.086	-0.143	0.162	-0.601
381.815	-64.819	-66.406	-66.284	-66.528	-66.65	-65.918	-65.918	-47.607	-46.387	-44.067	381.815	0.086	-0.296	-0.296	-0.296	-0.601	-0.143	0.086	0.086	0.162	-0.601
382.015	-64.941	-66.406	-66.406	-66.528	-66.65	-65.918	-66.04	-47.729	-46.387	-44.189	382.015	0.162	-0.601	-0.143	-0.219	-0.601	0.162	-0.143	0.162	0.162	-0.219
382.215	-64.941	-66.284	-66.284	-66.406	-66.65	-65.796	-65.918	-47.852	-46.509	-44.312	382.215	0.162	-0.601	0.086	-0.219	-0.219	0.467	-0.296	0.162	0.162	0.01
382.415	-64.941	-66.406	-66.284	-66.528	-66.528	-65.918	-65.918	-47.852	-46.631	-44.434	382.415	0.162	-0.296	0.162	-0.296	0.086	0.62	-0.219	0.238	0.162	-0.067
382.615	-64.941	-66.406	-66.284	-66.528	-66.528	-65.918	-65.918	-47.974	-46.631	-44.434	382.615	0.162	-0.296	0.086	-0.143	0.162	0.467	-0.219	0.467	0.162	0.086
382.815	-64.819	-66.406	-66.406	-66.406	-66.528	-65.918	-66.04	-48.096	-46.753	-44.556	382.815	0.162	-0.601	-0.143	0.086	0.238	0.315	-0.296	0.62	0.162	0.62
383.015	-64.941	-66.406	-66.284	-66.406	-66.528	-65.918	-65.918	-48.218	-46.875	-44.678	383.015	0.162	-0.601	-0.296	0.162	0.467	0.467	-0.143	0.467	0.162	0.849
383.215	-64.819	-66.406	-66.406	-66.406	-66.528	-65.918	-65.918	-48.218	-46.875	-44.678	383.215	0.162	-0.219	-0.143	0.086	0.62	0.62	0.086	0.238	0.238	0.544
383.415	-64.941	-66.406	-66.284	-66.528	-66.528	-65.918	-65.796	-48.34	-47.119	-44.678	383.415	0.162	0.086	0.086	-0.143	0.467	0.467	0.162	0.238	0.467	0.238
383.615	-64.941	-66.406	-66.284	-66.406	-66.528	-65.918	-65.796	-48.462	-47.119	-44.922	383.615	0.162	0.162	0.162	-0.219	0.238	0.238	0.162	0.391	0.544	0.238
383.815	-64.941	-66.406	-66.406	-66.406	-66.528	-65.918	-65.918	-48.462	-47.241	-44.922	383.815	0.162	0.162	0.162	0.238	0.162	0.162	0.162	0.315	0.162	0.467
384.015	-64.941	-66.406	-66.284	-66.528	-66.528	-65.796	-65.918	-48.462	-47.363	-44.922	384.015	0.162	0.162	0.162	0.849	0.162	0.162	0.238	0.01	-0.219	0.696
384.215	-64.941	-66.406	-66.284	-66.406	-66.528	-65.918	-65.918	-48.584	-47.363	-45.166	384.215	0.086	0.162	0.162	0.849	0.162	0.162	0.467	-0.067	-0.067	0.772
384.415	-64.941	-66.406	-66.284	-66.406	-66.528	-65.918	-65.918	-48.706	-47.485	-45.288	384.415	-0.219	0.086	0.162	0.315	0.162	0.238	0.62	0.086	0.467	0.696
384.615	-64.941	-66.406	-66.284	-66.528	-66.528	-65.918	-65.918	-48.828	-47.607	-45.288	384.615	-0.601	-0.067	0.162	0.086	0.162	0.467	0.467	0.238	0.925	0.391
384.815	-64.819	-66.406	-66.162	-66.528	-66.528	-65.918	-65.918	-48.828	-47.729	-45.41	384.815	-0.601	0.086	0.238	0.315	0.162	0.62	0.238	0.544	0.925	-0.067
385.015	-64.819	-66.406	-66.284	-66.406	-66.528	-65.918	-65.918	-48.95	-47.729	-45.41	385.015	-0.219	0.62	0.467	0.391	0.162	0.467	0.238	0.925	0.544	-0.296
385.215	-64.819	-66.406	-66.284	-66.406	-66.528	-65.918	-65.918	-48.95	-47.852	-45.532	385.215	0.086	0.849	0.62	0.315	0.238	0.315	0.544	0.925	0.238	-0.067
385.415	-64.819	-66.406	-66.284	-66.406	-66.528	-65.796	-65.918	-49.072	-47.974	-45.654	385.415	0.162	0.544	0.467	0.544	0.544	0.544	0.925	0.544	0.162	0.391
385.615	-64.819	-66.406	-66.162	-66.406	-66.528	-65.796	-65.918	-49.194	-48.096	-45.776	385.615	0.238	0.315	0.315	0.925	1.001	0.925	0.925	0.238	0.162	0.62
385.815	-64.941	-66.406	-66.284	-66.406	-66.528	-65.796	-65.918	-49.194	-48.096	-45.898	385.815	0.467	0.467	0.467	0.925	1.23	0.925	0.62	0.162	0.162	0.467
386.015	-64.819	-66.406	-66.162	-66.406	-66.406	-65.918	-65.918	-49.316	-48.218	-46.021	386.015	0.696	0.62	0.62	0.544	1.078	0.544	0.544	0.162	0.162	0.238
386.215	-64.819	-66.406	-66.162	-66.528	-66.528	-65.796	-65.918	-49.438	-48.34	-46.143	386.215	0.772	0.467	0.544	0.315	0.925	0.238	0.62	0.162	0.162	0.086
386.415	-64.941	-66.406	-66.284	-66.406	-66.528	-65.796	-65.796	-49.438	-48.34	-46.143	386.415	0.696	0.315	0.544	0.467	1.001	0.162	0.467	0.162	0.162	-0.219
386.615	-64.941	-66.284	-66.284	-66.406	-66.528	-65.796	-65.918	-49.561	-48.462	-46.265	386.615	0.544	0.544	0.62	0.62	0.925	0.162	0.238	0.162	0.162	-0.601
386.815	-64.819	-66.406	-66.284	-66.528	-66.528	-65.918	-65.918	-49.561	-48.584	-46.387	386.815	0.467	0.925	0.467	0.544	0.544	0.238	0.162	0.162	0.162	-0.525
387.015	-64.941	-66.406	-66.284	-66.528	-66.406	-65.918	-65.918	-49.683	-48.706	-46.509	387.015	0.315	0.925	0.238	0.544	0.238	0.467	0.162	0.162	0.162	0.086
387.215	-64.941	-66.406	-66.284	-66.406	-66.528	-65.918	-65.918	-49.805	-48.706	-46.631	387.215	-0.067	0.62	0.162	0.696	0.162	0.696	0.162	0.162	0.162	0.467
387.415	-64.941	-66.406	-66.284	-66.406	-66.528	-65.918	-65.918	-49.805	-48.828	-46.631	387.415	-0.372	0.544	0.238	0.772	0.162	0.772	0.162	0.162	0.162	0.162
387.616	-64.941	-66.284	-66.284	-66.406	-66.528	-65.918	-65.918	-49.927	-48.95	-46.753	387.616	-0.372	0.696	0.467	0.696	0.162	0.696	0.162	0.238	0.162	-0.219
387.816	-64.941	-66.284	-66.284	-66.406	-66.528	-65.918	-65.918	-50.049	-48.95	-46.875	387.816	-0.067	0.772	0.62	0.391	0.238	0.467	0.238	0.467	0.162	-0.143
388.016	-64.941	-66.284	-66.284	-66.528	-66.528	-65.796	-65.918	-50.171	-49.072	-46.875	388.016	0.391	0.696	0.467	-0.067	0.467	0.238	0.467	0.696	0.162	0.01
388.216	-64.941	-66.284	-66.284	-66.406	-66.528	-65.796	-65.918	-50.171	-49.194	-47.119	388.216	0.62	0.467	0.238	-0.296	0.62	0.086	0.62	0.772	0.238	-0.143
388.416	-64.941	-66.284	-66.284	-66.406	-66.528	-65.796	-65.918	-50.293	-49.316	-47.119	388.416	0.467	0.238	0.086	-0.143	0.391	-0.143	0.544	0.696	0.467	-0.296
388.616	-64.941	-66.406	-66.284	-66.406	-66.528	-65.796	-65.918	-50.293	-49.316	-47.119	388.616	0.238	0.162	-0.143	0.086	-0.067	-0.296	0.544	0.467	0.62	-0.143
388.816	-64.941	-66.406	-66.284	-66.406	-66.528	-65.796	-65.918	-50.415	-49.438	-47.363	388.816	0.162	0.162	-0.296	0.162	-0.296	-0.067	0.62	0.162	0.467	0.086
389.016	-64.941	-66.406	-66.284	-66.406	-66.528	-65.796	-65.918	-50.415	-49.438	-47.363	389.016	0.162	0.162	-0.143	0.238	-0.143	0.391	0.467	-0.143	0.238	0.162
389.216	-64.941	-66.406	-66.284	-66.528	-66.528	-65.796	-65.918	-50.537	-49.561	-47.485	389.216	0.238	0.238	0.086	0.467	0.086	0.62	0.315	-0.296	0.086	0.162
389.416	-64.941	-66.406	-66.284	-66.406	-66.528	-65.674	-65.918	-50.659	-49.683	-47.607	389.416	0.467	0.467	0.162	0.62	0.162	0.467	0.467	-0.067	-0.143	0.238
389.616	-64.941	-66.406	-66.284	-66.528	-66.528	-65.796	-65.918	-50.659	-49.683	-47.607	389.616	0.62	0.62	0.162	0.544	0.162	0.238	0.62	0.391	-0.372	0.467
389.816	-65.063	-66.406	-66.284	-66.528	-66.528	-65.796	-65.918	-50.903	-49.805	-47.729	389.816	0.467	0.467	0.162	0.544	0.162	0.162	0.467	0.62	-0.448	0.62
390.016	-64.941	-66.406	-66.284	-66.528	-66.528	-65.796	-65.918	-50.903	-49.927	-47.852	390.016	0.238	0.315	0.162	0.696	0.238	0.162	0.238	0.467	-0.296	0.467
390.216	-65.063	-66.284	-66.284	-66.406	-66.528	-65.674	-65.918	-50.903	-49.927	-47.852	390.216	0.162	0.467	0.162	0.772	0.467	0.162	0.162	0.238	0.162	0.238
390.416	-65.063	-66.406	-66.284	-66.406	-66.528	-65.796	-65.918	-51.025	-50.049	-47.974	390.416	0.162	0.696	0.162	0.696	0.62	0.162	0.162	0.162	0.544	0.162
390.616	-64.941	-66.406	-66.284	-66.528	-66.528	-65.796	-65.918	-51.025	-50.049	-48.096	390.616	0.162	0.772	0.238	0.467	0.467	0.162	0.162	0.162	0.467	0.162
390.816	-65.063	-66.406	-66.284	-66.406	-66.528	-65.796	-65.918	-51.147	-50.171	-48.096	390.816	0.162	0.696	0.467	0.238	0.238	0.162	0.238	0.162	0.238	0.162
391.016	-65.063	-66.406	-66.284	-66.528	-66.406	-65.796	-65.918	-51.27	-50.293	-48.218	391.016	0.238	0.467	0.62	0.162	0.162	0.162	0.544	0.238	0.162	0.162
391.216	-65.063	-66.406	-66.284	-66.528	-66.528	-65.796	-65.918	-51.27	-50.537	-48.34	391.216	0.467	0.238	0.467	0.162	0.162	0.162	1.001	0.467	0.162	0.162
391.416	-64.941	-66.406	-66.284	-66.406	-66.528	-65.796	-65.918	-51.392	-50.537	-48.462	391.416	0.62	0.162	0.238	0.238	0.162	0.162	1.23	0.62	0.162	0.162
391.616	-64.941	-66.406	-66.284	-66.406	-66.528	-65.796	-65.918	-51.514	-50.659	-48.584	391.616	0.467	0.162	0.238	0.544	0.238	0.238	1.001	0.391	0.162	0.086
391.816	-64.941	-66.406	-66.284	-66.406	-66.528	-65.796	-65.918	-51.514	-50.659	-48.584	391.816	0.315	0.162	0.467	0.925	0.467	0.467	0.544	-0.067	0.086	-0.219
392.016	-64.941	-66.406	-66.284	-66.528	-66.528	-65.796	-65.918	-51.636	-50.781	-48.706	392.016	0.467	0.162	0.62	0.925	0.62	0.62	0.238	-0.219	-0.143	-0.601
392.216	-64.941	-66.406	-66.284	-66.528	-66.528	-65.796	-66.04	-51.636	-50.781	-48.706	392.216	0.62	0.238	0.467	0.544	0.467	0.467	0.162	0.086	-0.296	-0.601
392.416	-64.941	-66.406	-66.162	-66.528	-66.406	-65.796	-65.918	-51.758	-50.903	-48.828	392.416	0.544	0.467	0.315	0.238	0.238	0.238	0.162	0.238	-0.219	-0.219
392.616	-64.941	-66.406	-66.162	-66.406	-66.528	-65.796	-66.04	-51.758	-51.025	-48.95	392.616	0.544	0.62	0.467	0.162	0.162	0.162	0.162	-0.067	-0.219	0.01
392.816	-64.941	-66.406	-66.284	-66.406	-66.528	-65.796	-65.918	-51.88	-51.147	-49.072	392.816	0.696	0.544	0.62	0.162	0.162	0.162	0.162	-0.372	-0.372	-0.143
393.016	-64.941	-66.284	-66.284	-66.406	-66.406	-65.796	-65.918	-52.002	-51.147	-49.194	393.016	0.772	0.544	0.467	0.086	0.086	0.162	0.162	-0.372	-0.448	-0.219
393.216	-64.941	-66.406	-66.162	-66.162	-66.528	-65.796	-65.918	-52.002	-51.27	-49.194	393.216	0.62	0.62	0.315	-0.219	-0.143	0.238	0.162	-0.219	-0.448	0.086
393.416	-64.941	-66.406	-66.284	-65.918	-66.406	-65.796	-65.918	-52.124	-51.27	-49.316	393.416	0.162	0.467	0.467	-0.601	-0.296	0.467	0.162	-0.219	-0.448	0.238
393.616	-64.941	-66.406	-66.162	-65.308	-66.528	-65.796	-66.04	-52.124	-51.392	-49.438	393.616	-0.143	0.238	0.544	-0.601	-0.143	0.544	0.162	-0.372	-0.448	-0.067
393.816	-64.941	-66.406	-65.918	-64.697	-66.528	-65.796	-66.04	-52.246	-51.514	-49.561	393.816	0.162	0.162	0.162	-0.219	0.086	0.086	0.162	-0.448	-0.448	-0.448
394.016	-65.063	-66.406	-65.43	-63.965	-66.528	-65.674	-66.04	-52.246	-51.514	-49.561	394.016	0.467	0.162	-0.219	0.086	0.162	-0.525	0.162	-0.372	-0.372	-0.677
394.216	-65.063	-66.162	-64.941	-63.354	-66.406	-65.796	-66.04	-52.368	-51.514	-49.683	394.216	0.086	0.162	-0.143	0.162	0.162	-0.601	0.162	-0.219	-0.219	-0.677
394.416	-65.063	-65.796	-64.331	-62.5	-66.528	-65.796	-66.04	-52.49	-51.758	-49.805	394.416	-0.525	0.162	0.01	0.162	0.162	-0.219	0.162	-0.296	-0.219	-0.525
394.616	-65.063	-65.308	-63.599	-61.646	-66.528	-65.796	-66.04	-52.49	-51.758	-49.805	394.616	-0.601	0.162	-0.219	0.162	0.162	0.086	0.086	-0.677	-0.372	-0.372
394.816	-65.063	-64.819	-62.866	-60.791	-66.528	-65.796	-66.04	-52.612	-51.88	-49.927	394.816	-0.296	0.086	-0.677	0.162	0.086	0.162	-0.143	-0.982	-0.448	-0.143
395.016	-64.941	-64.087	-61.89	-59.814	-66.528	-65.796	-66.04	-52.734	-51.88	-49.927	395.016	-0.219	-0.219	-0.906	0.086	-0.143	0.162	-0.296	-0.982	-0.448	0.086
395.216	-64.941	-63.232	-61.157	-58.96	-66.406	-65.796	-66.04	-52.734	-52.002	-50.049	395.216	-0.296	-0.601	-0.677	-0.143	-0.219	0.086	-0.143	-0.677	-0.525	0.086
395.416	-65.063	-62.378	-60.181	-57.983	-66.528	-65.674	-65.918	-52.856	-52.124	-50.171	395.416	-0.143	-0.601	-0.219	-0.372	0.162	-0.219	0.086	-0.219	-0.677	-0.219
395.616	-65.063	-61.523	-59.326	-57.007	-66.528	-65.674	-65.918	-52.856	-52.124	-50.171	395.616	0.086	-0.219	0.086	-0.525	0.467	-0.601	0.162	0.01	-0.677	-0.601
395.816	-65.063	-60.547	-58.228	-56.03	-66.406	-65.674	-66.04	-52.979	-52.246	-50.293	395.816	0.162	0.086	0.086	-0.753	0.086	-0.601	0.162	-0.219	-0.525	-0.677
396.016	-65.063	-59.692	-57.373	-54.932	-66.528	-65.796	-66.04	-52.979	-52.246	-50.415	396.016	0.086	0.162	-0.143	-0.982	-0.448	-0.219	0.162	-0.677	-0.448	-0.601
396.216	-65.063	-58.716	-56.396	-54.077	-66.528	-65.674	-65.918	-53.101	-52.368	-50.415	396.216	-0.143	0.162	-0.372	-0.982	-0.296	0.01	0.162	-0.982	-0.448	-0.753
396.416	-65.063	-57.617	-55.298	-52.979	-66.528	-65.674	-65.918	-53.101	-52.49	-50.537	396.416	-0.372	0.162	-0.525	-0.753	0.238	-0.143	0.086	-1.059	-0.372	-0.906
396.616	-65.063	-56.641	-54.321	-52.002	-66.528	-65.674	-65.918	-53.223	-52.612	-50.659	396.616	-0.525	0.162	-0.753	-0.601	0.315	-0.296	-0.143	-0.982	-0.143	-0.677
396.816	-65.063	-55.542	-53.345	-51.025	-66.528	-65.796	-65.918	-53.223	-52.612	-50.659	396.816	-0.677	0.086	-0.906	-0.753	-0.067	-0.143	-0.372	-0.677	0.01	-0.296
397.016	-65.063	-54.565	-52.246	-49.927	-66.528	-65.796	-65.918	-53.345	-52.734	-50.781	397.016	-0.601	-0.143	-0.677	-0.906	-0.296	0.086	-0.448	-0.296	-0.143	-0.219
397.216	-65.063	-53.467	-51.27	-48.706	-66.528	-65.796	-65.918	-53.345	-52.856	-50.781	397.216	-0.219	-0.296	-0.219	-0.753	-0.219	0.086	-0.372	-0.219	-0.296	-0.372
397.416	-65.063	-52.49	-50.293	-47.607	-66.528	-65.674	-65.918	-53.467	-52.979	-51.025	397.416	0.01	-0.143	0.01	-0.601	-0.296	-0.143	-0.219	-0.372	-0.067	-0.448
397.616	-65.063	-51.27	-49.194	-46.509	-66.528	-65.796	-65.918	-53.467	-52.979	-51.025	397.616	-0.219	0.086	-0.143	-0.677	-0.601	-0.296	-0.219	-0.448	0.315	-0.372
397.816	-65.063	-50.293	-48.096	-45.288	-66.528	-65.796	-66.04	-53.589	-52.979	-51.147	397.816	-0.601	0.162	-0.296	-0.677	-0.677	-0.143	-0.296	-0.372	0.315	-0.143
398.016	-65.063	-49.072	-46.997	-43.945	-66.528	-65.796	-65.918	-53.589	-53.101	-51.147	398.016	-0.525	0.162	-0.219	-0.525	-0.525	0.086	-0.143	-0.219	0.01	-0.067
398.216	-65.063	-47.974	-45.776	-42.236	-66.406	-65.796	-65.918	-53.711	-53.223	-51.27	398.216	0.086	0.086	-0.219	-0.448	-0.448	0.162	0.086	-0.219	-0.067	-0.448
398.416	-64.941	-46.631	-44.434	-40.405	-66.406	-65.796	-66.04	-53.711	-53.223	-51.27	398.416	0.467	-0.219	-0.296	-0.448	-0.525	0.162	0.086	-0.296	0.086	-0.753
398.616	-64.941	-45.41	-42.969	-37.72	-66.406	-65.796	-65.918	-53.711	-53.345	-51.392	398.616	0.086	-0.601	-0.143	-0.525	-0.601	0.162	-0.219	-0.143	0.086	-0.448
398.816	-64.941	-43.945	-41.26	-33.325	-66.406	-65.796	-65.918	-53.833	-53.345	-51.392	398.816	-0.525	-0.601	0.01	-0.753	-0.372	0.162	-0.601	0.086	-0.219	0.01
399.016	-65.063	-42.48	-39.062	-20.752	-66.406	-65.796	-65.918	-53.955	-53.467	-51.514	399.016	-0.677	-0.219	-0.143	-0.906	-0.067	0.238	-0.601	0.162	-0.601	0.162
399.216	-65.063	-40.405	-35.645	17.09	-66.406	-65.796	-65.918	-53.955	-53.589	-51.636	399.216	-0.601	0.086	-0.372	-0.83	-0.143	0.467	-0.296	0.086	-0.677	0.162
399.416	-64.941	-37.842	-28.687	38.33	-66.406	-65.796	-65.918	-54.077	-53.589	-51.758	399.416	-0.677	0.086	-0.525	-0.83	-0.372	0.62	-0.219	-0.219	-0.525	0.086
399.616	-65.063	-33.325	-2.441	43.091	-66.406	-65.796	-65.918	-54.077	-53.711	-51.758	399.616	-0.601	-0.143	-0.753	-0.982	-0.372	0.467	-0.296	-0.601	-0.448	-0.219
399.816	-64.941	-20.63	31.738	43.701	-66.406	-65.796	-66.04	-54.199	-53.711	-51.88	399.816	-0.219	-0.296	-0.906	-1.059	-0.143	0.162	-0.143	-0.601	-0.448	-0.601
[truncated: 23,001 more rows]
