# Supplementary material for: Self-restoration of cardiac excitation rhythm by anti-arrhythmic ion channel gating
Source: eLife. 2020 Jun 8;9:e55921. doi: 10.7554/eLife.55921 (PMC7316504; doi:10.7554/eLife.55921)
Supplement: Figure 5—source data 2. — The data structure is similar to the one from the previous raw data file. [file elife-55921-fig5-data2.csv]

Time	Trace1	Trace2	Trace3	Trace4	Trace5	Trace6	Trace7	Trace8	Time2.1	Trace1.1	Trace2.1	Trace3.1	Trace4.1	Trace5.1	Trace6.1	Trace7.1	Trace8.1
0.2	-63.965	-66.04	-66.772	-66.162	-66.528	-66.65	-66.406	-46.875	0.2	0.323	1.162	1.467	0.857	1.544	1.238	0.399	0.857
0.4	-63.843	-65.918	-66.772	-66.162	-66.528	-66.772	-66.406	-46.997	0.4	0.781	1.162	1.162	0.857	1.544	1.391	0.781	0.323
0.6	-63.843	-66.04	-66.65	-66.04	-66.528	-66.65	-66.406	-47.119	0.6	0.094	0.628	1.238	0.933	1.467	0.628	0.552	0.933
0.8	-63.843	-66.04	-66.772	-66.162	-66.528	-66.65	-66.284	-47.241	0.8	0.094	0.704	1.62	1.162	1.772	0.704	0.399	1.086
1	-63.843	-65.918	-66.65	-66.162	-66.528	-66.65	-66.406	-47.241	1	0.323	0.857	1.467	1.086	1.696	0.933	0.399	0.781
1.2	-63.843	-66.04	-66.65	-66.162	-66.406	-66.772	-66.284	-47.363	1.2	0.704	1.162	1.162	0.857	1.544	1.391	0.781	0.323
1.4	-63.843	-65.918	-66.65	-66.04	-66.528	-66.65	-66.284	-47.363	1.4	0.781	1.467	0.857	0.704	1.544	1.62	1.162	0.094
1.6	-63.843	-65.918	-66.65	-66.04	-66.528	-66.65	-66.284	-47.485	1.6	0.628	1.62	0.704	0.857	1.62	1.467	1.467	0.247
1.8	-63.843	-65.918	-66.65	-66.04	-66.528	-66.65	-66.284	-47.607	1.8	0.552	1.315	0.857	1.086	1.467	1.238	1.696	0.399
2	-63.843	-65.918	-66.65	-66.04	-66.528	-66.65	-66.284	-47.729	2	0.552	0.552	1.086	1.162	1.162	1.162	1.772	0.247
2.2	-63.843	-66.04	-66.65	-66.04	-66.528	-66.65	-66.284	-47.852	2.2	0.552	-0.135	1.162	1.086	0.857	1.162	1.696	0.17
2.4	-63.843	-66.04	-66.65	-66.04	-66.528	-66.65	-66.284	-47.729	2.4	0.628	-0.211	1.086	0.857	0.781	1.238	1.467	0.552
2.6	-63.843	-65.918	-66.65	-66.04	-66.528	-66.772	-66.284	-47.852	2.6	0.857	0.247	0.857	0.704	1.162	1.467	1.315	0.857
2.8	-63.843	-65.918	-66.65	-66.04	-66.528	-66.65	-66.284	-47.852	2.8	1.086	0.704	0.704	0.857	1.544	1.696	1.544	0.552
3	-63.843	-65.918	-66.65	-66.04	-66.528	-66.65	-66.284	-48.096	3	1.01	0.781	0.781	1.086	1.544	1.772	1.925	0.17
3.2	-63.721	-65.796	-66.65	-66.04	-66.528	-66.65	-66.284	-48.218	3.2	0.552	0.628	0.781	1.162	1.544	1.696	1.925	0.323
3.4	-63.843	-65.918	-66.65	-66.04	-66.528	-66.65	-66.284	-48.34	3.4	0.247	0.475	0.704	1.162	1.62	1.391	1.62	0.704
3.6	-63.843	-65.918	-66.65	-66.04	-66.528	-66.65	-66.406	-48.34	3.6	0.552	0.247	0.857	1.162	1.391	0.933	1.544	0.704
3.8	-63.843	-65.918	-66.65	-66.04	-66.528	-66.65	-66.406	-48.34	3.8	0.933	0.094	1.086	1.086	0.933	0.781	1.696	0.399
4	-63.843	-65.796	-66.65	-66.04	-66.528	-66.65	-66.406	-48.462	4	0.857	0.323	1.162	0.857	0.704	1.162	1.772	0.399
4.2	-63.843	-65.918	-66.65	-66.04	-66.528	-66.528	-66.406	-48.584	4.2	0.628	0.781	1.162	0.704	0.933	1.544	1.772	0.781
4.4	-63.843	-65.918	-66.65	-66.162	-66.528	-66.528	-66.406	-48.706	4.4	0.552	1.086	1.162	0.781	1.391	1.467	1.772	1.086
4.6	-63.965	-65.918	-66.65	-66.162	-66.528	-66.65	-66.284	-48.706	4.6	0.552	1.162	1.086	0.704	1.62	1.238	1.696	1.162
4.8	-63.843	-65.796	-66.65	-66.04	-66.528	-66.65	-66.284	-48.828	4.8	0.475	1.162	0.857	0.399	1.544	1.162	1.544	1.162
5	-63.843	-65.918	-66.772	-66.04	-66.528	-66.65	-66.406	-48.95	5	0.323	1.086	0.628	0.399	1.544	1.162	1.544	1.086
5.2	-63.965	-65.918	-66.772	-66.04	-66.528	-66.65	-66.406	-48.95	5.2	0.399	0.781	0.628	0.781	1.62	1.162	1.62	0.857
5.4	-63.843	-65.918	-66.772	-66.04	-66.528	-66.65	-66.406	-49.072	5.4	0.781	0.399	0.933	1.086	1.467	1.162	1.467	0.704
5.6	-63.843	-65.918	-66.772	-66.04	-66.528	-66.65	-66.406	-49.072	5.6	1.086	0.399	1.238	1.086	1.238	1.238	1.162	0.933
5.8	-63.843	-65.918	-66.772	-66.04	-66.528	-66.65	-66.406	-49.316	5.8	1.162	0.704	1.086	0.857	1.162	1.467	0.857	1.391
6	-63.843	-65.918	-66.772	-66.04	-66.528	-66.65	-66.406	-49.316	6	1.162	0.704	0.781	0.704	1.162	1.62	0.704	1.62
6.2	-63.965	-65.918	-66.772	-66.04	-66.406	-66.65	-66.284	-49.438	6.2	1.162	0.399	0.857	0.781	1.162	1.544	0.857	1.391
6.4	-63.843	-65.918	-66.772	-66.04	-66.528	-66.65	-66.406	-49.438	6.4	1.162	0.323	1.086	0.781	1.162	1.544	1.086	0.857
6.6	-63.965	-65.918	-66.772	-65.918	-66.528	-66.65	-66.406	-49.561	6.6	1.162	0.399	1.086	0.704	1.162	1.62	1.162	0.399
6.8	-63.843	-65.918	-66.772	-65.918	-66.528	-66.65	-66.284	-49.561	6.8	1.162	0.247	0.933	0.781	1.162	1.467	1.162	0.399
7	-63.843	-65.918	-66.772	-65.918	-66.528	-66.65	-66.284	-49.683	7	1.162	0.094	1.086	0.704	1.086	1.238	1.162	0.781
7.2	-63.965	-65.918	-66.65	-65.918	-66.528	-66.65	-66.406	-49.805	7.2	1.086	0.399	1.544	0.323	0.857	1.162	1.238	1.086
7.4	-63.843	-65.918	-66.65	-66.04	-66.528	-66.65	-66.284	-49.927	7.4	0.857	1.086	1.544	0.094	0.628	1.162	1.467	1.162
7.6	-63.843	-65.918	-66.65	-66.04	-66.528	-66.65	-66.284	-50.049	7.6	0.704	1.467	1.086	0.323	0.552	1.162	1.544	1.162
7.8	-63.843	-65.918	-66.65	-66.04	-66.528	-66.65	-66.284	-50.049	7.8	0.857	1.086	0.933	0.781	0.552	1.238	1.162	1.162
8	-63.843	-65.918	-66.65	-65.918	-66.528	-66.65	-66.406	-50.171	8	1.01	0.475	1.086	1.086	0.475	1.467	0.857	1.162
8.2	-63.843	-65.918	-66.65	-66.04	-66.528	-66.65	-66.406	-50.293	8.2	0.857	0.399	1.162	1.162	0.323	1.62	1.162	1.162
8.4	-63.843	-65.918	-66.65	-66.04	-66.528	-66.65	-66.284	-50.293	8.4	0.628	0.704	1.086	1.162	0.399	1.544	1.544	1.162
8.6	-63.843	-65.918	-66.65	-66.04	-66.528	-66.65	-66.284	-50.293	8.6	0.552	0.781	0.857	1.086	0.704	1.544	1.544	1.162
8.8	-63.843	-66.04	-66.65	-66.04	-66.528	-66.65	-66.284	-50.415	8.8	0.628	0.704	0.704	0.781	0.704	1.62	1.62	1.162
9	-63.843	-65.918	-66.65	-66.04	-66.528	-66.65	-66.284	-50.537	9	0.857	0.857	0.857	0.399	0.399	1.467	1.925	1.162
9.2	-63.843	-65.918	-66.65	-66.04	-66.528	-66.65	-66.284	-50.659	9.2	1.086	1.086	1.01	0.475	0.399	1.238	1.925	1.238
9.4	-63.843	-65.918	-66.65	-66.04	-66.528	-66.65	-66.406	-50.659	9.4	1.162	1.162	0.857	1.086	0.704	1.086	1.544	1.467
9.6	-63.843	-65.918	-66.65	-66.04	-66.528	-66.65	-66.284	-50.781	9.6	1.238	1.162	0.704	1.544	0.781	0.857	1.238	1.544
9.8	-63.843	-65.918	-66.65	-66.04	-66.528	-66.65	-66.284	-50.781	9.8	1.467	1.162	0.781	1.467	0.628	0.704	1.162	1.162
10	-63.843	-65.918	-66.772	-66.04	-66.528	-66.65	-66.284	-50.903	10	1.62	1.162	0.781	1.238	0.552	0.857	1.162	0.781
10.2	-63.843	-65.918	-66.772	-66.04	-66.528	-66.65	-66.284	-51.025	10.2	1.467	1.162	0.704	1.162	0.552	1.086	1.162	0.781
10.4	-63.843	-65.918	-66.772	-66.04	-66.528	-66.65	-66.284	-51.025	10.4	1.238	1.162	0.933	1.086	0.475	1.238	1.238	0.781
10.6	-63.721	-65.918	-66.772	-65.918	-66.528	-66.65	-66.284	-51.147	10.6	1.162	1.162	1.315	0.781	0.247	1.467	1.467	0.704
10.8	-63.843	-65.918	-66.772	-65.918	-66.406	-66.65	-66.406	-51.27	10.8	1.238	1.238	1.315	0.399	0.094	1.544	1.62	0.857
11	-63.843	-65.918	-66.772	-66.04	-66.528	-66.65	-66.406	-51.27	11	1.467	1.544	0.933	0.399	0.323	1.086	1.467	1.086
11.2	-63.843	-66.04	-66.772	-65.918	-66.528	-66.65	-66.406	-51.392	11.2	1.62	1.925	0.628	0.781	0.704	0.475	1.238	1.162
11.4	-63.965	-65.918	-66.772	-66.04	-66.528	-66.65	-66.528	-51.514	11.4	1.544	1.925	0.628	1.01	0.781	0.323	1.162	1.162
11.6	-63.843	-65.918	-66.772	-66.04	-66.528	-66.65	-66.406	-51.514	11.6	1.544	1.62	0.857	0.857	0.704	0.475	1.086	1.162
11.8	-63.843	-65.918	-66.65	-66.04	-66.528	-66.65	-66.406	-51.636	11.8	1.62	1.62	1.01	0.704	0.857	0.552	0.857	1.162
12	-63.843	-65.918	-66.65	-65.918	-66.406	-66.65	-66.528	-51.758	12	1.467	1.925	0.857	0.857	1.086	0.475	0.704	1.086
12.2	-63.843	-65.918	-66.772	-65.918	-66.528	-66.65	-66.528	-51.88	12.2	1.238	1.925	0.704	1.01	1.162	0.323	0.857	0.781
12.4	-63.843	-65.918	-66.772	-65.918	-66.528	-66.65	-66.406	-51.88	12.4	1.162	1.62	0.857	0.857	1.162	0.399	1.086	0.399
12.6	-63.965	-65.918	-66.772	-65.918	-66.528	-66.65	-66.406	-51.88	12.6	1.162	1.544	1.086	0.628	1.086	0.704	1.162	0.323
12.8	-63.965	-65.918	-66.772	-65.918	-66.528	-66.65	-66.406	-52.002	12.8	1.162	1.544	1.162	0.552	0.857	0.781	1.086	0.475
13	-63.965	-65.918	-66.772	-65.918	-66.528	-66.65	-66.528	-52.246	13	1.162	1.162	1.238	0.628	0.704	0.628	0.857	0.628
13.2	-63.843	-65.796	-66.65	-66.04	-66.528	-66.65	-66.528	-52.246	13.2	1.162	0.781	1.467	0.781	0.781	0.628	0.704	0.857
13.4	-63.843	-65.796	-66.65	-65.918	-66.528	-66.65	-66.406	-52.246	13.4	1.238	0.933	1.62	0.781	0.781	0.857	0.781	1.086
13.6	-63.965	-65.918	-66.65	-65.918	-66.528	-66.65	-66.528	-52.368	13.6	1.467	1.391	1.467	0.704	0.704	0.933	0.704	1.162
13.801	-63.843	-65.918	-66.65	-65.918	-66.528	-66.65	-66.528	-52.368	13.801	1.62	1.62	1.238	0.857	0.857	0.628	0.247	1.086
14.001	-63.843	-65.918	-66.772	-65.918	-66.528	-66.65	-66.406	-52.49	14.001	1.467	1.467	1.162	1.01	1.086	0.475	-0.287	0.781
14.201	-63.843	-65.918	-66.772	-65.918	-66.528	-66.65	-66.406	-52.612	14.201	1.238	1.238	1.162	0.857	1.162	0.781	-0.44	0.323
14.401	-63.843	-65.918	-66.65	-65.918	-66.528	-66.65	-66.406	-52.612	14.401	1.162	1.162	1.162	0.781	1.086	1.086	-0.059	0.094
14.601	-63.843	-65.796	-66.772	-65.918	-66.528	-66.772	-66.406	-52.734	14.601	1.162	1.162	1.238	1.238	0.857	1.162	0.399	0.247
14.801	-63.843	-65.918	-66.65	-65.918	-66.528	-66.65	-66.406	-52.856	14.801	1.162	1.238	1.467	1.849	0.628	1.162	0.628	0.399
15.001	-63.843	-65.918	-66.65	-65.918	-66.528	-66.65	-66.406	-52.856	15.001	1.162	1.467	1.62	1.849	0.552	1.162	0.857	0.247
15.201	-63.843	-65.918	-66.772	-65.918	-66.528	-66.65	-66.406	-52.979	15.201	1.162	1.62	1.391	1.315	0.552	1.086	1.01	0.094
15.401	-63.843	-65.918	-66.772	-66.04	-66.528	-66.772	-66.406	-52.979	15.401	1.162	1.544	0.933	1.086	0.552	0.857	0.781	0.323
15.601	-63.843	-65.918	-66.65	-65.918	-66.528	-66.65	-66.406	-53.101	15.601	1.162	1.544	0.781	1.315	0.628	0.628	0.399	0.704
15.801	-63.843	-65.918	-66.772	-65.918	-66.528	-66.65	-66.406	-53.101	15.801	1.162	1.62	1.162	1.391	0.781	0.552	0.399	0.781
16.001	-63.843	-65.918	-66.772	-65.918	-66.528	-66.65	-66.406	-53.223	16.001	1.162	1.467	1.544	1.238	0.704	0.628	0.781	0.704
16.201	-63.965	-65.918	-66.772	-66.04	-66.528	-66.65	-66.406	-53.223	16.201	1.238	1.238	1.467	1.238	0.399	0.857	1.086	0.857
16.401	-63.843	-65.918	-66.772	-65.918	-66.528	-66.65	-66.284	-53.345	16.401	1.467	1.162	1.238	1.467	0.399	1.01	1.162	1.086
16.601	-63.843	-65.918	-66.772	-65.918	-66.406	-66.65	-66.406	-53.467	16.601	1.62	1.162	1.162	1.62	0.781	0.857	1.162	1.086
16.801	-63.843	-65.918	-66.65	-65.918	-66.406	-66.65	-66.284	-53.467	16.801	1.467	1.238	1.162	1.467	1.086	0.704	1.162	0.781
17.001	-63.843	-65.918	-66.772	-65.918	-66.406	-66.65	-66.406	-53.589	17.001	1.238	1.467	1.086	1.238	1.238	0.857	1.086	0.399
17.201	-63.843	-65.918	-66.772	-65.918	-66.406	-66.65	-66.406	-53.589	17.201	1.162	1.62	0.857	1.162	1.467	1.01	0.857	0.323
17.401	-63.843	-65.918	-66.772	-65.918	-66.406	-66.65	-66.406	-53.711	17.401	1.162	1.467	0.704	1.162	1.62	0.933	0.704	0.475
17.601	-63.843	-65.918	-66.772	-65.918	-66.406	-66.65	-66.406	-53.833	17.601	1.162	1.315	0.857	1.162	1.391	1.086	0.781	0.552
17.801	-63.965	-65.918	-66.772	-65.918	-66.528	-66.65	-66.406	-53.955	17.801	1.086	1.467	1.086	1.238	1.01	1.62	0.704	0.552
18.001	-63.843	-65.918	-66.772	-65.918	-66.528	-66.65	-66.406	-53.955	18.001	0.857	1.62	1.162	1.467	1.01	1.772	0.399	0.628
18.201	-63.843	-65.918	-66.772	-65.918	-66.528	-66.65	-66.406	-53.955	18.201	0.704	1.467	1.162	1.62	1.391	1.238	0.399	0.781
18.401	-63.965	-65.918	-66.772	-65.918	-66.528	-66.65	-66.406	-54.077	18.401	0.857	1.238	1.162	1.467	1.696	0.781	0.781	0.781
18.601	-63.843	-65.918	-66.772	-65.918	-66.528	-66.65	-66.406	-54.077	18.601	1.086	1.162	1.086	1.238	1.696	0.781	1.086	0.704
18.801	-63.843	-65.918	-66.772	-65.918	-66.528	-66.528	-66.406	-54.199	18.801	1.086	1.086	0.857	1.162	1.467	0.704	1.086	0.857
19.001	-63.965	-65.918	-66.772	-66.04	-66.528	-66.528	-66.406	-54.199	19.001	0.857	0.857	0.704	1.162	1.315	0.323	0.781	1.01
19.201	-63.843	-65.918	-66.772	-66.04	-66.528	-66.528	-66.406	-54.321	19.201	0.704	0.704	0.933	1.162	1.467	0.17	0.399	0.781
19.401	-63.965	-65.796	-66.772	-65.918	-66.528	-66.528	-66.284	-54.321	19.401	0.857	0.857	1.391	1.162	1.544	0.628	0.399	0.399
19.601	-63.965	-65.918	-66.772	-65.918	-66.528	-66.528	-66.406	-54.443	19.601	1.01	1.01	1.544	1.238	1.162	1.238	0.781	0.399
19.801	-63.965	-65.918	-66.772	-66.04	-66.528	-66.528	-66.406	-54.565	19.801	0.857	0.857	1.162	1.467	0.933	1.391	1.01	0.781
20.001	-63.843	-65.796	-66.772	-65.918	-66.528	-66.528	-66.406	-54.565	20.001	0.704	0.704	0.857	1.62	1.544	1.238	0.857	1.01
20.201	-63.965	-65.796	-66.65	-65.918	-66.406	-66.528	-66.406	-54.688	20.201	0.781	0.781	1.162	1.467	2.307	1.162	0.704	0.857
20.401	-63.965	-65.918	-66.772	-65.918	-66.528	-66.65	-66.406	-54.688	20.401	0.781	0.781	1.544	1.162	2.23	1.162	0.781	0.628
20.601	-63.843	-65.918	-66.65	-65.918	-66.528	-66.528	-66.406	-54.81	20.601	0.704	0.628	1.467	0.857	1.62	1.162	0.781	0.552
20.801	-63.843	-65.918	-66.65	-65.918	-66.406	-66.528	-66.406	-54.81	20.801	0.857	0.552	1.315	0.704	1.238	1.086	0.704	0.552
21.001	-63.843	-65.918	-66.772	-65.918	-66.406	-66.65	-66.284	-54.932	21.001	1.086	0.628	1.467	0.857	1.086	0.933	0.857	0.552
21.201	-63.843	-65.918	-66.772	-65.918	-66.406	-66.528	-66.284	-55.054	21.201	1.162	0.857	1.62	1.086	0.781	1.01	1.086	0.628
21.401	-63.843	-65.796	-66.772	-65.796	-66.406	-66.65	-66.406	-55.054	21.401	1.086	1.01	1.391	1.238	0.475	1.391	1.162	0.781
21.601	-63.965	-65.918	-66.772	-65.918	-66.406	-66.65	-66.406	-55.176	21.601	0.857	0.857	0.933	1.467	0.781	1.696	1.162	0.704
21.801	-63.965	-65.918	-66.772	-65.918	-66.406	-66.65	-66.284	-55.176	21.801	0.628	0.704	0.704	1.62	1.544	1.772	1.162	0.323
22.001	-63.965	-65.918	-66.772	-65.918	-66.528	-66.65	-66.284	-55.176	22.001	0.552	0.857	0.781	1.391	1.849	1.849	1.162	0.094
22.201	-63.843	-66.04	-66.772	-65.918	-66.406	-66.65	-66.284	-55.298	22.201	0.628	1.086	0.704	0.933	1.62	2.078	1.162	0.247
22.401	-63.965	-65.918	-66.772	-65.918	-66.528	-66.65	-66.406	-55.298	22.401	0.857	1.086	0.399	0.781	1.544	2.23	1.162	0.475
22.601	-63.965	-66.04	-66.772	-65.918	-66.406	-66.528	-66.284	-55.298	22.601	1.086	0.857	0.323	1.162	1.544	2.001	1.238	0.552
22.801	-63.965	-65.918	-66.772	-65.796	-66.528	-66.528	-66.406	-55.054	22.801	1.086	0.704	0.399	1.544	1.162	1.544	1.467	0.552
23.001	-63.965	-65.918	-66.772	-65.918	-66.406	-66.65	-66.406	-55.054	23.001	0.857	0.857	0.247	1.467	0.781	1.238	1.62	0.628
23.201	-63.965	-65.918	-66.772	-65.918	-66.406	-66.65	-66.406	-54.81	23.201	0.628	1.01	0.094	1.238	0.857	1.238	1.467	0.857
23.401	-63.965	-65.918	-66.772	-65.918	-66.406	-66.65	-66.284	-54.565	23.401	0.552	0.781	0.323	1.162	1.162	1.467	1.238	1.086
23.601	-63.965	-65.918	-66.772	-65.918	-66.406	-66.528	-66.406	-54.199	23.601	0.628	0.323	0.781	1.162	1.391	1.696	1.238	1.162
23.801	-63.965	-65.918	-66.772	-65.796	-66.528	-66.162	-66.406	-53.955	23.801	0.781	0.018	1.01	1.162	1.315	1.772	1.467	1.162
24.001	-63.965	-65.918	-66.772	-65.918	-66.528	-65.674	-66.406	-53.589	24.001	0.704	0.018	0.857	1.162	1.086	1.696	1.62	1.162
24.201	-63.965	-65.918	-66.772	-65.918	-66.528	-65.186	-66.284	-53.223	24.201	0.323	0.247	0.628	1.162	1.238	1.467	1.544	1.086
24.401	-63.965	-65.918	-66.772	-65.918	-66.406	-64.575	-66.406	-52.856	24.401	0.018	0.475	0.552	1.086	1.62	1.238	1.62	0.857
24.601	-63.965	-65.918	-66.772	-65.918	-66.528	-63.843	-66.406	-52.368	24.601	-0.059	0.628	0.628	0.857	1.772	1.162	1.925	0.628
24.801	-63.965	-65.918	-66.772	-65.918	-66.528	-63.11	-66.406	-51.88	24.801	0.018	0.857	0.781	0.628	1.696	1.162	1.925	0.552
25.001	-64.087	-65.918	-66.772	-65.918	-66.406	-62.256	-66.406	-51.514	25.001	0.247	1.086	0.781	0.552	1.467	1.086	1.544	0.628
25.201	-63.965	-65.918	-66.772	-65.918	-66.528	-61.401	-66.406	-51.025	25.201	0.475	1.086	0.704	0.628	1.238	0.857	1.315	0.857
25.401	-63.965	-65.918	-66.772	-65.918	-66.528	-60.425	-66.406	-50.659	25.401	0.628	0.857	0.857	0.857	1.162	0.704	1.544	1.086
25.601	-63.965	-65.918	-66.772	-65.918	-66.528	-59.57	-66.406	-50.171	25.601	0.781	0.781	1.086	1.086	1.162	0.857	1.925	1.162
25.801	-63.965	-65.918	-66.772	-65.918	-66.406	-58.594	-66.406	-49.561	25.801	0.704	1.162	1.086	1.162	1.162	1.162	1.925	1.162
26.001	-64.087	-65.918	-66.772	-65.918	-66.528	-57.617	-66.406	-49.194	26.001	0.323	1.544	0.857	1.162	1.238	1.391	1.544	1.162
26.201	-64.087	-65.918	-66.772	-65.918	-66.528	-56.641	-66.406	-48.706	26.201	0.094	1.391	0.704	1.086	1.467	1.315	1.238	1.162
26.401	-64.087	-65.918	-66.772	-65.918	-66.528	-55.664	-66.406	-48.096	26.401	0.247	0.933	0.857	0.781	1.544	1.01	1.162	1.162
26.601	-63.965	-65.796	-66.65	-65.918	-66.528	-54.688	-66.406	-47.729	26.601	0.399	0.704	1.086	0.323	1.086	0.933	1.162	1.238
26.801	-64.087	-65.796	-66.65	-65.918	-66.528	-53.711	-66.406	-47.119	26.801	0.247	0.857	1.162	0.094	0.475	1.01	1.162	1.467
27.001	-63.965	-65.918	-66.65	-65.918	-66.528	-52.612	-66.406	-46.631	27.001	0.094	1.086	1.162	0.323	0.323	0.857	1.162	1.62
27.201	-63.965	-65.918	-66.772	-65.918	-66.528	-51.636	-66.406	-46.143	27.201	0.323	1.162	1.162	0.704	0.475	0.628	1.162	1.467
27.401	-63.965	-65.796	-66.772	-65.918	-66.528	-50.659	-66.406	-45.654	27.401	0.781	1.162	1.162	0.704	0.628	0.552	1.162	1.238
27.601	-63.965	-65.918	-66.65	-65.918	-66.528	-49.561	-66.406	-45.166	27.601	1.086	1.162	1.086	0.323	0.933	0.628	1.162	1.162
27.801	-64.087	-65.918	-66.772	-65.918	-66.406	-48.462	-66.406	-44.678	27.801	1.162	1.162	0.857	0.018	1.391	0.857	1.162	1.162
28.001	-63.965	-65.918	-66.65	-65.918	-66.528	-47.363	-66.406	-44.189	28.001	1.162	1.162	0.781	-0.059	1.62	1.086	1.162	1.162
28.201	-63.965	-65.918	-66.772	-65.918	-66.528	-46.143	-66.284	-43.701	28.201	1.162	1.162	1.086	0.018	1.467	1.162	1.162	1.086
28.401	-64.087	-65.918	-66.772	-65.918	-66.528	-44.922	-66.406	-43.213	28.401	1.162	1.162	1.238	0.323	1.162	1.238	1.162	0.857
28.601	-64.087	-65.918	-66.772	-65.918	-66.406	-43.457	-66.406	-42.725	28.601	1.086	1.162	1.01	0.781	0.857	1.467	1.238	0.781
28.801	-64.087	-65.918	-66.65	-65.918	-66.406	-41.87	-66.284	-42.236	28.801	0.857	1.086	0.933	1.01	0.704	1.62	1.544	1.162
29.001	-64.087	-65.918	-66.772	-65.918	-66.528	-39.673	-66.406	-41.626	29.001	0.704	0.857	1.01	0.857	0.781	1.467	1.925	1.544
29.201	-64.087	-65.918	-66.772	-65.918	-66.528	-36.743	-66.284	-41.26	29.201	0.781	0.781	0.781	0.704	0.781	1.238	1.849	1.467
29.401	-64.087	-66.04	-66.772	-65.918	-66.528	-31.006	-66.284	-40.649	29.401	0.781	1.162	0.399	0.857	0.704	1.162	1.238	1.238
29.601	-64.087	-65.918	-66.772	-65.918	-66.528	-11.597	-66.406	-40.161	29.601	0.704	1.544	0.399	1.086	0.781	1.086	0.781	1.162
29.801	-64.087	-65.918	-66.65	-65.918	-66.528	25.513	-66.406	-39.673	29.801	0.857	1.467	0.857	1.162	0.781	0.781	0.933	1.162
30.001	-64.087	-65.918	-66.772	-65.918	-66.528	39.917	-66.284	-39.062	30.001	1.086	1.238	1.315	1.162	0.628	0.399	1.315	1.162
30.201	-63.965	-65.918	-66.772	-65.918	-66.528	43.091	-66.406	-38.574	30.201	1.162	1.086	1.238	1.162	0.552	0.323	1.315	1.162
30.401	-64.087	-65.918	-66.772	-65.918	-66.528	43.091	-66.406	-38.086	30.401	1.162	0.857	0.704	1.086	0.552	0.399	1.01	1.162
30.601	-64.087	-65.918	-66.65	-65.918	-66.406	42.236	-66.406	-37.598	30.601	1.238	0.704	0.475	0.781	0.552	0.247	0.933	1.162
30.801	-64.087	-65.918	-66.772	-65.918	-66.406	41.016	-66.406	-36.987	30.801	1.467	0.857	0.781	0.399	0.552	0.018	1.086	1.162
31.001	-64.087	-65.918	-66.65	-65.918	-66.406	39.551	-66.406	-36.499	31.001	1.544	1.086	1.01	0.399	0.552	-0.059	1.162	1.162
31.201	-64.087	-65.918	-66.772	-65.918	-66.528	38.086	-66.406	-35.889	31.201	1.162	1.238	0.857	0.781	0.628	-0.059	1.162	1.238
31.401	-64.087	-65.918	-66.772	-65.918	-66.528	36.621	-66.406	-35.278	31.401	0.781	1.391	0.704	1.01	0.781	-0.059	1.086	1.467
31.601	-64.087	-65.918	-66.65	-65.918	-66.65	35.156	-66.406	-34.668	31.601	0.857	1.391	0.857	0.781	0.704	0.018	0.857	1.62
31.801	-64.087	-65.918	-66.65	-65.796	-66.528	33.691	-66.406	-34.18	31.801	1.086	1.391	1.01	0.323	0.399	0.247	0.628	1.467
32.001	-64.087	-65.918	-66.65	-65.918	-66.528	32.227	-66.406	-33.447	32.001	1.086	1.772	0.857	0.094	0.399	0.399	0.552	1.238
32.201	-64.209	-65.796	-66.65	-65.918	-66.528	31.128	-66.406	-32.837	32.201	0.933	2.23	0.704	0.323	0.704	0.17	0.628	1.086
32.401	-64.209	-65.796	-66.65	-65.918	-66.528	29.907	-66.284	-32.104	32.401	1.01	2.307	0.857	0.781	0.781	-0.287	0.933	0.399
32.601	-64.209	-65.796	-66.65	-65.918	-66.406	28.809	-66.406	-31.494	32.601	1.315	2.078	1.086	1.01	0.704	-0.44	1.391	-1.127
32.801	-64.209	-65.918	-66.65	-65.918	-66.528	27.832	-66.406	-30.884	32.801	1.391	1.772	1.162	0.857	0.857	-0.059	1.62	-1.89
33.001	-64.209	-65.918	-66.65	-65.918	-66.528	26.855	-66.284	-30.029	33.001	1.238	1.391	1.238	0.704	1.086	0.323	1.467	-0.745
33.201	-64.209	-65.918	-66.65	-65.918	-66.528	26.001	-66.284	-29.175	33.201	1.238	1.01	1.467	0.781	1.086	0.323	1.238	0.628
33.401	-64.209	-65.918	-66.65	-65.918	-66.528	25.269	-66.284	-28.198	33.401	1.467	1.01	1.62	0.704	0.857	0.323	1.162	0.781
33.601	-64.209	-65.918	-66.65	-65.918	-66.528	24.658	-66.406	-27.344	33.601	1.544	1.467	1.467	0.399	0.704	0.475	1.162	0.399
33.801	-64.209	-65.796	-66.65	-65.918	-66.528	24.048	-66.284	-26.367	33.801	1.162	1.925	1.315	0.323	0.781	0.628	1.162	0.399
34.001	-64.209	-65.918	-66.65	-65.918	-66.528	23.438	-66.406	-25.391	34.001	0.781	1.925	1.544	0.399	0.781	0.781	1.162	0.704
34.201	-64.209	-65.918	-66.65	-65.918	-66.528	22.827	-66.284	-24.17	34.201	0.857	1.544	1.925	0.323	0.704	0.781	1.162	0.704
34.401	-64.209	-65.918	-66.65	-65.796	-66.528	22.339	-66.284	-22.949	34.401	1.086	1.315	1.925	0.475	0.704	0.628	1.086	0.323
34.601	-64.209	-65.918	-66.65	-65.796	-66.528	21.973	-66.406	-21.851	34.601	1.162	1.467	1.544	1.086	0.475	0.475	0.781	0.17
34.801	-64.209	-65.918	-66.772	-65.796	-66.528	21.484	-66.406	-20.508	34.801	1.162	1.696	1.315	1.467	0.247	0.323	0.323	0.552
35.001	-64.209	-65.918	-66.65	-65.918	-66.528	20.996	-66.406	-19.165	35.001	1.162	1.772	1.467	1.162	0.552	0.323	0.094	0.857
35.201	-64.209	-65.918	-66.65	-65.918	-66.528	20.63	-66.284	-17.822	35.201	1.162	1.772	1.62	0.704	1.01	0.399	0.323	0.628
35.401	-64.209	-65.918	-66.772	-65.918	-66.528	20.264	-66.284	-16.479	35.401	1.162	1.696	1.391	0.552	1.162	0.323	0.704	0.399
35.601	-64.209	-65.918	-66.772	-65.918	-66.528	20.02	-66.406	-15.137	35.601	1.162	1.391	1.01	0.628	1.162	0.323	0.704	0.475
35.801	-64.209	-65.918	-66.772	-65.918	-66.528	19.653	-66.406	-13.916	35.801	1.238	1.01	1.01	0.857	1.162	0.399	0.323	0.552
36.001	-64.209	-65.918	-66.65	-65.918	-66.65	19.409	-66.406	-12.695	36.001	1.467	0.933	1.238	1.086	1.086	0.323	0.018	0.475
36.201	-64.209	-65.918	-66.65	-65.918	-66.528	19.043	-66.406	-11.597	36.201	1.62	1.086	1.086	1.162	0.781	0.323	-0.059	0.323
36.401	-64.209	-65.918	-66.772	-65.918	-66.528	18.921	-66.406	-10.864	36.401	1.467	1.162	0.857	1.162	0.475	0.399	0.094	0.399
36.601	-64.209	-65.918	-66.772	-65.918	-66.528	18.677	-66.406	-10.01	36.601	1.238	1.162	1.238	1.162	0.628	0.247	0.628	0.704
36.801	-64.209	-65.918	-66.772	-65.918	-66.528	18.433	-66.406	-9.521	36.801	1.162	1.238	1.849	1.162	0.933	0.094	1.162	0.704
37.001	-64.209	-65.918	-66.772	-65.918	-66.528	18.188	-66.406	-9.033	37.001	1.162	1.467	1.925	1.238	0.933	0.247	1.086	0.323
37.201	-64.209	-65.796	-66.772	-65.918	-66.528	17.944	-66.406	-8.545	37.201	1.162	1.544	1.544	1.544	1.01	0.399	0.704	0.018
37.401	-64.209	-65.918	-66.772	-65.796	-66.528	17.822	-66.406	-8.179	37.401	1.162	1.086	1.238	1.925	1.391	0.323	0.552	-0.059
37.601	-64.209	-65.918	-66.772	-65.918	-66.528	17.578	-66.406	-7.812	37.601	1.162	0.552	1.162	1.925	1.62	0.399	0.628	-0.059
37.801	-64.209	-65.918	-66.772	-65.918	-66.528	17.334	-66.406	-7.446	37.801	1.086	0.781	1.162	1.467	1.391	0.704	0.781	-0.059
38.001	-64.331	-65.918	-66.772	-65.918	-66.528	17.09	-66.406	-7.202	38.001	0.857	1.544	1.162	0.933	0.933	0.781	0.704	-0.059
38.201	-64.209	-65.918	-66.772	-65.918	-66.528	16.846	-66.284	-6.958	38.201	0.704	1.849	1.238	0.704	0.628	0.628	0.399	0.018
38.401	-64.331	-65.918	-66.772	-65.918	-66.528	16.724	-66.406	-6.714	38.401	0.857	1.467	1.544	0.933	0.628	0.475	0.399	0.247
38.601	-64.331	-65.918	-66.772	-65.918	-66.528	16.479	-66.406	-6.47	38.601	1.086	0.933	1.849	1.315	0.933	0.247	0.781	0.399
38.801	-64.331	-66.04	-66.772	-65.918	-66.528	16.357	-66.284	-6.226	38.801	1.086	0.704	1.62	1.315	1.315	0.094	1.01	0.247
39.001	-64.331	-66.04	-66.772	-65.918	-66.528	16.113	-66.284	-5.981	39.001	0.781	0.857	1.086	1.01	1.315	0.247	0.857	0.018
39.201	-64.331	-66.04	-66.772	-65.918	-66.528	15.991	-66.284	-5.859	39.201	0.399	1.01	0.933	1.01	1.01	0.399	0.704	0.018
39.401	-64.331	-65.918	-66.772	-65.918	-66.528	15.869	-66.284	-5.615	39.401	0.399	0.857	1.086	1.315	1.01	0.323	0.781	0.323
39.601	-64.331	-66.04	-66.65	-66.04	-66.528	15.625	-66.284	-5.371	39.601	0.781	0.704	1.086	1.315	1.315	0.399	0.704	0.704
39.801	-64.331	-66.04	-66.772	-66.04	-66.406	15.503	-66.284	-5.249	39.801	1.01	0.857	0.857	1.01	1.391	0.704	0.323	0.781
40.001	-64.331	-66.04	-66.772	-66.04	-66.528	15.381	-66.284	-5.005	40.001	0.781	1.086	0.704	0.933	1.315	0.704	0.094	0.628
40.201	-64.331	-66.04	-66.772	-65.918	-66.406	15.137	-66.284	-4.883	40.201	0.399	1.162	0.933	1.086	1.467	0.323	0.323	0.475
40.401	-64.331	-66.04	-66.772	-66.04	-66.528	14.893	-66.284	-4.639	40.401	0.323	1.162	1.315	1.162	1.62	0.17	0.781	0.247
40.601	-64.331	-66.04	-66.772	-66.04	-66.528	14.771	-66.284	-4.517	40.601	0.475	1.162	1.315	1.162	1.391	0.628	1.01	0.094
40.801	-64.453	-66.04	-66.772	-66.04	-66.528	14.648	-66.284	-4.395	40.801	0.628	1.086	1.01	1.162	0.933	1.238	0.781	0.323
41.001	-64.331	-66.04	-66.772	-66.04	-66.528	14.526	-66.284	-4.15	41.001	0.857	0.857	1.01	1.162	0.781	1.315	0.399	0.704
41.201	-64.209	-66.04	-66.772	-66.04	-66.528	14.282	-66.284	-4.028	41.201	1.086	0.628	1.315	1.162	1.162	1.01	0.399	0.704
41.402	-64.331	-66.04	-66.772	-66.04	-66.528	14.16	-66.406	-3.906	41.402	1.086	0.552	1.315	1.162	1.467	1.01	0.704	0.399
41.602	-64.331	-66.04	-66.772	-65.918	-66.528	14.038	-66.284	-3.784	41.602	0.857	0.628	1.01	1.162	1.238	1.238	0.781	0.399
41.802	-64.331	-66.04	-66.772	-66.04	-66.528	13.794	-66.284	-3.662	41.802	0.704	0.857	0.933	1.162	1.086	1.086	0.704	0.704
42.002	-64.331	-66.04	-66.772	-66.04	-66.528	13.55	-66.284	-3.54	42.002	0.781	1.086	1.086	1.162	1.315	0.781	0.857	0.704
42.202	-64.331	-65.918	-66.772	-66.04	-66.528	13.428	-66.284	-3.296	42.202	0.704	1.162	1.086	1.162	1.391	0.857	1.086	0.399
42.402	-64.331	-65.918	-66.772	-66.04	-66.528	13.306	-66.406	-3.174	42.402	0.399	1.086	0.781	1.162	1.238	1.162	1.086	0.323
42.602	-64.209	-65.918	-66.772	-66.04	-66.65	13.062	-66.284	-3.052	42.602	0.399	0.781	0.399	1.162	1.162	1.391	0.781	0.475
42.802	-64.209	-65.918	-66.772	-66.04	-66.65	12.817	-66.406	-3.052	42.802	0.781	0.399	0.399	1.162	1.238	1.315	0.399	0.552
43.002	-64.209	-66.04	-66.772	-66.04	-66.65	12.695	-66.284	-2.93	43.002	1.01	0.399	0.781	1.162	1.467	1.086	0.399	0.552
43.202	-64.331	-65.918	-66.772	-65.918	-66.65	12.451	-66.406	-2.808	43.202	0.781	0.704	1.01	1.162	1.62	1.238	0.704	0.628
43.402	-64.209	-65.918	-66.772	-65.918	-66.528	12.329	-66.284	-2.686	43.402	0.323	0.704	0.781	1.162	1.467	1.467	0.781	0.933
43.602	-64.331	-66.04	-66.772	-66.04	-66.528	12.085	-66.284	-2.563	43.602	0.094	0.399	0.399	1.162	1.238	1.162	0.704	1.391
43.802	-64.331	-66.04	-66.772	-66.04	-66.528	11.963	-66.284	-2.441	43.802	0.323	0.399	0.399	1.162	1.086	0.781	0.933	1.544
44.002	-64.331	-66.04	-66.772	-66.04	-66.65	11.841	-66.406	-2.441	44.002	0.781	0.704	0.704	1.162	0.857	0.933	1.391	1.162
44.202	-64.331	-66.04	-66.772	-65.918	-66.528	11.597	-66.406	-2.441	44.202	1.086	0.781	0.704	1.162	0.704	1.315	1.696	0.857
44.402	-64.453	-66.04	-66.772	-66.04	-66.528	11.353	-66.406	-2.319	44.402	1.162	0.628	0.399	1.162	0.857	1.315	1.849	1.086
44.602	-64.331	-65.918	-66.772	-66.04	-66.528	11.108	-66.406	-2.319	44.602	1.086	0.552	0.323	1.086	1.086	1.01	2.078	1.162
44.802	-64.331	-65.918	-66.65	-66.162	-66.528	10.986	-66.406	-2.319	44.802	0.857	0.628	0.475	0.781	1.086	0.933	2.154	0.704
45.002	-64.209	-65.918	-66.772	-66.04	-66.528	10.742	-66.406	-2.197	45.002	0.704	0.857	0.552	0.399	0.781	1.086	1.62	0.475
45.202	-64.331	-66.04	-66.772	-66.04	-66.65	10.498	-66.406	-2.197	45.202	0.857	1.086	0.552	0.399	0.399	1.086	0.781	0.781
45.402	-64.331	-66.04	-66.772	-66.04	-66.528	10.254	-66.406	-2.197	45.402	1.086	1.162	0.628	0.781	0.475	0.857	0.475	1.162
45.602	-64.209	-65.918	-66.772	-66.04	-66.528	10.132	-66.406	-2.075	45.602	1.162	1.162	0.857	1.086	1.01	0.704	0.704	1.467
45.802	-64.331	-66.04	-66.772	-66.04	-66.528	9.888	-66.406	-2.075	45.802	1.086	1.162	1.01	1.086	1.238	0.857	0.704	1.62
46.002	-64.331	-66.04	-66.772	-66.04	-66.528	9.766	-66.406	-2.075	46.002	0.857	1.162	0.781	0.857	1.01	1.086	0.323	1.467
46.202	-64.331	-65.918	-66.772	-66.04	-66.528	9.521	-66.406	-2.075	46.202	0.628	1.086	0.399	0.704	1.01	1.086	0.17	1.238
46.402	-64.331	-66.04	-66.772	-66.04	-66.528	9.277	-66.406	-2.197	46.402	0.552	0.857	0.399	0.781	1.315	0.857	0.628	1.086
46.602	-64.331	-66.04	-66.772	-66.04	-66.528	9.033	-66.406	-2.075	46.602	0.628	0.628	0.704	0.781	1.315	0.704	1.238	0.781
46.802	-64.331	-66.04	-66.772	-66.04	-66.528	8.911	-66.406	-2.075	46.802	0.857	0.552	0.781	0.704	1.01	0.857	1.391	0.399
47.002	-64.331	-66.04	-66.65	-66.162	-66.528	8.545	-66.406	-2.197	47.002	1.086	0.552	0.704	0.781	0.933	1.01	1.238	0.399
47.202	-64.209	-66.04	-66.772	-66.04	-66.528	8.423	-66.406	-2.197	47.202	1.162	0.552	0.857	0.704	1.01	0.857	1.162	0.781
47.402	-64.331	-66.04	-66.772	-66.04	-66.528	8.301	-66.406	-2.197	47.402	1.162	0.628	1.086	0.399	0.781	0.704	1.162	1.086
47.602	-64.209	-66.04	-66.772	-66.162	-66.528	8.057	-66.406	-2.197	47.602	1.162	0.857	1.086	0.399	0.323	0.857	1.162	1.162
47.802	-64.209	-66.04	-66.772	-66.162	-66.65	7.812	-66.406	-2.319	47.802	1.086	1.086	0.781	0.781	0.094	1.01	1.162	1.162
48.002	-64.209	-66.04	-66.772	-66.04	-66.528	7.69	-66.406	-2.319	48.002	0.857	1.162	0.399	1.01	0.323	0.857	1.162	1.086
48.202	-64.331	-65.918	-66.772	-66.04	-66.528	7.446	-66.406	-2.319	48.202	0.704	1.162	0.399	0.857	0.781	0.704	1.162	0.857
48.402	-64.209	-66.04	-66.772	-66.04	-66.528	7.202	-66.406	-2.441	48.402	0.781	1.086	0.704	0.704	1.01	0.781	1.162	0.628
48.602	-64.209	-66.04	-66.772	-66.04	-66.528	7.08	-66.406	-2.441	48.602	0.781	0.781	0.781	0.857	0.781	0.781	1.162	0.552
48.802	-64.209	-65.918	-66.772	-66.04	-66.65	6.714	-66.406	-2.441	48.802	0.781	0.399	0.704	1.086	0.399	0.704	1.162	0.628
49.002	-64.209	-65.918	-66.772	-66.04	-66.65	6.592	-66.406	-2.563	49.002	1.162	0.399	0.781	1.086	0.399	0.857	1.162	0.857
49.202	-64.209	-65.918	-66.772	-66.04	-66.528	6.348	-66.406	-2.686	49.202	1.544	0.704	0.781	0.857	0.704	1.01	1.086	1.086
49.402	-64.209	-65.918	-66.772	-66.04	-66.528	6.104	-66.406	-2.808	49.402	1.467	0.704	0.704	0.704	0.781	0.781	0.857	1.162
49.602	-64.331	-65.918	-66.772	-66.04	-66.528	5.859	-66.406	-2.808	49.602	1.238	0.399	0.857	0.781	0.704	0.399	0.781	1.162
49.802	-64.209	-65.918	-66.772	-66.04	-66.528	5.615	-66.528	-2.93	49.802	1.086	0.399	1.01	0.781	0.781	0.323	1.162	1.086
50.002	-64.209	-65.918	-66.772	-66.162	-66.528	5.371	-66.406	-2.93	50.002	0.857	0.781	0.781	0.704	0.781	0.475	1.544	0.781
50.202	-64.209	-65.918	-66.65	-66.162	-66.528	5.249	-66.406	-3.052	50.202	0.704	1.086	0.399	0.857	0.628	0.628	1.467	0.323
50.402	-64.209	-65.918	-66.772	-66.04	-66.528	5.005	-66.406	-3.052	50.402	0.933	1.238	0.399	1.086	0.628	0.781	1.315	0.094
50.602	-64.331	-66.04	-66.772	-66.04	-66.528	4.761	-66.406	-3.174	50.602	1.391	1.544	0.857	1.162	0.857	0.704	1.467	0.323
50.802	-64.331	-66.04	-66.65	-66.162	-66.528	4.517	-66.406	-3.296	50.802	1.62	1.925	1.315	1.086	1.01	0.323	1.544	0.781
51.002	-64.331	-66.04	-66.772	-66.04	-66.528	4.272	-66.406	-3.418	51.002	1.467	1.925	1.238	0.857	0.857	0.018	1.162	1.01
51.202	-64.209	-65.918	-66.772	-66.04	-66.528	4.028	-66.528	-3.54	51.202	1.238	1.544	0.628	0.704	0.628	-0.059	0.781	0.857
51.402	-64.331	-65.918	-66.65	-66.162	-66.528	3.784	-66.528	-3.662	51.402	1.162	1.238	0.17	0.781	0.628	-0.059	0.857	0.628
51.602	-64.331	-66.04	-66.65	-66.162	-66.528	3.54	-66.528	-3.784	51.602	1.238	1.238	0.323	0.704	0.857	0.018	1.086	0.552
51.802	-64.331	-66.04	-66.65	-66.04	-66.528	3.296	-66.406	-3.906	51.802	1.467	1.544	0.781	0.399	1.01	0.247	1.162	0.628
52.002	-64.331	-65.918	-66.65	-66.162	-66.528	3.052	-66.406	-3.906	52.002	1.62	1.925	1.086	0.399	0.857	0.399	1.162	0.857
52.202	-64.331	-65.918	-66.65	-66.04	-66.406	2.808	-66.406	-4.15	52.202	1.544	1.925	1.238	0.781	0.704	0.247	1.086	1.086
52.402	-64.331	-65.918	-66.65	-66.04	-66.528	2.563	-66.406	-4.15	52.402	1.62	1.544	1.467	1.01	0.857	0.018	0.857	1.162
52.602	-64.331	-66.04	-66.65	-66.04	-66.406	2.197	-66.528	-4.272	52.602	1.925	1.238	1.62	0.781	1.086	0.018	0.628	1.162
52.802	-64.331	-66.04	-66.65	-66.04	-66.406	1.953	-66.406	-4.517	52.802	1.925	1.238	1.467	0.399	1.086	0.247	0.475	1.086
53.002	-64.331	-65.918	-66.65	-66.162	-66.406	1.709	-66.528	-4.517	53.002	1.544	1.467	1.238	0.399	0.857	0.399	0.323	0.857
53.202	-64.331	-66.04	-66.65	-66.162	-66.406	1.465	-66.528	-4.639	53.202	1.315	1.62	1.162	0.781	0.704	0.247	0.399	0.628
53.402	-64.331	-65.918	-66.65	-66.162	-66.528	1.221	-66.528	-4.883	53.402	1.467	1.467	1.238	1.086	0.857	0.018	0.704	0.552
53.602	-64.331	-66.04	-66.65	-66.162	-66.528	0.977	-66.528	-5.005	53.602	1.696	1.315	1.467	1.086	1.01	-0.059	0.704	0.628
53.802	-64.331	-66.04	-66.65	-66.162	-66.528	0.732	-66.528	-5.127	53.802	1.772	1.467	1.62	0.781	0.857	-0.059	0.399	0.781
54.002	-64.331	-65.918	-66.65	-66.162	-66.528	0.488	-66.406	-5.249	54.002	1.696	1.62	1.467	0.399	0.704	-0.059	0.399	0.704
54.202	-64.331	-66.04	-66.65	-66.162	-66.528	0.244	-66.528	-5.371	54.202	1.467	1.544	1.238	0.399	0.781	-0.059	0.704	0.399
54.402	-64.331	-66.04	-66.65	-66.162	-66.528	-0.122	-66.528	-5.493	54.402	1.238	1.544	1.238	0.781	0.704	0.018	0.704	0.323
54.602	-64.331	-65.918	-66.65	-66.162	-66.406	-0.366	-66.528	-5.615	54.602	1.162	1.62	1.467	1.086	0.399	0.247	0.399	0.399
54.802	-64.209	-65.918	-66.65	-66.04	-66.528	-0.488	-66.528	-5.859	54.802	1.162	1.467	1.62	1.162	0.475	0.399	0.399	0.323
55.002	-64.209	-65.918	-66.528	-66.04	-66.528	-0.732	-66.406	-5.981	55.002	1.162	1.238	1.467	1.086	1.086	0.247	0.781	0.399
55.202	-64.331	-65.918	-66.65	-66.162	-66.528	-0.977	-66.528	-6.104	55.202	1.162	1.238	1.238	0.781	1.544	0.018	1.01	0.704
55.402	-64.331	-65.918	-66.65	-66.162	-66.528	-1.343	-66.528	-6.226	55.402	1.162	1.467	1.162	0.399	1.467	0.018	0.781	0.781
55.602	-64.331	-65.918	-66.65	-66.162	-66.528	-1.587	-66.406	-6.47	55.602	1.162	1.62	1.162	0.399	1.238	0.247	0.323	0.704
55.802	-64.209	-65.918	-66.772	-66.162	-66.528	-1.831	-66.528	-6.47	55.802	1.238	1.467	1.162	0.857	1.162	0.399	0.094	0.781
56.002	-64.209	-66.04	-66.65	-66.162	-66.528	-2.075	-66.528	-6.714	56.002	1.467	1.315	1.086	1.391	1.086	0.247	0.247	0.704
56.202	-64.209	-65.918	-66.65	-66.162	-66.528	-2.441	-66.406	-6.836	56.202	1.62	1.467	0.857	1.696	0.857	0.018	0.399	0.323
56.402	-64.331	-65.918	-66.65	-66.162	-66.528	-2.686	-66.528	-7.08	56.402	1.467	1.62	0.704	1.849	0.704	-0.059	0.247	0.094
56.602	-64.331	-65.918	-66.65	-66.162	-66.528	-2.93	-66.406	-7.08	56.602	1.315	1.467	0.933	2.001	0.857	-0.059	0.094	0.247
56.802	-64.331	-65.918	-66.65	-66.162	-66.406	-3.296	-66.406	-7.202	56.802	1.467	1.315	1.391	1.925	1.086	-0.059	0.247	0.399
57.002	-64.331	-66.04	-66.772	-66.162	-66.406	-3.418	-66.406	-7.324	57.002	1.544	1.544	1.62	1.544	1.162	0.018	0.475	0.247
57.202	-64.331	-66.04	-66.65	-66.162	-66.406	-3.662	-66.528	-7.446	57.202	1.086	1.849	1.467	1.315	1.162	0.247	0.552	-0.059
57.402	-64.331	-66.04	-66.65	-66.04	-66.406	-4.028	-66.406	-7.69	57.402	0.475	1.62	1.238	1.467	1.162	0.399	0.552	-0.364
57.602	-64.453	-66.04	-66.65	-66.04	-66.406	-4.272	-66.406	-7.935	57.602	0.399	1.086	1.238	1.62	1.162	0.323	0.628	-0.516
57.802	-64.453	-66.04	-66.65	-66.04	-66.406	-4.517	-66.406	-8.057	57.802	0.781	1.01	1.544	1.544	1.162	0.399	0.857	-0.364
58.002	-64.331	-66.04	-66.772	-66.04	-66.406	-4.761	-66.406	-8.057	58.002	1.086	1.391	1.849	1.62	1.162	0.704	1.086	-0.135
58.202	-64.331	-66.04	-66.65	-66.04	-66.406	-5.127	-66.406	-8.301	58.202	1.086	1.62	1.696	1.925	1.086	0.704	1.162	0.018
58.402	-64.331	-66.04	-66.772	-66.04	-66.406	-5.371	-66.406	-8.423	58.402	0.857	1.391	1.391	1.925	0.933	0.323	1.162	0.247
58.602	-64.453	-66.04	-66.65	-66.04	-66.406	-5.615	-66.406	-8.545	58.602	0.704	0.933	1.391	1.544	1.01	0.094	1.162	0.399
58.802	-64.331	-66.04	-66.65	-66.04	-66.406	-5.859	-66.406	-8.667	58.802	0.857	0.781	1.391	1.238	1.315	0.323	1.162	0.247
59.002	-64.331	-66.04	-66.65	-66.162	-66.406	-6.226	-66.406	-8.789	59.002	1.086	1.162	1.238	1.238	1.391	0.704	1.162	0.094
59.202	-64.331	-66.04	-66.65	-66.04	-66.528	-6.47	-66.406	-8.911	59.202	1.162	1.544	1.238	1.467	1.238	0.781	1.162	0.323
59.402	-64.331	-66.04	-66.65	-66.162	-66.528	-6.714	-66.406	-9.155	59.402	1.086	1.467	1.467	1.544	1.162	0.628	1.162	0.704
59.602	-64.331	-66.04	-66.65	-66.162	-66.406	-6.958	-66.406	-9.399	59.602	0.857	1.315	1.62	1.162	1.162	0.552	1.086	0.704
59.802	-64.453	-66.04	-66.65	-66.162	-66.406	-7.202	-66.406	-9.521	59.802	0.628	1.467	1.467	0.781	1.238	0.628	0.857	0.323
60.002	-64.331	-66.04	-66.65	-66.162	-66.406	-7.446	-66.406	-9.766	60.002	0.475	1.62	1.238	0.857	1.467	0.857	0.704	0.018
60.202	-64.331	-66.04	-66.65	-66.162	-66.406	-7.69	-66.406	-9.766	60.202	0.323	1.467	1.238	1.086	1.696	1.086	0.857	-0.059
60.402	-64.331	-65.918	-66.65	-66.162	-66.406	-7.935	-66.406	-10.01	60.402	0.323	1.238	1.467	1.162	1.772	1.162	1.086	0.018
60.602	-64.331	-66.04	-66.65	-66.162	-66.406	-8.179	-66.528	-10.132	60.602	0.399	1.086	1.62	1.162	1.696	1.162	1.086	0.323
60.802	-64.331	-66.04	-66.65	-66.162	-66.406	-8.423	-66.406	-10.254	60.802	0.323	0.857	1.467	1.162	1.391	1.162	0.857	0.781
61.002	-64.331	-66.04	-66.65	-66.284	-66.406	-8.789	-66.406	-10.376	61.002	0.399	0.628	1.315	1.162	0.933	1.162	0.704	1.01
61.202	-64.331	-66.04	-66.65	-66.162	-66.528	-8.911	-66.406	-10.62	61.202	0.704	0.552	1.467	1.086	0.781	1.162	0.857	0.857
61.402	-64.453	-65.918	-66.772	-66.162	-66.406	-9.277	-66.528	-10.742	61.402	0.781	0.704	1.62	0.933	1.162	1.162	1.086	0.628
61.602	-64.331	-65.918	-66.772	-66.162	-66.406	-9.521	-66.406	-10.864	61.602	0.628	1.086	1.391	1.01	1.544	1.162	1.162	0.475
61.802	-64.331	-66.04	-66.65	-66.162	-66.406	-9.644	-66.528	-11.108	61.802	0.552	1.162	1.01	1.315	1.467	1.162	1.162	0.323
62.002	-64.331	-65.918	-66.65	-66.284	-66.406	-9.888	-66.528	-11.23	62.002	0.628	0.628	1.01	1.391	1.238	1.162	1.162	0.399
62.202	-64.453	-66.04	-66.772	-66.162	-66.406	-10.132	-66.406	-11.353	62.202	0.781	0.17	1.315	1.238	1.162	1.162	1.162	0.704
62.402	-64.453	-66.04	-66.65	-66.162	-66.406	-10.376	-66.406	-11.597	62.402	0.704	0.323	1.315	1.086	1.162	1.238	1.162	0.781
62.602	-64.453	-66.04	-66.772	-66.284	-66.528	-10.62	-66.406	-11.719	62.602	0.399	0.704	0.933	0.857	1.238	1.467	1.162	0.704
62.802	-64.331	-66.04	-66.65	-66.284	-66.406	-10.864	-66.406	-11.841	62.802	0.399	0.781	0.704	0.704	1.467	1.62	1.238	0.857
63.002	-64.453	-66.04	-66.772	-66.162	-66.406	-11.108	-66.406	-11.963	63.002	0.781	0.704	0.781	0.857	1.544	1.467	1.467	1.086
63.202	-64.453	-65.918	-66.65	-66.162	-66.406	-11.353	-66.528	-12.207	63.202	1.01	0.781	0.781	1.086	1.162	1.238	1.62	1.162
63.402	-64.331	-66.04	-66.65	-66.162	-66.406	-11.597	-66.406	-12.329	63.402	0.857	0.781	0.704	1.162	0.781	1.162	1.467	1.162
63.602	-64.453	-66.04	-66.65	-66.284	-66.406	-11.841	-66.406	-12.451	63.602	0.628	0.628	0.933	1.162	0.933	1.086	1.238	1.162
63.802	-64.453	-66.04	-66.65	-66.284	-66.406	-11.963	-66.406	-12.695	63.802	0.552	0.552	1.315	1.162	1.391	0.857	1.162	1.086
64.002	-64.331	-66.04	-66.65	-66.162	-66.406	-12.207	-66.406	-12.817	64.002	0.552	0.552	1.238	1.162	1.62	0.704	1.162	0.857
64.202	-64.453	-66.04	-66.65	-66.162	-66.406	-12.329	-66.406	-12.939	64.202	0.475	0.552	0.704	1.162	1.467	0.857	1.162	0.704
64.402	-64.331	-66.04	-66.65	-66.162	-66.406	-12.695	-66.406	-13.062	64.402	0.323	0.628	0.475	1.162	1.238	1.01	1.238	0.857
64.602	-64.331	-66.04	-66.65	-66.162	-66.406	-12.817	-66.284	-13.184	64.602	0.399	0.857	0.781	1.086	1.162	0.857	1.467	1.01
64.802	-64.331	-66.04	-66.65	-66.162	-66.284	-13.062	-66.406	-13.306	64.802	0.704	1.086	1.01	0.857	1.162	0.781	1.62	0.857
65.002	-64.331	-66.04	-66.65	-66.162	-66.284	-13.306	-66.406	-13.55	65.002	0.704	1.162	0.781	0.704	1.162	1.162	1.467	0.704
65.202	-64.453	-66.04	-66.65	-66.162	-66.406	-13.428	-66.284	-13.672	65.202	0.399	1.086	0.475	0.857	1.238	1.467	1.315	0.857
65.402	-64.331	-66.04	-66.65	-66.162	-66.284	-13.672	-66.406	-13.794	65.402	0.399	0.781	0.704	1.086	1.467	1.086	1.467	1.086
65.602	-64.331	-66.04	-66.65	-66.284	-66.406	-13.794	-66.406	-13.916	65.602	0.781	0.399	1.238	1.086	1.62	0.552	1.62	1.162
65.802	-64.331	-66.04	-66.65	-66.284	-66.406	-14.038	-66.406	-14.038	65.802	1.086	0.399	1.315	0.857	1.467	0.704	1.467	1.238
66.002	-64.331	-66.04	-66.65	-66.284	-66.406	-14.282	-66.406	-14.282	66.002	1.162	0.704	0.857	0.704	1.238	1.238	1.238	1.467
66.202	-64.331	-65.918	-66.65	-66.162	-66.406	-14.404	-66.406	-14.404	66.202	1.162	0.704	0.475	0.781	1.162	1.315	1.162	1.62
66.402	-64.331	-66.04	-66.65	-66.284	-66.406	-14.648	-66.406	-14.526	66.402	1.162	0.323	0.704	0.704	1.162	0.933	1.162	1.391
66.602	-64.331	-66.04	-66.65	-66.284	-66.406	-14.771	-66.406	-14.771	66.602	1.086	0.094	1.162	0.399	1.162	0.704	1.086	0.933
66.802	-64.331	-66.04	-66.65	-66.284	-66.406	-14.893	-66.406	-14.893	66.802	0.781	0.323	1.086	0.399	1.162	0.857	0.857	0.781
67.002	-64.453	-66.04	-66.65	-66.162	-66.406	-15.137	-66.528	-15.015	67.002	0.399	0.781	0.781	0.781	1.162	1.01	0.704	1.238
67.202	-64.331	-66.04	-66.65	-66.284	-66.406	-15.381	-66.528	-15.137	67.202	0.399	1.086	0.857	1.01	1.162	0.857	0.933	1.849
67.402	-64.331	-65.918	-66.65	-66.284	-66.406	-15.503	-66.528	-15.259	67.402	0.781	1.162	1.086	0.781	1.162	0.704	1.467	1.849
67.602	-64.331	-66.04	-66.65	-66.284	-66.406	-15.625	-66.406	-15.381	67.602	1.01	1.086	1.162	0.399	1.086	0.857	1.925	1.238
67.802	-64.453	-65.918	-66.65	-66.284	-66.406	-15.747	-66.528	-15.625	67.802	0.857	0.781	1.086	0.399	0.857	1.162	1.849	0.781
68.002	-64.331	-66.04	-66.65	-66.284	-66.406	-15.991	-66.528	-15.747	68.002	0.704	0.399	0.857	0.704	0.704	1.467	1.238	0.857
68.202	-64.331	-66.04	-66.65	-66.284	-66.406	-16.113	-66.528	-15.869	68.202	0.857	0.399	0.704	0.704	0.857	1.62	0.781	1.01
68.402	-64.453	-65.918	-66.65	-66.284	-66.406	-16.357	-66.406	-16.113	68.402	1.086	0.781	0.857	0.399	1.086	1.544	0.857	0.857
68.602	-64.331	-66.04	-66.65	-66.284	-66.406	-16.479	-66.406	-16.235	68.602	1.162	1.086	1.01	0.399	1.086	1.467	1.086	0.704
68.803	-64.331	-65.918	-66.772	-66.406	-66.406	-16.724	-66.528	-16.357	68.803	1.162	1.162	0.933	0.704	0.857	1.238	1.238	0.857
69.003	-64.453	-65.918	-66.65	-66.406	-66.406	-16.846	-66.406	-16.479	69.003	1.238	1.162	0.933	0.781	0.704	0.704	1.467	1.01
69.203	-64.453	-66.04	-66.65	-66.284	-66.406	-16.968	-66.406	-16.602	69.203	1.467	1.162	1.01	0.704	0.857	0.399	1.62	0.857
69.403	-64.453	-66.04	-66.65	-66.284	-66.406	-17.09	-66.406	-16.724	69.403	1.62	1.162	0.857	0.781	1.01	0.475	1.391	0.704
69.603	-64.331	-66.04	-66.65	-66.162	-66.406	-17.334	-66.528	-16.846	69.603	1.467	1.162	0.628	0.704	0.857	0.628	0.933	0.857
69.803	-64.331	-66.04	-66.65	-66.162	-66.406	-17.456	-66.406	-17.09	69.803	1.315	1.162	0.628	0.399	0.704	0.781	0.704	1.086
70.003	-64.331	-66.04	-66.65	-66.284	-66.406	-17.578	-66.528	-17.212	70.003	1.467	1.238	0.857	0.399	0.781	0.781	0.857	1.086
70.203	-64.331	-66.04	-66.65	-66.162	-66.406	-17.822	-66.528	-17.334	70.203	1.62	1.391	1.086	0.781	0.781	0.704	1.162	0.781
70.403	-64.331	-66.04	-66.65	-66.162	-66.406	-17.944	-66.528	-17.456	70.403	1.467	1.238	1.162	1.086	0.628	0.857	1.544	0.399
70.603	-64.331	-66.04	-66.65	-66.162	-66.284	-18.066	-66.406	-17.7	70.603	1.238	0.704	1.238	1.162	0.628	1.086	1.925	0.475
70.803	-64.331	-66.04	-66.65	-66.162	-66.406	-18.188	-66.406	-17.822	70.803	1.162	0.475	1.467	1.086	0.857	1.086	1.925	1.01
71.003	-64.453	-66.04	-66.772	-66.162	-66.406	-18.433	-66.406	-17.944	71.003	1.086	0.781	1.544	0.857	0.933	0.857	1.544	1.238
71.203	-64.331	-65.918	-66.65	-66.162	-66.406	-18.555	-66.528	-18.066	71.203	0.857	1.086	1.086	0.704	0.628	0.628	1.238	1.01
71.403	-64.331	-65.918	-66.65	-66.162	-66.406	-18.677	-66.528	-18.188	71.403	0.781	1.162	0.552	0.781	0.399	0.475	1.162	1.01
71.603	-64.331	-65.918	-66.65	-66.284	-66.406	-18.799	-66.528	-18.311	71.603	1.162	1.162	0.704	0.781	0.475	0.323	1.162	1.391
71.803	-64.331	-65.918	-66.65	-66.284	-66.406	-19.043	-66.528	-18.433	71.803	1.544	1.162	1.238	0.704	0.552	0.323	1.086	1.62
72.003	-64.331	-66.04	-66.65	-66.162	-66.406	-19.165	-66.528	-18.677	72.003	1.391	1.162	1.391	0.857	0.475	0.399	0.857	1.467
72.203	-64.453	-65.918	-66.65	-66.284	-66.406	-19.287	-66.528	-18.799	72.203	0.933	1.162	1.238	1.01	0.323	0.323	0.704	1.315
72.403	-64.331	-65.918	-66.65	-66.284	-66.406	-19.409	-66.528	-18.921	72.403	0.704	1.162	1.162	0.857	0.399	0.323	0.857	1.467
72.603	-64.331	-65.918	-66.65	-66.284	-66.406	-19.531	-66.528	-19.043	72.603	0.781	1.238	1.162	0.628	0.704	0.475	1.086	1.544
72.803	-64.453	-65.918	-66.65	-66.162	-66.406	-19.775	-66.528	-19.165	72.803	0.781	1.467	1.162	0.552	0.781	0.552	1.086	1.086
73.003	-64.453	-65.918	-66.65	-66.284	-66.406	-19.897	-66.528	-19.409	73.003	0.628	1.544	1.162	0.628	0.628	0.552	0.857	0.475
73.203	-64.453	-65.918	-66.65	-66.284	-66.406	-19.897	-66.528	-19.409	73.203	0.628	1.162	1.238	0.857	0.552	0.552	0.704	0.399
73.403	-64.331	-65.918	-66.772	-66.284	-66.406	-20.142	-66.528	-19.531	73.403	1.01	0.781	1.467	1.086	0.628	0.552	0.781	0.781
73.603	-64.453	-65.918	-66.65	-66.284	-66.406	-20.264	-66.528	-19.775	73.603	1.62	0.933	1.62	1.162	0.857	0.552	0.704	1.086
73.803	-64.453	-65.918	-66.65	-66.162	-66.406	-20.386	-66.528	-19.897	73.803	1.849	1.391	1.467	1.162	1.086	0.552	0.323	1.086
74.003	-64.331	-65.918	-66.65	-66.284	-66.406	-20.508	-66.528	-20.02	74.003	1.544	1.62	1.315	1.162	1.162	0.552	0.094	0.857
74.203	-64.331	-65.918	-66.65	-66.284	-66.406	-20.63	-66.528	-20.264	74.203	1.238	1.467	1.467	1.162	1.162	0.475	0.247	0.704
74.403	-64.331	-65.918	-66.65	-66.162	-66.406	-20.752	-66.528	-20.386	74.403	1.162	1.238	1.62	1.162	1.162	0.323	0.475	0.857
74.603	-64.331	-65.796	-66.65	-66.162	-66.406	-20.874	-66.528	-20.508	74.603	1.162	1.162	1.467	1.238	1.162	0.399	0.552	1.01
74.803	-64.331	-65.796	-66.65	-66.284	-66.406	-20.996	-66.528	-20.63	74.803	1.162	1.162	1.238	1.391	1.162	0.704	0.475	0.857
75.003	-64.453	-65.918	-66.772	-66.284	-66.406	-21.118	-66.528	-20.752	75.003	1.162	1.238	1.238	1.315	1.162	0.704	0.323	0.704
75.203	-64.331	-65.796	-66.65	-66.284	-66.406	-21.24	-66.528	-20.874	75.203	1.162	1.467	1.467	1.01	1.086	0.323	0.323	0.781
75.403	-64.453	-65.918	-66.65	-66.284	-66.406	-21.362	-66.65	-20.996	75.403	1.162	1.62	1.62	0.933	0.857	0.018	0.399	0.704
75.603	-64.453	-65.918	-66.65	-66.162	-66.406	-21.484	-66.528	-21.118	75.603	1.162	1.467	1.467	1.086	0.628	0.018	0.247	0.323
75.803	-64.453	-65.918	-66.65	-66.284	-66.406	-21.606	-66.528	-21.24	75.803	1.162	1.162	1.315	1.162	0.552	0.323	0.018	0.094
76.003	-64.331	-65.918	-66.65	-66.162	-66.406	-21.729	-66.528	-21.362	76.003	1.162	0.857	1.467	1.162	0.552	0.704	0.018	0.247
76.203	-64.453	-65.918	-66.65	-66.162	-66.406	-21.851	-66.528	-21.484	76.203	1.162	0.628	1.62	1.238	0.552	0.704	0.323	0.399
76.403	-64.453	-65.918	-66.65	-66.284	-66.406	-21.973	-66.528	-21.606	76.403	1.162	0.552	1.544	1.467	0.628	0.323	0.781	0.323
76.603	-64.331	-65.918	-66.65	-66.162	-66.406	-22.095	-66.528	-21.729	76.603	1.162	0.628	1.544	1.62	0.857	0.018	1.086	0.399
76.803	-64.331	-65.918	-66.65	-66.162	-66.406	-22.217	-66.528	-21.851	76.803	1.162	0.857	1.62	1.467	1.086	0.018	1.238	0.704
77.003	-64.331	-65.918	-66.65	-66.162	-66.406	-22.339	-66.406	-21.973	77.003	1.162	1.086	1.467	1.315	1.162	0.323	1.467	0.704
77.203	-64.331	-65.918	-66.65	-66.162	-66.406	-22.461	-66.528	-22.095	77.203	1.086	1.162	1.238	1.391	1.162	0.781	1.544	0.399
77.403	-64.453	-66.04	-66.65	-66.284	-66.406	-22.583	-66.528	-22.217	77.403	0.857	1.162	1.238	1.315	1.162	1.01	1.162	0.399
77.603	-64.453	-66.04	-66.772	-66.162	-66.406	-22.705	-66.528	-22.339	77.603	0.704	1.162	1.391	1.01	1.162	0.781	0.781	0.704
77.803	-64.453	-65.918	-66.65	-66.284	-66.406	-22.827	-66.528	-22.461	77.803	0.857	1.162	1.315	1.01	1.162	0.399	0.857	0.704
78.003	-64.453	-65.918	-66.65	-66.284	-66.406	-22.949	-66.528	-22.583	78.003	1.086	1.162	1.01	1.467	1.162	0.399	1.01	0.323
78.203	-64.453	-65.918	-66.65	-66.284	-66.406	-22.949	-66.528	-22.705	78.203	1.086	1.162	0.857	1.925	1.162	0.781	0.857	0.018
78.403	-64.453	-65.918	-66.65	-66.284	-66.406	-23.071	-66.528	-22.827	78.403	0.781	1.162	0.781	1.925	1.162	1.086	0.704	0.018
78.603	-64.453	-65.918	-66.65	-66.284	-66.406	-23.315	-66.528	-22.949	78.603	0.323	1.162	0.704	1.544	1.162	1.162	0.857	0.247
78.803	-64.453	-65.918	-66.65	-66.284	-66.406	-23.438	-66.528	-23.071	78.803	0.018	1.162	0.857	1.238	1.162	1.162	1.086	0.399
79.003	-64.453	-65.796	-66.65	-66.284	-66.406	-23.438	-66.528	-23.193	79.003	-0.059	1.086	1.086	1.162	1.162	1.086	1.162	0.247
79.203	-64.453	-65.796	-66.65	-66.284	-66.406	-23.56	-66.528	-23.315	79.203	0.018	0.857	1.162	1.162	1.162	0.857	1.162	0.094
79.403	-64.453	-65.796	-66.65	-66.284	-66.406	-23.682	-66.528	-23.438	79.403	0.323	0.704	1.162	1.162	1.162	0.704	1.086	0.323
79.603	-64.453	-65.918	-66.65	-66.284	-66.406	-23.804	-66.406	-23.56	79.603	0.781	0.857	1.086	1.086	1.162	0.933	0.857	0.704
79.803	-64.453	-65.796	-66.772	-66.284	-66.406	-23.926	-66.528	-23.682	79.803	1.086	1.086	0.781	0.857	1.162	1.391	0.704	0.704
80.003	-64.453	-65.796	-66.772	-66.284	-66.406	-24.048	-66.406	-23.804	80.003	1.086	1.162	0.399	0.704	1.162	1.544	0.857	0.399
80.203	-64.453	-65.918	-66.772	-66.406	-66.406	-24.17	-66.406	-23.926	80.203	0.857	1.162	0.475	0.857	1.162	1.086	1.086	0.323
80.403	-64.453	-65.796	-66.65	-66.284	-66.406	-24.292	-66.406	-24.048	80.403	0.704	1.162	1.162	1.086	1.162	0.475	1.086	0.399
80.603	-64.453	-65.918	-66.772	-66.284	-66.406	-24.414	-66.406	-24.048	80.603	0.781	1.162	1.849	1.162	1.162	0.399	0.857	0.247
80.803	-64.453	-65.796	-66.772	-66.406	-66.406	-24.414	-66.406	-24.292	80.803	0.704	1.086	1.925	1.162	1.162	0.781	0.704	0.094
81.003	-64.331	-65.796	-66.772	-66.284	-66.528	-24.536	-66.406	-24.414	81.003	0.399	0.857	1.544	1.162	1.162	1.086	0.857	0.247
81.203	-64.331	-65.918	-66.772	-66.284	-66.528	-24.658	-66.406	-24.536	81.203	0.399	0.704	1.315	1.162	1.162	1.162	1.162	0.399
81.403	-64.331	-65.918	-66.772	-66.284	-66.528	-24.78	-66.528	-24.658	81.403	0.704	0.933	1.391	1.086	1.162	1.238	1.467	0.323
81.603	-64.453	-65.918	-66.772	-66.284	-66.406	-24.902	-66.406	-24.78	81.603	0.704	1.315	1.315	0.933	1.162	1.467	1.62	0.247
81.803	-64.453	-65.918	-66.772	-66.284	-66.406	-24.902	-66.406	-24.902	81.803	0.323	1.238	1.01	1.01	1.162	1.62	1.467	0.17
82.003	-64.453	-65.918	-66.772	-66.284	-66.406	-25.024	-66.406	-25.024	82.003	0.094	0.704	1.01	1.238	1.162	1.467	1.238	0.094
82.203	-64.453	-65.918	-66.772	-66.284	-66.406	-25.146	-66.406	-25.146	82.203	0.323	0.399	1.315	1.086	1.162	1.238	1.162	0.247
82.403	-64.331	-65.918	-66.772	-66.284	-66.406	-25.269	-66.528	-25.269	82.403	0.704	0.475	1.238	0.781	1.162	1.238	1.086	0.475
82.603	-64.331	-65.918	-66.772	-66.406	-66.528	-25.269	-66.528	-25.269	82.603	0.781	0.552	0.704	0.933	1.162	1.467	0.857	0.552
82.803	-64.331	-65.918	-66.772	-66.284	-66.528	-25.391	-66.528	-25.513	82.803	0.704	0.475	0.399	1.467	1.162	1.62	0.704	0.628
83.003	-64.331	-65.918	-66.772	-66.284	-66.406	-25.513	-66.406	-25.635	83.003	0.857	0.323	0.475	1.925	1.162	1.391	0.857	0.781
83.203	-64.331	-65.918	-66.895	-66.284	-66.406	-25.635	-66.406	-25.757	83.203	1.01	0.399	0.552	1.925	1.238	0.933	1.086	0.781
83.403	-64.331	-65.918	-66.772	-66.284	-66.406	-25.757	-66.528	-25.879	83.403	0.857	0.781	0.552	1.544	1.467	0.704	1.162	0.704
83.603	-64.331	-65.918	-66.772	-66.284	-66.406	-25.879	-66.406	-26.001	83.603	0.628	1.086	0.628	1.238	1.62	0.857	1.162	0.933
83.803	-64.331	-65.918	-66.772	-66.284	-66.406	-25.879	-66.406	-26.123	83.803	0.628	1.162	0.781	1.162	1.544	1.01	1.162	1.391
84.003	-64.331	-65.918	-66.772	-66.284	-66.406	-26.001	-66.406	-26.123	84.003	0.933	1.162	0.781	1.162	1.544	0.857	1.162	1.62
84.203	-64.331	-65.918	-66.772	-66.284	-66.406	-26.123	-66.528	-26.245	84.203	1.238	1.086	0.628	1.162	1.62	0.781	1.162	1.391
84.403	-64.453	-65.918	-66.772	-66.284	-66.406	-26.245	-66.406	-26.367	84.403	1.086	0.781	0.475	1.162	1.467	1.162	1.162	0.933
84.603	-64.453	-65.918	-66.772	-66.284	-66.406	-26.367	-66.406	-26.489	84.603	0.781	0.399	0.323	1.162	1.238	1.467	1.238	0.704
84.803	-64.453	-65.918	-66.65	-66.284	-66.406	-26.489	-66.406	-26.733	84.803	0.857	0.399	0.399	1.086	1.162	1.086	1.467	0.857
85.003	-64.331	-65.918	-66.772	-66.284	-66.406	-26.611	-66.406	-26.855	85.003	1.01	0.781	0.704	0.857	1.162	0.475	1.696	1.086
85.203	-64.331	-65.918	-66.772	-66.284	-66.406	-26.733	-66.406	-26.855	85.203	0.857	1.01	0.704	0.704	1.238	0.399	1.772	1.162
85.403	-64.331	-65.918	-66.772	-66.284	-66.406	-26.733	-66.406	-26.978	85.403	0.704	0.781	0.323	0.857	1.467	0.781	1.772	1.238
85.603	-64.453	-65.918	-66.772	-66.406	-66.528	-26.855	-66.406	-27.1	85.603	0.857	0.399	0.094	1.086	1.62	1.086	1.772	1.467
85.803	-64.453	-65.918	-66.772	-66.406	-66.528	-26.978	-66.406	-27.222	85.803	1.01	0.323	0.323	1.162	1.467	1.162	1.696	1.62
86.003	-64.453	-65.918	-66.772	-66.284	-66.406	-27.1	-66.406	-27.344	86.003	0.857	0.475	0.704	1.238	1.238	1.162	1.467	1.467
86.203	-64.331	-65.918	-66.772	-66.284	-66.406	-27.222	-66.406	-27.466	86.203	0.628	0.552	0.704	1.467	1.162	1.086	1.315	1.162
86.403	-64.453	-65.918	-66.772	-66.406	-66.528	-27.344	-66.406	-27.588	86.403	0.552	0.552	0.399	1.62	1.162	0.857	1.391	0.857
86.603	-64.331	-65.796	-66.772	-66.284	-66.406	-27.344	-66.406	-27.71	86.603	0.552	0.628	0.399	1.467	1.162	0.704	1.315	0.704
86.803	-64.453	-65.796	-66.772	-66.406	-66.406	-27.588	-66.528	-27.832	86.803	0.475	0.781	0.781	1.238	1.162	0.857	1.01	0.781
87.003	-64.331	-65.918	-66.772	-66.284	-66.406	-27.588	-66.406	-27.832	87.003	0.323	0.704	1.086	1.086	1.162	1.086	0.933	0.704
87.203	-64.331	-65.918	-66.772	-66.284	-66.528	-27.71	-66.528	-27.954	87.203	0.399	0.323	1.162	0.781	1.162	1.162	1.086	0.399
87.403	-64.331	-65.918	-66.772	-66.284	-66.406	-27.832	-66.406	-28.076	87.403	0.781	0.094	1.086	0.323	1.162	1.086	1.162	0.399
87.603	-64.331	-65.918	-66.772	-66.284	-66.406	-27.832	-66.528	-28.198	87.603	1.086	0.323	0.781	0.094	1.162	0.933	1.162	0.704
87.803	-64.331	-65.918	-66.772	-66.406	-66.406	-27.954	-66.528	-28.32	87.803	1.162	0.704	0.399	0.323	1.086	1.086	1.086	0.704
88.003	-64.331	-65.918	-66.772	-66.406	-66.406	-28.076	-66.528	-28.564	88.003	1.162	0.704	0.323	0.781	0.781	1.62	0.781	0.399
88.203	-64.331	-65.918	-66.772	-66.284	-66.406	-28.076	-66.528	-28.564	88.203	1.162	0.399	0.475	1.086	0.399	1.772	0.399	0.399
88.403	-64.331	-66.04	-66.772	-66.284	-66.528	-28.198	-66.528	-28.687	88.403	1.162	0.399	0.628	1.086	0.399	1.238	0.399	0.704
88.603	-64.331	-66.04	-66.772	-66.284	-66.528	-28.32	-66.528	-28.809	88.603	1.162	0.781	0.857	0.857	0.781	0.781	0.781	0.781
88.803	-64.331	-65.918	-66.772	-66.284	-66.528	-28.442	-66.406	-28.931	88.803	1.238	1.086	1.086	0.628	1.086	0.781	1.086	0.628
89.003	-64.331	-66.04	-66.772	-66.284	-66.528	-28.564	-66.528	-28.931	89.003	1.544	1.162	1.162	0.552	1.162	0.781	1.162	0.552
89.203	-64.331	-65.918	-66.895	-66.284	-66.528	-28.564	-66.406	-29.175	89.203	1.925	1.238	1.086	0.552	1.162	0.704	1.086	0.552
89.403	-64.331	-66.04	-66.895	-66.284	-66.406	-28.687	-66.406	-29.297	89.403	1.925	1.467	0.857	0.552	1.086	0.857	0.857	0.475
89.603	-64.331	-65.918	-66.772	-66.284	-66.528	-28.809	-66.406	-29.419	89.603	1.62	1.62	0.628	0.628	0.781	1.086	0.704	0.323
89.803	-64.331	-66.04	-66.772	-66.284	-66.528	-28.931	-66.528	-29.541	89.803	1.544	1.467	0.552	0.857	0.399	1.086	0.857	0.399
90.003	-64.209	-65.918	-66.772	-66.284	-66.528	-29.053	-66.528	-29.663	90.003	1.62	1.315	0.628	1.01	0.399	0.781	1.162	0.857
90.203	-64.331	-65.918	-66.772	-66.284	-66.528	-29.053	-66.528	-29.785	90.203	1.467	1.391	0.781	0.857	0.704	0.323	1.391	1.315
90.403	-64.331	-65.918	-66.772	-66.284	-66.406	-29.175	-66.528	-29.785	90.403	1.238	1.238	0.704	0.628	0.704	0.018	1.315	1.238
90.603	-64.453	-66.04	-66.772	-66.284	-66.528	-29.297	-66.406	-29.907	90.603	1.238	0.704	0.475	0.475	0.323	-0.059	1.086	0.704
90.803	-64.331	-66.04	-66.772	-66.162	-66.528	-29.419	-66.528	-30.029	90.803	1.391	0.552	0.704	0.323	0.094	0.018	1.238	0.475
91.003	-64.331	-66.04	-66.772	-66.284	-66.406	-29.419	-66.406	-30.151	91.003	1.238	1.086	1.162	0.399	0.323	0.247	1.62	0.781
91.203	-64.331	-65.918	-66.772	-66.284	-66.406	-29.663	-66.528	-30.151	91.203	0.704	1.544	1.086	0.781	0.704	0.475	1.772	1.086
91.403	-64.331	-65.918	-66.65	-66.284	-66.406	-29.663	-66.406	-30.273	91.403	0.475	1.391	0.781	1.01	0.781	0.628	1.696	1.162
91.603	-64.331	-66.04	-66.772	-66.284	-66.528	-29.907	-66.528	-30.396	91.603	0.781	0.933	0.857	0.781	0.704	0.781	1.467	1.238
91.803	-64.331	-65.918	-66.772	-66.284	-66.406	-30.029	-66.528	-30.518	91.803	1.086	0.781	1.086	0.399	0.857	0.781	1.238	1.391
92.003	-64.331	-65.918	-66.65	-66.284	-66.528	-30.029	-66.406	-30.64	92.003	1.162	1.238	1.162	0.475	1.086	0.704	1.086	1.315
92.203	-64.331	-65.796	-66.772	-66.284	-66.528	-30.151	-66.406	-30.64	92.203	1.162	1.925	1.162	1.086	1.162	0.857	0.857	1.01
92.403	-64.331	-65.918	-66.65	-66.162	-66.406	-30.273	-66.528	-30.762	92.403	1.162	2.23	1.162	1.544	1.162	1.01	0.781	0.933
92.603	-64.331	-65.918	-66.772	-66.162	-66.528	-30.396	-66.528	-30.884	92.603	1.238	2.001	1.162	1.391	1.162	0.781	1.162	1.01
92.803	-64.331	-65.918	-66.772	-66.284	-66.528	-30.396	-66.528	-31.006	92.803	1.391	1.544	1.162	0.933	1.086	0.323	1.467	0.781
93.003	-64.331	-65.918	-66.772	-66.162	-66.406	-30.518	-66.406	-31.128	93.003	1.315	1.238	1.162	0.781	0.781	0.018	1.162	0.323
93.203	-64.331	-65.918	-66.772	-66.162	-66.528	-30.64	-66.406	-31.128	93.203	1.086	1.162	1.162	1.162	0.399	-0.059	0.781	0.094
93.403	-64.331	-65.918	-66.772	-66.162	-66.528	-30.64	-66.406	-31.25	93.403	1.238	1.162	1.162	1.544	0.323	-0.059	0.857	0.323
93.603	-64.331	-65.918	-66.772	-66.284	-66.528	-30.762	-66.528	-31.372	93.603	1.544	1.162	1.162	1.467	0.475	-0.059	1.01	0.704
93.803	-64.331	-65.796	-66.772	-66.284	-66.528	-30.762	-66.528	-31.616	93.803	1.391	1.162	1.162	1.238	0.552	-0.059	0.857	0.704
94.003	-64.331	-65.918	-66.772	-66.162	-66.528	-31.006	-66.528	-31.616	94.003	0.933	1.162	1.162	1.162	0.475	0.018	0.628	0.323
94.203	-64.331	-65.918	-66.772	-66.162	-66.528	-31.128	-66.528	-31.738	94.203	0.704	1.162	1.238	1.162	0.323	0.247	0.552	0.094
94.403	-64.331	-65.918	-66.772	-66.162	-66.528	-31.128	-66.528	-31.86	94.403	0.933	1.238	1.544	1.238	0.399	0.399	0.552	0.247
94.603	-64.331	-65.918	-66.772	-66.162	-66.528	-31.25	-66.528	-31.982	94.603	1.467	1.467	1.925	1.467	0.704	0.323	0.552	0.399
94.803	-64.331	-65.918	-66.772	-66.162	-66.528	-31.372	-66.406	-32.104	94.803	1.925	1.62	2.001	1.696	0.704	0.399	0.552	0.323
95.003	-64.331	-65.918	-66.772	-66.162	-66.528	-31.372	-66.528	-32.104	95.003	1.925	1.391	1.849	1.696	0.399	0.628	0.475	0.399
95.203	-64.331	-66.04	-66.772	-66.162	-66.528	-31.494	-66.406	-32.227	95.203	1.62	0.933	1.696	1.391	0.399	0.399	0.323	0.704
95.403	-64.331	-66.04	-66.895	-66.162	-66.528	-31.616	-66.528	-32.471	95.403	1.544	0.704	1.391	0.933	0.781	-0.059	0.323	0.781
95.603	-64.331	-65.918	-66.772	-66.162	-66.406	-31.738	-66.528	-32.471	95.603	1.62	0.933	0.857	0.628	1.01	0.018	0.399	0.628
95.803	-64.331	-66.04	-66.772	-66.284	-66.406	-31.738	-66.406	-32.593	95.803	1.467	1.391	0.399	0.628	0.781	0.323	0.247	0.475
96.003	-64.331	-65.918	-66.772	-66.162	-66.528	-31.738	-66.528	-32.715	96.003	1.315	1.696	0.475	0.857	0.399	0.247	0.018	0.323
96.203	-64.331	-66.04	-66.772	-66.162	-66.406	-31.982	-66.528	-32.715	96.203	1.467	1.772	1.086	1.086	0.399	0.094	-0.059	0.323
96.404	-64.331	-65.918	-66.895	-66.162	-66.528	-32.104	-66.528	-32.837	96.404	1.62	1.696	1.544	1.162	0.781	0.323	0.018	0.475
96.604	-64.331	-66.04	-66.772	-66.162	-66.528	-32.104	-66.528	-33.081	96.604	1.467	1.467	1.467	1.162	1.01	0.704	0.247	0.628
96.804	-64.331	-65.918	-66.895	-66.162	-66.406	-32.227	-66.528	-33.081	96.804	1.238	1.238	1.238	1.162	0.857	0.704	0.475	0.857
97.004	-64.331	-65.918	-66.772	-66.162	-66.528	-32.349	-66.528	-33.203	97.004	1.086	1.162	1.162	1.162	0.704	0.323	0.628	1.086
97.204	-64.331	-65.918	-66.895	-66.162	-66.406	-32.349	-66.528	-33.325	97.204	0.781	1.162	1.086	1.238	0.933	0.094	0.781	1.162
97.404	-64.331	-65.918	-66.772	-66.04	-66.406	-32.471	-66.406	-33.447	97.404	0.323	1.162	0.933	1.544	1.391	0.323	0.704	1.086
97.604	-64.453	-65.918	-66.895	-66.04	-66.406	-32.593	-66.406	-33.569	97.604	0.094	1.162	1.086	1.925	1.62	0.781	0.399	0.933
97.804	-64.331	-65.918	-66.772	-66.04	-66.406	-32.715	-66.528	-33.569	97.804	0.323	1.162	1.62	1.925	1.467	1.086	0.475	1.01
98.004	-64.331	-65.918	-66.895	-66.04	-66.528	-32.715	-66.528	-33.813	98.004	0.704	1.238	1.925	1.544	1.238	1.162	1.086	1.238
98.204	-64.331	-65.918	-66.895	-66.04	-66.406	-32.837	-66.528	-33.813	98.204	0.781	1.467	1.772	1.238	1.162	1.162	1.467	1.086
98.404	-64.331	-65.918	-66.772	-66.04	-66.406	-32.959	-66.528	-33.936	98.404	0.704	1.62	1.391	1.162	1.238	1.162	1.162	0.781
98.604	-64.331	-65.918	-66.772	-66.162	-66.528	-32.959	-66.528	-34.058	98.604	0.781	1.467	1.01	1.086	1.467	1.086	0.781	0.781
98.804	-64.331	-65.796	-66.895	-66.04	-66.406	-33.081	-66.528	-34.18	98.804	0.781	1.315	0.857	0.857	1.62	0.781	0.857	0.781
99.004	-64.331	-65.918	-66.895	-66.04	-66.406	-33.203	-66.528	-34.302	99.004	0.628	1.467	0.781	0.704	1.467	0.399	1.086	0.704
99.204	-64.331	-65.918	-66.772	-66.04	-66.528	-33.325	-66.528	-34.302	99.204	0.552	1.62	0.704	0.857	1.238	0.399	1.162	0.781
99.404	-64.453	-65.796	-66.772	-66.04	-66.528	-33.325	-66.528	-34.424	99.404	0.628	1.391	0.857	1.01	1.162	0.704	1.162	0.781
99.604	-64.331	-65.918	-66.772	-66.04	-66.528	-33.447	-66.528	-34.546	99.604	0.857	0.933	1.162	0.857	1.238	0.781	1.086	0.704
99.804	-64.331	-65.918	-66.895	-66.04	-66.528	-33.447	-66.528	-34.546	99.804	1.086	0.704	1.467	0.704	1.467	0.704	0.857	0.857
100.004	-64.331	-65.918	-66.895	-66.04	-66.528	-33.569	-66.528	-34.668	100.004	1.086	0.857	1.62	0.857	1.696	0.781	0.628	1.01
100.204	-64.331	-65.918	-66.895	-66.04	-66.406	-33.691	-66.528	-34.79	100.204	0.857	1.086	1.467	1.086	1.772	0.781	0.552	0.857
100.404	-64.331	-65.918	-66.895	-66.04	-66.406	-33.813	-66.528	-34.912	100.404	0.704	1.086	1.315	1.162	1.696	0.704	0.628	0.704
100.604	-64.331	-65.918	-66.895	-66.04	-66.406	-33.813	-66.528	-35.034	100.604	0.781	0.781	1.467	1.162	1.467	0.857	0.857	0.781
100.804	-64.331	-65.918	-66.895	-66.162	-66.406	-33.936	-66.528	-35.156	100.804	0.781	0.323	1.62	1.162	1.238	1.086	1.086	0.781
101.004	-64.331	-65.918	-66.895	-66.162	-66.406	-34.058	-66.528	-35.278	101.004	0.704	0.018	1.391	1.162	1.162	1.162	1.162	0.628
101.204	-64.331	-65.918	-66.895	-66.04	-66.406	-34.058	-66.65	-35.278	101.204	0.857	0.018	0.933	1.162	1.162	1.086	1.238	0.475
101.404	-64.331	-65.918	-66.895	-66.162	-66.528	-34.18	-66.528	-35.4	101.404	1.086	0.323	0.704	1.162	1.162	0.857	1.467	0.247
101.604	-64.331	-65.918	-66.895	-66.04	-66.528	-34.302	-66.528	-35.522	101.604	1.086	0.781	0.857	1.162	1.162	0.704	1.62	0.094
101.804	-64.331	-65.918	-66.895	-66.04	-66.406	-34.302	-66.528	-35.645	101.804	0.857	1.086	1.086	1.162	1.162	0.857	1.544	0.247
102.004	-64.331	-66.04	-66.895	-66.162	-66.528	-34.424	-66.528	-35.767	102.004	0.704	1.086	1.162	1.162	1.086	1.086	1.62	0.475
102.204	-64.453	-66.04	-66.895	-66.162	-66.406	-34.546	-66.528	-35.767	102.204	0.781	0.857	1.162	1.162	0.857	1.238	1.925	0.628
102.404	-64.453	-66.04	-66.895	-66.162	-66.406	-34.668	-66.528	-36.011	102.404	0.781	0.628	1.162	1.162	0.704	1.467	1.925	0.857
102.604	-64.453	-65.918	-66.895	-66.162	-66.528	-34.79	-66.528	-36.011	102.604	0.628	0.552	1.162	1.162	0.857	1.696	1.544	1.086
102.804	-64.453	-65.918	-66.895	-66.162	-66.406	-34.79	-66.528	-36.133	102.804	0.552	0.628	1.162	1.162	1.086	1.772	1.238	1.162
103.004	-64.331	-65.918	-66.895	-66.04	-66.528	-34.912	-66.528	-36.255	103.004	0.628	0.857	1.162	1.162	1.162	1.696	1.238	1.162
103.204	-64.331	-65.918	-66.895	-66.162	-66.406	-35.034	-66.65	-36.255	103.204	0.781	1.01	1.162	1.162	1.162	1.391	1.544	1.162
103.404	-64.331	-65.918	-66.895	-66.04	-66.406	-35.034	-66.65	-36.377	103.404	0.704	0.857	1.162	1.162	1.086	0.933	1.925	1.162
103.604	-64.331	-65.918	-66.895	-66.04	-66.406	-35.278	-66.528	-36.499	103.604	0.323	0.628	1.162	1.162	0.857	0.704	2.001	1.162
103.804	-64.331	-65.918	-66.895	-66.04	-66.406	-35.278	-66.528	-36.743	103.804	0.094	0.475	1.162	1.162	0.704	0.857	1.849	1.162
104.004	-64.331	-65.918	-66.772	-66.04	-66.406	-35.4	-66.65	-36.743	104.004	0.323	0.323	1.162	1.162	0.857	1.086	1.772	1.162
104.204	-64.331	-65.796	-66.772	-66.162	-66.406	-35.4	-66.65	-36.865	104.204	0.704	0.323	1.086	1.086	1.086	1.162	1.772	1.162
104.404	-64.453	-65.796	-66.772	-66.04	-66.528	-35.522	-66.528	-36.987	104.404	0.781	0.475	0.781	0.857	1.162	1.162	1.772	1.162
104.604	-64.453	-65.796	-66.895	-66.04	-66.528	-35.645	-66.528	-36.987	104.604	0.704	0.628	0.399	0.704	1.238	1.162	1.772	1.162
104.804	-64.453	-65.796	-66.895	-66.162	-66.528	-35.645	-66.528	-37.109	104.804	0.857	0.857	0.399	0.857	1.544	1.086	1.696	1.162
105.004	-64.331	-65.918	-66.895	-66.162	-66.528	-35.767	-66.65	-37.231	105.004	1.01	1.086	0.781	1.086	1.925	0.781	1.391	1.162
105.204	-64.453	-65.918	-66.772	-66.162	-66.528	-35.889	-66.65	-37.354	105.204	0.781	1.086	1.086	1.162	1.925	0.475	0.857	1.162
105.404	-64.331	-65.796	-66.895	-66.162	-66.528	-36.011	-66.65	-37.476	105.404	0.399	0.781	1.086	1.162	1.544	0.704	0.399	1.162
105.604	-64.331	-65.918	-66.895	-66.162	-66.528	-36.011	-66.65	-37.598	105.604	0.399	0.399	0.857	1.162	1.315	1.162	0.399	1.162
105.804	-64.331	-65.796	-66.895	-66.162	-66.528	-36.133	-66.65	-37.598	105.804	0.704	0.323	0.628	1.086	1.467	1.086	0.781	1.162
106.004	-64.331	-65.796	-66.895	-66.04	-66.528	-36.255	-66.65	-37.72	106.004	0.781	0.475	0.475	0.857	1.62	0.781	1.086	1.238
106.204	-64.331	-65.918	-67.017	-66.162	-66.528	-36.377	-66.65	-37.842	106.204	0.628	0.628	0.247	0.704	1.467	0.781	1.162	1.467
106.404	-64.331	-65.918	-66.895	-66.162	-66.528	-36.377	-66.65	-37.964	106.404	0.552	0.857	0.094	0.781	1.238	0.781	1.162	1.62
106.604	-64.331	-65.918	-66.895	-66.162	-66.528	-36.499	-66.528	-38.086	106.604	0.628	1.162	0.399	0.704	1.162	0.628	1.162	1.467
106.804	-64.331	-65.796	-66.895	-66.162	-66.528	-36.621	-66.65	-38.086	106.804	0.857	1.467	1.086	0.399	1.162	0.552	1.162	1.238
107.004	-64.331	-65.918	-66.895	-66.162	-66.528	-36.621	-66.65	-38.208	107.004	1.01	1.62	1.467	0.399	1.162	0.628	1.162	1.162
107.204	-64.331	-65.918	-66.895	-66.162	-66.528	-36.743	-66.528	-38.33	107.204	0.857	1.391	1.238	0.704	1.162	0.857	1.162	1.238
107.404	-64.331	-65.918	-66.895	-66.162	-66.528	-36.743	-66.65	-38.452	107.404	0.704	0.933	1.086	0.704	1.086	1.086	1.238	1.467
107.604	-64.331	-65.918	-66.895	-66.162	-66.528	-36.865	-66.65	-38.452	107.604	0.857	0.704	1.238	0.399	0.857	1.162	1.544	1.62
107.804	-64.331	-65.918	-66.895	-66.162	-66.528	-36.987	-66.528	-38.696	107.804	1.086	0.857	1.086	0.475	0.704	1.162	1.925	1.391
108.004	-64.331	-65.918	-66.895	-66.162	-66.528	-36.987	-66.528	-38.696	108.004	1.162	1.01	0.781	1.01	0.781	1.162	1.925	0.933
108.204	-64.331	-65.918	-66.895	-66.162	-66.528	-37.109	-66.65	-38.818	108.204	1.238	0.781	0.857	1.238	0.781	1.162	1.544	0.704
108.404	-64.453	-65.918	-66.772	-66.162	-66.528	-37.231	-66.65	-38.94	108.404	1.391	0.399	1.086	1.01	0.704	1.162	1.238	0.857
108.604	-64.331	-65.918	-66.772	-66.162	-66.528	-37.231	-66.65	-38.94	108.604	1.315	0.399	1.162	0.933	0.857	1.238	1.162	1.01
108.804	-64.453	-65.918	-66.772	-66.162	-66.65	-37.354	-66.65	-39.062	108.804	1.01	0.704	1.086	1.086	1.01	1.467	1.162	0.857
109.004	-64.331	-65.918	-66.895	-66.162	-66.528	-37.476	-66.65	-39.185	109.004	0.933	0.781	0.857	1.162	0.781	1.62	1.162	0.704
109.204	-64.331	-65.918	-66.772	-66.162	-66.528	-37.476	-66.65	-39.307	109.204	1.086	0.704	0.704	1.162	0.399	1.391	1.238	0.857
109.404	-64.331	-65.918	-66.895	-66.04	-66.528	-37.598	-66.65	-39.429	109.404	1.162	0.857	0.857	1.162	0.399	0.933	1.467	1.086
109.604	-64.331	-65.918	-66.772	-66.162	-66.528	-37.72	-66.65	-39.551	109.604	1.162	1.086	1.01	1.162	0.781	0.704	1.696	1.162
109.804	-64.331	-65.796	-66.772	-66.162	-66.528	-37.842	-66.65	-39.673	109.804	1.238	1.162	0.781	1.162	1.01	0.857	1.772	1.162
110.004	-64.331	-65.796	-66.895	-66.162	-66.528	-37.964	-66.65	-39.673	110.004	1.467	1.162	0.399	1.162	0.857	1.01	1.696	1.162
110.204	-64.331	-65.796	-66.895	-66.04	-66.528	-37.964	-66.65	-39.795	110.204	1.62	1.162	0.323	1.086	0.628	0.857	1.467	1.162
110.404	-64.331	-65.796	-66.895	-66.04	-66.528	-38.086	-66.528	-39.917	110.404	1.467	1.162	0.475	0.857	0.552	0.704	1.238	1.162
110.604	-64.331	-65.796	-66.895	-66.162	-66.528	-38.086	-66.65	-40.039	110.604	1.315	1.162	0.628	0.704	0.628	0.781	1.162	1.162
110.804	-64.331	-65.918	-66.895	-66.04	-66.528	-38.208	-66.65	-40.039	110.804	1.544	1.162	0.857	0.857	0.781	0.704	1.162	1.162
111.004	-64.331	-65.796	-66.895	-66.04	-66.528	-38.33	-66.65	-40.161	111.004	1.925	1.162	1.086	1.086	0.781	0.323	1.162	1.238
111.204	-64.331	-65.796	-66.895	-66.162	-66.528	-38.452	-66.65	-40.283	111.204	1.925	1.238	1.086	1.162	0.628	0.094	1.162	1.467
111.404	-64.331	-65.796	-66.895	-66.04	-66.528	-38.452	-66.772	-40.283	111.404	1.544	1.467	0.933	1.086	0.475	0.323	1.162	1.62
111.604	-64.331	-65.918	-66.895	-66.162	-66.528	-38.452	-66.772	-40.527	111.604	1.238	1.62	1.01	0.857	0.247	0.781	1.162	1.467
111.804	-64.331	-65.796	-66.895	-66.162	-66.528	-38.574	-66.65	-40.649	111.804	1.238	1.544	1.391	0.704	0.094	1.086	1.238	1.238
112.004	-64.331	-65.918	-66.895	-66.162	-66.528	-38.696	-66.65	-40.649	112.004	1.467	1.62	1.696	0.933	0.323	1.086	1.391	1.086
112.204	-64.331	-65.918	-66.895	-66.162	-66.528	-38.696	-66.65	-40.771	112.204	1.544	2.001	1.62	1.315	0.781	0.857	1.238	0.857
112.404	-64.331	-65.796	-66.895	-66.162	-66.528	-38.818	-66.65	-40.894	112.404	1.162	2.23	1.162	1.315	1.086	0.628	0.704	0.628
112.604	-64.453	-65.796	-66.895	-66.162	-66.528	-38.94	-66.65	-41.016	112.604	0.781	2.078	0.781	0.933	1.086	0.552	0.475	0.552
112.804	-64.453	-65.918	-66.895	-66.162	-66.528	-39.062	-66.65	-41.016	112.804	0.781	1.925	0.933	0.552	0.857	0.552	0.704	0.628
113.004	-64.331	-65.918	-66.895	-66.04	-66.528	-39.185	-66.65	-41.138	113.004	0.781	1.925	1.391	0.323	0.628	0.552	0.704	0.704
113.204	-64.331	-65.796	-66.895	-66.04	-66.528	-39.185	-66.65	-41.382	113.204	0.781	1.62	1.62	0.399	0.475	0.552	0.399	0.475
113.404	-64.453	-65.918	-66.895	-66.162	-66.528	-39.185	-66.65	-41.382	113.404	1.162	1.086	1.467	0.781	0.247	0.552	0.399	0.17
113.604	-64.453	-65.918	-66.895	-66.04	-66.528	-39.307	-66.65	-41.504	113.604	1.544	1.01	1.238	1.086	0.094	0.552	0.781	0.247
113.804	-64.331	-65.918	-66.895	-66.04	-66.528	-39.429	-66.65	-41.504	113.804	1.391	1.391	1.162	1.162	0.323	0.475	1.01	0.552
114.004	-64.453	-65.918	-66.895	-66.04	-66.528	-39.429	-66.65	-41.626	114.004	0.933	1.62	1.162	1.162	0.704	0.247	0.857	0.857
114.204	-64.331	-65.796	-66.895	-66.04	-66.65	-39.551	-66.65	-41.748	114.204	0.704	1.467	1.238	1.162	0.704	0.094	0.704	1.162
114.404	-64.453	-65.918	-66.772	-66.04	-66.65	-39.551	-66.65	-41.748	114.404	0.857	1.238	1.544	1.162	0.399	0.247	0.857	1.467
114.604	-64.453	-65.796	-66.772	-66.04	-66.528	-39.673	-66.65	-41.87	114.604	1.086	1.162	1.925	1.238	0.399	0.475	1.01	1.62
114.804	-64.331	-65.918	-66.772	-65.918	-66.528	-39.673	-66.65	-41.992	114.804	1.162	1.162	1.925	1.467	0.704	0.628	0.781	1.467
115.004	-64.331	-65.918	-66.772	-65.918	-66.65	-39.917	-66.65	-42.114	115.004	1.162	1.162	1.544	1.62	0.781	0.857	0.399	1.162
115.204	-64.331	-65.918	-66.772	-65.918	-66.528	-39.917	-66.65	-42.236	115.204	1.162	1.162	1.238	1.467	0.704	1.01	0.399	0.857
115.404	-64.331	-65.918	-66.895	-66.04	-66.528	-40.039	-66.65	-42.236	115.404	1.162	1.238	1.238	1.238	0.857	0.781	0.781	0.628
115.604	-64.453	-65.918	-66.772	-66.04	-66.528	-40.039	-66.65	-42.48	115.604	1.162	1.467	1.467	1.162	1.086	0.399	1.01	0.475
115.804	-64.331	-65.796	-66.772	-66.04	-66.528	-40.161	-66.65	-42.48	115.804	1.162	1.62	1.62	1.162	1.162	0.399	0.781	0.247
116.004	-64.331	-65.796	-66.772	-66.04	-66.528	-40.283	-66.65	-42.603	116.004	1.238	1.467	1.467	1.162	1.162	0.704	0.399	0.094
116.204	-64.331	-65.918	-66.895	-65.918	-66.528	-40.405	-66.65	-42.725	116.204	1.544	1.238	1.238	1.162	1.086	0.781	0.399	0.323
116.404	-64.331	-65.918	-66.895	-65.918	-66.528	-40.405	-66.772	-42.725	116.404	1.925	1.238	1.162	1.162	0.857	0.628	0.781	0.781
116.604	-64.331	-65.796	-66.895	-66.04	-66.528	-40.527	-66.65	-42.847	116.604	1.925	1.467	1.162	1.162	0.704	0.552	1.01	1.01
116.804	-64.331	-65.918	-66.895	-66.04	-66.528	-40.649	-66.772	-42.969	116.804	1.544	1.62	1.238	1.162	0.857	0.552	0.857	0.857
117.004	-64.331	-65.796	-66.895	-66.04	-66.528	-40.771	-66.772	-42.969	117.004	1.162	1.467	1.544	1.162	1.086	0.475	0.704	0.704
117.204	-64.331	-65.796	-67.017	-66.04	-66.528	-40.771	-66.772	-43.091	117.204	0.781	1.238	1.925	1.238	1.162	0.323	0.781	0.781
117.404	-64.331	-65.796	-67.017	-66.04	-66.528	-40.894	-66.65	-43.213	117.404	0.323	1.238	1.925	1.467	1.086	0.323	0.781	0.704
117.604	-64.331	-65.796	-67.017	-66.04	-66.528	-41.016	-66.65	-43.335	117.604	0.094	1.391	1.544	1.62	0.857	0.475	0.704	0.399
117.804	-64.331	-65.796	-67.017	-66.04	-66.528	-41.016	-66.65	-43.457	117.804	0.399	1.391	1.238	1.467	0.704	0.552	0.857	0.399
118.004	-64.331	-65.918	-67.017	-66.04	-66.528	-41.138	-66.65	-43.457	118.004	1.01	1.315	1.162	1.315	0.857	0.475	1.086	0.781
118.204	-64.331	-65.796	-67.017	-66.04	-66.406	-41.26	-66.65	-43.579	118.204	1.238	1.391	1.162	1.544	1.086	0.247	1.086	1.01
118.404	-64.331	-65.796	-67.017	-66.04	-66.528	-41.26	-66.65	-43.701	118.404	1.01	1.391	1.162	1.849	1.162	0.094	0.857	0.781
118.604	-64.331	-65.796	-67.017	-66.04	-66.406	-41.382	-66.772	-43.823	118.604	0.933	1.238	1.238	1.62	1.162	0.247	0.628	0.399
118.804	-64.331	-65.918	-67.017	-66.04	-66.406	-41.504	-66.65	-43.945	118.804	1.086	1.162	1.467	1.086	1.162	0.399	0.475	0.323
119.004	-64.331	-65.796	-67.017	-66.04	-66.406	-41.626	-66.65	-43.945	119.004	1.162	1.162	1.62	0.933	1.162	0.323	0.323	0.475
119.204	-64.331	-65.918	-67.017	-65.918	-66.406	-41.626	-66.65	-44.067	119.204	1.086	1.162	1.467	1.01	1.162	0.399	0.399	0.628
119.404	-64.331	-65.796	-67.017	-66.04	-66.406	-41.748	-66.65	-44.189	119.404	0.857	1.086	1.315	0.857	1.162	0.781	0.781	0.857
119.604	-64.331	-65.918	-67.017	-66.04	-66.406	-41.87	-66.528	-44.189	119.604	0.704	0.857	1.467	0.704	1.162	1.01	1.01	1.086
119.804	-64.331	-65.796	-67.017	-66.04	-66.406	-41.87	-66.528	-44.312	119.804	0.781	0.704	1.62	0.857	1.238	0.857	0.781	1.086
120.004	-64.331	-65.796	-67.017	-66.04	-66.406	-41.992	-66.528	-44.434	120.004	0.704	0.857	1.467	1.086	1.467	0.704	0.399	0.781
120.204	-64.331	-65.796	-66.895	-66.04	-66.406	-42.114	-66.528	-44.556	120.204	0.323	1.01	1.238	1.086	1.62	0.857	0.399	0.323
120.404	-64.331	-65.796	-66.895	-66.04	-66.528	-42.114	-66.65	-44.678	120.404	0.018	0.857	1.162	0.857	1.467	1.086	0.781	0.17
120.604	-64.331	-65.796	-66.895	-66.04	-66.528	-42.114	-66.65	-44.678	120.604	0.018	0.704	1.162	0.704	1.238	1.162	1.086	0.552
120.804	-64.331	-65.796	-66.895	-66.04	-66.528	-42.236	-66.65	-44.8	120.804	0.323	0.781	1.162	0.933	1.162	1.238	1.086	0.857
121.004	-64.331	-65.796	-66.895	-66.04	-66.528	-42.358	-66.65	-44.922	121.004	0.704	0.704	1.162	1.391	1.162	1.391	0.857	0.628
121.204	-64.209	-65.796	-66.895	-66.04	-66.528	-42.48	-66.65	-44.922	121.204	0.781	0.399	1.162	1.544	1.086	1.315	0.704	0.475
121.404	-64.331	-65.796	-66.895	-66.04	-66.406	-42.48	-66.65	-44.922	121.404	0.704	0.323	1.162	1.162	0.857	1.01	0.857	0.704
121.604	-64.331	-65.796	-66.895	-66.04	-66.528	-42.48	-66.65	-45.166	121.604	0.781	0.475	1.162	0.781	0.781	0.933	1.086	0.704
121.804	-64.331	-65.918	-66.895	-66.04	-66.528	-42.725	-66.65	-45.166	121.804	0.781	0.552	1.162	0.933	1.162	1.162	1.086	0.399
122.004	-64.331	-65.796	-67.017	-66.04	-66.528	-42.847	-66.65	-45.288	122.004	0.704	0.475	1.086	1.391	1.544	1.467	0.857	0.399
122.204	-64.331	-65.796	-66.895	-66.04	-66.528	-42.847	-66.65	-45.41	122.204	0.857	0.247	0.857	1.544	1.544	1.696	0.704	0.704
122.404	-64.331	-65.796	-67.017	-66.04	-66.528	-42.969	-66.528	-45.532	122.404	1.086	0.094	0.781	1.162	1.544	1.772	0.857	0.781
122.604	-64.209	-65.796	-67.017	-66.04	-66.528	-42.969	-66.65	-45.532	122.604	1.162	0.323	1.162	0.781	1.544	1.772	1.086	0.704
122.804	-64.209	-65.796	-66.895	-66.04	-66.528	-42.969	-66.65	-45.654	122.804	1.086	0.781	1.544	0.857	1.238	1.849	1.162	0.781
123.004	-64.209	-65.796	-67.017	-66.04	-66.528	-43.213	-66.65	-45.776	123.004	0.857	1.01	1.391	1.086	1.086	1.925	1.238	0.781
123.204	-64.331	-65.796	-67.017	-66.04	-66.528	-43.213	-66.65	-45.776	123.204	0.628	0.857	1.01	1.162	1.315	1.62	1.467	0.704
123.404	-64.209	-65.796	-67.017	-66.04	-66.528	-43.335	-66.65	-45.898	123.404	0.475	0.628	1.01	1.162	1.391	1.086	1.696	0.857
123.604	-64.209	-65.796	-67.017	-66.04	-66.528	-43.457	-66.65	-46.021	123.604	0.323	0.475	1.315	1.162	1.238	0.933	1.772	1.086
123.805	-64.209	-65.796	-67.017	-66.162	-66.528	-43.457	-66.65	-46.143	123.805	0.399	0.323	1.391	1.162	1.162	1.086	1.696	1.162
124.005	-64.209	-65.674	-67.017	-66.162	-66.528	-43.579	-66.65	-46.265	124.005	0.781	0.323	1.238	1.162	1.238	1.162	1.467	1.162
124.205	-64.209	-65.796	-67.017	-66.162	-66.528	-43.701	-66.65	-46.265	124.205	1.01	0.475	1.086	1.162	1.391	1.162	1.238	1.086
124.405	-64.209	-65.796	-67.017	-66.04	-66.528	-43.701	-66.65	-46.387	124.405	0.781	0.552	0.781	1.162	1.315	1.238	1.162	0.857
124.605	-64.087	-65.796	-67.139	-66.162	-66.528	-43.823	-66.65	-46.387	124.605	0.399	0.628	0.399	1.162	1.01	1.467	1.162	0.628
124.805	-64.087	-65.796	-67.139	-66.162	-66.528	-43.945	-66.65	-46.387	124.805	0.399	0.933	0.323	1.086	0.933	1.62	1.162	0.552
125.005	-64.209	-65.796	-67.017	-66.162	-66.528	-44.067	-66.65	-46.509	125.005	0.857	1.315	0.475	0.857	1.086	1.391	1.086	0.628
125.205	-64.209	-65.796	-67.017	-66.162	-66.528	-44.067	-66.528	-46.631	125.205	1.391	1.315	0.628	0.628	1.162	0.933	0.857	0.857
125.405	-64.087	-65.796	-67.017	-66.162	-66.528	-44.189	-66.528	-46.753	125.405	1.62	0.857	0.857	0.552	1.162	0.704	0.704	1.086
125.605	-64.209	-65.674	-67.139	-66.162	-66.65	-44.312	-66.65	-46.875	125.605	1.391	0.399	1.086	0.552	1.162	0.857	0.857	1.238
125.805	-64.209	-65.796	-67.139	-66.162	-66.65	-44.312	-66.65	-46.875	125.805	0.933	0.399	1.086	0.552	1.238	1.086	1.086	1.467
126.005	-64.209	-65.796	-67.017	-66.162	-66.65	-44.434	-66.65	-46.997	126.005	0.628	0.704	0.857	0.628	1.391	1.162	1.086	1.62
126.205	-64.209	-65.796	-67.017	-66.04	-66.65	-44.434	-66.528	-47.119	126.205	0.475	0.704	0.704	0.857	1.315	1.086	0.857	1.544
126.405	-64.209	-65.796	-67.017	-66.162	-66.65	-44.556	-66.528	-47.241	126.405	0.247	0.323	0.857	1.01	1.01	0.857	0.704	1.62
126.605	-64.209	-65.674	-67.017	-66.04	-66.65	-44.678	-66.528	-47.363	126.605	0.094	0.094	1.01	0.781	0.933	0.704	0.857	1.925
126.805	-64.209	-65.674	-67.017	-66.162	-66.528	-44.678	-66.65	-47.363	126.805	0.323	0.323	0.781	0.323	1.086	0.857	1.086	2.001
127.005	-64.209	-65.674	-67.017	-66.04	-66.65	-44.8	-66.528	-47.485	127.005	0.704	0.781	0.399	0.094	1.086	1.162	1.162	1.849
127.205	-64.209	-65.674	-67.017	-66.162	-66.65	-44.8	-66.528	-47.485	127.205	0.781	1.086	0.323	0.247	0.933	1.467	1.162	1.696
127.405	-64.209	-65.674	-67.017	-66.162	-66.65	-44.922	-66.65	-47.607	127.405	0.781	1.086	0.475	0.399	1.086	1.544	1.238	1.544
127.605	-64.209	-65.796	-67.017	-66.162	-66.65	-45.044	-66.65	-47.729	127.605	1.162	0.857	0.628	0.323	1.62	1.162	1.467	1.544
127.805	-64.209	-65.796	-67.017	-66.04	-66.65	-45.166	-66.65	-47.852	127.805	1.544	0.628	0.781	0.475	1.849	0.781	1.62	1.544
128.005	-64.209	-65.674	-67.017	-66.04	-66.65	-45.288	-66.65	-47.974	128.005	1.391	0.552	0.704	1.01	1.544	0.857	1.391	1.162
128.205	-64.209	-65.674	-67.017	-66.04	-66.528	-45.288	-66.772	-47.974	128.205	0.933	0.628	0.399	1.162	1.238	1.162	0.933	0.781
128.405	-64.209	-65.796	-67.017	-66.04	-66.528	-45.288	-66.772	-48.096	128.405	0.781	0.857	0.399	0.628	1.162	1.391	0.704	0.857
128.605	-64.209	-65.796	-66.895	-66.04	-66.65	-45.41	-66.65	-48.096	128.605	1.162	1.086	0.781	0.17	1.162	1.315	0.857	1.086
128.805	-64.209	-65.674	-67.017	-66.162	-66.65	-45.41	-66.65	-48.218	128.805	1.62	1.086	1.086	0.323	1.086	0.933	1.162	1.162
129.005	-64.209	-65.796	-67.017	-66.04	-66.65	-45.532	-66.772	-48.34	129.005	1.772	0.781	1.086	0.704	0.781	0.628	1.467	1.162
129.205	-64.209	-65.674	-66.895	-66.04	-66.528	-45.654	-66.772	-48.34	129.205	1.772	0.399	0.857	0.704	0.399	0.552	1.62	1.162
129.405	-64.087	-65.674	-67.017	-66.04	-66.65	-45.776	-66.772	-48.462	129.405	1.772	0.475	0.704	0.399	0.399	0.552	1.391	1.162
129.605	-64.209	-65.674	-67.017	-66.04	-66.65	-45.898	-66.772	-48.584	129.605	1.696	1.01	0.781	0.323	0.704	0.628	0.933	1.162
129.805	-64.087	-65.674	-67.017	-66.162	-66.65	-46.021	-66.772	-48.584	129.805	1.467	1.238	0.781	0.475	0.704	0.857	0.704	1.086
130.005	-64.209	-65.796	-67.017	-66.04	-66.528	-46.021	-66.772	-48.706	130.005	1.238	1.01	0.704	0.552	0.399	1.086	0.933	0.857
130.205	-64.209	-65.674	-67.017	-66.162	-66.65	-46.021	-66.65	-48.828	130.205	1.162	0.933	0.933	0.552	0.399	1.162	1.391	0.704
130.405	-64.087	-65.674	-67.017	-66.162	-66.65	-46.143	-66.65	-48.95	130.405	1.162	1.01	1.315	0.628	0.704	1.162	1.62	0.857
130.605	-64.087	-65.674	-67.017	-66.04	-66.65	-46.265	-66.65	-48.95	130.605	1.162	0.857	1.238	0.857	0.781	1.162	1.467	1.01
130.805	-64.087	-65.674	-67.139	-66.04	-66.65	-46.387	-66.772	-49.072	130.805	1.162	0.704	0.704	1.01	0.704	1.162	1.238	0.857
131.005	-64.087	-65.674	-67.139	-66.04	-66.65	-46.387	-66.772	-49.072	131.005	1.162	0.857	0.475	0.781	0.857	1.162	1.086	0.704
131.205	-64.087	-65.552	-67.139	-66.162	-66.65	-46.509	-66.772	-49.194	131.205	1.162	1.086	0.781	0.399	1.086	1.086	0.857	0.857
131.405	-64.087	-65.674	-67.139	-66.162	-66.772	-46.631	-66.65	-49.316	131.405	1.086	1.086	1.01	0.323	1.086	0.781	0.704	1.086
131.605	-64.087	-65.674	-67.139	-66.162	-66.65	-46.631	-66.65	-49.438	131.605	0.857	0.857	0.857	0.475	0.857	0.399	0.857	1.162
131.805	-64.087	-65.674	-67.017	-66.162	-66.65	-46.753	-66.772	-49.438	131.805	0.704	0.781	0.704	0.552	0.704	0.399	1.086	1.238
132.005	-64.087	-65.674	-67.017	-66.162	-66.65	-46.875	-66.65	-49.561	132.005	0.781	1.162	0.933	0.475	0.781	0.704	1.162	1.467
132.205	-64.087	-65.552	-67.139	-66.162	-66.65	-46.875	-66.65	-49.683	132.205	0.781	1.544	1.315	0.323	0.781	0.781	1.086	1.62
132.405	-64.087	-65.552	-67.017	-66.162	-66.65	-46.997	-66.65	-49.683	132.405	0.704	1.467	1.315	0.475	0.704	0.628	0.857	1.391
132.605	-64.209	-65.552	-67.139	-66.04	-66.65	-46.997	-66.65	-49.805	132.605	0.857	1.238	1.086	1.086	0.857	0.475	0.704	0.933
132.805	-64.209	-65.552	-67.017	-66.04	-66.65	-47.119	-66.65	-49.927	132.805	1.086	1.162	1.238	1.544	1.01	0.323	0.781	0.704
133.005	-64.209	-65.674	-67.017	-66.162	-66.65	-47.119	-66.65	-49.927	133.005	1.162	1.162	1.544	1.467	0.857	0.323	0.704	0.781
133.205	-64.209	-65.674	-67.017	-66.162	-66.65	-47.241	-66.65	-50.049	133.205	1.162	1.162	1.467	1.162	0.628	0.475	0.399	0.704
133.405	-64.087	-65.674	-67.017	-66.162	-66.65	-47.363	-66.65	-50.171	133.405	1.238	1.162	1.238	0.857	0.552	0.628	0.475	0.399
133.605	-64.087	-65.674	-67.017	-66.162	-66.65	-47.363	-66.772	-50.293	133.605	1.467	1.238	1.162	0.704	0.628	0.781	1.086	0.399
133.805	-64.087	-65.674	-67.017	-66.04	-66.65	-47.363	-66.65	-50.293	133.805	1.544	1.467	1.086	0.857	0.857	0.781	1.467	0.781
134.005	-64.087	-65.674	-67.017	-66.04	-66.65	-47.485	-66.65	-50.415	134.005	1.162	1.62	0.933	1.01	1.086	0.704	1.086	1.086
134.205	-64.087	-65.674	-67.017	-66.162	-66.65	-47.607	-66.65	-50.537	134.205	0.704	1.467	1.086	0.857	1.086	0.781	0.475	1.162
134.405	-64.087	-65.674	-67.017	-66.04	-66.528	-47.607	-66.65	-50.537	134.405	0.552	1.162	1.62	0.704	0.781	0.781	0.323	1.086
134.605	-64.087	-65.674	-66.895	-66.04	-66.65	-47.729	-66.65	-50.537	134.605	0.628	0.857	1.925	0.857	0.399	0.704	0.399	0.857
134.805	-64.087	-65.674	-67.017	-66.04	-66.65	-47.729	-66.65	-50.781	134.805	0.857	0.704	1.849	1.086	0.399	0.781	0.247	0.704
135.005	-64.087	-65.674	-66.895	-66.04	-66.65	-47.974	-66.65	-50.781	135.005	1.086	0.857	1.772	1.162	0.781	0.781	0.094	0.781
135.205	-64.209	-65.674	-66.895	-66.162	-66.528	-47.852	-66.65	-50.903	135.205	1.162	1.086	1.772	1.162	1.086	0.704	0.323	0.781
135.405	-64.209	-65.674	-67.017	-66.162	-66.528	-47.974	-66.65	-50.903	135.405	1.162	1.238	1.696	1.162	1.238	0.781	0.781	0.704
135.605	-64.209	-65.674	-67.017	-66.162	-66.528	-48.096	-66.65	-51.025	135.605	1.162	1.544	1.467	1.238	1.467	0.781	1.01	0.781
135.805	-64.209	-65.674	-67.017	-66.162	-66.528	-48.096	-66.65	-51.025	135.805	1.086	1.925	1.238	1.467	1.544	0.704	0.857	0.704
136.005	-64.087	-65.674	-67.017	-66.162	-66.65	-48.096	-66.65	-51.025	136.005	0.933	1.849	1.162	1.62	1.086	0.781	0.704	0.399
136.205	-64.087	-65.674	-67.017	-66.162	-66.528	-48.34	-66.65	-51.27	136.205	1.01	1.238	1.238	1.467	0.475	0.781	0.781	0.323
136.405	-64.087	-65.674	-67.017	-66.04	-66.528	-48.34	-66.65	-51.27	136.405	1.315	0.781	1.467	1.238	0.399	0.628	0.781	0.475
136.605	-64.087	-65.552	-67.017	-66.162	-66.65	-48.462	-66.65	-51.392	136.605	1.315	0.857	1.62	1.238	0.781	0.552	0.704	0.628
136.805	-64.087	-65.552	-67.139	-66.162	-66.65	-48.584	-66.65	-51.514	136.805	0.933	1.162	1.467	1.544	1.086	0.628	0.781	0.781
137.005	-64.209	-65.552	-67.017	-66.162	-66.65	-48.584	-66.65	-51.514	137.005	0.704	1.391	1.238	1.925	1.238	0.857	0.781	0.781
137.205	-64.087	-65.552	-67.017	-66.162	-66.528	-48.706	-66.65	-51.636	137.205	0.857	1.315	1.162	1.925	1.467	1.086	0.628	0.628
137.405	-64.087	-65.552	-67.017	-66.162	-66.65	-48.828	-66.65	-51.636	137.405	1.086	1.01	1.162	1.62	1.62	1.086	0.552	0.475
137.605	-64.087	-65.552	-67.017	-66.162	-66.65	-48.828	-66.65	-51.758	137.605	1.086	0.933	1.162	1.544	1.467	0.933	0.552	0.323
137.805	-64.087	-65.552	-67.139	-66.162	-66.528	-48.95	-66.65	-51.758	137.805	0.857	1.086	1.238	1.62	1.315	0.933	0.628	0.399
138.005	-64.087	-65.552	-67.017	-66.162	-66.65	-49.072	-66.528	-51.88	138.005	0.704	1.162	1.467	1.467	1.467	0.933	0.933	0.704
138.205	-64.087	-65.674	-67.139	-66.162	-66.65	-49.072	-66.65	-51.88	138.205	0.857	1.162	1.62	1.315	1.62	0.552	1.315	0.781
138.405	-64.087	-65.552	-67.017	-66.162	-66.65	-49.194	-66.528	-52.124	138.405	1.086	1.162	1.391	1.467	1.467	0.17	1.391	0.704
138.605	-64.087	-65.552	-67.017	-66.04	-66.65	-49.194	-66.528	-52.124	138.605	1.162	1.162	1.01	1.696	1.238	0.323	1.238	0.781
138.805	-64.087	-65.552	-67.017	-66.162	-66.65	-49.316	-66.65	-52.124	138.805	1.162	1.162	1.01	1.772	1.162	0.781	1.162	0.781
139.005	-64.087	-65.674	-67.017	-66.162	-66.65	-49.438	-66.65	-52.246	139.005	1.086	1.162	1.315	1.772	1.162	1.01	1.162	0.628
139.205	-64.087	-65.674	-67.017	-66.162	-66.65	-49.438	-66.65	-52.246	139.205	0.857	1.086	1.391	1.772	1.162	0.857	1.162	0.475
139.405	-64.087	-65.674	-67.017	-66.04	-66.528	-49.438	-66.528	-52.368	139.405	0.704	0.781	1.238	1.696	1.086	0.704	1.086	0.247
139.605	-64.087	-65.674	-67.017	-66.162	-66.65	-49.683	-66.528	-52.368	139.605	0.781	0.399	1.238	1.467	0.857	0.857	0.857	0.17
139.805	-64.087	-65.674	-67.017	-66.04	-66.528	-49.561	-66.65	-52.49	139.805	0.704	0.399	1.467	1.238	0.781	1.086	0.704	0.628
140.005	-64.087	-65.674	-67.139	-66.162	-66.65	-49.683	-66.65	-52.49	140.005	0.399	0.781	1.62	1.238	1.162	1.162	0.781	1.162
140.205	-64.087	-65.674	-67.017	-66.162	-66.528	-49.805	-66.65	-52.612	140.205	0.399	1.086	1.467	1.544	1.544	1.238	0.857	1.01
140.405	-64.087	-65.674	-67.017	-66.04	-66.528	-49.805	-66.528	-52.734	140.405	0.857	1.162	1.315	1.925	1.544	1.467	1.01	0.552
140.605	-64.087	-65.674	-67.017	-66.162	-66.528	-49.927	-66.65	-52.734	140.605	1.315	1.086	1.544	1.925	1.544	1.62	1.238	0.628
140.805	-64.087	-65.674	-67.017	-66.04	-66.528	-49.927	-66.65	-52.856	140.805	1.238	0.857	1.925	1.62	1.62	1.391	1.086	0.933
141.005	-64.087	-65.674	-67.017	-66.04	-66.528	-50.049	-66.65	-52.979	141.005	0.704	0.628	1.925	1.544	1.467	0.933	0.704	0.857
141.205	-64.087	-65.674	-66.895	-66.04	-66.528	-50.049	-66.65	-52.979	141.205	0.475	0.475	1.544	1.62	1.238	0.704	0.552	0.628
141.405	-64.087	-65.674	-66.895	-66.162	-66.528	-50.171	-66.528	-52.979	141.405	0.704	0.323	1.315	1.467	1.238	0.857	0.628	0.628
141.605	-64.087	-65.674	-67.017	-66.162	-66.528	-50.293	-66.65	-53.101	141.605	0.781	0.323	1.391	1.238	1.467	1.086	0.857	0.781
141.805	-64.087	-65.674	-67.017	-66.162	-66.528	-50.293	-66.528	-53.223	141.805	0.704	0.399	1.315	1.162	1.62	1.162	1.086	0.704
142.005	-64.087	-65.674	-67.017	-66.04	-66.528	-50.415	-66.528	-53.223	142.005	0.857	0.247	1.086	1.162	1.544	1.238	1.162	0.399
142.205	-64.087	-65.674	-67.017	-66.162	-66.65	-50.537	-66.528	-53.345	142.205	1.01	0.094	1.238	1.162	1.544	1.467	1.162	0.399
142.405	-64.087	-65.674	-67.017	-66.162	-66.65	-50.537	-66.65	-53.345	142.405	0.857	0.323	1.544	1.238	1.62	1.544	1.238	0.857
142.605	-64.087	-65.796	-67.017	-66.162	-66.65	-50.659	-66.528	-53.467	142.605	0.628	0.704	1.467	1.544	1.467	1.162	1.467	1.391
142.805	-64.087	-65.796	-67.017	-66.162	-66.65	-50.659	-66.528	-53.467	142.805	0.552	0.781	1.238	1.925	1.238	0.857	1.62	1.62
143.005	-64.087	-65.674	-67.017	-66.162	-66.65	-50.781	-66.65	-53.589	143.005	0.628	0.628	1.238	1.925	1.162	1.162	1.544	1.467
143.205	-64.087	-65.674	-67.017	-66.162	-66.772	-50.781	-66.528	-53.711	143.205	0.781	0.552	1.467	1.544	1.238	1.467	1.544	1.238
143.405	-63.965	-65.674	-67.017	-66.04	-66.65	-50.903	-66.528	-53.711	143.405	0.704	0.628	1.544	1.315	1.467	1.162	1.62	1.086
143.605	-64.087	-65.674	-67.017	-66.04	-66.65	-51.025	-66.528	-53.833	143.605	0.399	0.857	1.162	1.467	1.62	0.857	1.391	0.857
143.805	-64.087	-65.674	-67.017	-66.162	-66.65	-51.025	-66.528	-53.955	143.805	0.399	1.01	0.857	1.62	1.467	1.162	0.933	0.628
144.005	-64.087	-65.674	-67.139	-66.04	-66.65	-51.147	-66.528	-53.955	144.005	0.781	0.857	1.162	1.467	1.238	1.544	0.704	0.552
144.205	-63.965	-65.674	-67.017	-66.04	-66.65	-51.27	-66.528	-54.077	144.205	1.086	0.704	1.544	1.162	1.162	1.467	0.857	0.628
144.405	-63.965	-65.674	-67.017	-66.162	-66.65	-51.27	-66.528	-54.077	144.405	1.162	0.857	1.391	0.857	1.162	1.238	1.086	0.857
144.605	-63.965	-65.674	-67.139	-66.162	-66.65	-51.392	-66.528	-54.199	144.605	1.162	1.01	0.857	0.628	1.086	1.162	1.162	1.086
144.805	-63.965	-65.674	-67.139	-66.162	-66.65	-51.392	-66.528	-54.199	144.805	1.162	0.857	0.323	0.552	0.857	1.162	1.238	1.162
145.005	-63.965	-65.674	-67.017	-66.162	-66.65	-51.514	-66.528	-54.321	145.005	1.162	0.704	0.018	0.628	0.704	1.086	1.467	1.162
145.205	-63.965	-65.674	-67.017	-66.162	-66.65	-51.514	-66.528	-54.443	145.205	1.086	0.857	0.018	0.933	0.933	0.857	1.62	1.162
145.405	-63.965	-65.674	-67.139	-66.162	-66.65	-51.636	-66.528	-54.443	145.405	0.857	1.01	0.323	1.391	1.315	0.704	1.391	1.162
145.605	-63.965	-65.674	-67.017	-66.04	-66.528	-51.636	-66.528	-54.443	145.605	0.704	0.857	0.781	1.62	1.315	0.857	0.933	1.162
145.805	-63.965	-65.674	-67.017	-66.162	-66.528	-51.758	-66.528	-54.443	145.805	0.781	0.781	1.01	1.391	1.01	1.086	0.704	1.162
146.005	-64.087	-65.674	-67.017	-66.162	-66.65	-51.758	-66.528	-54.688	146.005	0.704	1.162	0.781	0.933	0.933	1.162	0.857	1.162
146.205	-63.965	-65.674	-67.017	-66.162	-66.528	-51.88	-66.528	-54.688	146.205	0.399	1.467	0.399	0.704	1.086	1.162	1.086	1.086
146.405	-63.965	-65.674	-67.017	-66.162	-66.65	-51.88	-66.528	-54.688	146.405	0.399	1.086	0.399	0.781	1.162	1.238	1.162	0.781
146.605	-64.087	-65.674	-67.017	-66.162	-66.65	-51.88	-66.528	-54.81	146.605	0.704	0.475	0.781	0.781	1.162	1.467	1.162	0.475
146.805	-64.087	-65.674	-67.017	-66.162	-66.65	-52.002	-66.528	-54.81	146.805	0.781	0.399	1.086	0.704	1.162	1.62	1.162	0.781
147.005	-64.087	-65.674	-67.017	-66.162	-66.65	-52.124	-66.528	-54.932	147.005	0.781	0.781	1.162	0.857	1.162	1.467	1.086	1.467
147.205	-64.087	-65.674	-67.017	-66.162	-66.65	-52.246	-66.65	-55.054	147.205	1.162	1.01	1.162	1.01	1.162	1.315	0.933	1.544
147.405	-64.087	-65.674	-67.017	-66.04	-66.65	-52.246	-66.528	-55.054	147.405	1.544	0.857	1.086	0.857	1.162	1.467	1.01	1.086
147.605	-64.087	-65.674	-67.017	-66.162	-66.772	-52.246	-66.528	-54.932	147.605	1.391	0.704	0.781	0.704	1.162	1.544	1.315	0.933
147.805	-64.087	-65.674	-67.017	-66.04	-66.65	-52.368	-66.528	-54.81	147.805	0.933	0.857	0.323	0.857	1.162	1.162	1.391	1.086
148.005	-64.087	-65.674	-67.017	-66.04	-66.65	-52.368	-66.528	-54.688	148.005	0.704	1.01	0.094	1.086	1.162	0.781	1.238	1.086
148.205	-64.087	-65.674	-67.017	-66.162	-66.65	-52.49	-66.528	-54.443	148.205	0.933	0.781	0.323	1.086	1.162	0.857	1.238	0.857
148.405	-64.087	-65.674	-67.017	-66.04	-66.65	-52.49	-66.528	-54.199	148.405	1.391	0.399	0.781	0.857	1.162	1.086	1.467	0.781
148.605	-64.087	-65.674	-67.017	-66.04	-66.65	-52.612	-66.528	-53.833	148.605	1.544	0.399	1.01	0.628	1.162	1.086	1.544	1.162
148.805	-64.087	-65.674	-67.017	-66.04	-66.65	-52.612	-66.528	-53.589	148.805	1.162	0.704	0.857	0.475	1.086	0.857	1.162	1.544
149.005	-64.087	-65.674	-67.017	-66.04	-66.65	-52.734	-66.528	-53.345	149.005	0.781	0.781	0.628	0.323	0.781	0.704	0.781	1.391
149.205	-64.087	-65.674	-67.017	-66.04	-66.65	-52.856	-66.528	-52.979	149.205	0.857	0.628	0.552	0.323	0.399	0.857	0.857	0.933
149.405	-64.087	-65.674	-67.017	-66.04	-66.772	-52.979	-66.528	-52.612	149.405	1.086	0.552	0.628	0.399	0.323	1.01	1.01	0.704
149.605	-64.087	-65.674	-67.017	-66.04	-66.65	-52.979	-66.528	-52.124	149.605	1.162	0.628	0.781	0.323	0.399	0.857	0.857	0.781
149.805	-64.087	-65.674	-67.017	-65.796	-66.65	-53.101	-66.528	-51.758	149.805	1.162	0.857	0.781	0.399	0.247	0.704	0.704	0.781
150.005	-64.087	-65.674	-67.017	-65.552	-66.65	-53.223	-66.528	-51.27	150.005	1.162	1.086	0.704	0.704	0.018	0.781	0.933	0.781
150.205	-64.087	-65.674	-67.017	-65.063	-66.772	-53.223	-66.528	-50.781	150.205	1.238	1.238	0.857	0.704	0.018	0.781	1.467	1.162
150.405	-64.087	-65.674	-67.017	-64.575	-66.65	-53.345	-66.528	-50.293	150.405	1.467	1.467	1.086	0.323	0.247	0.628	1.925	1.544
150.605	-64.087	-65.674	-67.017	-63.965	-66.772	-53.345	-66.528	-49.927	150.605	1.544	1.62	1.162	0.094	0.475	0.552	1.925	1.391
150.805	-64.087	-65.674	-67.017	-63.232	-66.772	-53.345	-66.528	-49.438	150.805	1.162	1.467	1.162	0.323	0.552	0.628	1.544	0.933
151.005	-64.087	-65.43	-67.017	-62.5	-66.772	-53.467	-66.528	-48.828	151.005	0.781	1.315	1.162	0.781	0.552	0.781	1.238	0.704
151.205	-64.087	-65.063	-67.017	-61.768	-66.772	-53.467	-66.406	-48.462	151.205	0.857	1.544	1.162	1.086	0.552	0.781	1.086	0.857
151.406	-64.087	-64.697	-67.017	-60.913	-66.772	-53.589	-66.528	-47.852	151.406	1.086	1.925	1.162	1.086	0.475	0.704	0.781	1.01
151.606	-64.087	-63.965	-67.017	-60.059	-66.772	-53.711	-66.528	-47.363	151.606	1.162	1.925	1.162	0.781	0.247	0.857	0.399	0.857
151.806	-64.087	-63.477	-67.017	-59.082	-66.772	-53.711	-66.528	-46.875	151.806	1.238	1.62	1.162	0.399	0.094	1.086	0.475	0.628
152.006	-64.087	-62.622	-67.017	-58.228	-66.772	-53.711	-66.65	-46.387	152.006	1.391	1.62	1.238	0.323	0.323	1.086	1.086	0.552
152.206	-64.087	-61.768	-67.017	-57.251	-66.65	-53.833	-66.528	-45.898	152.206	1.315	1.925	1.544	0.475	0.704	0.781	1.544	0.628
152.406	-64.209	-61.035	-66.895	-56.274	-66.772	-53.833	-66.528	-45.41	152.406	1.01	2.001	1.925	0.628	0.704	0.399	1.467	0.781
152.606	-64.087	-60.181	-67.017	-55.298	-66.65	-53.955	-66.528	-44.8	152.606	0.933	1.772	1.925	0.781	0.399	0.323	1.238	0.781
152.806	-64.087	-59.204	-67.017	-54.321	-66.65	-53.955	-66.528	-44.434	152.806	1.086	1.391	1.62	0.704	0.399	0.475	1.162	0.628
153.006	-64.087	-58.35	-66.895	-53.467	-66.65	-54.077	-66.528	-43.945	153.006	1.162	1.01	1.544	0.399	0.704	0.552	1.162	0.552
153.206	-64.087	-57.251	-67.017	-52.49	-66.772	-54.077	-66.65	-43.457	153.206	1.086	0.933	1.62	0.399	0.781	0.552	1.086	0.552
153.406	-64.209	-56.274	-66.895	-51.392	-66.65	-54.077	-66.65	-42.969	153.406	0.933	1.01	1.467	0.704	0.704	0.552	0.857	0.552
153.606	-64.087	-55.298	-67.017	-50.415	-66.65	-54.199	-66.528	-42.358	153.606	1.01	0.857	1.315	0.704	0.857	0.475	0.704	0.628
153.806	-64.087	-54.199	-66.895	-49.438	-66.65	-54.321	-66.528	-41.87	153.806	1.315	0.704	1.467	0.399	1.01	0.323	0.857	0.781
154.006	-64.087	-53.345	-66.895	-48.34	-66.65	-54.321	-66.528	-41.382	154.006	1.391	0.857	1.62	0.323	0.857	0.323	1.086	0.704
154.206	-64.087	-52.246	-66.895	-47.241	-66.65	-54.321	-66.528	-40.894	154.206	1.162	1.086	1.467	0.552	0.628	0.475	1.162	0.323
154.406	-64.087	-51.27	-66.895	-46.021	-66.772	-54.443	-66.65	-40.405	154.406	0.933	1.162	1.238	0.857	0.552	0.628	1.162	0.094
154.606	-64.209	-50.171	-66.895	-44.8	-66.65	-54.443	-66.65	-39.795	154.606	1.086	1.162	1.238	0.933	0.628	0.857	1.162	0.323
154.806	-64.087	-49.072	-66.895	-43.457	-66.772	-54.565	-66.528	-39.307	154.806	1.62	1.162	1.467	0.628	0.781	1.01	1.086	0.704
155.006	-64.087	-47.974	-66.772	-41.87	-66.772	-54.565	-66.528	-38.818	155.006	1.772	1.162	1.62	0.552	0.781	0.857	0.857	0.704
155.206	-64.087	-46.753	-66.895	-39.795	-66.65	-54.565	-66.528	-38.33	155.206	1.315	1.162	1.544	1.086	0.704	0.628	0.704	0.323
155.406	-64.209	-45.532	-66.895	-36.987	-66.772	-54.565	-66.528	-37.842	155.406	1.086	1.162	1.544	1.467	0.857	0.475	0.857	0.018
155.606	-64.087	-44.189	-66.895	-31.982	-66.65	-54.81	-66.528	-37.354	155.606	1.315	1.162	1.62	1.086	1.01	0.323	1.01	-0.059
155.806	-64.087	-42.603	-66.895	-16.235	-66.65	-54.81	-66.528	-36.865	155.806	1.315	1.162	1.391	0.475	0.857	0.323	0.857	-0.059
156.006	-64.087	-40.771	-66.895	21.362	-66.772	-54.81	-66.528	-36.255	156.006	0.933	1.162	0.933	0.323	0.628	0.399	0.704	-0.059
156.206	-64.087	-38.33	-66.895	38.818	-66.65	-54.932	-66.65	-35.767	156.206	0.781	1.162	0.704	0.475	0.552	0.247	0.933	-0.059
156.406	-64.087	-34.424	-66.895	42.725	-66.65	-55.054	-66.528	-35.156	156.406	1.162	1.162	0.857	0.628	0.628	0.018	1.315	0.018
156.606	-64.087	-24.902	-66.895	43.091	-66.65	-55.054	-66.65	-34.546	156.606	1.544	1.162	1.086	0.857	0.857	-0.059	1.315	0.323
156.806	-64.087	8.301	-67.017	42.358	-66.772	-55.176	-66.65	-33.936	156.806	1.467	1.086	1.162	1.01	1.086	-0.059	1.01	0.704
157.006	-64.087	35.034	-66.895	41.138	-66.772	-55.176	-66.65	-33.447	157.006	1.238	0.781	1.238	0.857	1.162	0.018	0.933	0.704
157.206	-64.087	41.992	-66.895	39.673	-66.65	-55.176	-66.528	-32.715	157.206	1.162	0.399	1.544	0.704	1.162	0.323	1.086	0.399
157.406	-64.087	43.091	-66.895	38.33	-66.65	-55.298	-66.528	-32.104	157.406	1.162	0.399	1.925	0.857	1.162	0.781	1.086	0.323
157.606	-64.087	42.603	-67.017	36.865	-66.65	-55.298	-66.528	-31.372	157.606	1.162	0.781	1.925	1.086	1.162	1.086	0.781	0.399
157.806	-64.087	41.504	-67.017	35.4	-66.65	-55.42	-66.528	-30.64	157.806	1.162	0.933	1.544	1.086	1.162	1.162	0.323	0.247
158.006	-64.087	40.161	-67.017	33.936	-66.65	-55.42	-66.528	-29.907	158.006	1.162	0.552	1.315	0.781	1.162	1.162	0.094	0.17
158.206	-64.209	38.574	-66.895	32.471	-66.65	-55.42	-66.528	-29.175	158.206	1.086	0.17	1.467	0.323	1.162	1.086	0.323	0.628
158.406	-64.209	36.987	-66.895	31.25	-66.65	-55.542	-66.528	-28.32	158.406	0.857	0.247	1.62	0.094	1.162	0.781	0.781	1.162
158.606	-64.209	35.4	-67.017	30.151	-66.65	-55.664	-66.65	-27.466	158.606	0.628	0.475	1.391	0.323	1.238	0.399	1.086	1.086
158.806	-64.087	33.936	-66.895	28.931	-66.65	-55.664	-66.528	-26.489	158.806	0.552	0.552	1.01	0.781	1.467	0.399	1.162	0.704
159.006	-64.209	32.593	-66.895	27.954	-66.65	-55.664	-66.528	-25.635	159.006	0.628	0.552	1.01	1.086	1.62	0.781	1.162	0.628
159.206	-64.209	31.25	-66.895	27.1	-66.65	-55.664	-66.528	-24.536	159.206	0.781	0.475	1.315	1.162	1.467	1.086	1.162	0.857
159.406	-64.209	30.029	-66.895	26.123	-66.65	-55.786	-66.528	-23.56	159.406	0.781	0.323	1.315	1.162	1.238	1.162	1.086	0.933
159.606	-64.209	28.809	-66.895	25.391	-66.65	-55.786	-66.528	-22.461	159.606	0.704	0.399	0.933	1.086	1.238	1.086	0.857	0.628
159.806	-64.209	27.832	-66.895	24.658	-66.65	-55.908	-66.528	-21.24	159.806	0.857	0.781	0.781	0.781	1.467	0.781	0.704	0.475
160.006	-64.209	26.733	-66.895	23.926	-66.65	-55.908	-66.528	-20.02	160.006	1.01	1.086	1.162	0.399	1.62	0.323	0.781	0.704
160.206	-64.331	26.001	-66.895	23.315	-66.65	-56.03	-66.528	-18.677	160.206	0.857	1.086	1.544	0.399	1.467	0.094	0.704	0.704
160.406	-64.209	25.024	-66.895	22.827	-66.65	-55.908	-66.528	-17.456	160.406	0.704	0.781	1.467	0.857	1.315	0.399	0.399	0.399
160.606	-64.331	24.292	-66.895	22.339	-66.65	-56.03	-66.528	-16.357	160.606	0.781	0.323	1.238	1.315	1.467	1.01	0.399	0.399
160.806	-64.209	23.682	-66.772	21.851	-66.65	-56.152	-66.65	-15.137	160.806	0.704	0.018	1.162	1.315	1.62	1.238	0.781	0.704
161.006	-64.209	23.071	-66.895	21.362	-66.65	-56.152	-66.528	-14.038	161.006	0.323	0.018	1.162	1.01	1.467	1.01	1.086	0.781
161.206	-64.209	22.461	-66.895	20.996	-66.65	-56.152	-66.528	-13.184	161.206	0.094	0.247	1.162	0.857	1.238	0.933	1.162	0.552
161.406	-64.209	21.973	-66.895	20.63	-66.65	-56.274	-66.528	-12.207	161.406	0.323	0.399	1.238	0.781	1.162	1.086	1.238	0.17
161.606	-64.209	21.362	-66.895	20.142	-66.65	-56.396	-66.528	-11.597	161.606	0.781	0.247	1.467	0.704	1.162	1.162	1.467	-0.211
161.806	-64.209	20.996	-66.895	19.897	-66.65	-56.396	-66.528	-10.864	161.806	1.01	0.094	1.544	0.781	1.162	1.086	1.62	-0.211
162.006	-64.209	20.508	-66.895	19.653	-66.65	-56.396	-66.528	-10.376	162.006	0.781	0.247	1.162	0.781	1.162	0.933	1.467	0.247
162.206	-64.209	20.02	-66.895	19.165	-66.65	-56.519	-66.528	-9.766	162.206	0.399	0.399	0.781	0.704	1.162	1.01	1.315	0.704
162.406	-64.331	19.775	-66.895	18.921	-66.65	-56.519	-66.528	-9.399	162.406	0.399	0.247	0.857	0.781	1.162	1.315	1.467	0.781
162.606	-64.209	19.287	-66.895	18.677	-66.772	-56.519	-66.528	-9.155	162.606	0.704	0.094	1.01	0.781	1.086	1.391	1.544	0.704
162.806	-64.209	19.043	-66.895	18.433	-66.65	-56.641	-66.528	-8.789	162.806	0.781	0.247	0.781	0.704	0.857	1.238	1.162	0.781
163.006	-64.209	18.799	-66.895	18.066	-66.65	-56.641	-66.528	-8.545	163.006	0.704	0.399	0.399	0.857	0.781	1.162	0.781	0.704
163.206	-64.209	18.433	-66.895	17.822	-66.772	-56.763	-66.528	-8.301	163.206	0.857	0.247	0.399	1.086	1.162	1.162	0.857	0.323
163.406	-64.209	18.188	-66.895	17.7	-66.65	-56.763	-66.528	-8.057	163.406	1.01	0.094	0.781	1.162	1.544	1.162	1.01	0.094
163.606	-64.209	17.944	-66.895	17.456	-66.65	-56.885	-66.65	-7.812	163.606	0.781	0.247	1.01	1.162	1.467	1.162	0.781	0.247
163.806	-64.209	17.578	-66.895	17.212	-66.772	-56.885	-66.528	-7.568	163.806	0.399	0.399	0.857	1.086	1.238	1.162	0.399	0.399
164.006	-64.209	17.456	-67.017	16.968	-66.772	-57.007	-66.528	-7.446	164.006	0.399	0.247	0.704	0.781	1.162	1.162	0.399	0.247
164.206	-64.209	17.212	-67.017	16.724	-66.65	-57.007	-66.528	-7.202	164.206	0.704	0.094	0.857	0.323	1.162	1.162	0.781	0.094
164.406	-64.209	16.968	-66.895	16.602	-66.65	-57.129	-66.528	-7.08	164.406	0.781	0.323	1.086	0.094	1.162	1.162	1.162	0.323
164.606	-64.209	16.724	-66.895	16.357	-66.65	-57.129	-66.528	-6.958	164.606	0.628	0.781	1.086	0.323	1.086	1.162	1.467	0.704
164.806	-64.209	16.602	-66.895	16.113	-66.65	-57.129	-66.528	-6.714	164.806	0.475	0.933	0.857	0.628	0.857	1.162	1.62	0.704
165.006	-64.209	16.357	-66.895	15.991	-66.65	-57.129	-66.528	-6.592	165.006	0.247	0.475	0.704	0.475	0.704	1.086	1.467	0.399
165.206	-64.209	16.235	-66.895	15.747	-66.772	-57.251	-66.65	-6.47	165.206	0.094	-0.135	0.781	0.17	0.857	0.857	1.238	0.399
165.406	-64.209	15.991	-66.772	15.625	-66.65	-57.373	-66.65	-6.226	165.406	0.323	-0.287	0.781	0.247	1.086	0.704	1.162	0.704
165.606	-64.209	15.747	-66.895	15.503	-66.65	-57.373	-66.528	-5.981	165.606	0.781	-0.211	0.628	0.475	1.162	0.857	1.162	0.781
165.806	-64.331	15.625	-66.772	15.259	-66.65	-57.373	-66.528	-5.981	165.806	1.01	-0.287	0.552	0.475	1.238	1.086	1.162	0.704
166.006	-64.209	15.503	-66.895	15.015	-66.65	-57.495	-66.528	-5.737	166.006	0.857	-0.135	0.628	0.247	1.467	1.162	1.162	0.857
166.206	-64.209	15.259	-66.772	14.893	-66.65	-57.495	-66.528	-5.737	166.206	0.628	0.475	0.781	0.094	1.62	1.162	1.086	1.01
166.406	-64.209	15.015	-66.772	14.648	-66.65	-57.495	-66.528	-5.493	166.406	0.552	0.857	0.781	0.323	1.467	1.162	0.857	0.857
166.606	-64.209	14.771	-66.895	14.526	-66.65	-57.495	-66.528	-5.371	166.606	0.628	0.475	0.704	0.781	1.315	1.162	0.704	0.704
166.806	-64.331	14.648	-66.772	14.282	-66.65	-57.495	-66.528	-5.249	166.806	0.857	-0.135	0.857	1.01	1.467	1.162	0.857	0.933
167.006	-64.209	14.526	-66.772	14.16	-66.772	-57.617	-66.65	-5.127	167.006	1.086	-0.211	1.086	0.857	1.544	1.162	1.086	1.391
167.206	-64.331	14.282	-66.772	13.916	-66.65	-57.617	-66.528	-5.005	167.206	1.162	0.247	1.162	0.552	1.162	1.162	1.162	1.62
167.406	-64.209	14.16	-66.772	13.794	-66.65	-57.617	-66.528	-4.883	167.406	1.162	0.704	1.162	0.094	0.704	1.162	1.162	1.467
167.606	-64.209	13.916	-66.895	13.672	-66.772	-57.739	-66.528	-4.761	167.606	1.238	0.704	1.162	-0.516	0.552	1.162	1.238	1.238
167.806	-64.209	13.794	-66.895	13.428	-66.65	-57.739	-66.528	-4.761	167.806	1.467	0.323	1.086	-0.745	0.552	1.162	1.467	1.162
168.006	-64.209	13.55	-66.895	13.428	-66.65	-57.739	-66.528	-4.517	168.006	1.62	0.094	0.857	-0.44	0.552	1.162	1.62	1.162
168.206	-64.331	13.306	-66.895	13.184	-66.772	-57.861	-66.528	-4.395	168.206	1.467	0.247	0.704	-0.211	0.628	1.162	1.467	1.086
168.406	-64.209	13.184	-66.895	12.939	-66.772	-57.861	-66.528	-4.395	168.406	1.238	0.399	0.857	-0.364	0.857	1.162	1.238	0.933
168.606	-64.209	13.062	-66.895	12.817	-66.772	-57.983	-66.528	-4.272	168.606	1.162	0.323	1.086	-0.516	1.01	1.162	1.162	0.933
168.806	-64.209	12.817	-66.895	12.695	-66.772	-58.105	-66.528	-4.272	168.806	1.162	0.323	1.162	-0.287	0.781	1.162	1.162	1.01
169.006	-64.209	12.695	-66.895	12.573	-66.772	-58.105	-66.528	-4.028	169.006	1.162	0.475	1.086	0.17	0.323	1.238	1.162	0.933
169.206	-64.209	12.451	-66.895	12.329	-66.772	-58.105	-66.528	-4.028	169.206	1.162	0.628	0.857	0.399	0.094	1.467	1.238	0.857
169.406	-64.209	12.329	-67.017	12.207	-66.772	-58.228	-66.528	-4.028	169.406	1.238	0.857	0.781	0.247	0.323	1.62	1.467	0.781
169.606	-64.209	12.207	-66.895	11.963	-66.772	-58.228	-66.528	-3.906	169.606	1.391	1.086	1.162	0.018	0.704	1.467	1.62	0.704
169.806	-64.209	11.963	-66.895	11.841	-66.65	-58.35	-66.65	-3.784	169.806	1.315	1.086	1.467	-0.059	0.781	1.238	1.467	0.857
170.006	-64.331	11.719	-66.895	11.597	-66.772	-58.35	-66.65	-3.784	170.006	1.086	0.781	1.162	0.018	0.628	1.238	1.315	1.086
170.206	-64.331	11.475	-66.895	11.475	-66.772	-58.35	-66.65	-3.784	170.206	1.315	0.323	0.781	0.17	0.552	1.391	1.467	1.162
170.406	-64.209	11.353	-66.895	11.23	-66.65	-58.472	-66.65	-3.662	170.406	1.849	0.17	0.857	0.094	0.628	1.238	1.62	1.162
170.606	-64.331	11.23	-66.895	11.108	-66.65	-58.472	-66.65	-3.662	170.606	1.925	0.628	1.086	-0.135	0.857	0.704	1.544	1.162
170.806	-64.331	10.986	-66.895	10.864	-66.65	-58.472	-66.65	-3.54	170.806	1.544	1.238	1.162	0.018	1.086	0.475	1.544	1.162
171.006	-64.331	10.864	-66.895	10.742	-66.65	-58.594	-66.65	-3.54	171.006	1.238	1.315	1.162	0.399	1.162	0.781	1.62	1.086
171.206	-64.331	10.62	-66.895	10.498	-66.65	-58.594	-66.65	-3.54	171.206	1.162	0.933	1.162	0.552	1.086	1.01	1.467	0.857
171.406	-64.331	10.376	-66.895	10.254	-66.65	-58.594	-66.65	-3.54	171.406	1.162	0.704	1.162	0.475	0.781	0.781	1.162	0.704
171.606	-64.209	10.254	-66.895	10.01	-66.65	-58.716	-66.65	-3.54	171.606	1.162	0.857	1.162	0.247	0.399	0.399	0.781	0.781
171.806	-64.209	10.01	-66.772	9.888	-66.65	-58.716	-66.65	-3.54	171.806	1.238	1.01	1.162	0.018	0.399	0.399	0.399	0.704
172.006	-64.331	9.888	-66.772	9.644	-66.65	-58.716	-66.65	-3.54	172.006	1.467	0.933	1.162	0.018	0.781	0.704	0.475	0.399
172.206	-64.331	9.644	-66.772	9.521	-66.65	-58.716	-66.65	-3.54	172.206	1.62	1.086	1.162	0.323	1.086	0.781	1.086	0.475
172.406	-64.331	9.521	-66.772	9.277	-66.65	-58.838	-66.65	-3.54	172.406	1.467	1.62	1.162	0.704	1.162	0.704	1.467	1.086
172.606	-64.331	9.277	-66.772	9.033	-66.65	-58.838	-66.65	-3.54	172.606	1.238	1.849	1.238	0.704	1.086	0.857	1.162	1.544
172.806	-64.331	9.033	-66.895	8.911	-66.65	-58.838	-66.65	-3.662	172.806	1.162	1.544	1.467	0.323	0.857	1.086	0.781	1.391
173.006	-64.331	8.789	-66.772	8.667	-66.65	-58.838	-66.65	-3.662	173.006	1.162	1.238	1.62	0.018	0.704	1.162	0.781	0.933
173.206	-64.331	8.667	-66.772	8.423	-66.65	-58.838	-66.65	-3.784	173.206	1.162	1.086	1.544	0.018	0.781	1.162	0.781	0.704
173.406	-64.331	8.423	-66.772	8.301	-66.65	-58.838	-66.65	-3.784	173.406	1.238	0.781	1.62	0.247	0.781	1.162	0.704	0.781
173.606	-64.331	8.301	-66.772	8.057	-66.65	-58.96	-66.65	-3.784	173.606	1.391	0.399	1.925	0.399	0.704	1.162	0.857	0.781
173.806	-64.331	8.057	-66.772	7.812	-66.65	-58.96	-66.65	-3.784	173.806	1.315	0.399	1.925	0.323	0.781	1.086	1.086	0.628
174.006	-64.331	7.935	-66.772	7.69	-66.65	-59.082	-66.65	-3.784	174.006	1.01	0.781	1.544	0.399	0.781	0.704	1.162	0.552
174.206	-64.331	7.69	-66.895	7.446	-66.65	-59.082	-66.65	-3.906	174.206	0.933	1.086	1.238	0.781	0.704	0.094	1.086	0.628
174.406	-64.331	7.446	-66.895	7.202	-66.65	-59.082	-66.65	-4.028	174.406	1.086	1.086	1.238	1.01	0.781	-0.059	0.781	0.781
174.606	-64.331	7.202	-66.895	7.08	-66.65	-59.082	-66.528	-4.028	174.606	1.162	0.857	1.467	0.781	0.781	0.475	0.399	0.704
174.806	-64.331	7.08	-66.895	6.836	-66.528	-59.204	-66.65	-4.028	174.806	1.162	0.781	1.62	0.399	0.628	0.933	0.323	0.399
175.006	-64.331	6.836	-66.895	6.592	-66.65	-59.204	-66.65	-4.028	175.006	1.162	1.162	1.467	0.323	0.552	0.857	0.475	0.323
175.206	-64.331	6.592	-66.772	6.348	-66.65	-59.326	-66.65	-4.15	175.206	1.162	1.544	1.162	0.399	0.552	0.704	0.552	0.399
175.406	-64.331	6.348	-66.895	6.104	-66.65	-59.326	-66.65	-4.272	175.406	1.162	1.467	0.933	0.247	0.628	0.781	0.552	0.247
175.606	-64.331	6.226	-66.895	5.981	-66.528	-59.448	-66.65	-4.272	175.606	1.162	1.238	1.01	0.17	0.933	0.704	0.552	0.018
175.806	-64.331	5.981	-66.895	5.737	-66.65	-59.448	-66.65	-4.395	175.806	1.162	1.086	1.315	0.628	1.238	0.399	0.552	-0.059
176.006	-64.331	5.737	-66.895	5.493	-66.65	-59.57	-66.772	-4.395	176.006	1.162	0.857	1.315	1.238	1.01	0.323	0.552	0.018
176.206	-64.331	5.493	-66.772	5.371	-66.65	-59.57	-66.772	-4.517	176.206	1.162	0.704	0.933	1.315	0.475	0.399	0.552	0.323
176.406	-64.331	5.249	-66.772	5.127	-66.65	-59.57	-66.65	-4.517	176.406	1.162	0.857	0.704	0.857	0.399	0.323	0.628	0.781
176.606	-64.331	5.005	-66.772	4.883	-66.65	-59.57	-66.65	-4.639	176.606	1.086	1.086	0.857	0.475	0.781	0.399	0.857	0.933
176.806	-64.331	4.761	-66.772	4.639	-66.65	-59.692	-66.65	-4.761	176.806	0.857	1.086	1.01	0.704	1.01	0.781	1.01	0.475
177.006	-64.331	4.517	-66.895	4.395	-66.528	-59.692	-66.65	-4.883	177.006	0.704	0.857	0.857	1.162	0.857	1.01	0.857	-0.135
177.206	-64.331	4.272	-66.895	4.15	-66.528	-59.814	-66.65	-4.883	177.206	0.857	0.704	0.704	1.086	0.704	0.857	0.704	-0.287
177.406	-64.453	4.028	-66.772	3.906	-66.65	-59.814	-66.65	-5.005	177.406	1.086	0.857	0.857	0.857	0.857	0.704	0.857	-0.135
177.606	-64.331	3.784	-66.895	3.662	-66.528	-59.814	-66.65	-5.127	177.606	1.086	1.086	1.01	1.162	1.01	0.781	1.01	0.018
177.806	-64.453	3.54	-66.895	3.418	-66.528	-59.814	-66.65	-5.249	177.806	0.857	1.162	0.857	1.467	0.857	0.781	0.781	0.323
178.006	-64.453	3.296	-66.895	3.174	-66.528	-59.814	-66.65	-5.249	178.006	0.704	1.162	0.704	1.162	0.781	0.704	0.399	0.704
178.206	-64.331	3.174	-66.895	2.93	-66.528	-59.937	-66.65	-5.493	178.206	0.857	1.162	0.857	0.781	1.162	0.857	0.399	0.781
178.406	-64.453	2.93	-66.895	2.686	-66.528	-59.814	-66.65	-5.493	178.406	1.086	1.162	1.086	0.857	1.544	1.01	0.781	0.628
178.606	-64.453	2.686	-66.895	2.441	-66.528	-59.937	-66.65	-5.615	178.606	1.086	1.086	1.162	1.086	1.467	0.781	1.01	0.475
178.807	-64.331	2.319	-66.772	2.197	-66.528	-59.814	-66.65	-5.859	178.807	0.857	0.933	1.162	1.086	1.238	0.399	0.857	0.247
179.007	-64.453	2.197	-66.895	1.953	-66.528	-59.937	-66.65	-5.981	179.007	0.704	0.933	1.238	0.781	1.162	0.399	0.781	0.018
179.207	-64.453	1.831	-66.895	1.709	-66.528	-59.937	-66.65	-6.104	179.207	0.857	1.01	1.467	0.399	1.162	0.781	1.162	0.018
179.407	-64.453	1.587	-66.895	1.587	-66.528	-60.059	-66.65	-6.226	179.407	1.01	0.857	1.62	0.399	1.162	1.086	1.544	0.323
179.607	-64.453	1.343	-66.772	1.221	-66.528	-60.059	-66.65	-6.348	179.607	0.857	0.552	1.391	0.781	1.162	1.162	1.391	0.781
179.807	-64.453	1.099	-66.772	0.977	-66.528	-60.059	-66.65	-6.47	179.807	0.628	0.247	0.933	1.086	1.238	1.162	0.933	1.01
180.007	-64.453	0.854	-66.895	0.732	-66.528	-60.059	-66.65	-6.592	180.007	0.399	0.094	0.704	1.162	1.544	1.162	0.704	0.781
180.207	-64.453	0.61	-66.772	0.488	-66.528	-60.059	-66.65	-6.592	180.207	-0.059	0.17	0.857	1.162	2.001	1.162	0.857	0.475
180.407	-64.575	0.488	-66.772	0.366	-66.528	-60.181	-66.65	-6.714	180.407	-0.364	0.17	1.086	1.162	2.23	1.162	1.086	0.704
180.607	-64.453	0.122	-66.895	0	-66.528	-60.303	-66.65	-6.836	180.607	0.094	0.094	1.162	1.086	2.078	1.162	1.086	1.238
180.807	-64.453	-0.122	-66.772	-0.244	-66.65	-60.303	-66.65	-6.958	180.807	0.933	0.17	1.238	0.857	1.925	1.162	0.933	1.391
181.007	-64.453	-0.366	-66.772	-0.488	-66.65	-60.303	-66.772	-7.08	181.007	1.162	0.17	1.391	0.781	2.078	1.162	1.01	1.238
181.207	-64.453	-0.732	-66.772	-0.61	-66.528	-60.303	-66.65	-7.202	181.207	0.704	0.018	1.315	1.162	2.23	1.162	1.315	1.086
181.407	-64.453	-0.854	-66.772	-0.977	-66.528	-60.303	-66.65	-7.324	181.407	0.475	-0.059	0.933	1.467	2.001	1.238	1.391	0.781
181.607	-64.453	-1.099	-66.895	-1.221	-66.528	-60.425	-66.65	-7.446	181.607	0.781	-0.059	0.704	1.086	1.544	1.467	1.315	0.323
181.807	-64.453	-1.465	-66.895	-1.465	-66.528	-60.425	-66.65	-7.568	181.807	1.01	-0.059	0.933	0.475	1.238	1.62	1.467	0.094
182.007	-64.453	-1.709	-66.895	-1.831	-66.528	-60.425	-66.65	-7.69	182.007	0.857	-0.059	1.315	0.323	1.086	1.467	1.62	0.247
182.207	-64.453	-1.953	-66.895	-2.075	-66.528	-60.425	-66.65	-7.812	182.207	0.628	-0.059	1.391	0.399	0.857	1.238	1.467	0.399
182.407	-64.453	-2.197	-66.895	-2.197	-66.528	-60.547	-66.772	-7.935	182.407	0.552	-0.059	1.238	0.247	0.704	1.238	1.238	0.247
182.607	-64.453	-2.441	-66.895	-2.563	-66.528	-60.547	-66.772	-8.057	182.607	0.628	-0.059	1.162	0.094	0.857	1.467	1.162	0.094
182.807	-64.453	-2.808	-66.895	-2.686	-66.528	-60.547	-66.65	-8.179	182.807	0.704	-0.059	1.162	0.323	1.086	1.62	1.086	0.323
183.007	-64.453	-3.052	-66.895	-3.052	-66.65	-60.547	-66.65	-8.301	183.007	0.475	-0.135	1.086	0.781	1.162	1.467	0.857	0.781
183.207	-64.453	-3.296	-66.895	-3.296	-66.528	-60.669	-66.65	-8.423	183.207	0.247	-0.364	0.857	1.086	1.162	1.238	0.704	1.01
183.407	-64.331	-3.54	-66.895	-3.54	-66.65	-60.669	-66.65	-8.667	183.407	0.552	-0.516	0.781	1.086	1.162	1.162	0.857	0.857
183.607	-64.453	-3.784	-66.895	-3.906	-66.65	-60.669	-66.65	-8.789	183.607	0.933	-0.287	1.162	0.857	1.162	1.162	1.162	0.628
183.807	-64.453	-4.15	-66.895	-4.028	-66.65	-60.669	-66.65	-8.911	183.807	0.781	0.17	1.467	0.704	1.162	1.162	1.467	0.475
184.007	-64.453	-4.395	-66.895	-4.395	-66.65	-60.791	-66.772	-9.033	184.007	0.399	0.475	1.086	0.857	1.162	1.162	1.544	0.323
184.207	-64.453	-4.639	-66.895	-4.517	-66.528	-60.791	-66.772	-9.155	184.207	0.399	0.552	0.475	1.086	1.162	1.162	1.162	0.399
184.407	-64.453	-4.883	-66.895	-4.883	-66.65	-60.791	-66.65	-9.277	184.407	0.704	0.475	0.399	1.162	1.162	1.162	0.781	0.781
184.607	-64.453	-5.127	-66.895	-5.127	-66.528	-60.791	-66.65	-9.521	184.607	0.781	0.323	0.704	1.086	1.238	1.162	0.857	1.086
184.807	-64.453	-5.371	-66.895	-5.371	-66.65	-60.913	-66.65	-9.644	184.807	0.704	0.399	0.704	0.781	1.391	1.162	1.086	1.086
185.007	-64.453	-5.615	-66.895	-5.737	-66.65	-60.913	-66.65	-9.766	185.007	0.857	0.704	0.399	0.323	1.315	1.162	1.162	0.857
185.207	-64.453	-5.859	-66.895	-5.981	-66.528	-60.913	-66.65	-9.888	185.207	1.01	0.704	0.399	0.094	1.086	1.162	1.162	0.781
185.407	-64.453	-6.104	-66.895	-6.104	-66.65	-61.035	-66.65	-10.132	185.407	0.781	0.323	0.781	0.323	1.238	1.162	1.162	1.162
185.607	-64.453	-6.47	-66.895	-6.47	-66.65	-60.913	-66.65	-10.254	185.607	0.399	0.018	1.01	0.781	1.544	1.162	1.086	1.467
185.807	-64.331	-6.714	-66.772	-6.714	-66.528	-60.913	-66.65	-10.376	185.807	0.399	-0.059	0.857	1.01	1.467	1.162	0.857	1.162
186.007	-64.453	-6.836	-66.895	-6.958	-66.528	-61.035	-66.65	-10.498	186.007	0.781	0.018	0.704	0.781	1.238	1.162	0.704	0.781
186.207	-64.453	-7.202	-66.895	-7.202	-66.528	-61.157	-66.772	-10.742	186.207	1.086	0.247	0.857	0.399	1.238	1.162	0.857	0.857
186.407	-64.453	-7.446	-66.895	-7.324	-66.65	-61.157	-66.772	-10.864	186.407	1.162	0.475	1.01	0.399	1.467	1.162	1.086	1.086
186.607	-64.331	-7.69	-66.895	-7.568	-66.65	-61.157	-66.65	-11.108	186.607	1.162	0.552	0.857	0.704	1.62	1.162	1.162	1.086
186.807	-64.453	-7.935	-66.772	-7.935	-66.65	-61.157	-66.65	-11.23	186.807	1.162	0.552	0.704	0.704	1.467	1.162	1.162	0.857
187.007	-64.453	-8.179	-66.895	-8.179	-66.65	-61.279	-66.65	-11.353	187.007	1.162	0.552	0.857	0.323	1.238	1.162	1.162	0.704
187.207	-64.453	-8.423	-66.895	-8.423	-66.65	-61.157	-66.65	-11.353	187.207	1.238	0.475	1.01	0.094	1.162	1.162	1.162	0.857
187.407	-64.453	-8.667	-66.895	-8.667	-66.65	-61.157	-66.772	-11.597	187.407	1.467	0.247	0.857	0.17	1.162	1.162	1.162	1.086
187.607	-64.453	-8.911	-66.895	-8.911	-66.65	-61.279	-66.65	-11.719	187.607	1.62	0.018	0.704	0.094	1.238	1.162	1.238	1.086
187.807	-64.453	-9.155	-66.895	-9.033	-66.65	-61.279	-66.772	-11.841	187.807	1.467	0.018	0.857	-0.211	1.467	1.086	1.467	0.857
188.007	-64.453	-9.399	-66.895	-9.277	-66.65	-61.401	-66.772	-11.963	188.007	1.238	0.247	1.01	-0.211	1.62	0.857	1.62	0.704
188.207	-64.453	-9.644	-66.895	-9.521	-66.65	-61.401	-66.772	-12.207	188.207	1.238	0.399	0.781	0.17	1.467	0.704	1.467	0.857
188.407	-64.453	-9.888	-66.895	-9.766	-66.528	-61.401	-66.772	-12.207	188.407	1.467	0.323	0.323	0.475	1.162	0.857	1.238	1.086
188.607	-64.453	-10.132	-66.895	-9.888	-66.528	-61.401	-66.772	-12.451	188.607	1.62	0.399	0.094	0.552	0.857	1.086	1.162	1.162
188.807	-64.575	-10.376	-66.772	-10.254	-66.528	-61.523	-66.772	-12.573	188.807	1.467	0.704	0.247	0.552	0.704	1.086	1.162	1.162
189.007	-64.453	-10.62	-66.895	-10.376	-66.528	-61.523	-66.772	-12.695	189.007	1.238	0.781	0.399	0.628	0.781	0.857	1.162	1.162
189.207	-64.453	-10.742	-66.895	-10.62	-66.528	-61.523	-66.772	-12.817	189.207	1.238	0.704	0.323	0.781	0.781	0.704	1.162	1.086
189.407	-64.453	-10.986	-66.895	-10.864	-66.528	-61.523	-66.772	-13.062	189.407	1.467	0.781	0.323	0.704	0.628	0.857	1.162	0.781
189.607	-64.453	-11.23	-66.895	-10.986	-66.528	-61.523	-66.772	-13.184	189.607	1.62	0.704	0.475	0.323	0.475	1.086	1.086	0.399
189.807	-64.453	-11.475	-66.895	-11.23	-66.528	-61.646	-66.772	-13.306	189.807	1.467	0.323	0.628	0.018	0.247	1.162	0.857	0.475
190.007	-64.575	-11.597	-66.895	-11.353	-66.65	-61.646	-66.772	-13.428	190.007	1.238	0.018	0.781	-0.059	0.094	1.162	0.704	1.086
190.207	-64.575	-11.841	-66.895	-11.597	-66.65	-61.646	-66.772	-13.55	190.207	1.162	0.018	0.781	-0.059	0.323	1.162	0.933	1.544
190.407	-64.575	-12.085	-66.895	-11.841	-66.528	-61.646	-66.772	-13.794	190.407	1.162	0.247	0.704	0.018	0.781	1.086	1.391	1.544
190.607	-64.575	-12.329	-66.895	-11.963	-66.528	-61.646	-66.772	-13.794	190.607	1.162	0.475	0.857	0.247	1.086	0.857	1.544	1.544
190.807	-64.453	-12.573	-66.895	-12.207	-66.528	-61.646	-66.772	-14.038	190.807	1.162	0.552	1.01	0.399	1.162	0.704	1.086	1.62
191.007	-64.575	-12.695	-66.895	-12.329	-66.528	-61.768	-66.772	-14.16	191.007	1.162	0.552	0.857	0.323	1.086	0.857	0.475	1.467
191.207	-64.575	-12.817	-66.895	-12.573	-66.528	-61.768	-66.772	-14.404	191.207	1.162	0.628	0.628	0.323	0.857	1.086	0.399	1.238
191.407	-64.575	-13.062	-66.895	-12.817	-66.528	-61.768	-66.772	-14.648	191.407	1.162	0.857	0.552	0.475	0.628	1.086	0.781	1.162
191.607	-64.575	-13.184	-66.895	-13.062	-66.528	-61.768	-66.772	-14.648	191.607	1.162	1.086	0.628	0.628	0.552	0.857	1.086	1.162
191.807	-64.453	-13.428	-66.772	-13.184	-66.528	-61.768	-66.772	-14.771	191.807	1.162	1.162	0.781	0.781	0.628	0.704	1.086	1.086
192.007	-64.453	-13.55	-66.895	-13.428	-66.528	-61.768	-66.772	-14.893	192.007	1.162	1.162	0.781	0.781	0.857	0.781	0.857	0.857
192.207	-64.453	-13.794	-66.895	-13.55	-66.528	-61.89	-66.772	-15.137	192.207	1.162	1.162	0.704	0.704	1.162	0.781	0.781	0.628
192.407	-64.575	-13.916	-66.895	-13.794	-66.65	-61.89	-66.772	-15.137	192.407	1.162	1.162	0.857	0.781	1.467	0.704	1.162	0.552
192.607	-64.453	-14.038	-66.895	-13.916	-66.528	-62.012	-66.772	-15.381	192.607	1.162	1.162	1.086	0.704	1.62	0.857	1.467	0.628
192.807	-64.453	-14.282	-66.895	-14.16	-66.528	-61.89	-66.895	-15.503	192.807	1.162	1.162	1.162	0.399	1.391	1.086	1.162	0.857
193.007	-64.453	-14.404	-66.772	-14.282	-66.528	-61.89	-66.772	-15.625	193.007	1.162	1.162	1.162	0.323	0.933	1.086	0.781	1.086
193.207	-64.453	-14.648	-66.772	-14.526	-66.528	-61.89	-66.895	-15.747	193.207	1.162	1.162	1.162	0.475	0.628	0.781	0.781	1.086
193.407	-64.453	-14.771	-66.772	-14.526	-66.528	-62.012	-66.772	-15.747	193.407	1.162	1.162	1.162	0.552	0.475	0.399	0.781	0.857
193.607	-64.453	-15.015	-66.772	-14.771	-66.528	-62.012	-66.772	-15.991	193.607	1.238	1.162	1.162	0.475	0.247	0.399	0.628	0.628
193.807	-64.453	-15.137	-66.772	-15.015	-66.528	-62.012	-66.772	-16.113	193.807	1.467	1.162	1.162	0.323	0.17	0.704	0.552	0.475
194.007	-64.453	-15.259	-66.772	-15.137	-66.528	-62.012	-66.772	-16.235	194.007	1.544	1.238	1.238	0.399	0.628	0.704	0.552	0.323
194.207	-64.453	-15.503	-66.772	-15.259	-66.528	-62.012	-66.772	-16.357	194.207	1.162	1.391	1.467	0.781	1.238	0.323	0.475	0.399
194.407	-64.453	-15.625	-66.895	-15.381	-66.528	-62.134	-66.895	-16.602	194.407	0.857	1.315	1.62	1.01	1.238	0.094	0.247	0.781
194.607	-64.453	-15.869	-66.772	-15.503	-66.528	-62.134	-66.895	-16.724	194.607	1.238	1.01	1.467	0.781	0.552	0.323	0.094	1.01
194.807	-64.453	-15.991	-66.772	-15.625	-66.528	-62.134	-66.895	-16.724	194.807	1.849	0.933	1.238	0.399	0.018	0.781	0.247	0.857
195.007	-64.453	-16.113	-66.895	-15.869	-66.528	-62.134	-66.772	-16.846	195.007	1.925	1.086	1.238	0.323	0.399	1.086	0.399	0.628
195.207	-64.453	-16.357	-66.772	-15.991	-66.528	-62.134	-66.772	-16.968	195.207	1.544	1.162	1.467	0.475	1.086	1.162	0.247	0.475
195.407	-64.575	-16.479	-66.772	-16.235	-66.528	-62.256	-66.772	-17.212	195.407	1.238	1.162	1.62	0.628	1.01	1.162	0.094	0.247
195.607	-64.575	-16.602	-66.895	-16.357	-66.528	-62.256	-66.895	-17.334	195.607	1.162	1.086	1.391	0.781	0.475	1.162	0.323	0.018
195.807	-64.575	-16.724	-66.895	-16.479	-66.528	-62.256	-66.895	-17.456	195.807	1.162	0.857	0.933	0.781	0.399	1.086	0.781	-0.059
196.007	-64.575	-16.846	-66.895	-16.602	-66.528	-62.256	-66.895	-17.578	196.007	1.162	0.704	0.704	0.704	0.781	0.857	1.01	-0.059
196.207	-64.575	-17.09	-66.772	-16.724	-66.406	-62.256	-66.895	-17.822	196.207	1.162	0.857	0.857	0.781	1.01	0.704	0.781	0.018
196.407	-64.453	-17.212	-66.772	-16.846	-66.406	-62.256	-66.895	-17.944	196.407	1.162	1.01	1.086	0.781	0.857	0.781	0.399	0.247
196.607	-64.453	-17.334	-66.895	-16.968	-66.406	-62.256	-66.895	-18.066	196.607	1.162	0.857	1.238	0.704	0.704	0.704	0.399	0.475
196.807	-64.575	-17.456	-66.895	-17.212	-66.528	-62.378	-66.772	-18.188	196.807	1.162	0.704	1.467	0.933	0.857	0.399	0.704	0.552
197.007	-64.453	-17.7	-66.895	-17.334	-66.528	-62.378	-66.895	-18.311	197.007	1.162	0.857	1.62	1.391	1.01	0.399	0.781	0.475
197.207	-64.575	-17.822	-66.895	-17.456	-66.528	-62.378	-66.895	-18.433	197.207	1.162	1.01	1.467	1.544	0.857	0.781	0.704	0.323
197.407	-64.575	-17.944	-66.895	-17.578	-66.528	-62.378	-66.772	-18.555	197.407	1.162	0.933	1.238	1.238	0.704	1.01	0.933	0.399
197.607	-64.575	-18.066	-66.895	-17.7	-66.406	-62.378	-66.772	-18.799	197.607	1.162	1.01	1.162	1.086	0.857	0.857	1.315	0.857
197.807	-64.575	-18.311	-66.895	-17.822	-66.406	-62.5	-66.772	-18.799	197.807	1.086	1.315	1.162	1.315	1.01	0.704	1.238	1.391
198.007	-64.453	-18.311	-66.895	-18.066	-66.528	-62.5	-66.772	-18.921	198.007	0.857	1.315	1.162	1.391	0.857	0.781	0.704	1.544
198.207	-64.575	-18.555	-66.895	-18.188	-66.406	-62.378	-66.772	-19.165	198.207	0.704	0.933	1.162	1.162	0.704	0.704	0.475	1.086
198.407	-64.453	-18.555	-66.895	-18.188	-66.406	-62.378	-66.895	-19.287	198.407	0.857	0.628	1.162	0.857	0.857	0.399	0.781	0.399
198.607	-64.453	-18.799	-66.895	-18.433	-66.528	-62.5	-66.772	-19.409	198.607	1.086	0.552	1.162	0.704	1.086	0.399	1.01	0.018
198.807	-64.575	-18.921	-66.895	-18.433	-66.528	-62.5	-66.895	-19.653	198.807	1.086	0.628	1.162	0.857	1.162	0.781	0.857	-0.059
199.007	-64.575	-19.043	-66.772	-18.677	-66.406	-62.622	-66.772	-19.653	199.007	0.857	0.857	1.162	1.01	1.162	1.086	0.704	-0.059
199.207	-64.453	-19.287	-66.895	-18.799	-66.406	-62.622	-66.772	-19.897	199.207	0.628	1.086	1.162	0.857	1.162	1.162	0.857	0.018
199.407	-64.575	-19.287	-66.895	-18.921	-66.406	-62.622	-66.772	-19.897	199.407	0.552	1.086	1.162	0.704	1.162	1.162	1.01	0.323
199.607	-64.575	-19.531	-66.895	-19.043	-66.528	-62.622	-66.772	-20.02	199.607	0.628	0.781	1.162	0.857	1.162	1.086	0.781	0.704
199.807	-64.453	-19.653	-66.895	-19.165	-66.406	-62.622	-66.772	-20.264	199.807	0.781	0.323	1.162	1.01	1.162	0.933	0.399	0.781
200.007	-64.453	-19.775	-66.895	-19.165	-66.406	-62.622	-66.772	-20.386	200.007	0.704	0.094	1.162	0.857	1.238	0.933	0.399	0.704
200.207	-64.575	-19.897	-66.895	-19.409	-66.406	-62.744	-66.895	-20.63	200.207	0.323	0.399	1.162	0.781	1.467	1.01	0.781	0.857
200.407	-64.575	-20.02	-66.895	-19.531	-66.406	-62.744	-66.895	-20.63	200.407	0.018	1.01	1.238	1.162	1.62	0.933	1.086	1.086
200.607	-64.575	-20.142	-66.895	-19.653	-66.406	-62.744	-66.895	-20.752	200.607	0.018	1.162	1.467	1.544	1.467	1.01	1.086	1.162
200.807	-64.575	-20.264	-66.895	-19.775	-66.406	-62.744	-66.895	-20.874	200.807	0.323	0.628	1.62	1.391	1.238	1.391	0.857	1.086
201.007	-64.575	-20.386	-66.895	-19.897	-66.406	-62.744	-66.772	-20.996	201.007	0.704	0.17	1.467	0.933	1.162	1.62	0.704	0.857
201.207	-64.453	-20.508	-66.895	-20.02	-66.406	-62.744	-66.772	-21.118	201.207	0.704	0.247	1.238	0.704	1.162	1.467	0.857	0.704
201.407	-64.575	-20.63	-66.895	-20.142	-66.406	-62.866	-66.895	-21.362	201.407	0.323	0.399	1.162	0.857	1.162	1.315	1.01	0.857
201.607	-64.575	-20.874	-66.895	-20.264	-66.406	-62.866	-66.772	-21.362	201.607	0.094	0.247	1.086	1.086	1.238	1.467	0.857	1.01
201.807	-64.575	-20.874	-66.895	-20.386	-66.528	-62.744	-66.772	-21.484	201.807	0.247	0.094	0.857	1.162	1.467	1.62	0.704	0.781
202.007	-64.575	-21.118	-66.895	-20.508	-66.406	-62.866	-66.772	-21.606	202.007	0.399	0.247	0.704	1.162	1.62	1.467	0.781	0.399
202.207	-64.575	-21.24	-66.895	-20.508	-66.406	-62.866	-66.772	-21.729	202.207	0.323	0.399	0.781	1.162	1.467	1.315	0.781	0.323
202.407	-64.575	-21.362	-66.895	-20.63	-66.406	-62.866	-66.772	-21.851	202.407	0.399	0.247	0.781	1.162	1.238	1.467	0.781	0.475
202.607	-64.575	-21.484	-66.895	-20.874	-66.406	-62.988	-66.772	-21.973	202.607	0.704	0.018	0.704	1.162	1.162	1.62	1.238	0.628
202.807	-64.575	-21.606	-66.895	-20.996	-66.528	-62.866	-66.772	-22.095	202.807	0.781	0.018	0.933	1.238	1.162	1.467	1.849	0.857
203.007	-64.575	-21.729	-66.895	-21.118	-66.528	-62.988	-66.772	-22.217	203.007	0.704	0.247	1.391	1.467	1.162	1.315	2.001	1.086
203.207	-64.453	-21.851	-66.895	-21.24	-66.406	-62.988	-66.772	-22.339	203.207	0.781	0.399	1.544	1.62	1.162	1.467	1.849	1.086
203.407	-64.453	-21.973	-66.895	-21.362	-66.406	-62.988	-66.772	-22.461	203.407	0.781	0.247	1.086	1.467	1.162	1.544	1.696	0.857
203.607	-64.575	-22.095	-66.895	-21.484	-66.406	-62.988	-66.772	-22.583	203.607	0.704	0.094	0.475	1.238	1.162	1.162	1.391	0.704
203.807	-64.453	-22.217	-66.895	-21.606	-66.528	-63.11	-66.772	-22.705	203.807	0.781	0.323	0.475	1.162	1.162	0.781	0.933	0.933
204.007	-64.453	-22.339	-66.895	-21.729	-66.406	-62.988	-66.895	-22.827	204.007	0.781	0.704	1.01	1.086	1.162	0.857	0.704	1.391
204.207	-64.453	-22.461	-66.895	-21.851	-66.406	-63.11	-66.895	-22.949	204.207	0.704	0.704	1.238	0.781	1.162	1.162	0.857	1.62
204.407	-64.575	-22.583	-66.772	-21.973	-66.406	-63.11	-66.772	-23.071	204.407	0.781	0.399	1.01	0.399	1.162	1.391	1.162	1.467
204.607	-64.453	-22.583	-66.772	-22.095	-66.406	-63.11	-66.772	-23.193	204.607	0.704	0.323	0.857	0.323	1.162	1.315	1.467	1.238
204.807	-64.575	-22.705	-66.895	-22.095	-66.406	-63.11	-66.772	-23.315	204.807	0.399	0.475	0.781	0.475	1.162	1.01	1.62	1.162
205.007	-64.575	-22.827	-66.895	-22.339	-66.406	-63.11	-66.772	-23.438	205.007	0.399	0.552	0.628	0.628	1.238	0.933	1.467	1.162
205.207	-64.453	-22.949	-66.772	-22.339	-66.406	-63.232	-66.895	-23.56	205.207	0.781	0.552	0.552	0.781	1.467	1.086	1.238	1.086
205.407	-64.575	-23.071	-66.772	-22.461	-66.406	-63.232	-66.772	-23.682	205.407	1.086	0.552	0.704	0.781	1.62	1.086	1.162	0.933
205.607	-64.575	-23.193	-66.772	-22.583	-66.406	-63.232	-66.772	-23.804	205.607	1.162	0.475	1.086	0.704	1.467	0.857	1.162	1.01
205.807	-64.575	-23.193	-66.895	-22.705	-66.528	-63.232	-66.772	-23.926	205.807	1.162	0.323	1.238	0.704	1.238	0.704	1.162	1.391
206.007	-64.575	-23.315	-66.772	-22.827	-66.528	-63.232	-66.772	-24.048	206.007	1.086	0.399	0.933	0.399	1.162	0.857	1.162	1.62
206.207	-64.453	-23.438	-66.895	-22.827	-66.406	-63.354	-66.772	-24.17	206.207	0.781	0.704	0.628	-0.135	1.162	1.086	1.162	1.391
206.408	-64.453	-23.56	-66.895	-22.949	-66.406	-63.354	-66.772	-24.292	206.408	0.323	0.781	0.628	-0.211	1.162	1.162	1.162	1.01
206.608	-64.575	-23.682	-66.895	-23.071	-66.406	-63.354	-66.895	-24.414	206.608	0.094	0.628	0.781	0.17	1.162	1.162	1.162	0.933
206.808	-64.575	-23.804	-66.895	-23.193	-66.406	-63.354	-66.895	-24.536	206.808	0.323	0.475	0.781	0.399	1.086	1.162	1.086	1.01
207.008	-64.575	-23.926	-66.772	-23.193	-66.406	-63.354	-66.772	-24.658	207.008	0.781	0.323	0.704	0.247	0.933	1.238	0.857	0.857
207.208	-64.453	-23.926	-66.895	-23.315	-66.406	-63.354	-66.772	-24.78	207.208	1.086	0.475	0.857	0.094	1.01	1.391	0.704	0.781
207.408	-64.575	-24.048	-66.895	-23.315	-66.406	-63.354	-66.772	-24.902	207.408	1.238	1.086	1.086	0.323	1.238	1.315	0.857	1.162
207.608	-64.453	-24.17	-66.895	-23.438	-66.406	-63.354	-66.772	-25.024	207.608	1.467	1.467	1.086	0.704	1.162	1.01	1.086	1.467
207.808	-64.575	-24.292	-66.772	-23.56	-66.406	-63.477	-66.772	-25.146	207.808	1.62	1.086	0.781	0.781	1.086	1.01	1.162	1.086
208.008	-64.575	-24.414	-66.895	-23.682	-66.406	-63.477	-66.772	-25.269	208.008	1.467	0.475	0.399	0.628	1.315	1.391	1.162	0.475
208.208	-64.453	-24.536	-66.772	-23.804	-66.406	-63.477	-66.772	-25.391	208.208	1.162	0.323	0.399	0.475	1.391	1.62	1.162	0.399
208.408	-64.575	-24.536	-66.772	-23.804	-66.528	-63.477	-66.772	-25.513	208.408	0.857	0.399	0.781	0.323	1.162	1.544	1.162	0.781
208.608	-64.575	-24.78	-66.895	-23.926	-66.406	-63.477	-66.65	-25.635	208.608	0.704	0.247	1.086	0.323	0.857	1.544	1.238	1.086
208.808	-64.453	-24.78	-66.895	-24.048	-66.406	-63.477	-66.65	-25.757	208.808	0.857	0.094	1.162	0.399	0.704	1.62	1.544	1.162
209.008	-64.575	-24.78	-66.895	-24.17	-66.406	-63.477	-66.65	-25.879	209.008	1.162	0.399	1.086	0.323	0.781	1.467	1.925	1.162
209.208	-64.575	-24.902	-66.772	-24.292	-66.406	-63.477	-66.65	-26.001	209.208	1.467	1.086	0.857	0.323	0.704	1.238	1.849	1.086
209.408	-64.575	-25.024	-66.895	-24.414	-66.406	-63.599	-66.65	-26.123	209.408	1.62	1.544	0.704	0.399	0.399	1.162	1.238	0.857
209.608	-64.575	-25.146	-66.772	-24.536	-66.406	-63.599	-66.65	-26.245	209.608	1.467	1.467	0.857	0.323	0.399	1.162	0.781	0.704
209.808	-64.575	-25.269	-66.895	-24.658	-66.406	-63.599	-66.65	-26.489	209.808	1.238	1.238	1.086	0.399	0.781	1.086	0.857	0.933
210.008	-64.575	-25.391	-66.895	-24.78	-66.528	-63.721	-66.65	-26.611	210.008	1.162	1.162	1.086	0.704	1.01	0.857	1.086	1.391
210.208	-64.575	-25.513	-66.895	-24.78	-66.406	-63.599	-66.772	-26.733	210.208	1.162	1.162	0.781	0.704	0.857	0.628	1.086	1.62
210.408	-64.575	-25.635	-66.772	-25.024	-66.406	-63.599	-66.772	-26.733	210.408	1.238	1.162	0.323	0.399	0.704	0.552	0.857	1.391
210.608	-64.453	-25.635	-66.772	-25.024	-66.528	-63.721	-66.772	-26.855	210.608	1.391	1.162	0.094	0.399	0.857	0.628	0.781	0.857
210.808	-64.453	-25.757	-66.772	-25.146	-66.406	-63.721	-66.772	-26.978	210.808	1.315	1.162	0.323	0.781	1.086	0.781	1.162	0.399
211.008	-64.575	-25.879	-66.772	-25.269	-66.406	-63.721	-66.772	-27.1	211.008	1.086	1.086	0.704	1.086	1.086	0.781	1.544	0.399
211.208	-64.575	-26.001	-66.772	-25.391	-66.406	-63.721	-66.772	-27.222	211.208	1.238	0.857	0.781	1.162	0.857	0.704	1.467	0.781
211.408	-64.575	-26.001	-66.772	-25.513	-66.406	-63.721	-66.65	-27.344	211.408	1.544	0.704	0.704	1.086	0.704	0.781	1.238	1.01
211.608	-64.575	-26.123	-66.772	-25.513	-66.406	-63.843	-66.65	-27.466	211.608	1.467	0.933	0.933	0.781	0.781	0.781	1.162	0.857
211.808	-64.453	-26.245	-66.772	-25.635	-66.406	-63.721	-66.772	-27.588	211.808	1.238	1.391	1.315	0.323	0.704	0.704	1.162	0.628
212.008	-64.575	-26.245	-66.772	-25.757	-66.406	-63.843	-66.65	-27.71	212.008	1.162	1.62	1.315	0.094	0.399	0.857	1.162	0.552
212.208	-64.575	-26.367	-66.772	-25.757	-66.284	-63.843	-66.65	-27.71	212.208	1.162	1.467	1.01	0.247	0.323	1.086	1.162	0.552
212.408	-64.575	-26.367	-66.772	-25.879	-66.284	-63.843	-66.65	-27.832	212.408	1.162	1.238	1.01	0.475	0.475	1.086	1.162	0.552
212.608	-64.575	-26.489	-66.772	-26.001	-66.406	-63.965	-66.65	-27.954	212.608	1.162	1.086	1.391	0.628	0.552	0.781	1.162	0.628
212.808	-64.575	-26.489	-66.772	-26.001	-66.406	-63.843	-66.65	-28.076	212.808	1.162	0.857	1.62	0.781	0.475	0.475	1.162	0.781
213.008	-64.453	-26.733	-66.772	-26.123	-66.406	-63.843	-66.772	-28.198	213.008	1.162	0.704	1.544	0.704	0.323	0.704	1.162	0.704
213.208	-64.575	-26.855	-66.772	-26.245	-66.406	-63.843	-66.772	-28.32	213.208	1.162	0.933	1.544	0.399	0.399	1.162	1.162	0.399
213.408	-64.575	-26.978	-66.772	-26.245	-66.406	-63.843	-66.65	-28.442	213.408	1.162	1.391	1.62	0.399	0.781	1.086	1.086	0.475
213.608	-64.575	-26.978	-66.772	-26.367	-66.284	-63.965	-66.772	-28.564	213.608	1.238	1.62	1.467	0.781	1.086	0.781	0.781	1.086
213.808	-64.575	-27.1	-66.772	-26.489	-66.284	-63.965	-66.772	-28.564	213.808	1.544	1.467	1.238	1.01	1.162	0.857	0.399	1.544
214.008	-64.575	-27.222	-66.772	-26.489	-66.284	-63.965	-66.65	-28.687	214.008	1.925	1.238	1.162	0.781	1.162	1.086	0.399	1.391
214.208	-64.575	-27.344	-66.772	-26.489	-66.284	-63.965	-66.772	-28.809	214.208	1.925	1.162	1.162	0.399	1.086	1.086	0.781	0.933
214.408	-64.575	-27.344	-66.772	-26.611	-66.284	-63.965	-66.772	-28.931	214.408	1.544	1.086	1.162	0.399	0.781	0.857	1.01	0.628
214.608	-64.575	-27.466	-66.772	-26.733	-66.284	-63.965	-66.772	-29.053	214.608	1.315	0.857	1.162	0.781	0.399	0.704	0.857	0.552
214.808	-64.575	-27.71	-66.772	-26.855	-66.406	-63.965	-66.65	-29.053	214.808	1.467	0.704	1.238	1.086	0.399	0.781	0.704	0.552
215.008	-64.575	-27.71	-66.772	-26.855	-66.284	-64.087	-66.65	-29.297	215.008	1.544	0.857	1.467	1.162	0.704	0.704	0.857	0.552
215.208	-64.575	-27.954	-66.772	-26.978	-66.284	-63.965	-66.65	-29.419	215.208	1.162	1.086	1.62	1.162	0.704	0.399	1.01	0.552
215.408	-64.575	-27.954	-66.65	-27.1	-66.284	-63.965	-66.65	-29.541	215.408	0.781	1.162	1.467	1.086	0.399	0.399	0.857	0.475
215.608	-64.575	-27.954	-66.772	-27.222	-66.284	-64.087	-66.65	-29.663	215.608	0.857	1.162	1.238	0.781	0.323	0.781	0.628	0.323
215.808	-64.575	-28.076	-66.772	-27.222	-66.406	-63.965	-66.65	-29.663	215.808	1.01	1.162	1.238	0.475	0.475	1.01	0.552	0.323
216.008	-64.575	-28.198	-66.772	-27.344	-66.406	-64.087	-66.65	-29.907	216.008	0.933	1.162	1.467	0.704	0.628	0.781	0.552	0.475
216.208	-64.575	-28.198	-66.772	-27.588	-66.406	-64.087	-66.65	-29.907	216.208	1.086	1.086	1.62	1.238	0.781	0.399	0.552	0.552
216.408	-64.575	-28.32	-66.65	-27.588	-66.406	-64.087	-66.65	-30.151	216.408	1.62	0.857	1.467	1.391	0.781	0.399	0.628	0.475
216.608	-64.575	-28.442	-66.772	-27.588	-66.406	-64.087	-66.65	-30.151	216.608	1.772	0.704	1.238	1.238	0.704	0.704	0.857	0.323
216.808	-64.575	-28.442	-66.772	-27.832	-66.406	-64.087	-66.772	-30.273	216.808	1.238	0.857	1.238	1.238	0.857	0.781	1.01	0.323
217.008	-64.575	-28.564	-66.65	-27.832	-66.284	-64.087	-66.65	-30.396	217.008	0.781	1.086	1.467	1.467	1.162	0.628	0.857	0.399
217.208	-64.575	-28.564	-66.772	-27.954	-66.406	-64.087	-66.65	-30.518	217.208	0.857	1.162	1.62	1.62	1.467	0.628	0.628	0.247
217.408	-64.575	-28.687	-66.772	-28.076	-66.406	-64.087	-66.65	-30.64	217.408	1.01	1.162	1.544	1.391	1.62	0.857	0.628	0.094
217.608	-64.575	-28.809	-66.772	-28.076	-66.406	-64.209	-66.65	-30.64	217.608	0.781	1.162	1.544	0.933	1.467	0.933	0.933	0.323
217.808	-64.575	-28.931	-66.772	-28.198	-66.284	-64.209	-66.65	-30.762	217.808	0.399	1.162	1.62	0.704	1.238	0.628	1.238	0.704
218.008	-64.697	-28.931	-66.772	-28.32	-66.284	-64.209	-66.65	-30.884	218.008	0.475	1.162	1.467	0.857	1.086	0.475	1.01	0.704
218.208	-64.575	-29.053	-66.65	-28.442	-66.406	-64.209	-66.65	-31.006	218.208	1.086	1.162	1.238	1.01	0.857	0.781	0.475	0.399
218.408	-64.453	-29.175	-66.65	-28.442	-66.284	-64.209	-66.65	-31.128	218.408	1.467	1.162	1.162	0.857	0.781	1.01	0.399	0.399
218.608	-64.575	-29.175	-66.65	-28.564	-66.284	-64.209	-66.65	-31.25	218.608	1.086	1.162	1.162	0.704	1.162	0.781	0.704	0.704
218.808	-64.575	-29.297	-66.772	-28.564	-66.406	-64.209	-66.65	-31.372	218.808	0.475	1.162	1.238	0.857	1.544	0.323	0.781	0.781
219.008	-64.575	-29.419	-66.772	-28.687	-66.284	-64.209	-66.772	-31.494	219.008	0.323	1.086	1.467	1.086	1.467	0.094	0.704	0.628
219.208	-64.453	-29.419	-66.772	-28.809	-66.284	-64.209	-66.772	-31.616	219.208	0.475	0.857	1.62	1.162	1.315	0.247	0.857	0.475
219.408	-64.575	-29.541	-66.772	-28.809	-66.284	-64.209	-66.65	-31.616	219.408	0.552	0.628	1.467	1.162	1.544	0.475	1.01	0.399
219.608	-64.575	-29.663	-66.772	-28.931	-66.284	-64.209	-66.772	-31.738	219.608	0.552	0.552	1.238	1.086	1.925	0.628	0.781	0.628
219.808	-64.575	-29.785	-66.772	-29.053	-66.284	-64.209	-66.772	-31.86	219.808	0.628	0.552	1.162	0.857	1.925	0.857	0.399	0.857
220.008	-64.575	-29.907	-66.772	-29.175	-66.284	-64.209	-66.772	-31.982	220.008	0.781	0.475	1.162	0.628	1.544	1.086	0.399	0.552
220.208	-64.575	-30.029	-66.772	-29.175	-66.284	-64.209	-66.65	-32.104	220.208	0.781	0.399	1.162	0.552	1.315	1.086	0.781	0.17
220.408	-64.575	-30.029	-66.772	-29.297	-66.284	-64.209	-66.65	-32.104	220.408	0.628	0.704	1.162	0.628	1.467	0.857	1.086	0.323
220.608	-64.697	-30.151	-66.772	-29.419	-66.284	-64.209	-66.65	-32.227	220.608	0.475	1.238	1.162	0.857	1.62	0.704	1.086	0.704
220.808	-64.575	-30.273	-66.772	-29.419	-66.284	-64.331	-66.65	-32.349	220.808	0.323	1.315	1.162	1.086	1.467	0.857	0.857	0.781
221.008	-64.575	-30.273	-66.772	-29.541	-66.284	-64.331	-66.65	-32.471	221.008	0.399	0.933	1.238	1.162	1.315	1.086	0.704	0.704
221.208	-64.575	-30.396	-66.772	-29.663	-66.284	-64.331	-66.65	-32.593	221.208	0.704	0.704	1.467	1.162	1.467	1.162	0.857	0.781
221.408	-64.575	-30.518	-66.772	-29.785	-66.284	-64.331	-66.65	-32.593	221.408	0.704	0.781	1.62	1.162	1.544	1.162	1.086	0.704
221.608	-64.575	-30.518	-66.772	-29.785	-66.284	-64.453	-66.65	-32.715	221.608	0.323	0.704	1.467	1.162	1.162	1.238	1.162	0.323
221.808	-64.575	-30.64	-66.772	-29.907	-66.284	-64.331	-66.65	-32.837	221.808	0.094	0.323	1.162	1.162	0.857	1.544	1.238	0.094
222.008	-64.575	-30.64	-66.772	-29.907	-66.284	-64.453	-66.528	-32.959	222.008	0.247	0.018	0.857	1.238	1.162	1.925	1.467	0.247
222.208	-64.697	-30.762	-66.772	-30.029	-66.284	-64.331	-66.528	-33.081	222.208	0.399	-0.059	0.704	1.391	1.544	1.925	1.62	0.475
222.408	-64.697	-30.884	-66.772	-30.151	-66.284	-64.331	-66.65	-33.203	222.408	0.399	-0.059	0.857	1.238	1.391	1.62	1.467	0.552
222.608	-64.697	-31.006	-66.65	-30.273	-66.284	-64.453	-66.65	-33.325	222.608	0.628	-0.059	0.933	0.628	0.933	1.544	1.238	0.552
222.808	-64.575	-31.006	-66.65	-30.273	-66.284	-64.453	-66.528	-33.447	222.808	0.857	0.018	0.552	0.17	0.781	1.62	1.162	0.552
223.008	-64.575	-31.128	-66.772	-30.396	-66.406	-64.453	-66.528	-33.569	223.008	0.628	0.247	0.247	0.323	1.238	1.391	1.162	0.552
223.208	-64.575	-31.25	-66.772	-30.518	-66.406	-64.453	-66.528	-33.691	223.208	0.475	0.399	0.475	0.781	1.925	0.933	1.162	0.552
223.408	-64.575	-31.372	-66.772	-30.64	-66.406	-64.453	-66.528	-33.813	223.408	0.704	0.323	0.704	1.01	2.23	0.781	1.162	0.552
223.608	-64.575	-31.494	-66.65	-30.64	-66.406	-64.453	-66.528	-33.813	223.608	0.781	0.399	0.704	0.781	2.001	1.086	1.162	0.552
223.808	-64.575	-31.494	-66.772	-30.762	-66.406	-64.453	-66.65	-34.058	223.808	0.704	0.781	0.857	0.399	1.544	1.238	1.162	0.552
224.008	-64.575	-31.616	-66.65	-30.762	-66.406	-64.453	-66.65	-34.058	224.008	0.857	1.086	1.01	0.399	1.238	1.01	1.162	0.628
224.208	-64.575	-31.494	-66.772	-30.884	-66.406	-64.453	-66.528	-34.302	224.208	1.086	1.086	0.781	0.704	1.162	0.933	1.162	0.857
224.408	-64.575	-31.494	-66.772	-31.006	-66.406	-64.453	-66.528	-34.302	224.408	1.086	0.781	0.323	0.704	1.238	1.01	1.238	1.086
224.608	-64.453	-31.616	-66.65	-31.006	-66.406	-64.575	-66.528	-34.424	224.608	0.781	0.399	0.094	0.399	1.467	0.857	1.467	1.162
224.808	-64.575	-31.738	-66.772	-31.25	-66.284	-64.453	-66.528	-34.546	224.808	0.323	0.399	0.247	0.475	1.62	0.704	1.62	1.162
225.008	-64.453	-31.738	-66.772	-31.25	-66.284	-64.575	-66.65	-34.546	225.008	0.094	0.704	0.475	1.01	1.467	0.857	1.467	1.162
225.208	-64.453	-31.86	-66.772	-31.372	-66.284	-64.575	-66.528	-34.79	225.208	0.323	0.781	0.628	1.162	1.238	1.086	1.315	1.162
225.408	-64.453	-31.86	-66.65	-31.372	-66.406	-64.575	-66.65	-34.912	225.408	0.781	0.628	0.857	0.704	1.162	1.162	1.544	1.162
225.608	-64.453	-31.982	-66.65	-31.372	-66.284	-64.575	-66.65	-34.912	225.608	1.086	0.552	1.086	0.475	1.162	1.238	1.925	1.162
225.808	-64.453	-31.982	-66.772	-31.616	-66.284	-64.575	-66.65	-35.034	225.808	1.162	0.628	1.086	0.781	1.162	1.467	1.925	1.238
226.008	-64.453	-32.104	-66.772	-31.738	-66.284	-64.575	-66.528	-35.156	226.008	1.162	0.857	0.857	1.01	1.162	1.62	1.544	1.391
226.208	-64.575	-32.227	-66.65	-31.738	-66.284	-64.575	-66.65	-35.156	226.208	1.086	1.086	0.704	0.857	1.162	1.467	1.238	1.315
226.408	-64.575	-32.349	-66.772	-31.738	-66.284	-64.575	-66.65	-35.278	226.408	0.781	1.162	0.857	0.704	1.162	1.238	1.162	1.01
226.608	-64.575	-32.471	-66.772	-31.86	-66.284	-64.575	-66.528	-35.4	226.608	0.399	1.162	1.01	0.857	1.238	1.162	1.162	0.857
226.808	-64.453	-32.593	-66.772	-31.982	-66.284	-64.697	-66.528	-35.522	226.808	0.399	1.162	0.781	1.01	1.467	1.162	1.162	0.781
227.008	-64.575	-32.593	-66.772	-31.982	-66.284	-64.575	-66.65	-35.645	227.008	0.704	1.162	0.323	0.857	1.544	1.238	1.162	0.704
227.208	-64.575	-32.715	-66.772	-32.104	-66.284	-64.575	-66.528	-35.767	227.208	0.781	1.162	0.018	0.628	1.162	1.391	1.162	0.857
227.408	-64.575	-32.837	-66.65	-32.227	-66.284	-64.575	-66.528	-35.767	227.408	0.704	1.086	-0.059	0.552	0.781	1.315	1.162	1.162
227.608	-64.575	-32.959	-66.772	-32.349	-66.284	-64.697	-66.528	-35.889	227.608	0.933	0.857	0.018	0.628	0.781	1.01	1.238	1.467
227.808	-64.575	-32.959	-66.65	-32.349	-66.406	-64.697	-66.528	-36.011	227.808	1.391	0.628	0.323	0.781	0.857	1.01	1.467	1.62
228.008	-64.575	-33.081	-66.772	-32.471	-66.284	-64.697	-66.528	-36.133	228.008	1.62	0.552	0.781	0.781	0.933	1.391	1.62	1.467
228.208	-64.453	-33.081	-66.772	-32.471	-66.284	-64.697	-66.528	-36.255	228.208	1.467	0.628	1.086	0.704	1.01	1.62	1.467	1.238
228.408	-64.575	-33.203	-66.772	-32.593	-66.406	-64.697	-66.528	-36.377	228.408	1.238	0.781	1.01	0.781	0.933	1.467	1.238	1.162
228.608	-64.453	-33.325	-66.65	-32.715	-66.406	-64.697	-66.528	-36.499	228.608	1.162	0.704	0.552	0.781	0.857	1.238	1.162	1.162
228.808	-64.575	-33.325	-66.772	-32.715	-66.284	-64.697	-66.528	-36.499	228.808	1.162	0.475	0.247	0.628	0.781	1.238	1.162	1.238
229.008	-64.453	-33.447	-66.772	-32.837	-66.406	-64.697	-66.528	-36.743	229.008	1.162	0.704	0.475	0.552	0.704	1.391	1.086	1.467
229.208	-64.453	-33.569	-66.772	-32.959	-66.406	-64.697	-66.528	-36.865	229.208	1.162	1.238	0.704	0.628	0.781	1.238	0.781	1.62
229.408	-64.575	-33.569	-66.772	-33.081	-66.406	-64.819	-66.528	-36.865	229.408	1.162	1.315	0.628	0.781	0.781	0.704	0.475	1.467
229.608	-64.575	-33.691	-66.772	-33.203	-66.284	-64.819	-66.528	-37.109	229.608	1.162	0.933	0.552	0.704	0.781	0.399	0.704	1.238
229.808	-64.453	-33.691	-66.772	-33.203	-66.406	-64.819	-66.528	-37.109	229.808	1.162	0.704	0.628	0.323	1.162	0.475	1.238	1.162
230.008	-64.453	-33.691	-66.65	-33.325	-66.284	-64.819	-66.528	-37.231	230.008	1.162	0.857	0.781	0.094	1.467	0.628	1.315	1.162
230.208	-64.453	-33.813	-66.65	-33.447	-66.406	-64.819	-66.528	-37.354	230.208	1.162	1.086	0.781	0.247	1.086	0.857	0.933	1.162
230.408	-64.453	-33.936	-66.65	-33.569	-66.406	-64.819	-66.528	-37.476	230.408	1.238	1.162	0.628	0.399	0.399	1.086	0.781	1.162
230.608	-64.453	-34.058	-66.65	-33.569	-66.406	-64.819	-66.65	-37.476	230.608	1.467	1.162	0.552	0.323	0.094	1.162	1.162	1.162
230.808	-64.453	-34.18	-66.65	-33.691	-66.284	-64.819	-66.528	-37.72	230.808	1.62	1.238	0.552	0.399	0.323	1.086	1.544	1.162
231.008	-64.453	-34.058	-66.65	-33.691	-66.406	-64.819	-66.528	-37.72	231.008	1.544	1.467	0.552	0.704	0.704	0.857	1.467	1.162
231.208	-64.453	-34.18	-66.65	-33.813	-66.406	-64.819	-66.65	-37.842	231.208	1.544	1.62	0.628	0.781	0.781	0.704	1.238	1.086
231.408	-64.453	-34.302	-66.65	-33.936	-66.406	-64.941	-66.528	-37.842	231.408	1.62	1.467	0.857	0.628	0.704	0.857	1.162	0.933
231.608	-64.575	-34.424	-66.65	-33.936	-66.284	-64.819	-66.65	-38.086	231.608	1.391	1.162	1.086	0.552	0.781	1.01	1.162	1.01
231.808	-64.453	-34.546	-66.65	-34.058	-66.406	-64.941	-66.65	-38.086	231.808	0.857	0.857	1.162	0.628	0.704	0.857	1.162	1.315
232.008	-64.453	-34.546	-66.65	-34.058	-66.284	-64.941	-66.65	-38.208	232.008	0.399	0.704	1.162	0.857	0.323	0.704	1.162	1.315
232.208	-64.453	-34.668	-66.65	-34.302	-66.284	-64.941	-66.65	-38.33	232.208	0.475	0.933	1.086	1.01	0.094	0.857	1.086	0.933
232.408	-64.575	-34.79	-66.65	-34.302	-66.284	-64.941	-66.65	-38.33	232.408	1.086	1.391	0.857	0.857	0.323	1.01	0.857	0.704
232.608	-64.575	-34.79	-66.65	-34.424	-66.284	-64.941	-66.65	-38.452	232.608	1.544	1.62	0.781	0.628	0.704	0.704	0.704	0.857
232.808	-64.575	-34.912	-66.65	-34.424	-66.284	-64.941	-66.65	-38.574	232.808	1.467	1.467	1.162	0.475	0.781	0.018	0.857	1.01
233.008	-64.575	-34.912	-66.65	-34.546	-66.284	-64.819	-66.528	-38.696	233.008	1.238	1.162	1.544	0.323	0.704	-0.364	1.01	0.781
233.208	-64.575	-35.034	-66.65	-34.668	-66.284	-64.819	-66.65	-38.696	233.208	1.162	0.857	1.467	0.323	0.857	0.018	0.857	0.399
233.408	-64.575	-35.156	-66.65	-34.79	-66.406	-64.941	-66.65	-38.818	233.408	1.086	0.704	1.238	0.475	1.086	0.628	0.628	0.323
233.608	-64.575	-35.156	-66.65	-34.79	-66.284	-64.941	-66.65	-38.94	233.608	0.857	0.857	1.086	0.552	1.086	0.704	0.552	0.475
233.809	-64.575	-35.278	-66.65	-34.912	-66.284	-64.941	-66.528	-38.94	233.809	0.781	1.01	0.857	0.475	0.781	0.399	0.552	0.552
234.009	-64.453	-35.4	-66.65	-34.912	-66.284	-64.941	-66.528	-39.062	234.009	1.162	0.857	0.704	0.323	0.323	0.323	0.552	0.475
234.209	-64.453	-35.4	-66.65	-35.034	-66.284	-64.941	-66.65	-39.185	234.209	1.544	0.704	0.857	0.399	0.17	0.475	0.628	0.323
234.409	-64.453	-35.522	-66.65	-35.156	-66.406	-64.941	-66.65	-39.307	234.409	1.467	0.781	1.086	0.781	0.628	0.628	0.781	0.323
234.609	-64.453	-35.645	-66.65	-35.278	-66.406	-65.063	-66.65	-39.429	234.609	1.315	0.781	1.162	1.086	1.162	0.781	0.704	0.399
234.809	-64.453	-35.645	-66.65	-35.4	-66.406	-64.941	-66.528	-39.429	234.809	1.467	0.704	1.162	1.086	1.086	0.781	0.399	0.323
235.009	-64.453	-35.767	-66.65	-35.4	-66.406	-65.063	-66.528	-39.673	235.009	1.62	0.857	1.238	0.857	0.781	0.704	0.399	0.323
235.209	-64.453	-35.889	-66.528	-35.522	-66.406	-64.941	-66.528	-39.673	235.209	1.467	1.086	1.467	0.704	0.857	0.857	0.781	0.399
235.409	-64.575	-35.889	-66.65	-35.645	-66.406	-64.941	-66.528	-39.795	235.409	1.315	1.162	1.62	0.857	1.086	1.01	1.01	0.323
235.609	-64.453	-36.011	-66.65	-35.645	-66.406	-64.941	-66.528	-39.917	235.609	1.467	1.162	1.467	1.01	1.162	0.857	0.857	0.323
235.809	-64.453	-36.133	-66.65	-35.767	-66.406	-65.063	-66.528	-40.039	235.809	1.62	1.162	1.238	0.857	1.162	0.704	0.704	0.399
236.009	-64.453	-36.133	-66.528	-35.767	-66.406	-64.941	-66.528	-40.161	236.009	1.467	1.086	1.162	0.704	1.162	0.781	0.857	0.323
236.209	-64.453	-36.255	-66.65	-35.767	-66.406	-64.941	-66.528	-40.283	236.209	1.238	0.857	1.162	0.857	1.162	0.704	1.086	0.323
236.409	-64.453	-36.255	-66.65	-35.889	-66.406	-64.941	-66.65	-40.283	236.409	1.162	0.704	1.162	1.086	1.162	0.399	1.162	0.399
236.609	-64.453	-36.377	-66.65	-36.133	-66.406	-65.063	-66.65	-40.527	236.609	1.162	0.857	1.162	1.086	1.162	0.399	1.162	0.247
236.809	-64.453	-36.499	-66.65	-36.133	-66.406	-65.063	-66.65	-40.527	236.809	1.086	1.086	1.162	0.857	1.238	0.781	1.162	0.094
237.009	-64.453	-36.621	-66.65	-36.255	-66.406	-65.063	-66.528	-40.649	237.009	0.857	1.238	1.162	0.704	1.467	1.01	1.086	0.323
237.209	-64.453	-36.621	-66.772	-36.377	-66.284	-65.063	-66.528	-40.771	237.209	0.704	1.391	1.086	0.857	1.544	0.857	0.781	0.781
237.409	-64.575	-36.743	-66.65	-36.377	-66.406	-65.063	-66.528	-40.771	237.409	0.857	1.315	0.857	1.01	1.162	0.704	0.323	1.01
237.609	-64.575	-36.865	-66.65	-36.499	-66.284	-65.186	-66.528	-40.894	237.609	1.01	0.933	0.704	0.857	0.857	0.857	0.094	0.857
237.809	-64.575	-36.865	-66.65	-36.621	-66.284	-65.063	-66.65	-41.016	237.809	0.781	0.704	0.933	0.704	1.162	1.01	0.323	0.704
238.009	-64.575	-36.987	-66.65	-36.621	-66.284	-65.186	-66.528	-41.016	238.009	0.475	1.01	1.391	0.857	1.62	0.857	0.704	0.781
238.209	-64.575	-37.109	-66.65	-36.743	-66.284	-65.186	-66.65	-41.138	238.209	0.628	1.62	1.62	1.086	1.772	0.628	0.781	0.704
238.409	-64.575	-37.109	-66.65	-36.865	-66.284	-65.186	-66.65	-41.138	238.409	0.933	1.772	1.544	1.086	1.696	0.552	0.704	0.399
238.609	-64.575	-37.231	-66.65	-36.987	-66.406	-65.186	-66.528	-41.26	238.609	0.857	1.238	1.544	0.857	1.544	0.552	0.781	0.323
238.809	-64.575	-37.231	-66.65	-36.987	-66.284	-65.186	-66.65	-41.382	238.809	0.552	0.781	1.544	0.704	1.544	0.552	0.704	0.475
239.009	-64.575	-37.354	-66.65	-37.231	-66.284	-65.186	-66.65	-41.382	239.009	0.323	0.781	1.238	0.781	1.62	0.628	0.323	0.628
239.209	-64.575	-37.476	-66.65	-37.231	-66.284	-65.186	-66.528	-41.504	239.209	0.399	0.704	1.162	0.781	1.467	0.857	0.094	0.781
239.409	-64.453	-37.598	-66.65	-37.354	-66.284	-65.186	-66.528	-41.626	239.409	0.704	0.323	1.62	0.704	1.238	1.086	0.323	0.781
239.609	-64.453	-37.598	-66.528	-37.476	-66.284	-65.186	-66.65	-41.748	239.609	0.704	0.094	1.849	0.933	1.162	1.162	0.781	0.704
239.809	-64.453	-37.72	-66.65	-37.476	-66.284	-65.186	-66.528	-41.748	239.809	0.399	0.323	1.544	1.391	1.162	1.162	1.01	0.781
240.009	-64.575	-37.842	-66.65	-37.598	-66.284	-65.186	-66.528	-41.992	240.009	0.399	0.704	1.238	1.696	1.238	1.238	0.857	0.704
240.209	-64.453	-37.964	-66.65	-37.72	-66.284	-65.186	-66.528	-41.992	240.209	0.704	0.781	1.162	1.772	1.467	1.467	0.704	0.399
240.409	-64.575	-37.842	-66.65	-37.72	-66.406	-65.186	-66.528	-42.114	240.409	0.704	0.704	1.162	1.696	1.696	1.62	0.781	0.399
240.609	-64.575	-37.964	-66.65	-37.72	-66.406	-65.186	-66.406	-42.236	240.609	0.323	0.857	1.162	1.467	1.772	1.467	0.781	0.781
240.809	-64.575	-38.086	-66.65	-37.964	-66.406	-65.186	-66.528	-42.358	240.809	0.094	1.086	1.162	1.238	1.772	1.238	0.704	1.01
241.009	-64.453	-38.086	-66.65	-37.964	-66.406	-65.186	-66.528	-42.48	241.009	0.323	1.162	1.162	1.162	1.849	1.238	0.857	0.857
241.209	-64.453	-38.208	-66.65	-38.086	-66.406	-65.186	-66.65	-42.603	241.209	0.704	1.162	1.162	1.162	2.078	1.544	1.162	0.704
241.409	-64.453	-38.208	-66.528	-38.208	-66.284	-65.186	-66.528	-42.603	241.409	0.704	1.162	1.086	1.162	2.23	1.925	1.467	0.857
241.609	-64.331	-38.33	-66.65	-38.33	-66.284	-65.186	-66.528	-42.725	241.609	0.399	1.162	0.857	1.162	2.001	1.925	1.62	1.086
241.809	-64.453	-38.452	-66.65	-38.452	-66.284	-65.186	-66.528	-42.847	241.809	0.399	1.086	0.628	1.162	1.62	1.62	1.467	1.162
242.009	-64.453	-38.574	-66.65	-38.452	-66.406	-65.186	-66.528	-42.969	242.009	0.704	0.781	0.552	1.162	1.544	1.544	1.238	1.162
242.209	-64.453	-38.574	-66.65	-38.574	-66.406	-65.186	-66.528	-43.091	242.209	0.704	0.323	0.628	1.162	1.696	1.62	1.162	1.162
242.409	-64.453	-38.696	-66.65	-38.574	-66.406	-65.186	-66.528	-43.091	242.409	0.399	0.018	0.857	1.162	1.772	1.467	1.162	1.162
242.609	-64.453	-38.818	-66.65	-38.696	-66.406	-65.186	-66.528	-43.213	242.609	0.399	-0.059	1.01	1.162	1.696	1.238	1.162	1.162
242.809	-64.453	-38.94	-66.65	-38.696	-66.406	-65.186	-66.528	-43.335	242.809	0.704	-0.059	0.857	1.162	1.467	1.162	1.238	1.162
243.009	-64.453	-38.94	-66.65	-38.818	-66.406	-65.186	-66.528	-43.335	243.009	0.781	0.018	0.628	1.162	1.238	1.162	1.467	1.162
243.209	-64.453	-39.062	-66.65	-38.818	-66.406	-65.186	-66.528	-43.579	243.209	0.704	0.323	0.552	1.162	1.162	1.162	1.544	1.162
243.409	-64.453	-39.185	-66.65	-38.94	-66.406	-65.308	-66.528	-43.579	243.409	0.781	0.704	0.552	1.162	1.162	1.162	1.238	1.162
243.609	-64.453	-39.185	-66.65	-39.062	-66.406	-65.186	-66.528	-43.701	243.609	0.704	0.704	0.552	1.162	1.162	1.162	1.086	1.162
243.809	-64.453	-39.307	-66.772	-39.185	-66.406	-65.186	-66.528	-43.701	243.809	0.399	0.399	0.628	1.162	1.162	1.086	1.315	1.162
244.009	-64.453	-39.429	-66.65	-39.307	-66.406	-65.308	-66.528	-43.701	244.009	0.399	0.399	0.857	1.162	1.238	0.857	1.391	1.162
244.209	-64.453	-39.429	-66.65	-39.429	-66.406	-65.308	-66.406	-43.945	244.209	0.781	0.704	1.086	1.162	1.467	0.704	1.238	1.162
244.409	-64.453	-39.429	-66.65	-39.429	-66.406	-65.308	-66.528	-43.945	244.409	1.086	0.781	1.086	1.162	1.62	0.933	1.238	1.162
244.609	-64.453	-39.551	-66.65	-39.551	-66.284	-65.308	-66.406	-44.067	244.609	1.086	0.628	0.781	1.086	1.467	1.467	1.544	1.162
244.809	-64.453	-39.673	-66.65	-39.673	-66.406	-65.308	-66.528	-44.189	244.809	0.781	0.552	0.399	0.857	1.238	1.849	1.925	1.162
245.009	-64.453	-39.795	-66.65	-39.673	-66.406	-65.308	-66.528	-44.312	245.009	0.399	0.628	0.399	0.704	1.162	1.62	2.001	1.162
245.209	-64.575	-39.795	-66.65	-39.795	-66.284	-65.43	-66.528	-44.312	245.209	0.399	0.781	0.704	0.857	1.162	1.086	1.849	1.162
245.409	-64.453	-39.795	-66.65	-39.917	-66.284	-65.308	-66.528	-44.434	245.409	0.781	0.704	0.781	1.01	1.162	0.933	1.696	1.162
245.609	-64.575	-39.917	-66.65	-39.917	-66.284	-65.308	-66.528	-44.556	245.609	1.01	0.399	0.704	0.857	1.162	1.086	1.391	1.315
245.809	-64.453	-39.917	-66.65	-40.039	-66.406	-65.308	-66.528	-44.678	245.809	0.857	0.399	0.857	0.704	1.162	1.162	0.933	1.772
246.009	-64.453	-40.039	-66.65	-40.161	-66.406	-65.308	-66.528	-44.8	246.009	0.628	0.704	1.01	0.857	1.086	1.238	0.704	2.001
246.209	-64.453	-40.161	-66.65	-40.283	-66.406	-65.43	-66.406	-44.8	246.209	0.552	0.704	0.857	1.01	0.857	1.467	0.933	1.467
246.409	-64.453	-40.283	-66.65	-40.405	-66.406	-65.43	-66.406	-44.922	246.409	0.552	0.323	0.704	0.857	0.704	1.62	1.391	0.857
246.609	-64.453	-40.283	-66.65	-40.405	-66.406	-65.308	-66.528	-45.044	246.609	0.552	0.094	0.857	0.628	0.781	1.391	1.62	0.857
246.809	-64.453	-40.405	-66.65	-40.527	-66.406	-65.308	-66.528	-45.166	246.809	0.628	0.323	1.086	0.475	0.704	0.933	1.467	1.01
247.009	-64.453	-40.405	-66.65	-40.527	-66.406	-65.43	-66.528	-45.166	247.009	0.857	0.704	1.162	0.247	0.399	0.704	1.238	0.781
247.209	-64.453	-40.527	-66.65	-40.649	-66.406	-65.308	-66.528	-45.288	247.209	1.086	0.704	1.086	0.094	0.399	0.857	1.238	0.399
247.409	-64.453	-40.771	-66.65	-40.771	-66.406	-65.308	-66.528	-45.41	247.409	1.162	0.399	0.933	0.247	0.781	1.086	1.467	0.399
247.609	-64.453	-40.771	-66.528	-40.894	-66.406	-65.308	-66.528	-45.532	247.609	1.086	0.323	1.01	0.475	1.086	1.086	1.62	0.781
247.809	-64.453	-40.771	-66.65	-40.894	-66.406	-65.308	-66.528	-45.532	247.809	0.857	0.399	1.238	0.552	1.086	0.933	1.467	1.086
248.009	-64.331	-40.894	-66.528	-41.016	-66.406	-65.43	-66.406	-45.654	248.009	0.628	0.247	1.01	0.475	0.781	1.01	1.238	1.162
248.209	-64.453	-40.894	-66.528	-41.138	-66.406	-65.308	-66.528	-45.776	248.209	0.552	0.094	0.475	0.247	0.399	1.315	1.162	1.086
248.409	-64.453	-41.016	-66.528	-41.138	-66.406	-65.308	-66.528	-45.898	248.409	0.704	0.323	0.323	0.094	0.323	1.315	1.162	0.857
248.609	-64.453	-41.138	-66.65	-41.26	-66.528	-65.308	-66.528	-46.021	248.609	1.238	0.704	0.475	0.323	0.399	0.933	1.162	0.704
248.809	-64.453	-41.138	-66.65	-41.26	-66.528	-65.308	-66.528	-46.143	248.809	1.849	0.704	0.628	0.704	0.247	0.781	1.162	0.857
249.009	-64.453	-41.382	-66.65	-41.382	-66.406	-65.308	-66.528	-46.143	249.009	1.849	0.323	0.781	0.704	0.17	1.086	1.162	1.086
249.209	-64.453	-41.382	-66.65	-41.382	-66.528	-65.308	-66.528	-46.143	249.209	1.238	0.094	0.781	0.399	0.628	1.238	1.086	1.162
249.409	-64.453	-41.504	-66.65	-41.504	-66.528	-65.308	-66.528	-46.265	249.409	0.781	0.247	0.704	0.399	1.238	1.01	0.933	1.162
249.609	-64.453	-41.504	-66.528	-41.626	-66.528	-65.43	-66.65	-46.387	249.609	0.857	0.475	0.781	0.781	1.315	0.933	1.01	1.086
249.809	-64.331	-41.626	-66.528	-41.748	-66.406	-65.43	-66.528	-46.387	249.809	1.086	0.628	0.781	1.086	0.857	1.086	1.315	0.857
250.009	-64.453	-41.626	-66.528	-41.748	-66.406	-65.43	-66.528	-46.509	250.009	1.162	0.857	0.628	1.162	0.323	1.162	1.391	0.781
250.209	-64.331	-41.748	-66.528	-41.87	-66.406	-65.43	-66.528	-46.631	250.209	1.162	1.086	0.552	1.162	0.018	1.162	1.238	1.238
250.409	-64.331	-41.748	-66.65	-41.992	-66.406	-65.43	-66.528	-46.631	250.409	1.238	1.162	0.552	1.162	-0.059	1.162	1.238	1.772
250.609	-64.453	-41.87	-66.65	-42.114	-66.406	-65.43	-66.528	-46.753	250.609	1.467	1.086	0.475	1.086	0.018	1.162	1.467	1.62
250.809	-64.453	-41.992	-66.65	-42.114	-66.406	-65.43	-66.528	-46.753	250.809	1.62	0.857	0.323	0.781	0.323	1.086	1.544	1.086
251.009	-64.453	-41.992	-66.65	-42.236	-66.406	-65.43	-66.528	-46.875	251.009	1.467	0.704	0.399	0.399	0.781	0.857	1.162	0.933
251.209	-64.453	-42.114	-66.65	-42.358	-66.284	-65.43	-66.528	-46.997	251.209	1.315	0.857	0.781	0.323	1.01	0.628	0.704	1.086
251.409	-64.453	-42.114	-66.528	-42.48	-66.406	-65.43	-66.528	-47.119	251.409	1.467	1.086	1.086	0.399	0.857	0.552	0.552	1.162
251.609	-64.453	-42.236	-66.528	-42.48	-66.284	-65.43	-66.406	-47.119	251.609	1.62	1.162	1.238	0.323	0.704	0.628	0.628	1.162
251.809	-64.453	-42.358	-66.528	-42.603	-66.406	-65.43	-66.528	-47.241	251.809	1.467	1.238	1.467	0.399	0.857	0.857	0.857	1.162
252.009	-64.453	-42.358	-66.528	-42.725	-66.406	-65.43	-66.528	-47.363	252.009	1.238	1.467	1.62	0.704	1.01	1.01	1.086	1.162
252.209	-64.453	-42.48	-66.65	-42.847	-66.284	-65.43	-66.528	-47.363	252.209	1.238	1.62	1.467	0.704	0.857	0.857	1.162	1.086
252.409	-64.453	-42.48	-66.65	-42.847	-66.406	-65.43	-66.528	-47.485	252.409	1.467	1.467	1.162	0.323	0.704	0.704	1.162	0.857
252.609	-64.453	-42.603	-66.528	-42.969	-66.406	-65.552	-66.528	-47.607	252.609	1.62	1.238	0.933	0.094	0.857	0.781	1.162	0.704
252.809	-64.453	-42.725	-66.528	-43.091	-66.406	-65.43	-66.406	-47.607	252.809	1.467	1.162	1.01	0.323	1.086	0.781	1.162	0.857
253.009	-64.453	-42.847	-66.65	-43.091	-66.406	-65.43	-66.406	-47.729	253.009	1.238	1.086	1.315	0.704	1.086	0.704	1.086	1.086
253.209	-64.453	-42.847	-66.65	-43.213	-66.406	-65.43	-66.406	-47.852	253.209	1.162	0.857	1.391	0.704	0.781	0.857	0.857	1.086
253.409	-64.453	-42.847	-66.65	-43.213	-66.284	-65.552	-66.528	-47.974	253.409	1.162	0.704	1.238	0.323	0.323	1.086	0.704	0.857
253.609	-64.453	-42.969	-66.65	-43.335	-66.406	-65.552	-66.528	-48.096	253.609	1.162	0.857	1.162	0.094	0.094	1.162	0.857	0.781
253.809	-64.453	-43.091	-66.65	-43.457	-66.406	-65.552	-66.528	-48.218	253.809	1.162	1.086	1.238	0.247	0.247	1.086	1.086	1.086
254.009	-64.453	-43.213	-66.65	-43.579	-66.406	-65.43	-66.528	-48.218	254.009	1.238	1.162	1.467	0.399	0.475	0.857	1.086	1.162
254.209	-64.453	-43.213	-66.528	-43.579	-66.406	-65.552	-66.528	-48.34	254.209	1.467	1.162	1.62	0.323	0.628	0.704	0.857	0.628
254.409	-64.453	-43.335	-66.528	-43.579	-66.406	-65.552	-66.528	-48.34	254.409	1.62	1.162	1.544	0.475	0.857	0.781	0.628	0.17
254.609	-64.453	-43.457	-66.528	-43.701	-66.406	-65.552	-66.528	-48.462	254.609	1.544	1.086	1.544	1.086	1.01	0.781	0.475	0.323
254.809	-64.453	-43.579	-66.528	-43.701	-66.406	-65.552	-66.528	-48.584	254.809	1.544	0.933	1.696	1.544	0.857	0.704	0.323	0.781
255.009	-64.331	-43.579	-66.528	-43.823	-66.406	-65.552	-66.528	-48.706	255.009	1.544	1.01	1.772	1.467	0.704	0.857	0.399	1.01
255.209	-64.331	-43.701	-66.528	-43.945	-66.406	-65.552	-66.528	-48.706	255.209	1.086	1.315	1.696	1.315	0.857	1.01	0.781	0.857
255.409	-64.453	-43.823	-66.528	-44.067	-66.406	-65.552	-66.528	-48.706	255.409	0.552	1.391	1.467	1.467	1.086	0.857	1.086	0.704
255.609	-64.453	-43.945	-66.528	-44.189	-66.406	-65.552	-66.528	-48.828	255.609	0.704	1.162	1.162	1.62	1.086	0.704	1.086	0.857
255.809	-64.453	-43.945	-66.528	-44.312	-66.406	-65.552	-66.528	-48.95	255.809	1.238	0.857	0.933	1.391	0.857	0.857	0.857	1.086
256.009	-64.331	-43.945	-66.528	-44.312	-66.406	-65.552	-66.406	-49.072	256.009	1.391	0.704	1.01	0.933	0.704	1.086	0.704	1.086
256.209	-64.453	-44.067	-66.528	-44.434	-66.528	-65.552	-66.528	-49.072	256.209	1.238	0.933	1.315	0.704	0.781	1.162	0.857	0.857
256.409	-64.453	-44.067	-66.528	-44.434	-66.406	-65.552	-66.406	-49.194	256.409	1.162	1.391	1.391	0.857	0.704	1.162	1.086	0.628
256.609	-64.453	-44.189	-66.528	-44.434	-66.406	-65.552	-66.406	-49.316	256.609	1.162	1.62	1.238	1.086	0.399	1.086	1.162	0.475
256.809	-64.453	-44.189	-66.528	-44.556	-66.528	-65.552	-66.406	-49.316	256.809	1.086	1.467	1.162	1.238	0.399	0.857	1.162	0.323
257.009	-64.453	-44.312	-66.528	-44.678	-66.528	-65.552	-66.406	-49.438	257.009	0.857	1.238	1.162	1.544	0.781	0.628	1.162	0.399
257.209	-64.453	-44.312	-66.528	-44.8	-66.528	-65.552	-66.406	-49.561	257.209	0.704	1.162	1.086	1.925	1.086	0.552	1.086	0.704
257.409	-64.453	-44.434	-66.528	-44.8	-66.406	-65.552	-66.406	-49.561	257.409	0.857	1.162	0.857	1.849	1.162	0.628	0.857	0.704
257.609	-64.331	-44.556	-66.65	-44.922	-66.406	-65.552	-66.406	-49.683	257.609	1.01	1.162	0.704	1.238	1.162	0.857	0.628	0.399
257.809	-64.453	-44.556	-66.528	-45.044	-66.406	-65.674	-66.406	-49.805	257.809	0.781	1.162	0.933	0.781	1.162	1.086	0.552	0.323
258.009	-64.453	-44.678	-66.528	-45.166	-66.406	-65.552	-66.406	-49.805	258.009	0.399	1.162	1.467	0.933	1.162	1.162	0.628	0.552
258.209	-64.453	-44.678	-66.528	-45.166	-66.406	-65.552	-66.406	-49.927	258.209	0.399	1.162	1.849	1.391	1.086	1.086	0.857	0.857
258.409	-64.453	-44.8	-66.528	-45.288	-66.406	-65.674	-66.406	-49.927	258.409	0.781	1.162	1.62	1.544	0.857	0.857	1.162	0.933
258.609	-64.331	-44.922	-66.528	-45.41	-66.406	-65.552	-66.406	-50.049	258.609	1.01	1.162	1.086	1.162	0.704	0.628	1.467	0.628
258.809	-64.453	-45.044	-66.528	-45.41	-66.406	-65.552	-66.284	-50.171	258.809	0.781	1.162	0.933	0.781	0.857	0.475	1.544	0.475
259.009	-64.453	-45.044	-66.528	-45.532	-66.406	-65.674	-66.284	-50.171	259.009	0.399	1.162	1.086	0.857	1.086	0.323	1.086	0.781
259.209	-64.453	-45.166	-66.528	-45.654	-66.406	-65.552	-66.406	-50.293	259.209	0.399	1.162	1.162	1.086	1.162	0.399	0.475	1.086
259.409	-64.453	-45.288	-66.528	-45.654	-66.284	-65.552	-66.406	-50.293	259.409	0.704	1.162	1.162	1.162	1.238	0.781	0.323	1.162
259.609	-64.453	-45.288	-66.528	-45.776	-66.406	-65.674	-66.406	-50.537	259.609	0.781	1.162	1.162	1.238	1.467	1.01	0.475	1.162
259.809	-64.453	-45.41	-66.65	-45.898	-66.406	-65.674	-66.406	-50.537	259.809	0.628	1.162	1.162	1.467	1.62	0.857	0.628	1.086
260.009	-64.453	-45.532	-66.528	-46.021	-66.406	-65.674	-66.406	-50.537	260.009	0.475	1.162	1.162	1.62	1.467	0.704	0.781	0.857
260.209	-64.331	-45.532	-66.528	-46.021	-66.406	-65.552	-66.528	-50.659	260.209	0.247	1.086	1.162	1.467	1.238	0.857	0.781	0.704
260.409	-64.453	-45.654	-66.65	-46.143	-66.406	-65.552	-66.528	-50.781	260.409	0.018	0.857	1.238	1.238	1.162	1.01	0.704	0.857
260.609	-64.331	-45.776	-66.528	-46.265	-66.406	-65.674	-66.406	-50.903	260.609	-0.059	0.628	1.467	1.162	1.162	0.857	0.857	1.01
260.809	-64.453	-45.776	-66.528	-46.143	-66.406	-65.674	-66.406	-50.903	260.809	0.018	0.552	1.62	1.238	1.162	0.704	1.01	0.857
261.009	-64.453	-45.898	-66.528	-46.387	-66.528	-65.674	-66.406	-51.025	261.009	0.323	0.552	1.467	1.391	1.162	0.857	0.857	0.628
261.209	-64.453	-46.021	-66.528	-46.387	-66.528	-65.674	-66.406	-51.025	261.209	0.704	0.552	1.238	1.315	1.238	1.086	0.781	0.475
261.41	-64.331	-46.021	-66.528	-46.509	-66.406	-65.674	-66.406	-51.147	261.41	0.704	0.628	1.162	0.933	1.544	1.086	1.162	0.247
261.61	-64.331	-46.143	-66.528	-46.509	-66.406	-65.674	-66.406	-51.147	261.61	0.399	0.857	1.162	0.628	1.925	0.857	1.467	0.094
261.81	-64.331	-46.143	-66.528	-46.631	-66.528	-65.674	-66.406	-51.147	261.81	0.399	1.01	1.086	0.628	1.925	0.704	1.162	0.323
262.01	-64.331	-46.265	-66.528	-46.753	-66.528	-65.796	-66.284	-51.27	262.01	0.704	0.857	0.857	0.857	1.544	0.857	0.781	0.781
262.21	-64.331	-46.265	-66.528	-46.753	-66.406	-65.674	-66.406	-51.392	262.21	0.704	0.628	0.704	1.086	1.238	1.086	0.857	1.01
262.41	-64.453	-46.387	-66.528	-46.875	-66.528	-65.674	-66.406	-51.514	262.41	0.399	0.475	0.857	1.162	1.086	1.162	1.086	0.857
262.61	-64.331	-46.387	-66.528	-46.997	-66.528	-65.674	-66.406	-51.514	262.61	0.399	0.323	1.01	1.162	0.857	1.162	1.162	0.704
262.81	-64.331	-46.509	-66.528	-46.997	-66.528	-65.674	-66.284	-51.514	262.81	0.704	0.399	0.857	1.086	0.704	1.162	1.162	0.857
263.01	-64.331	-46.631	-66.528	-47.119	-66.528	-65.674	-66.284	-51.636	263.01	0.704	0.781	0.628	0.857	0.857	1.162	1.238	1.086
263.21	-64.453	-46.631	-66.528	-47.119	-66.528	-65.674	-66.284	-51.758	263.21	0.323	1.086	0.552	0.704	1.086	1.086	1.467	1.162
263.41	-64.331	-46.753	-66.528	-47.241	-66.528	-65.674	-66.284	-51.88	263.41	0.094	1.086	0.552	0.857	1.086	0.857	1.62	1.162
263.61	-64.331	-46.753	-66.65	-47.363	-66.528	-65.674	-66.284	-51.88	263.61	0.247	0.781	0.475	1.01	0.857	0.704	1.467	1.238
263.81	-64.453	-46.875	-66.528	-47.485	-66.528	-65.674	-66.284	-52.002	263.81	0.399	0.399	0.323	0.857	0.704	0.857	1.315	1.391
264.01	-64.331	-46.997	-66.65	-47.485	-66.528	-65.674	-66.284	-52.002	264.01	0.323	0.399	0.399	0.704	0.857	1.086	1.467	1.315
264.21	-64.331	-46.997	-66.65	-47.607	-66.528	-65.674	-66.284	-52.124	264.21	0.399	0.781	0.704	0.781	1.086	1.162	1.62	1.01
264.41	-64.331	-47.119	-66.528	-47.729	-66.528	-65.674	-66.162	-52.246	264.41	0.857	1.086	0.704	0.704	1.162	1.162	1.467	0.933
264.61	-64.453	-47.119	-66.65	-47.729	-66.528	-65.796	-66.162	-52.246	264.61	1.391	1.086	0.323	0.323	1.162	1.162	1.315	1.01
264.81	-64.453	-47.241	-66.528	-47.852	-66.406	-65.674	-66.284	-52.368	264.81	1.544	0.781	0.018	0.018	1.162	1.162	1.467	0.857
265.01	-64.331	-47.241	-66.65	-47.974	-66.528	-65.674	-66.284	-52.368	265.01	1.162	0.399	0.018	0.018	1.162	1.086	1.62	0.704
265.21	-64.453	-47.241	-66.65	-47.974	-66.528	-65.674	-66.406	-52.49	265.21	0.781	0.399	0.323	0.323	1.162	0.857	1.467	0.857
265.41	-64.331	-47.363	-66.65	-47.974	-66.528	-65.796	-66.284	-52.612	265.41	0.857	0.704	0.704	0.781	1.162	0.704	1.315	1.086
265.61	-64.331	-47.485	-66.65	-48.218	-66.406	-65.796	-66.406	-52.612	265.61	1.01	0.704	0.781	1.086	1.162	0.781	1.544	1.162
265.81	-64.331	-47.607	-66.65	-48.218	-66.406	-65.674	-66.284	-52.734	265.81	0.857	0.399	0.704	1.162	1.162	0.781	2.001	1.238
266.01	-64.331	-47.607	-66.65	-48.34	-66.406	-65.796	-66.284	-52.734	266.01	0.704	0.399	0.857	1.162	1.162	0.704	2.23	1.467
266.21	-64.453	-47.729	-66.65	-48.34	-66.528	-65.796	-66.406	-52.856	266.21	0.781	0.704	1.086	1.162	1.162	0.933	2.001	1.62
266.41	-64.453	-47.852	-66.65	-48.34	-66.528	-65.796	-66.406	-52.979	266.41	0.704	0.704	1.086	1.162	1.162	1.391	1.544	1.467
266.61	-64.453	-47.852	-66.65	-48.462	-66.528	-65.674	-66.406	-52.979	266.61	0.323	0.399	0.857	1.086	1.162	1.62	1.238	1.238
266.81	-64.453	-47.974	-66.65	-48.584	-66.406	-65.796	-66.284	-53.101	266.81	0.094	0.399	0.704	0.857	1.162	1.467	1.162	1.238
267.01	-64.331	-47.974	-66.65	-48.584	-66.528	-65.796	-66.406	-53.101	267.01	0.247	0.704	0.857	0.704	1.162	1.238	1.162	1.391
267.21	-64.331	-48.096	-66.65	-48.706	-66.528	-65.674	-66.406	-53.101	267.21	0.399	0.781	1.086	0.781	1.086	1.162	1.162	1.315
267.41	-64.331	-48.218	-66.528	-48.828	-66.528	-65.674	-66.406	-53.223	267.41	0.323	0.628	1.162	0.704	0.857	1.162	1.162	1.01
267.61	-64.331	-48.218	-66.528	-48.828	-66.528	-65.796	-66.284	-53.345	267.61	0.399	0.552	1.162	0.399	0.781	1.086	1.162	0.933
267.81	-64.331	-48.34	-66.65	-48.95	-66.528	-65.796	-66.284	-53.467	267.81	0.857	0.628	1.01	0.399	1.086	0.857	1.162	1.086
268.01	-64.331	-48.462	-66.65	-48.95	-66.528	-65.796	-66.284	-53.467	268.01	1.391	0.781	0.552	0.628	1.238	0.781	1.162	1.162
268.21	-64.453	-48.462	-66.65	-49.072	-66.528	-65.796	-66.284	-53.467	268.21	1.62	0.704	0.247	0.475	1.01	1.086	1.162	1.238
268.41	-64.453	-48.584	-66.65	-49.194	-66.528	-65.796	-66.406	-53.589	268.41	1.467	0.323	0.552	0.247	0.933	1.238	1.162	1.467
268.61	-64.453	-48.584	-66.528	-49.194	-66.528	-65.796	-66.284	-53.589	268.61	1.238	0.018	0.933	0.552	1.086	1.01	1.162	1.62
268.81	-64.453	-48.706	-66.528	-49.316	-66.528	-65.796	-66.284	-53.711	268.81	1.162	-0.059	0.781	0.933	1.086	0.933	1.162	1.467
269.01	-64.331	-48.828	-66.528	-49.316	-66.528	-65.796	-66.284	-53.833	269.01	1.162	0.018	0.399	0.781	0.781	1.086	1.162	1.162
269.21	-64.453	-48.828	-66.528	-49.438	-66.528	-65.796	-66.284	-53.833	269.21	1.162	0.399	0.399	0.399	0.323	1.162	1.162	0.781
269.41	-64.453	-48.95	-66.65	-49.438	-66.528	-65.796	-66.284	-53.955	269.41	1.238	1.162	0.704	0.399	0.094	1.086	1.162	0.399
269.61	-64.453	-48.95	-66.528	-49.561	-66.528	-65.796	-66.284	-54.077	269.61	1.391	1.772	0.781	0.781	0.323	0.857	1.162	0.399
269.81	-64.453	-48.95	-66.65	-49.683	-66.528	-65.796	-66.284	-54.077	269.81	1.315	1.544	0.704	1.01	0.704	0.704	1.162	0.704
270.01	-64.453	-49.072	-66.528	-49.683	-66.528	-65.796	-66.162	-54.077	270.01	1.086	0.781	0.857	0.781	0.781	0.857	1.238	0.781
270.21	-64.331	-49.194	-66.65	-49.805	-66.528	-65.796	-66.162	-54.199	270.21	1.315	0.552	1.086	0.399	0.704	1.086	1.467	0.704
270.41	-64.331	-49.194	-66.528	-49.805	-66.528	-65.796	-66.162	-54.199	270.41	1.925	1.086	1.162	0.323	0.857	1.162	1.62	0.857
270.61	-64.331	-49.194	-66.528	-49.927	-66.528	-65.918	-66.162	-54.321	270.61	2.23	1.544	1.162	0.399	1.01	1.162	1.467	1.086
270.81	-64.331	-49.438	-66.65	-49.927	-66.528	-65.918	-66.284	-54.321	270.81	2.001	1.467	1.162	0.323	0.857	1.162	1.238	1.162
271.01	-64.331	-49.438	-66.528	-50.049	-66.528	-65.918	-66.162	-54.443	271.01	1.62	1.238	1.162	0.399	0.704	1.086	1.162	1.162
271.21	-64.453	-49.438	-66.65	-50.049	-66.528	-65.918	-66.162	-54.565	271.21	1.62	1.238	1.162	0.704	0.781	0.857	1.086	1.162
271.41	-64.331	-49.561	-66.528	-50.171	-66.528	-65.918	-66.284	-54.565	271.41	1.925	1.391	1.162	0.781	0.781	0.704	0.781	1.086
271.61	-64.331	-49.561	-66.65	-50.293	-66.528	-65.796	-66.284	-54.565	271.61	1.925	1.238	1.086	0.628	0.704	0.857	0.475	0.857
271.81	-64.331	-49.683	-66.65	-50.415	-66.528	-65.796	-66.284	-54.81	271.81	1.544	0.704	0.933	0.552	0.857	1.01	0.781	0.628
272.01	-64.331	-49.805	-66.65	-50.415	-66.528	-65.918	-66.284	-54.81	272.01	1.238	0.475	1.01	0.628	1.086	0.857	1.544	0.552
272.21	-64.331	-49.805	-66.65	-50.537	-66.528	-65.918	-66.162	-54.932	272.21	1.238	0.781	1.238	0.857	1.086	0.628	1.849	0.628
272.41	-64.453	-49.805	-66.65	-50.537	-66.528	-65.918	-66.284	-54.81	272.41	1.467	1.086	1.01	1.086	0.781	0.552	1.544	0.857
272.61	-64.331	-49.927	-66.528	-50.659	-66.528	-65.796	-66.162	-54.81	272.61	1.62	1.162	0.552	1.086	0.475	0.552	1.162	1.01
272.81	-64.331	-49.927	-66.528	-50.781	-66.406	-65.918	-66.284	-54.688	272.81	1.467	1.162	0.781	0.857	0.704	0.475	0.857	0.857
273.01	-64.453	-50.049	-66.528	-50.781	-66.406	-65.918	-66.162	-54.443	273.01	1.238	1.162	1.544	0.704	1.162	0.323	0.704	0.704
273.21	-64.453	-50.171	-66.65	-50.903	-66.528	-65.796	-66.162	-54.321	273.21	1.162	1.162	1.849	0.857	1.01	0.399	0.857	0.857
273.41	-64.453	-50.293	-66.65	-50.903	-66.528	-65.918	-66.284	-54.077	273.41	1.086	1.162	1.544	1.01	0.475	0.781	1.086	1.01
273.61	-64.453	-50.293	-66.65	-51.025	-66.528	-65.918	-66.284	-53.833	273.61	0.857	1.162	1.238	0.933	0.399	1.01	1.086	0.857
273.81	-64.331	-50.293	-66.528	-51.025	-66.528	-65.918	-66.284	-53.467	273.81	0.704	1.162	1.162	0.933	0.704	0.857	0.857	0.704
274.01	-64.453	-50.415	-66.528	-51.147	-66.528	-65.918	-66.284	-53.101	274.01	0.857	1.162	1.162	1.01	0.781	0.704	0.628	0.781
274.21	-64.453	-50.537	-66.528	-51.147	-66.528	-65.796	-66.284	-52.734	274.21	1.086	1.162	1.086	0.857	0.628	0.857	0.552	0.781
274.41	-64.453	-50.659	-66.65	-51.27	-66.528	-65.918	-66.162	-52.368	274.41	1.162	1.162	0.857	0.628	0.552	1.01	0.552	0.628
274.61	-64.453	-50.659	-66.528	-51.27	-66.528	-65.918	-66.284	-52.002	274.61	1.162	1.162	0.781	0.628	0.628	0.857	0.475	0.552
274.81	-64.331	-50.781	-66.528	-51.392	-66.528	-65.918	-66.284	-51.514	274.81	1.238	1.162	1.162	0.857	0.857	0.781	0.247	0.552
275.01	-64.453	-50.781	-66.528	-51.392	-66.528	-65.918	-66.284	-51.025	275.01	1.467	1.162	1.544	1.01	1.01	1.162	0.094	0.552
275.21	-64.453	-50.903	-66.528	-51.514	-66.528	-65.918	-66.162	-50.537	275.21	1.62	1.086	1.467	0.781	0.857	1.544	0.323	0.552
275.41	-64.453	-51.025	-66.65	-51.514	-66.528	-65.796	-66.284	-50.171	275.41	1.544	0.857	1.238	0.399	0.704	1.391	0.781	0.475
275.61	-64.453	-51.025	-66.65	-51.636	-66.528	-65.796	-66.162	-49.683	275.61	1.467	0.704	1.238	0.399	0.857	0.857	1.01	0.323
275.81	-64.453	-51.147	-66.65	-51.636	-66.528	-65.796	-66.162	-49.194	275.81	1.315	0.857	1.467	0.781	1.01	0.399	0.857	0.399
276.01	-64.453	-51.147	-66.528	-51.758	-66.528	-65.796	-66.162	-48.706	276.01	1.01	1.086	1.62	1.01	0.781	0.399	0.628	0.704
276.21	-64.331	-51.27	-66.528	-51.758	-66.528	-65.918	-66.162	-48.218	276.21	0.933	1.162	1.544	0.857	0.399	0.704	0.552	0.704
276.41	-64.331	-51.27	-66.528	-51.88	-66.528	-65.918	-66.162	-47.729	276.41	1.162	1.162	1.544	0.781	0.399	0.781	0.628	0.323
276.61	-64.453	-51.392	-66.528	-51.88	-66.528	-65.918	-66.162	-47.241	276.61	1.544	1.162	1.62	1.162	0.781	0.704	0.857	0.018
276.81	-64.331	-51.514	-66.65	-51.88	-66.528	-65.918	-66.162	-46.753	276.81	1.849	1.086	1.391	1.544	1.086	0.857	1.086	-0.059
277.01	-64.453	-51.514	-66.65	-52.124	-66.528	-65.918	-66.162	-46.265	277.01	1.62	0.857	0.933	1.467	1.238	1.086	1.162	-0.059
277.21	-64.453	-51.636	-66.65	-52.124	-66.528	-65.918	-66.162	-45.776	277.21	1.086	0.704	0.704	1.238	1.467	1.162	1.162	0.018
277.41	-64.453	-51.636	-66.528	-52.246	-66.528	-65.918	-66.162	-45.288	277.41	0.857	0.857	0.857	1.162	1.62	1.086	1.086	0.323
277.61	-64.453	-51.758	-66.528	-52.246	-66.528	-65.918	-66.162	-44.678	277.61	0.704	1.086	1.086	1.162	1.467	0.857	0.781	0.704
277.81	-64.453	-51.758	-66.65	-52.246	-66.528	-65.796	-66.162	-44.312	277.81	0.323	1.162	1.238	1.086	1.238	0.704	0.399	0.704
278.01	-64.331	-51.88	-66.528	-52.49	-66.528	-65.918	-66.162	-43.701	278.01	0.094	1.162	1.467	0.857	1.162	0.857	0.399	0.399
278.21	-64.453	-51.88	-66.528	-52.49	-66.528	-65.918	-66.162	-43.335	278.21	0.323	1.238	1.62	0.781	1.162	1.086	0.781	0.323
278.41	-64.453	-51.88	-66.528	-52.49	-66.528	-65.918	-66.162	-42.847	278.41	0.704	1.467	1.467	1.162	1.086	1.162	1.086	0.399
278.61	-64.453	-52.002	-66.528	-52.734	-66.528	-65.918	-66.162	-42.236	278.61	0.704	1.544	1.238	1.544	0.857	1.162	1.162	0.323
278.81	-64.331	-52.124	-66.528	-52.612	-66.528	-65.918	-66.162	-41.748	278.81	0.323	1.162	1.162	1.467	0.704	1.086	1.086	0.323
279.01	-64.453	-52.124	-66.528	-52.734	-66.528	-65.918	-66.162	-41.26	279.01	0.094	0.781	1.162	1.238	0.857	0.781	0.857	0.475
279.21	-64.453	-52.246	-66.528	-52.734	-66.406	-65.918	-66.162	-40.771	279.21	0.247	0.857	1.086	1.162	1.086	0.399	0.628	0.628
279.41	-64.453	-52.246	-66.528	-52.856	-66.528	-65.918	-66.162	-40.161	279.41	0.399	1.086	0.857	1.162	1.162	0.399	0.628	0.857
279.61	-64.453	-52.368	-66.528	-52.856	-66.406	-65.918	-66.162	-39.673	279.61	0.247	1.162	0.704	1.162	1.162	0.781	0.857	1.01
279.81	-64.575	-52.368	-66.528	-52.979	-66.528	-65.918	-66.284	-39.307	279.81	0.018	1.162	0.933	1.238	1.238	1.086	1.01	0.857
280.01	-64.453	-52.368	-66.65	-53.101	-66.406	-65.918	-66.284	-38.818	280.01	0.018	1.162	1.391	1.467	1.467	1.162	0.933	0.704
280.21	-64.453	-52.49	-66.65	-53.223	-66.406	-65.918	-66.162	-38.208	280.21	0.247	1.086	1.62	1.62	1.62	1.162	0.857	0.781
280.41	-64.453	-52.612	-66.528	-53.223	-66.528	-65.918	-66.162	-37.72	280.41	0.399	0.857	1.467	1.391	1.467	1.162	0.781	0.704
280.61	-64.453	-52.612	-66.65	-53.345	-66.406	-65.918	-66.284	-37.231	280.61	0.247	0.704	1.315	1.01	1.238	1.162	0.704	0.399
280.81	-64.453	-52.734	-66.65	-53.345	-66.528	-65.918	-66.284	-36.621	280.81	0.094	0.857	1.467	1.01	1.162	1.162	0.781	0.399
281.01	-64.453	-52.734	-66.65	-53.345	-66.528	-65.918	-66.284	-36.133	281.01	0.323	1.01	1.62	1.238	1.086	1.238	0.704	0.704
281.21	-64.453	-52.856	-66.65	-53.467	-66.528	-65.918	-66.284	-35.522	281.21	0.704	0.781	1.467	1.086	0.857	1.544	0.399	0.704
281.41	-64.453	-52.856	-66.65	-53.467	-66.406	-65.796	-66.162	-34.912	281.41	0.781	0.399	1.238	0.781	0.781	1.925	0.475	0.247
281.61	-64.331	-52.979	-66.65	-53.589	-66.528	-65.918	-66.162	-34.302	281.61	0.704	0.399	1.162	0.933	1.162	1.925	1.086	-0.211
281.81	-64.453	-53.101	-66.65	-53.589	-66.528	-65.918	-66.162	-33.813	281.81	0.781	0.704	1.086	1.391	1.544	1.62	1.544	-0.211
282.01	-64.453	-53.223	-66.528	-53.711	-66.528	-65.796	-66.162	-33.203	282.01	0.781	0.781	0.857	1.62	1.467	1.62	1.544	0.17
282.21	-64.453	-53.223	-66.528	-53.711	-66.528	-65.918	-66.162	-32.593	282.21	0.704	0.552	0.781	1.467	1.315	1.925	1.544	0.475
282.41	-64.453	-53.345	-66.528	-53.711	-66.528	-65.796	-66.162	-31.86	282.41	0.857	0.17	1.162	1.238	1.467	1.925	1.62	0.552
282.61	-64.453	-53.345	-66.528	-53.833	-66.528	-65.796	-66.162	-31.128	282.61	1.086	-0.211	1.544	1.162	1.62	1.544	1.467	0.628
282.81	-64.453	-53.345	-66.528	-53.833	-66.528	-65.918	-66.162	-30.518	282.81	1.162	-0.287	1.391	1.086	1.544	1.315	1.238	0.857
283.01	-64.453	-53.345	-66.528	-53.955	-66.528	-65.796	-66.162	-29.785	283.01	1.086	-0.135	0.933	0.857	1.544	1.467	1.162	1.086
283.21	-64.453	-53.467	-66.528	-53.955	-66.528	-65.918	-66.284	-28.931	283.21	0.857	0.018	0.704	0.781	1.696	1.62	1.162	1.162
283.41	-64.331	-53.467	-66.528	-54.077	-66.528	-65.918	-66.162	-27.954	283.41	0.704	0.247	0.781	1.086	1.772	1.467	1.162	1.162
283.61	-64.331	-53.589	-66.528	-54.077	-66.528	-65.918	-66.162	-27.222	283.61	0.781	0.399	0.704	1.238	1.696	1.238	1.238	1.162
283.81	-64.453	-53.589	-66.528	-54.077	-66.528	-65.918	-66.162	-26.245	283.81	0.781	0.247	0.399	1.01	1.467	1.086	1.467	1.162
284.01	-64.331	-53.833	-66.528	-54.199	-66.528	-65.918	-66.162	-25.269	284.01	0.704	0.094	0.399	0.933	1.238	0.857	1.696	1.086
284.21	-64.331	-53.833	-66.528	-54.321	-66.528	-65.918	-66.162	-24.17	284.21	0.857	0.323	0.704	1.086	1.162	0.704	1.772	0.857
284.41	-64.331	-53.833	-66.528	-54.321	-66.528	-65.918	-66.162	-23.193	284.41	1.086	0.704	0.781	1.162	1.162	0.857	1.696	0.704
284.61	-64.453	-53.833	-66.65	-54.321	-66.528	-65.918	-66.162	-21.973	284.61	1.162	0.781	0.704	1.162	1.162	1.01	1.467	0.857
284.81	-64.453	-53.955	-66.528	-54.443	-66.528	-65.918	-66.284	-20.752	284.81	1.162	0.704	0.857	1.162	1.162	0.781	1.238	1.086
285.01	-64.453	-53.955	-66.528	-54.443	-66.528	-65.918	-66.162	-19.653	285.01	1.162	0.857	1.086	1.162	1.162	0.399	1.162	1.162
285.21	-64.453	-54.077	-66.65	-54.688	-66.528	-65.918	-66.284	-18.433	285.21	1.162	1.086	1.086	1.162	1.162	0.399	1.162	1.238
285.41	-64.453	-54.077	-66.528	-54.688	-66.528	-66.04	-66.284	-17.09	285.41	1.086	1.01	0.857	1.162	1.086	0.781	1.238	1.467
285.61	-64.453	-54.199	-66.528	-54.688	-66.528	-65.918	-66.284	-15.991	285.61	0.781	0.475	0.704	1.162	0.857	1.086	1.467	1.62
285.81	-64.453	-54.199	-66.528	-54.688	-66.528	-65.918	-66.284	-15.015	285.81	0.399	-0.059	0.857	1.162	0.704	1.162	1.62	1.467
286.01	-64.453	-54.199	-66.528	-54.688	-66.528	-65.918	-66.284	-14.038	286.01	0.399	0.094	0.933	1.162	0.857	1.162	1.467	1.238
286.21	-64.453	-54.321	-66.528	-54.81	-66.528	-65.918	-66.284	-13.184	286.21	0.781	0.704	0.475	1.086	1.086	1.162	1.315	1.162
286.41	-64.453	-54.443	-66.528	-54.932	-66.65	-65.918	-66.284	-12.329	286.41	1.01	1.01	-0.059	0.857	1.162	1.086	1.467	1.086
286.61	-64.331	-54.443	-66.528	-55.054	-66.528	-65.918	-66.284	-11.597	286.61	0.781	0.781	0.17	0.628	1.162	0.857	1.544	0.857
286.81	-64.331	-54.565	-66.528	-55.054	-66.528	-65.918	-66.284	-10.986	286.81	0.399	0.399	1.01	0.552	1.162	0.704	1.162	0.781
287.01	-64.453	-54.443	-66.528	-55.176	-66.65	-65.918	-66.284	-10.498	287.01	0.399	0.399	1.544	0.552	1.162	0.933	0.781	1.162
287.21	-64.331	-54.565	-66.528	-55.176	-66.65	-65.918	-66.284	-10.01	287.21	0.781	0.704	1.467	0.475	1.162	1.391	0.857	1.544
287.41	-64.453	-54.688	-66.528	-55.176	-66.65	-65.918	-66.284	-9.521	287.41	1.01	0.704	1.162	0.17	1.162	1.62	1.162	1.467
287.61	-64.331	-54.81	-66.528	-55.298	-66.65	-65.918	-66.284	-9.155	287.61	0.857	0.399	0.857	-0.211	1.162	1.467	1.391	1.238
287.81	-64.331	-54.81	-66.65	-55.298	-66.65	-65.918	-66.284	-8.911	287.81	0.704	0.399	0.704	-0.135	1.162	1.315	1.315	1.238
288.01	-64.331	-54.932	-66.65	-55.42	-66.65	-65.918	-66.284	-8.545	288.01	0.857	0.781	0.781	0.475	1.162	1.544	1.01	1.391
288.21	-64.453	-54.932	-66.528	-55.42	-66.528	-65.796	-66.284	-8.301	288.21	1.086	1.01	0.781	0.933	1.162	1.925	1.01	1.238
288.41	-64.331	-55.054	-66.528	-55.42	-66.65	-65.918	-66.284	-8.057	288.41	1.162	0.857	0.704	0.857	1.162	1.925	1.391	0.704
288.61	-64.331	-55.054	-66.65	-55.42	-66.65	-65.918	-66.284	-7.812	288.61	1.238	0.781	0.857	0.628	1.162	1.544	1.62	0.475
288.811	-64.331	-55.054	-66.65	-55.542	-66.65	-65.918	-66.284	-7.568	288.811	1.391	1.086	1.086	0.475	1.086	1.238	1.467	0.781
289.011	-64.331	-55.176	-66.65	-55.664	-66.65	-65.918	-66.284	-7.324	289.011	1.315	1.162	1.086	0.247	0.857	1.238	1.238	1.086
289.211	-64.331	-55.176	-66.528	-55.664	-66.65	-65.918	-66.284	-7.202	289.211	1.01	0.704	0.857	0.018	0.628	1.391	1.238	1.086
289.411	-64.453	-55.176	-66.528	-55.786	-66.65	-65.918	-66.284	-6.958	289.411	0.933	0.475	0.704	0.018	0.475	1.238	1.391	0.857
289.611	-64.331	-55.298	-66.528	-55.786	-66.65	-65.918	-66.284	-6.714	289.611	1.01	0.781	0.781	0.323	0.323	0.704	1.315	0.628
289.811	-64.453	-55.298	-66.528	-55.786	-66.65	-65.918	-66.284	-6.592	289.811	0.857	1.01	0.704	0.781	0.323	0.475	1.01	0.552
290.011	-64.331	-55.42	-66.528	-55.786	-66.65	-65.918	-66.284	-6.47	290.011	0.704	0.857	0.323	1.01	0.399	0.704	0.933	0.552
290.211	-64.331	-55.542	-66.528	-55.908	-66.65	-65.918	-66.284	-6.226	290.211	0.933	0.704	0.094	0.857	0.323	0.781	1.086	0.475
290.411	-64.331	-55.42	-66.528	-56.03	-66.65	-65.918	-66.284	-6.104	290.411	1.391	0.857	0.323	0.628	0.399	0.704	1.162	0.323
290.611	-64.331	-55.542	-66.528	-56.03	-66.65	-65.918	-66.284	-5.859	290.611	1.62	1.086	0.704	0.475	0.781	0.857	1.162	0.323
290.811	-64.331	-55.542	-66.528	-56.03	-66.65	-66.04	-66.284	-5.737	290.811	1.467	1.162	0.781	0.323	1.162	1.086	1.238	0.475
291.011	-64.331	-55.664	-66.528	-56.152	-66.65	-66.04	-66.284	-5.615	291.011	1.238	1.162	0.628	0.399	1.467	1.162	1.467	0.552
291.211	-64.331	-55.664	-66.65	-56.152	-66.65	-65.918	-66.406	-5.371	291.211	1.162	1.162	0.552	0.781	1.62	1.086	1.544	0.552
291.411	-64.331	-55.786	-66.65	-56.274	-66.65	-66.04	-66.284	-5.249	291.411	1.162	1.162	0.628	1.086	1.391	0.857	1.162	0.552
291.611	-64.331	-55.786	-66.528	-56.274	-66.65	-65.918	-66.284	-5.127	291.611	1.162	1.162	0.857	1.162	0.933	0.704	0.781	0.552
291.811	-64.331	-55.786	-66.528	-56.274	-66.65	-66.04	-66.284	-5.127	291.811	1.162	1.162	1.162	1.162	0.628	0.857	0.857	0.552
292.011	-64.331	-55.786	-66.528	-56.396	-66.65	-66.04	-66.284	-5.005	292.011	1.162	1.162	1.467	1.162	0.552	1.01	1.086	0.552
292.211	-64.331	-55.908	-66.65	-56.396	-66.528	-66.04	-66.284	-4.883	292.211	1.162	1.238	1.62	1.162	0.552	0.781	1.162	0.628
292.411	-64.331	-55.908	-66.528	-56.396	-66.65	-66.04	-66.284	-4.761	292.411	1.162	1.467	1.467	1.086	0.475	0.399	1.162	0.781
292.611	-64.331	-56.03	-66.528	-56.519	-66.65	-66.04	-66.406	-4.639	292.611	1.162	1.62	1.238	0.781	0.323	0.323	1.162	0.704
292.811	-64.209	-56.152	-66.528	-56.519	-66.528	-66.04	-66.284	-4.517	292.811	1.162	1.467	1.238	0.323	0.399	0.399	1.086	0.323
293.011	-64.209	-56.152	-66.528	-56.641	-66.65	-66.04	-66.284	-4.395	293.011	1.238	1.238	1.467	0.094	0.781	0.323	0.781	0.094
293.211	-64.331	-56.152	-66.528	-56.641	-66.65	-66.04	-66.284	-4.272	293.211	1.467	1.162	1.62	0.323	1.01	0.323	0.323	0.323
293.411	-64.331	-56.274	-66.65	-56.641	-66.65	-65.918	-66.284	-4.272	293.411	1.62	1.162	1.467	0.704	0.857	0.475	0.018	0.781
293.611	-64.331	-56.274	-66.65	-56.763	-66.65	-66.04	-66.284	-4.15	293.611	1.544	1.162	1.238	0.781	0.704	0.552	0.018	1.01
293.811	-64.331	-56.274	-66.528	-56.763	-66.65	-66.04	-66.284	-4.028	293.811	1.544	1.162	1.162	0.704	0.857	0.475	0.323	0.781
294.011	-64.331	-56.396	-66.65	-56.885	-66.65	-66.04	-66.284	-3.906	294.011	1.62	1.162	1.238	0.781	1.01	0.323	0.704	0.399
294.211	-64.331	-56.519	-66.65	-56.885	-66.65	-65.918	-66.406	-3.784	294.211	1.467	1.162	1.544	0.781	0.781	0.399	0.704	0.399
294.411	-64.331	-56.519	-66.528	-56.885	-66.65	-65.918	-66.284	-3.784	294.411	1.238	1.162	1.925	0.704	0.399	0.781	0.399	0.704
294.611	-64.331	-56.641	-66.528	-56.885	-66.65	-66.04	-66.284	-3.784	294.611	1.162	1.162	1.925	0.857	0.399	1.086	0.399	0.704
294.811	-64.331	-56.763	-66.528	-57.007	-66.65	-65.918	-66.284	-3.662	294.811	1.162	1.238	1.62	1.086	0.781	1.086	0.781	0.399
295.011	-64.331	-56.763	-66.528	-57.007	-66.65	-65.918	-66.284	-3.662	295.011	1.086	1.467	1.544	1.086	1.01	0.933	1.086	0.323
295.211	-64.331	-56.763	-66.528	-57.129	-66.772	-66.04	-66.284	-3.54	295.211	0.857	1.62	1.62	0.857	0.781	0.933	1.162	0.399
295.411	-64.331	-56.763	-66.65	-57.129	-66.65	-65.918	-66.284	-3.54	295.411	0.704	1.467	1.467	0.704	0.399	0.933	1.086	0.247
295.611	-64.331	-56.885	-66.528	-57.251	-66.65	-65.918	-66.284	-3.54	295.611	0.857	1.315	1.315	0.933	0.399	0.552	0.781	0.018
295.811	-64.331	-56.885	-66.528	-57.251	-66.65	-65.918	-66.406	-3.418	295.811	1.01	1.467	1.467	1.391	0.704	0.17	0.399	-0.059
296.011	-64.331	-56.885	-66.528	-57.251	-66.65	-65.918	-66.284	-3.418	296.011	0.857	1.544	1.62	1.62	0.781	0.247	0.475	0.018
296.211	-64.331	-57.007	-66.528	-57.373	-66.65	-65.918	-66.284	-3.418	296.211	0.704	1.162	1.467	1.467	0.628	0.475	1.086	0.247
296.411	-64.209	-57.007	-66.528	-57.373	-66.65	-65.918	-66.406	-3.418	296.411	0.857	0.857	1.238	1.238	0.552	0.552	1.544	0.475
296.611	-64.209	-57.007	-66.528	-57.373	-66.65	-66.04	-66.284	-3.418	296.611	1.162	1.162	1.162	1.238	0.552	0.628	1.467	0.552
296.811	-64.209	-57.129	-66.528	-57.495	-66.65	-66.04	-66.406	-3.418	296.811	1.467	1.544	1.162	1.391	0.552	0.933	1.238	0.475
297.011	-64.331	-57.129	-66.65	-57.617	-66.65	-66.04	-66.284	-3.418	297.011	1.62	1.391	1.162	1.315	0.628	1.238	1.162	0.247
297.211	-64.209	-57.251	-66.528	-57.617	-66.65	-66.04	-66.406	-3.54	297.211	1.467	1.01	1.238	1.086	0.933	1.01	1.086	0.018
297.411	-64.209	-57.251	-66.65	-57.617	-66.65	-66.04	-66.284	-3.54	297.411	1.238	0.933	1.544	1.315	1.391	0.475	0.781	-0.059
297.611	-64.209	-57.251	-66.65	-57.739	-66.65	-66.04	-66.406	-3.54	297.611	1.086	1.01	1.925	1.849	1.62	0.323	0.399	0.018
297.811	-64.209	-57.251	-66.65	-57.739	-66.65	-66.04	-66.406	-3.54	297.811	0.781	0.933	1.925	2.001	1.467	0.399	0.399	0.323
298.011	-64.209	-57.373	-66.65	-57.861	-66.65	-66.04	-66.406	-3.54	298.011	0.323	0.933	1.62	1.849	1.238	0.247	0.781	0.704
298.211	-64.331	-57.373	-66.65	-57.861	-66.65	-66.04	-66.284	-3.662	298.211	0.094	1.162	1.544	1.696	1.162	0.018	1.086	0.781
298.411	-64.331	-57.373	-66.65	-57.861	-66.65	-66.04	-66.406	-3.662	298.411	0.323	1.391	1.62	1.467	1.086	0.018	1.162	0.704
298.611	-64.331	-57.495	-66.65	-57.983	-66.65	-66.162	-66.406	-3.662	298.611	0.704	1.315	1.391	1.238	0.857	0.247	1.162	0.781
298.811	-64.331	-57.495	-66.65	-57.983	-66.65	-66.04	-66.406	-3.662	298.811	0.781	1.01	0.933	1.238	0.704	0.475	1.162	0.704
299.011	-64.209	-57.617	-66.65	-57.983	-66.772	-66.04	-66.406	-3.784	299.011	0.704	0.933	0.781	1.467	0.857	0.552	1.162	0.323
299.211	-64.331	-57.617	-66.65	-58.105	-66.65	-66.04	-66.284	-3.784	299.211	0.857	1.086	1.162	1.544	1.01	0.552	1.162	0.094
299.411	-64.331	-57.739	-66.65	-58.105	-66.772	-66.04	-66.406	-3.784	299.411	1.01	1.162	1.467	1.238	0.781	0.704	1.162	0.323
299.611	-64.331	-57.739	-66.65	-58.105	-66.65	-66.04	-66.284	-3.906	299.611	0.781	1.162	1.086	1.01	0.399	1.162	1.162	0.781
299.811	-64.331	-57.739	-66.65	-58.228	-66.65	-66.04	-66.284	-3.906	299.811	0.323	1.162	0.552	1.01	0.399	1.544	1.162	1.086
300.011	-64.331	-57.861	-66.65	-58.228	-66.65	-65.918	-66.162	-4.028	300.011	0.094	1.162	0.781	0.933	0.781	1.391	1.086	1.162
300.211	-64.331	-57.861	-66.65	-58.35	-66.65	-66.04	-66.284	-4.15	300.211	0.323	1.086	1.544	0.933	1.162	0.933	0.857	1.162
300.411	-64.331	-57.983	-66.65	-58.35	-66.65	-66.04	-66.162	-4.15	300.411	0.704	0.781	1.849	1.086	1.467	0.704	0.704	1.086
300.611	-64.331	-57.983	-66.65	-58.35	-66.65	-66.04	-66.162	-4.15	300.611	0.628	0.399	1.62	1.162	1.696	0.857	0.857	0.781
300.811	-64.331	-58.105	-66.65	-58.35	-66.772	-66.04	-66.284	-4.272	300.811	0.018	0.323	1.544	1.162	1.772	1.01	1.086	0.323
301.011	-64.331	-58.105	-66.65	-58.472	-66.65	-65.918	-66.162	-4.272	301.011	-0.364	0.475	1.62	1.162	1.696	0.933	1.086	0.094
301.211	-64.331	-58.105	-66.65	-58.472	-66.65	-66.04	-66.162	-4.395	301.211	0.018	0.552	1.467	1.086	1.467	1.01	0.857	0.323
301.411	-64.209	-58.228	-66.65	-58.594	-66.65	-66.04	-66.162	-4.517	301.411	0.704	0.475	1.238	0.933	1.238	1.315	0.704	0.704
301.611	-64.331	-58.228	-66.65	-58.594	-66.65	-66.04	-66.162	-4.639	301.611	1.086	0.323	1.162	1.01	1.238	1.467	0.857	0.781
301.811	-64.331	-58.228	-66.65	-58.716	-66.65	-66.04	-66.162	-4.639	301.811	1.162	0.323	1.162	1.315	1.467	1.544	1.086	0.628
302.011	-64.209	-58.35	-66.65	-58.716	-66.772	-66.04	-66.162	-4.761	302.011	1.086	0.399	1.162	1.391	1.62	1.62	1.162	0.552
302.211	-64.331	-58.35	-66.65	-58.716	-66.65	-65.918	-66.284	-4.883	302.211	0.857	0.323	1.162	1.238	1.467	1.467	1.162	0.552
302.411	-64.209	-58.35	-66.65	-58.838	-66.772	-65.918	-66.284	-4.883	302.411	0.628	0.323	1.162	1.162	1.238	1.238	1.238	0.552
302.611	-64.209	-58.472	-66.65	-58.838	-66.65	-66.04	-66.162	-5.005	302.611	0.552	0.475	1.162	1.162	1.162	1.162	1.467	0.628
302.811	-64.209	-58.472	-66.65	-58.838	-66.65	-65.918	-66.284	-5.127	302.811	0.628	0.628	1.086	1.162	1.162	1.238	1.62	0.933
303.011	-64.209	-58.472	-66.65	-58.96	-66.65	-66.04	-66.162	-5.249	303.011	0.857	0.781	0.781	1.162	1.162	1.544	1.391	1.391
303.211	-64.209	-58.472	-66.65	-58.96	-66.65	-66.04	-66.284	-5.493	303.211	1.01	0.781	0.399	1.162	1.238	1.925	0.933	1.544
303.411	-64.331	-58.594	-66.65	-59.082	-66.65	-66.04	-66.162	-5.493	303.411	0.857	0.704	0.323	1.238	1.467	1.849	0.704	1.162
303.611	-64.209	-58.594	-66.65	-59.082	-66.65	-66.04	-66.284	-5.615	303.611	0.704	0.781	0.399	1.467	1.62	1.238	0.857	0.781
303.811	-64.209	-58.716	-66.65	-59.082	-66.65	-66.04	-66.162	-5.737	303.811	0.781	0.781	0.323	1.62	1.467	0.781	1.086	0.857
304.011	-64.209	-58.716	-66.65	-59.204	-66.65	-66.04	-66.162	-5.859	304.011	0.704	0.628	0.323	1.544	1.162	0.857	1.238	1.086
304.211	-64.209	-58.716	-66.65	-59.204	-66.772	-66.04	-66.162	-5.981	304.211	0.323	0.552	0.399	1.544	0.933	1.086	1.467	1.086
304.411	-64.209	-58.716	-66.65	-59.204	-66.65	-66.04	-66.162	-6.226	304.411	0.094	0.628	0.323	1.62	1.086	1.238	1.696	0.857
304.611	-64.209	-58.838	-66.772	-59.326	-66.65	-66.162	-66.162	-6.226	304.611	0.323	0.781	0.399	1.391	1.62	1.467	1.772	0.704
304.811	-64.331	-58.838	-66.65	-59.326	-66.65	-66.162	-66.162	-6.348	304.811	0.704	0.781	0.781	0.933	1.772	1.62	1.696	0.857
305.011	-64.209	-58.838	-66.65	-59.326	-66.65	-66.162	-66.162	-6.592	305.011	0.704	0.704	1.086	0.781	1.238	1.467	1.467	1.086
305.211	-64.331	-58.96	-66.65	-59.326	-66.65	-66.162	-66.162	-6.714	305.211	0.323	0.857	1.162	1.162	0.781	1.238	1.238	1.162
305.411	-64.331	-58.96	-66.65	-59.448	-66.65	-66.04	-66.284	-6.836	305.411	0.094	1.01	1.162	1.544	0.857	1.162	1.162	1.162
305.611	-64.209	-59.082	-66.65	-59.448	-66.65	-66.04	-66.284	-6.958	305.611	0.323	0.857	1.162	1.391	1.086	1.238	1.238	1.238
305.811	-64.209	-59.082	-66.65	-59.448	-66.65	-66.04	-66.162	-6.958	305.811	0.704	0.628	1.086	0.857	1.162	1.467	1.467	1.467
306.011	-64.209	-59.082	-66.772	-59.57	-66.65	-66.162	-66.162	-7.08	306.011	0.704	0.552	0.781	0.475	1.162	1.62	1.62	1.62
306.211	-64.209	-59.082	-66.772	-59.57	-66.65	-66.04	-66.162	-7.202	306.211	0.399	0.628	0.399	0.628	1.162	1.544	1.467	1.467
306.411	-64.331	-59.204	-66.772	-59.57	-66.65	-66.04	-66.162	-7.324	306.411	0.399	0.857	0.399	0.933	1.086	1.62	1.315	1.238
306.611	-64.209	-59.204	-66.65	-59.57	-66.65	-66.04	-66.162	-7.568	306.611	0.781	1.086	0.704	0.857	0.857	1.925	1.467	1.162
306.811	-64.209	-59.204	-66.65	-59.57	-66.65	-66.04	-66.162	-7.568	306.811	1.01	1.086	0.781	0.628	0.704	1.925	1.62	1.162
307.011	-64.209	-59.326	-66.772	-59.692	-66.65	-66.04	-66.162	-7.69	307.011	0.857	0.857	0.704	0.552	0.857	1.544	1.467	1.162
307.211	-64.209	-59.326	-66.65	-59.692	-66.65	-66.04	-66.162	-7.935	307.211	0.704	0.704	0.781	0.475	1.01	1.315	1.315	1.162
307.411	-64.209	-59.448	-66.65	-59.814	-66.772	-66.04	-66.162	-8.057	307.411	0.857	0.857	0.704	0.247	0.857	1.467	1.467	1.086
307.611	-64.209	-59.448	-66.65	-59.814	-66.65	-66.04	-66.04	-8.179	307.611	1.01	1.086	0.399	0.094	0.628	1.62	1.62	0.781
307.811	-64.209	-59.448	-66.65	-59.937	-66.65	-66.04	-66.162	-8.301	307.811	0.857	1.162	0.399	0.247	0.552	1.467	1.467	0.399
308.011	-64.209	-59.448	-66.65	-59.937	-66.65	-66.04	-66.04	-8.423	308.011	0.704	1.162	0.704	0.399	0.552	1.238	1.238	0.399
308.211	-64.209	-59.57	-66.65	-59.937	-66.65	-66.04	-66.04	-8.545	308.211	0.857	1.162	0.781	0.247	0.552	1.162	1.162	0.704
308.411	-64.209	-59.57	-66.65	-60.303	-66.65	-65.918	-66.162	-8.789	308.411	1.086	1.086	0.704	0.018	0.552	1.086	1.162	0.781
308.611	-64.209	-59.57	-66.65	-60.059	-66.65	-65.918	-66.162	-8.911	308.611	1.162	0.857	0.857	0.094	0.552	0.857	1.086	0.704
308.811	-64.209	-59.692	-66.65	-60.059	-66.772	-65.918	-66.04	-9.155	308.811	1.238	0.704	1.086	0.628	0.552	0.704	0.857	0.857
309.011	-64.209	-59.692	-66.65	-60.181	-66.65	-66.04	-66.162	-9.277	309.011	1.467	0.857	1.086	1.162	0.475	0.857	0.781	1.162
309.211	-64.209	-59.692	-66.65	-60.181	-66.772	-66.04	-66.162	-9.399	309.211	1.544	1.086	0.781	1.086	0.247	1.162	1.162	1.391
309.411	-64.087	-59.692	-66.65	-60.181	-66.65	-66.04	-66.162	-9.521	309.411	1.162	1.162	0.399	0.781	0.094	1.391	1.544	1.238
309.611	-64.209	-59.814	-66.772	-60.303	-66.65	-66.04	-66.162	-9.644	309.611	0.781	1.162	0.399	0.781	0.323	1.238	1.391	0.704
309.811	-64.209	-59.814	-66.65	-60.303	-66.65	-66.04	-66.162	-9.766	309.811	0.781	1.162	0.704	0.704	0.781	0.704	0.933	0.475
310.011	-64.209	-59.814	-66.65	-60.303	-66.65	-66.04	-66.162	-9.888	310.011	0.781	1.086	0.781	0.399	1.086	0.475	0.704	0.781
310.211	-64.087	-59.814	-66.65	-60.425	-66.65	-66.04	-66.162	-10.01	310.211	0.704	0.781	0.704	0.399	1.162	0.781	0.857	1.086
310.411	-64.209	-59.937	-66.65	-60.425	-66.65	-66.04	-66.162	-10.254	310.411	0.857	0.399	0.857	0.781	1.162	1.086	1.086	1.162
310.611	-64.209	-59.937	-66.65	-60.425	-66.65	-66.04	-66.162	-10.376	310.611	1.086	0.399	1.01	1.01	1.086	1.162	1.162	1.162
310.811	-64.209	-59.937	-66.65	-60.425	-66.65	-66.04	-66.162	-10.498	310.811	1.238	0.781	0.781	0.781	0.781	1.238	1.162	1.162
311.011	-64.209	-59.937	-66.65	-60.547	-66.65	-66.162	-66.162	-10.742	311.011	1.544	1.086	0.399	0.399	0.323	1.391	1.162	1.086
311.211	-64.209	-60.059	-66.65	-60.547	-66.65	-66.04	-66.04	-10.864	311.211	1.925	1.162	0.399	0.399	0.094	1.315	1.162	0.857
311.411	-64.209	-60.059	-66.65	-60.547	-66.65	-66.04	-66.162	-10.986	311.411	2.001	1.162	0.781	0.781	0.323	1.01	1.162	0.704
311.611	-64.209	-60.181	-66.65	-60.547	-66.65	-66.04	-66.162	-11.23	311.611	1.849	1.086	1.086	1.01	0.704	0.857	1.162	0.857
311.811	-64.209	-60.181	-66.65	-60.547	-66.65	-66.04	-66.162	-11.353	311.811	1.696	0.857	1.162	0.857	0.781	0.781	1.162	1.01
312.011	-64.209	-60.181	-66.65	-60.669	-66.65	-66.162	-66.04	-11.353	312.011	1.467	0.781	1.162	0.704	0.704	0.628	1.086	0.781
312.211	-64.209	-60.181	-66.65	-60.669	-66.65	-66.04	-66.04	-11.475	312.211	1.238	1.238	1.086	0.857	0.857	0.552	0.857	0.399
312.411	-64.209	-60.303	-66.65	-60.669	-66.65	-66.04	-66.04	-11.719	312.411	1.162	1.849	0.857	1.01	1.01	0.628	0.704	0.399
312.611	-64.209	-60.303	-66.65	-60.669	-66.65	-66.162	-66.04	-11.841	312.611	1.162	1.925	0.704	0.857	0.857	0.781	0.857	0.704
312.811	-64.209	-60.303	-66.528	-60.791	-66.65	-66.162	-66.04	-11.963	312.811	1.162	1.544	0.857	0.628	0.704	0.704	1.086	0.704
313.011	-64.209	-60.303	-66.65	-60.791	-66.65	-66.04	-66.04	-12.207	313.011	1.162	1.238	1.086	0.552	0.857	0.399	1.086	0.399
313.211	-64.209	-60.425	-66.65	-60.791	-66.65	-66.04	-66.04	-12.329	313.211	1.162	1.162	1.162	0.552	1.086	0.399	0.857	0.399
313.411	-64.209	-60.425	-66.65	-60.791	-66.65	-66.04	-66.04	-12.451	313.411	1.162	1.162	1.162	0.475	1.086	0.781	0.704	0.704
313.611	-64.209	-60.425	-66.65	-60.791	-66.65	-66.04	-66.162	-12.573	313.611	1.162	1.162	1.162	0.247	0.857	1.01	0.857	0.781
313.811	-64.209	-60.547	-66.65	-60.791	-66.65	-66.162	-66.04	-12.817	313.811	1.162	1.162	1.162	0.094	0.704	0.781	1.086	0.704
314.011	-64.209	-60.547	-66.65	-60.913	-66.772	-66.162	-66.04	-12.939	314.011	1.162	1.162	1.238	0.323	0.857	0.399	1.162	0.857
314.211	-64.209	-60.669	-66.65	-60.913	-66.772	-66.04	-66.04	-13.062	314.211	1.162	1.162	1.467	0.781	1.01	0.399	1.162	1.01
314.411	-64.209	-60.669	-66.65	-61.035	-66.772	-66.04	-66.04	-13.184	314.411	1.162	1.162	1.62	1.086	0.781	0.704	1.162	0.781
314.611	-64.209	-60.669	-66.65	-61.035	-66.65	-66.04	-66.04	-13.428	314.611	1.162	1.162	1.467	1.162	0.399	0.704	1.162	0.323
314.811	-64.209	-60.669	-66.65	-61.035	-66.65	-66.04	-66.162	-13.55	314.811	1.238	1.238	1.238	1.162	0.399	0.323	1.086	0.094
315.011	-64.331	-60.669	-66.65	-61.157	-66.65	-66.04	-66.162	-13.672	315.011	1.467	1.391	1.238	1.162	0.781	0.094	0.857	0.323
315.211	-64.209	-60.791	-66.528	-61.157	-66.772	-66.04	-66.162	-13.794	315.211	1.62	1.315	1.467	1.162	1.086	0.247	0.704	0.704
315.411	-64.209	-60.791	-66.65	-61.157	-66.65	-66.04	-66.162	-13.916	315.411	1.467	1.01	1.62	1.162	1.162	0.399	0.857	0.704
315.611	-64.209	-60.791	-66.65	-61.157	-66.65	-66.04	-66.162	-14.038	315.611	1.238	0.933	1.544	1.162	1.086	0.247	1.01	0.323
315.811	-64.209	-60.913	-66.65	-61.157	-66.65	-66.04	-66.162	-14.16	315.811	1.162	1.086	1.544	1.162	0.857	0.094	0.857	0.094
316.011	-64.209	-60.791	-66.65	-61.157	-66.65	-66.04	-66.162	-14.404	316.011	1.238	1.162	1.696	1.086	0.704	0.323	0.704	0.247
316.211	-64.209	-60.791	-66.65	-61.279	-66.772	-66.162	-66.04	-14.404	316.211	1.391	1.086	1.772	0.857	0.781	0.781	0.933	0.399
316.412	-64.209	-60.913	-66.65	-61.279	-66.772	-66.162	-66.162	-14.526	316.412	1.238	0.857	1.696	0.781	0.781	1.086	1.391	0.247
316.612	-64.209	-60.913	-66.65	-61.401	-66.772	-66.162	-66.162	-14.771	316.612	0.704	0.704	1.467	1.238	0.628	1.086	1.62	0.094
316.812	-64.209	-61.035	-66.65	-61.279	-66.772	-66.162	-66.162	-14.893	316.812	0.475	0.857	1.238	1.849	0.552	0.857	1.467	0.323
317.012	-64.209	-60.913	-66.65	-61.401	-66.772	-66.162	-66.162	-15.015	317.012	0.781	1.01	1.162	1.925	0.628	0.704	1.238	0.704
317.212	-64.209	-61.035	-66.65	-61.279	-66.65	-66.162	-66.04	-15.259	317.212	1.086	0.857	1.086	1.544	0.781	0.781	1.086	0.704
317.412	-64.209	-60.913	-66.65	-61.401	-66.65	-66.162	-66.162	-15.381	317.412	1.162	0.781	0.857	1.238	0.781	0.781	0.857	0.399
317.612	-64.209	-61.035	-66.65	-61.401	-66.65	-66.162	-66.162	-15.503	317.612	1.162	1.162	0.704	1.162	0.704	0.704	0.704	0.323
317.812	-64.209	-61.157	-66.65	-61.401	-66.65	-66.162	-66.162	-15.625	317.812	1.162	1.544	0.857	1.162	0.781	0.857	0.781	0.475
318.012	-64.209	-61.157	-66.65	-61.401	-66.65	-66.162	-66.162	-15.747	318.012	1.162	1.467	1.086	1.162	0.781	0.933	0.781	0.552
318.212	-64.209	-61.157	-66.65	-61.401	-66.65	-66.04	-66.162	-15.869	318.212	1.162	1.315	1.162	1.238	0.704	0.475	0.628	0.475
318.412	-64.209	-61.157	-66.65	-61.401	-66.65	-66.162	-66.04	-15.991	318.412	1.162	1.467	1.086	1.544	0.933	-0.135	0.552	0.247
318.612	-64.209	-61.279	-66.65	-61.401	-66.65	-66.162	-66.04	-16.113	318.612	1.086	1.62	0.857	1.925	1.391	-0.211	0.628	0.094
318.812	-64.209	-61.157	-66.65	-61.523	-66.65	-66.162	-66.04	-16.357	318.812	0.781	1.467	0.704	1.849	1.62	0.247	0.857	0.247
319.012	-64.209	-61.279	-66.65	-61.523	-66.65	-66.162	-66.04	-16.479	319.012	0.323	1.238	0.933	1.238	1.467	0.781	1.086	0.399
319.212	-64.331	-61.279	-66.65	-61.523	-66.65	-66.04	-66.04	-16.602	319.212	0.094	1.162	1.391	0.781	1.238	1.086	1.162	0.323
319.412	-64.209	-61.279	-66.65	-61.646	-66.65	-66.04	-66.162	-16.724	319.412	0.323	1.086	1.544	0.857	1.086	1.162	1.162	0.399
319.612	-64.209	-61.401	-66.65	-61.646	-66.772	-66.162	-66.04	-16.846	319.612	0.781	0.857	1.162	1.086	0.857	1.162	1.162	0.781
319.812	-64.209	-61.401	-66.65	-61.646	-66.65	-66.162	-66.04	-16.968	319.812	1.086	0.704	0.781	1.162	0.781	1.162	1.162	1.01
320.012	-64.209	-61.401	-66.65	-61.646	-66.65	-66.04	-66.162	-17.09	320.012	1.162	0.857	0.933	1.162	1.162	1.162	1.086	0.781
320.212	-64.209	-61.523	-66.772	-61.646	-66.65	-66.04	-66.162	-17.212	320.212	1.162	1.01	1.391	1.162	1.544	1.162	0.781	0.323
320.412	-64.209	-61.401	-66.65	-61.646	-66.65	-66.04	-66.04	-17.334	320.412	1.162	0.857	1.62	1.086	1.467	1.162	0.399	0.094
320.612	-64.087	-61.523	-66.65	-61.768	-66.65	-66.04	-66.04	-17.456	320.612	1.086	0.628	1.467	0.857	1.238	1.162	0.399	0.247
320.812	-64.209	-61.523	-66.65	-61.768	-66.772	-66.04	-66.162	-17.578	320.812	0.781	0.552	1.315	0.704	1.162	1.162	0.704	0.475
321.012	-64.087	-61.523	-66.65	-61.768	-66.772	-66.04	-66.04	-17.7	321.012	0.399	0.628	1.467	0.857	1.162	1.238	0.704	0.552
321.212	-64.209	-61.523	-66.65	-61.768	-66.65	-66.04	-66.162	-17.822	321.212	0.399	0.781	1.696	1.01	1.162	1.467	0.399	0.552
321.412	-64.087	-61.646	-66.65	-61.89	-66.772	-66.04	-66.162	-17.944	321.412	0.704	0.781	1.772	0.857	1.162	1.62	0.475	0.628
321.612	-64.087	-61.646	-66.65	-61.89	-66.772	-66.04	-66.04	-18.188	321.612	0.704	0.628	1.696	0.704	1.162	1.467	1.086	0.781
321.812	-64.087	-61.646	-66.65	-61.89	-66.65	-66.162	-66.162	-18.311	321.812	0.399	0.552	1.467	0.857	1.162	1.238	1.544	0.704
322.012	-64.209	-61.646	-66.65	-61.89	-66.65	-66.162	-66.04	-18.433	322.012	0.399	0.552	1.238	1.086	1.162	1.162	1.467	0.323
322.212	-64.209	-61.646	-66.65	-61.89	-66.65	-66.162	-66.162	-18.555	322.212	0.704	0.475	1.162	1.162	1.162	1.238	1.238	0.094
322.412	-64.209	-61.768	-66.772	-62.012	-66.772	-66.162	-66.04	-18.677	322.412	0.781	0.323	1.162	1.162	1.162	1.467	1.162	0.323
322.612	-64.087	-61.768	-66.772	-62.012	-66.772	-66.162	-66.162	-18.799	322.612	0.704	0.323	1.086	1.162	1.162	1.696	1.162	0.781
322.812	-64.087	-61.768	-66.772	-62.012	-66.772	-66.162	-66.162	-18.921	322.812	0.857	0.475	0.857	1.162	1.162	1.772	1.162	1.162
323.012	-64.087	-61.768	-66.772	-62.134	-66.65	-66.162	-66.162	-19.165	323.012	1.086	0.552	0.628	1.238	1.086	1.696	1.162	1.391
323.212	-64.209	-61.89	-66.772	-62.012	-66.772	-66.162	-66.162	-19.287	323.212	1.086	0.552	0.552	1.467	0.857	1.467	1.238	1.238
323.412	-64.087	-61.89	-66.65	-62.012	-66.772	-66.162	-66.04	-19.409	323.412	0.781	0.704	0.628	1.696	0.704	1.238	1.467	0.704
323.612	-64.087	-61.89	-66.65	-62.134	-66.65	-66.162	-66.04	-19.531	323.612	0.475	1.162	0.857	1.772	0.933	1.162	1.62	0.475
323.812	-64.087	-61.89	-66.65	-62.134	-66.65	-66.162	-66.162	-19.653	323.812	0.704	1.467	1.01	1.696	1.391	1.238	1.467	0.781
324.012	-64.087	-61.89	-66.65	-62.134	-66.65	-66.162	-66.162	-19.653	324.012	1.162	1.086	0.857	1.467	1.62	1.467	1.315	1.086
324.212	-64.087	-62.012	-66.772	-62.134	-66.772	-66.162	-66.162	-20.02	324.212	1.086	0.399	0.704	1.162	1.544	1.62	1.544	1.162
324.412	-64.087	-62.012	-66.772	-62.134	-66.65	-66.162	-66.162	-20.02	324.412	0.704	0.094	0.781	0.933	1.544	1.467	2.001	1.162
324.612	-64.087	-61.89	-66.65	-62.134	-66.65	-66.162	-66.162	-20.142	324.612	0.552	0.323	0.704	0.933	1.62	1.238	2.307	1.238
324.812	-64.209	-62.012	-66.65	-62.134	-66.65	-66.162	-66.162	-20.386	324.812	0.552	0.781	0.323	0.933	1.467	1.162	2.307	1.544
325.012	-64.087	-62.012	-66.65	-62.256	-66.65	-66.162	-66.162	-20.386	325.012	0.475	1.01	0.094	0.628	1.238	1.162	2.001	1.925
325.212	-64.209	-62.012	-66.65	-62.256	-66.772	-66.162	-66.162	-20.508	325.212	0.247	0.857	0.323	0.475	1.162	1.086	1.544	1.925
325.412	-64.209	-62.134	-66.528	-62.134	-66.772	-66.162	-66.162	-20.63	325.412	0.094	0.628	0.781	0.704	1.162	0.857	1.238	1.544
325.612	-64.209	-62.134	-66.65	-62.378	-66.772	-66.162	-66.04	-20.752	325.612	0.323	0.475	1.01	0.781	1.162	0.704	1.162	1.315
325.812	-64.209	-62.134	-66.528	-62.256	-66.772	-66.162	-66.04	-20.874	325.812	0.781	0.247	0.933	0.704	1.238	0.857	1.162	1.467
326.012	-64.209	-62.134	-66.528	-62.256	-66.772	-66.162	-66.04	-20.996	326.012	1.01	0.094	1.01	0.857	1.467	1.086	1.162	1.62
326.212	-64.209	-62.134	-66.528	-62.378	-66.772	-66.162	-66.162	-21.118	326.212	0.781	0.323	1.238	1.086	1.62	1.162	1.238	1.467
326.412	-64.209	-62.134	-66.65	-62.5	-66.772	-66.162	-66.04	-21.24	326.412	0.399	0.704	1.01	1.162	1.544	1.162	1.467	1.238
326.612	-64.087	-62.256	-66.528	-62.378	-66.772	-66.04	-66.162	-21.484	326.612	0.399	0.704	0.475	1.086	1.544	1.162	1.62	1.086
326.812	-64.087	-62.256	-66.65	-62.5	-66.772	-66.162	-66.04	-21.606	326.812	0.704	0.399	0.399	0.857	1.62	1.162	1.467	0.857
327.012	-64.087	-62.256	-66.65	-62.5	-66.772	-66.162	-66.04	-21.729	327.012	0.781	0.475	0.781	0.628	1.467	1.162	1.162	0.704
327.212	-64.209	-62.256	-66.528	-62.5	-66.772	-66.162	-66.162	-21.729	327.212	0.704	1.086	1.01	0.475	1.238	1.162	0.857	0.857
327.412	-64.087	-62.378	-66.528	-62.5	-66.772	-66.162	-66.162	-21.851	327.412	0.857	1.544	0.781	0.247	1.162	1.238	0.781	1.01
327.612	-64.087	-62.378	-66.65	-62.5	-66.772	-66.162	-66.162	-21.973	327.612	1.01	1.391	0.323	0.094	1.086	1.467	1.162	0.857
327.812	-64.087	-62.378	-66.65	-62.622	-66.772	-66.162	-66.162	-22.217	327.812	0.781	0.933	0.094	0.323	0.857	1.62	1.544	0.628
328.012	-64.087	-62.256	-66.65	-62.622	-66.772	-66.284	-66.162	-22.339	328.012	0.399	0.704	0.323	0.781	0.704	1.467	1.467	0.628
328.212	-64.087	-62.378	-66.65	-62.622	-66.772	-66.162	-66.162	-22.461	328.212	0.399	0.781	0.781	1.01	0.857	1.315	1.238	0.933
328.412	-64.087	-62.378	-66.528	-62.622	-66.772	-66.162	-66.162	-22.583	328.412	0.781	0.781	1.086	0.781	1.01	1.467	1.162	1.315
328.612	-64.087	-62.378	-66.65	-62.622	-66.772	-66.162	-66.04	-22.705	328.612	1.086	0.628	1.162	0.399	0.857	1.544	1.162	1.391
328.812	-63.965	-62.378	-66.65	-62.622	-66.772	-66.284	-66.04	-22.827	328.812	1.162	0.552	1.086	0.399	0.704	1.162	1.162	1.238
329.012	-64.087	-62.5	-66.65	-62.744	-66.772	-66.284	-66.162	-22.949	329.012	1.162	0.628	0.781	0.704	0.781	0.781	1.162	1.238
329.212	-64.087	-62.5	-66.65	-62.622	-66.65	-66.284	-66.162	-23.071	329.212	1.238	0.857	0.323	0.781	0.781	0.857	1.162	1.467
329.412	-64.087	-62.378	-66.65	-62.744	-66.772	-66.284	-66.04	-23.193	329.412	1.467	1.086	0.094	0.628	0.628	1.086	1.162	1.62
329.612	-64.087	-62.5	-66.65	-62.744	-66.772	-66.162	-66.162	-23.315	329.612	1.62	1.162	0.323	0.552	0.552	1.086	1.162	1.467
329.812	-64.087	-62.5	-66.65	-62.744	-66.772	-66.284	-66.04	-23.438	329.812	1.467	1.086	0.704	0.628	0.552	0.857	1.238	1.238
330.012	-64.087	-62.5	-66.65	-62.744	-66.772	-66.284	-66.162	-23.56	330.012	1.238	0.857	0.781	0.857	0.475	0.704	1.467	1.162
330.212	-64.087	-62.622	-66.65	-62.744	-66.772	-66.284	-66.04	-23.682	330.212	1.162	0.704	0.628	1.01	0.247	0.781	1.62	1.086
330.412	-64.087	-62.5	-66.65	-62.744	-66.772	-66.162	-66.04	-23.804	330.412	1.238	0.857	0.552	0.781	0.094	0.781	1.467	0.857
330.612	-64.087	-62.5	-66.65	-62.866	-66.772	-66.162	-66.04	-23.926	330.612	1.544	1.086	0.552	0.399	0.247	0.704	1.238	0.704
330.812	-64.087	-62.622	-66.528	-62.866	-66.772	-66.284	-66.162	-24.048	330.812	1.925	1.238	0.552	0.323	0.475	0.857	1.162	0.857
331.012	-64.087	-62.622	-66.65	-62.866	-66.772	-66.162	-66.04	-24.17	331.012	1.849	1.467	0.628	0.475	0.552	1.01	1.238	1.086
331.212	-64.087	-62.622	-66.65	-62.866	-66.772	-66.162	-66.162	-24.292	331.212	1.238	1.62	0.857	0.628	0.552	0.781	1.467	1.162
331.412	-64.087	-62.622	-66.528	-62.866	-66.772	-66.162	-66.162	-24.414	331.412	0.781	1.544	1.086	0.781	0.628	0.323	1.62	1.086
331.612	-64.087	-62.622	-66.528	-62.988	-66.772	-66.162	-66.162	-24.536	331.612	0.933	1.62	1.162	0.781	0.781	0.094	1.467	0.781
331.812	-64.087	-62.622	-66.528	-62.988	-66.772	-66.162	-66.162	-24.658	331.812	1.391	1.925	1.162	0.628	0.781	0.247	1.238	0.399
332.012	-64.087	-62.744	-66.528	-62.988	-66.772	-66.284	-66.162	-24.78	332.012	1.62	1.925	1.162	0.552	0.704	0.399	1.162	0.399
332.212	-64.087	-62.744	-66.528	-62.988	-66.772	-66.284	-66.162	-24.902	332.212	1.467	1.62	1.162	0.628	0.857	0.323	1.162	0.781
332.412	-64.087	-62.744	-66.528	-62.988	-66.772	-66.162	-66.162	-25.024	332.412	1.238	1.544	1.238	0.781	1.086	0.399	1.162	1.01
332.612	-64.087	-62.744	-66.528	-63.11	-66.772	-66.162	-66.162	-25.146	332.612	1.162	1.62	1.467	0.704	1.162	0.781	1.162	0.781
332.812	-64.087	-62.866	-66.528	-63.11	-66.772	-66.162	-66.162	-25.269	332.812	1.162	1.467	1.62	0.323	1.086	1.01	1.162	0.399
333.012	-64.087	-62.744	-66.528	-63.11	-66.772	-66.162	-66.162	-25.391	333.012	1.086	1.238	1.467	0.018	0.857	0.857	1.086	0.323
333.212	-64.087	-62.866	-66.528	-63.11	-66.65	-66.162	-66.162	-25.513	333.212	0.933	1.162	1.238	0.018	0.628	0.704	0.857	0.475
333.412	-64.087	-62.866	-66.528	-63.11	-66.772	-66.162	-66.162	-25.635	333.412	1.01	1.238	1.086	0.247	0.475	0.857	0.628	0.628
333.612	-64.087	-62.988	-66.65	-63.11	-66.772	-66.162	-66.162	-25.635	333.612	1.315	1.467	0.781	0.475	0.247	1.086	0.552	0.857
333.812	-64.087	-62.866	-66.528	-63.11	-66.772	-66.162	-66.162	-25.757	333.812	1.391	1.62	0.399	0.628	0.094	1.086	0.628	1.01
334.012	-64.087	-62.866	-66.65	-63.11	-66.772	-66.162	-66.162	-26.001	334.012	1.238	1.467	0.399	0.857	0.323	0.857	0.857	0.857
334.212	-64.087	-62.988	-66.528	-63.11	-66.65	-66.284	-66.162	-26.001	334.212	1.162	1.238	0.781	1.162	0.781	0.628	1.01	0.704
334.412	-64.087	-62.988	-66.528	-63.232	-66.772	-66.162	-66.162	-26.123	334.412	1.162	1.162	1.086	1.467	1.01	0.552	0.857	0.781
334.612	-64.087	-62.988	-66.65	-63.232	-66.772	-66.284	-66.162	-26.245	334.612	1.162	1.086	1.238	1.62	0.781	0.552	0.704	0.704
334.812	-64.087	-62.988	-66.65	-63.11	-66.65	-66.162	-66.162	-26.367	334.812	1.162	0.857	1.467	1.544	0.475	0.552	0.857	0.323
335.012	-64.087	-62.988	-66.528	-63.11	-66.772	-66.162	-66.04	-26.489	335.012	1.162	0.704	1.696	1.467	0.704	0.628	1.01	0.094
335.212	-64.087	-62.988	-66.65	-63.232	-66.65	-66.284	-66.162	-26.611	335.212	1.162	0.857	1.772	1.315	1.238	0.857	0.857	0.247
335.412	-64.087	-63.11	-66.65	-63.232	-66.65	-66.284	-66.162	-26.733	335.412	1.162	1.086	1.696	0.933	1.391	1.01	0.704	0.399
335.612	-64.087	-62.988	-66.528	-63.232	-66.65	-66.284	-66.04	-26.855	335.612	1.162	1.162	1.467	0.628	1.162	0.857	0.857	0.323
335.812	-64.209	-63.11	-66.65	-63.354	-66.772	-66.284	-66.04	-26.978	335.812	1.162	1.086	1.238	0.628	0.857	0.704	1.01	0.399
336.012	-64.087	-63.11	-66.65	-63.354	-66.65	-66.284	-66.04	-27.1	336.012	1.162	0.857	1.238	0.781	0.704	0.857	0.857	0.781
336.212	-64.087	-63.11	-66.65	-63.232	-66.65	-66.284	-66.04	-27.222	336.212	1.162	0.628	1.467	0.704	0.781	1.086	0.704	1.01
336.412	-64.087	-63.11	-66.528	-63.232	-66.65	-66.284	-66.04	-27.344	336.412	1.162	0.552	1.62	0.399	0.781	1.086	0.857	0.781
336.612	-64.209	-63.11	-66.65	-63.354	-66.65	-66.284	-66.04	-27.466	336.612	1.162	0.704	1.467	0.399	0.704	0.857	1.01	0.323
336.812	-64.209	-63.11	-66.528	-63.354	-66.772	-66.284	-66.04	-27.588	336.812	1.162	1.162	1.238	0.781	0.857	0.704	0.857	0.094
337.012	-64.209	-63.11	-66.528	-63.477	-66.772	-66.162	-66.162	-27.71	337.012	1.162	1.544	1.086	1.086	1.01	0.857	0.704	0.323
337.212	-64.087	-62.988	-66.528	-63.354	-66.65	-66.284	-66.162	-27.832	337.212	1.086	1.467	0.781	1.162	0.857	1.01	0.857	0.704
337.412	-64.209	-63.11	-66.65	-63.477	-66.772	-66.284	-66.04	-27.832	337.412	0.857	1.238	0.399	1.162	0.704	0.857	1.086	0.704
337.612	-64.087	-63.11	-66.528	-63.477	-66.772	-66.284	-66.04	-28.076	337.612	0.704	1.162	0.399	1.162	0.857	0.704	1.086	0.247
337.812	-64.087	-63.232	-66.65	-63.477	-66.65	-66.162	-66.04	-28.076	337.812	0.857	1.162	0.781	1.162	1.086	0.857	0.781	-0.211
338.012	-64.087	-63.232	-66.65	-63.477	-66.772	-66.162	-66.162	-28.198	338.012	1.086	1.162	1.086	1.162	1.162	1.01	0.399	-0.135
338.212	-64.209	-63.232	-66.65	-63.477	-66.772	-66.284	-66.162	-28.32	338.212	1.086	1.238	1.238	1.162	1.086	0.857	0.399	0.399
338.412	-64.087	-63.232	-66.65	-63.477	-66.772	-66.162	-66.162	-28.442	338.412	0.857	1.467	1.467	1.162	0.857	0.628	0.781	0.704
338.612	-64.087	-63.232	-66.65	-63.599	-66.65	-66.162	-66.162	-28.564	338.612	0.704	1.62	1.544	1.086	0.704	0.552	1.01	0.704
338.812	-64.087	-63.232	-66.65	-63.477	-66.65	-66.162	-66.162	-28.564	338.812	0.857	1.467	1.162	0.857	0.857	0.628	0.781	0.781
339.012	-64.087	-63.354	-66.528	-63.477	-66.772	-66.162	-66.162	-28.809	339.012	1.086	1.238	0.857	0.781	1.086	0.781	0.399	0.781
339.212	-64.087	-63.354	-66.65	-63.477	-66.772	-66.162	-66.162	-28.809	339.212	1.162	1.162	1.162	1.162	1.162	0.781	0.399	0.628
339.412	-64.087	-63.354	-66.65	-63.599	-66.772	-66.162	-66.162	-28.931	339.412	1.162	1.162	1.467	1.544	1.162	0.704	0.704	0.552
339.612	-64.087	-63.477	-66.65	-63.599	-66.772	-66.284	-66.162	-29.053	339.612	1.162	1.162	1.162	1.467	1.238	0.857	0.857	0.628
339.812	-64.087	-63.477	-66.65	-63.599	-66.65	-66.162	-66.162	-29.175	339.812	1.086	1.162	0.781	1.238	1.467	1.086	1.01	0.857
340.012	-64.087	-63.477	-66.65	-63.599	-66.65	-66.162	-66.162	-29.175	340.012	0.781	1.162	0.857	1.162	1.696	1.086	1.238	1.01
340.212	-64.087	-63.477	-66.65	-63.599	-66.772	-66.162	-66.162	-29.297	340.212	0.399	1.162	1.086	1.162	1.772	0.857	1.01	0.781
340.412	-64.087	-63.477	-66.65	-63.599	-66.772	-66.162	-66.162	-29.419	340.412	0.399	1.162	1.238	1.162	1.696	0.704	0.399	0.399
340.612	-64.087	-63.477	-66.65	-63.599	-66.65	-66.162	-66.162	-29.541	340.612	0.704	1.086	1.467	1.162	1.467	0.857	0.094	0.399
340.812	-64.087	-63.477	-66.65	-63.599	-66.772	-66.162	-66.162	-29.663	340.812	0.704	0.781	1.62	1.162	1.238	1.086	0.323	0.704
341.012	-64.087	-63.477	-66.65	-63.599	-66.772	-66.162	-66.162	-29.785	341.012	0.323	0.399	1.467	1.162	1.238	1.238	0.704	0.704
341.212	-63.965	-63.477	-66.65	-63.721	-66.65	-66.162	-66.162	-29.907	341.212	0.094	0.399	1.238	1.162	1.467	1.544	0.781	0.323
341.412	-63.965	-63.599	-66.65	-63.721	-66.65	-66.162	-66.04	-30.029	341.412	0.323	0.781	1.086	1.162	1.62	1.925	0.704	0.094
341.612	-64.087	-63.599	-66.65	-63.721	-66.65	-66.284	-66.04	-30.151	341.612	0.781	1.01	0.857	1.162	1.467	1.925	0.857	0.323
341.812	-64.087	-63.477	-66.65	-63.721	-66.65	-66.162	-66.04	-30.151	341.812	1.086	0.857	0.704	1.238	1.315	1.544	1.01	0.781
342.012	-64.087	-63.599	-66.65	-63.843	-66.65	-66.284	-66.04	-30.273	342.012	1.162	0.704	0.857	1.467	1.467	1.315	0.857	1.162
342.212	-64.087	-63.599	-66.772	-63.721	-66.65	-66.162	-66.04	-30.396	342.212	1.086	0.781	1.01	1.62	1.62	1.467	0.704	1.467
342.412	-64.087	-63.599	-66.65	-63.843	-66.65	-66.284	-66.04	-30.518	342.412	0.857	0.781	0.857	1.467	1.467	1.62	0.857	1.62
342.612	-64.087	-63.599	-66.65	-63.843	-66.772	-66.162	-66.04	-30.64	342.612	0.704	0.628	0.704	1.238	1.238	1.467	1.01	1.467
342.812	-64.087	-63.599	-66.65	-63.965	-66.772	-66.162	-66.04	-30.762	342.812	0.781	0.475	0.857	1.238	1.162	1.238	0.857	1.238
343.012	-63.965	-63.599	-66.65	-63.965	-66.772	-66.284	-66.04	-30.762	343.012	0.781	0.323	1.086	1.467	1.238	1.238	0.628	1.162
343.212	-63.965	-63.599	-66.65	-63.965	-66.772	-66.284	-66.04	-31.006	343.212	0.704	0.399	1.162	1.62	1.467	1.467	0.552	1.162
343.412	-63.965	-63.599	-66.65	-63.965	-66.65	-66.284	-66.162	-31.006	343.412	0.781	0.704	1.086	1.467	1.62	1.62	0.628	1.086
343.612	-63.965	-63.599	-66.65	-63.843	-66.772	-66.162	-66.04	-31.128	343.612	0.781	0.781	0.781	1.315	1.544	1.467	0.857	0.781
343.813	-63.965	-63.721	-66.65	-63.843	-66.772	-66.284	-66.04	-31.372	343.813	0.704	0.704	0.399	1.467	1.544	1.238	1.086	0.399
344.013	-63.965	-63.721	-66.65	-63.843	-66.772	-66.162	-66.04	-31.372	344.013	0.857	0.857	0.323	1.544	1.544	1.162	1.238	0.475
344.213	-64.087	-63.721	-66.65	-63.965	-66.772	-66.162	-66.04	-31.372	344.213	1.086	1.01	0.475	1.162	1.162	1.162	1.544	1.01
344.413	-63.965	-63.721	-66.65	-63.965	-66.772	-66.162	-66.04	-31.616	344.413	1.162	0.781	0.628	0.781	0.857	1.162	2.001	1.238
344.613	-63.965	-63.721	-66.65	-63.965	-66.772	-66.162	-66.04	-31.616	344.613	1.162	0.399	0.781	0.857	1.162	1.238	2.23	1.01
344.813	-63.965	-63.721	-66.65	-63.965	-66.772	-66.284	-66.04	-31.738	344.813	1.162	0.323	0.704	1.086	1.467	1.467	2.078	0.933
345.013	-63.965	-63.721	-66.65	-63.965	-66.65	-66.284	-66.04	-31.86	345.013	1.162	0.399	0.323	1.086	1.162	1.62	1.849	1.01
345.213	-64.087	-63.843	-66.65	-64.087	-66.772	-66.162	-66.04	-31.86	345.213	1.162	0.323	0.094	0.857	0.781	1.467	1.696	0.857
345.413	-63.965	-63.843	-66.65	-63.965	-66.65	-66.284	-66.04	-31.982	345.413	1.162	0.399	0.323	0.704	0.857	1.238	1.467	0.628
345.613	-64.087	-63.843	-66.65	-63.965	-66.772	-66.162	-66.04	-32.104	345.613	1.162	0.781	0.781	0.781	1.086	1.238	1.238	0.552
345.813	-63.965	-63.843	-66.65	-64.087	-66.772	-66.284	-66.04	-32.349	345.813	1.086	1.01	1.086	0.781	1.162	1.544	1.162	0.704
346.013	-63.965	-63.843	-66.772	-64.087	-66.65	-66.284	-66.04	-32.349	346.013	0.857	0.781	1.086	0.704	1.238	1.925	1.238	1.162
346.213	-63.965	-63.843	-66.65	-64.087	-66.65	-66.284	-66.04	-32.471	346.213	0.704	0.475	0.857	0.857	1.544	1.849	1.467	1.544
346.413	-63.965	-63.843	-66.65	-64.087	-66.65	-66.162	-66.04	-32.593	346.413	0.857	0.704	0.704	1.01	1.925	1.238	1.62	1.467
346.613	-63.965	-63.843	-66.65	-64.087	-66.65	-66.162	-66.04	-32.715	346.613	1.162	1.162	0.857	0.781	1.925	0.781	1.467	1.238
346.813	-63.965	-63.965	-66.528	-64.087	-66.65	-66.284	-66.04	-32.715	346.813	1.467	1.01	1.01	0.323	1.467	0.857	1.315	1.162
347.013	-63.965	-63.965	-66.65	-64.087	-66.772	-66.284	-66.04	-32.959	347.013	1.544	0.475	0.933	0.018	0.933	1.086	1.391	1.162
347.213	-63.965	-63.965	-66.65	-64.087	-66.772	-66.284	-66.162	-33.081	347.213	1.162	0.399	1.01	-0.059	0.781	1.162	1.315	1.162
347.413	-63.843	-63.965	-66.528	-64.087	-66.772	-66.284	-66.04	-33.203	347.413	0.857	0.704	1.238	0.018	1.162	1.162	1.01	1.162
347.613	-63.843	-63.843	-66.528	-64.087	-66.65	-66.284	-66.162	-33.203	347.613	1.238	0.781	1.086	0.323	1.544	1.086	0.933	1.162
347.813	-63.965	-63.843	-66.65	-64.209	-66.65	-66.284	-66.04	-33.447	347.813	1.849	0.628	0.781	0.781	1.467	0.857	1.086	1.162
348.013	-63.843	-63.965	-66.65	-64.209	-66.65	-66.284	-66.162	-33.447	348.013	1.849	0.475	0.781	1.01	1.238	0.704	1.238	1.162
348.213	-63.965	-63.965	-66.65	-64.087	-66.65	-66.284	-66.162	-33.569	348.213	1.238	0.323	0.781	0.857	1.086	0.857	1.467	1.162
348.413	-63.965	-63.965	-66.528	-64.209	-66.65	-66.284	-66.162	-33.569	348.413	0.857	0.323	0.704	0.628	0.857	1.086	1.62	1.086
348.613	-63.965	-63.965	-66.65	-64.209	-66.772	-66.284	-66.162	-33.691	348.613	1.162	0.475	0.781	0.475	0.704	1.162	1.467	0.781
348.813	-63.965	-63.965	-66.65	-64.209	-66.65	-66.284	-66.162	-33.813	348.813	1.544	0.552	0.857	0.247	0.857	1.162	1.238	0.399
349.013	-63.965	-63.965	-66.65	-64.331	-66.772	-66.406	-66.162	-33.936	349.013	1.467	0.552	1.01	0.094	1.086	1.162	1.162	0.399
349.213	-63.843	-63.965	-66.528	-64.209	-66.772	-66.406	-66.162	-34.058	349.213	1.238	0.628	1.238	0.247	1.162	1.238	1.162	0.781
349.413	-63.965	-63.965	-66.65	-64.209	-66.772	-66.284	-66.04	-34.18	349.413	1.086	0.781	1.086	0.475	1.086	1.467	1.162	1.086
349.613	-63.843	-64.087	-66.65	-64.331	-66.772	-66.284	-66.162	-34.424	349.613	0.857	0.781	0.781	0.628	0.857	1.62	1.162	1.086
349.813	-63.965	-64.087	-66.65	-64.331	-66.65	-66.284	-66.04	-34.424	349.813	0.704	0.704	0.857	0.857	0.704	1.467	1.162	0.857
350.013	-63.843	-63.965	-66.65	-64.331	-66.772	-66.284	-66.04	-34.424	350.013	0.933	0.857	1.01	1.01	0.781	1.238	1.162	0.704
350.213	-63.843	-64.087	-66.65	-64.331	-66.772	-66.284	-66.162	-34.668	350.213	1.391	1.01	0.857	0.781	0.704	1.162	1.162	0.857
350.413	-63.843	-64.087	-66.65	-64.331	-66.65	-66.284	-66.162	-34.79	350.413	1.696	0.857	0.704	0.323	0.399	1.162	1.162	1.086
350.613	-63.843	-64.087	-66.65	-64.331	-66.772	-66.284	-66.04	-34.79	350.613	1.772	0.704	0.781	0.018	0.399	1.162	1.162	1.162
350.813	-63.843	-64.087	-66.65	-64.331	-66.65	-66.284	-66.04	-34.912	350.813	1.696	0.857	0.704	-0.059	0.781	1.162	1.086	1.162
351.013	-63.843	-64.087	-66.65	-64.453	-66.772	-66.284	-66.162	-35.034	351.013	1.467	1.086	0.399	-0.059	1.086	1.162	0.857	1.162
351.213	-63.843	-64.087	-66.65	-64.331	-66.772	-66.284	-66.04	-35.156	351.213	1.238	1.162	0.399	0.018	1.086	1.086	0.704	1.086
351.413	-63.843	-64.087	-66.65	-64.453	-66.65	-66.284	-66.162	-35.278	351.413	1.162	1.162	0.781	0.247	0.781	0.781	0.781	0.857
351.613	-63.843	-64.209	-66.65	-64.331	-66.65	-66.284	-66.162	-35.4	351.613	1.162	1.162	1.086	0.399	0.399	0.399	0.781	0.781
351.813	-63.843	-64.209	-66.65	-64.331	-66.772	-66.284	-66.162	-35.4	351.813	1.162	1.162	1.162	0.247	0.323	0.399	0.704	1.162
352.013	-63.843	-64.209	-66.528	-64.453	-66.65	-66.284	-66.162	-35.522	352.013	1.162	1.086	1.162	0.094	0.475	0.704	0.857	1.544
352.213	-63.843	-64.209	-66.65	-64.331	-66.65	-66.284	-66.162	-35.645	352.213	1.162	0.857	1.162	0.323	0.552	0.704	1.086	1.391
352.413	-63.843	-64.209	-66.528	-64.453	-66.65	-66.284	-66.162	-35.645	352.413	1.162	0.704	1.086	0.781	0.552	0.399	1.162	0.933
352.613	-63.843	-64.209	-66.65	-64.453	-66.65	-66.284	-66.162	-35.767	352.613	1.162	0.857	0.857	1.01	0.552	0.399	1.086	0.704
352.813	-63.843	-64.331	-66.528	-64.453	-66.65	-66.284	-66.162	-35.889	352.813	1.162	1.01	0.704	0.857	0.475	0.781	0.857	0.857
353.013	-63.843	-64.209	-66.528	-64.453	-66.65	-66.284	-66.04	-36.011	353.013	1.086	0.857	0.933	0.704	0.323	1.01	0.704	1.01
353.213	-63.843	-64.209	-66.65	-64.453	-66.65	-66.406	-66.162	-36.133	353.213	0.857	0.781	1.391	0.781	0.399	0.857	0.781	0.933
353.413	-63.843	-64.331	-66.65	-64.453	-66.772	-66.284	-66.162	-36.255	353.413	0.704	1.162	1.696	0.704	0.781	0.704	0.781	1.01
353.613	-63.843	-64.331	-66.65	-64.575	-66.65	-66.284	-66.162	-36.377	353.613	0.933	1.467	1.772	0.399	1.01	0.781	0.704	1.315
353.813	-63.843	-64.209	-66.528	-64.453	-66.65	-66.284	-66.162	-36.377	353.813	1.391	1.162	1.772	0.323	0.781	0.704	0.857	1.391
354.013	-63.843	-64.331	-66.65	-64.453	-66.65	-66.406	-66.162	-36.499	354.013	1.62	0.781	1.772	0.475	0.323	0.399	1.086	1.162
354.213	-63.965	-64.331	-66.65	-64.453	-66.65	-66.406	-66.162	-36.621	354.213	1.544	0.857	1.62	0.628	0.094	0.323	1.162	0.781
354.413	-63.843	-64.331	-66.65	-64.453	-66.65	-66.406	-66.162	-36.743	354.413	1.544	1.086	1.086	0.781	0.323	0.475	1.086	0.399
354.613	-63.843	-64.209	-66.65	-64.453	-66.65	-66.406	-66.162	-36.743	354.613	1.62	1.162	0.552	0.781	0.781	0.628	0.857	0.399
354.813	-63.843	-64.331	-66.65	-64.575	-66.65	-66.406	-66.162	-36.865	354.813	1.391	1.162	0.704	0.628	1.086	0.781	0.628	0.704
355.013	-63.843	-64.331	-66.65	-64.575	-66.65	-66.406	-66.162	-37.109	355.013	0.933	1.238	1.238	0.552	1.162	0.781	0.552	0.704
355.213	-63.965	-64.331	-66.65	-64.575	-66.65	-66.284	-66.162	-37.231	355.213	0.704	1.467	1.391	0.628	1.162	0.704	0.552	0.323
355.413	-63.965	-64.331	-66.65	-64.575	-66.65	-66.406	-66.162	-37.231	355.413	0.857	1.62	1.238	0.781	1.162	0.857	0.552	0.018
355.613	-63.965	-64.331	-66.65	-64.575	-66.65	-66.406	-66.162	-37.354	355.613	1.086	1.467	1.238	0.781	1.086	1.01	0.628	-0.059
355.813	-63.965	-64.331	-66.772	-64.575	-66.65	-66.406	-66.162	-37.476	355.813	1.162	1.315	1.467	0.781	0.781	0.781	0.857	0.018
356.013	-63.843	-64.331	-66.65	-64.697	-66.772	-66.406	-66.162	-37.476	356.013	1.162	1.467	1.544	1.162	0.399	0.399	1.01	0.323
356.213	-63.965	-64.453	-66.65	-64.575	-66.65	-66.406	-66.04	-37.598	356.213	1.162	1.62	1.162	1.544	0.399	0.399	0.857	0.781
356.413	-63.965	-64.453	-66.65	-64.575	-66.65	-66.284	-66.162	-37.72	356.413	1.238	1.467	0.781	1.391	0.781	0.781	0.628	1.01
356.613	-63.843	-64.453	-66.65	-64.575	-66.65	-66.406	-66.162	-37.842	356.613	1.391	1.238	0.857	1.01	1.086	1.01	0.552	0.857
356.813	-63.843	-64.453	-66.65	-64.575	-66.65	-66.406	-66.162	-37.964	356.813	1.238	1.162	1.086	1.086	1.162	0.857	0.628	0.628
357.013	-63.965	-64.453	-66.65	-64.697	-66.65	-66.284	-66.162	-37.964	357.013	0.704	1.238	1.162	1.62	1.162	0.704	0.857	0.552
357.213	-63.965	-64.453	-66.65	-64.697	-66.528	-66.284	-66.162	-38.208	357.213	0.475	1.467	1.162	1.849	1.162	0.857	1.086	0.552
357.413	-63.965	-64.453	-66.65	-64.697	-66.65	-66.284	-66.162	-38.33	357.413	0.781	1.62	1.162	1.544	1.238	1.01	1.162	0.475
357.613	-63.965	-64.453	-66.65	-64.697	-66.65	-66.284	-66.162	-38.33	357.613	1.086	1.467	1.162	1.238	1.467	0.857	1.086	0.247
357.813	-63.965	-64.453	-66.65	-64.697	-66.528	-66.284	-66.162	-38.452	357.813	1.162	1.238	1.162	1.162	1.62	0.704	0.857	0.018
358.013	-63.965	-64.575	-66.65	-64.575	-66.65	-66.284	-66.162	-38.452	358.013	1.162	1.162	1.162	1.162	1.467	0.857	0.704	-0.059
358.213	-63.965	-64.453	-66.65	-64.697	-66.65	-66.284	-66.162	-38.574	358.213	1.162	1.086	1.162	1.162	1.238	1.01	0.857	-0.059
358.413	-63.965	-64.575	-66.772	-64.697	-66.65	-66.406	-66.162	-38.696	358.413	1.162	0.857	1.162	1.238	1.162	0.781	1.086	0.018
358.613	-63.965	-64.453	-66.772	-64.697	-66.65	-66.284	-66.04	-38.818	358.613	1.238	0.781	1.162	1.391	1.238	0.399	1.162	0.247
358.813	-63.965	-64.453	-66.65	-64.697	-66.65	-66.284	-66.162	-38.818	358.813	1.467	1.162	1.162	1.315	1.467	0.399	1.162	0.475
359.013	-63.965	-64.453	-66.65	-64.819	-66.65	-66.284	-66.04	-38.94	359.013	1.62	1.467	1.162	1.01	1.62	0.704	1.162	0.628
359.213	-63.965	-64.575	-66.65	-64.819	-66.65	-66.284	-66.162	-39.062	359.213	1.391	1.086	1.238	1.01	1.544	0.781	1.162	0.781
359.413	-63.965	-64.453	-66.65	-64.819	-66.772	-66.284	-66.162	-39.062	359.413	0.933	0.475	1.467	1.391	1.544	0.704	1.086	0.704
359.613	-63.965	-64.575	-66.65	-64.697	-66.65	-66.284	-66.04	-39.307	359.613	0.628	0.323	1.544	1.62	1.696	0.857	0.781	0.323
359.813	-63.965	-64.575	-66.65	-64.697	-66.65	-66.284	-66.04	-39.429	359.813	0.552	0.475	1.162	1.467	1.772	1.086	0.399	0.094
360.013	-63.965	-64.575	-66.65	-64.697	-66.65	-66.284	-66.04	-39.429	360.013	0.552	0.552	0.781	1.238	1.696	1.162	0.399	0.247
360.213	-63.965	-64.575	-66.65	-64.819	-66.65	-66.284	-66.04	-39.551	360.213	0.475	0.475	0.857	1.162	1.467	1.162	0.704	0.399
360.413	-63.843	-64.575	-66.65	-64.819	-66.65	-66.284	-66.04	-39.673	360.413	0.323	0.399	1.086	1.162	1.238	1.162	0.704	0.323
360.613	-63.965	-64.575	-66.65	-64.819	-66.65	-66.284	-66.04	-39.795	360.613	0.399	0.704	1.162	1.086	1.086	1.162	0.323	0.323
360.813	-63.965	-64.575	-66.65	-64.819	-66.65	-66.284	-66.04	-39.795	360.813	0.704	1.238	1.238	0.781	0.857	1.162	0.094	0.475
361.013	-63.965	-64.575	-66.65	-64.819	-66.65	-66.284	-66.162	-39.917	361.013	0.781	1.315	1.467	0.399	0.704	1.086	0.323	0.628
361.213	-63.965	-64.575	-66.65	-64.819	-66.65	-66.284	-66.162	-40.039	361.213	0.704	0.933	1.62	0.399	0.857	0.857	0.781	0.781
361.413	-63.965	-64.575	-66.65	-64.819	-66.65	-66.406	-66.04	-40.161	361.413	0.857	0.628	1.467	0.781	1.086	0.704	1.086	0.781
361.613	-64.087	-64.575	-66.65	-64.819	-66.65	-66.406	-66.162	-40.283	361.613	1.01	0.552	1.162	1.086	1.238	0.857	1.162	0.628
361.813	-64.087	-64.697	-66.65	-64.819	-66.65	-66.406	-66.04	-40.283	361.813	0.781	0.628	0.857	1.238	1.467	1.086	1.162	0.475
362.013	-64.087	-64.697	-66.65	-64.819	-66.65	-66.284	-66.04	-40.405	362.013	0.399	0.781	0.628	1.544	1.696	1.162	1.162	0.323
362.213	-63.965	-64.697	-66.65	-64.819	-66.65	-66.284	-66.04	-40.527	362.213	0.399	0.781	0.552	1.925	1.772	1.162	1.162	0.399
362.413	-63.965	-64.697	-66.772	-64.819	-66.65	-66.284	-66.162	-40.649	362.413	0.704	0.704	0.552	1.925	1.696	1.162	1.162	0.781
362.613	-64.087	-64.697	-66.65	-64.819	-66.65	-66.284	-66.162	-40.771	362.613	0.781	0.781	0.552	1.544	1.467	1.238	1.086	1.086
362.813	-63.965	-64.697	-66.65	-64.941	-66.65	-66.284	-66.162	-40.894	362.813	0.704	0.781	0.552	1.315	1.238	1.467	0.857	1.162
363.013	-63.965	-64.697	-66.65	-64.819	-66.65	-66.284	-66.162	-40.894	363.013	0.857	0.704	0.475	1.467	1.238	1.696	0.704	1.086
363.213	-64.087	-64.697	-66.772	-64.941	-66.65	-66.284	-66.04	-41.016	363.213	1.086	0.781	0.323	1.62	1.467	1.849	0.857	0.933
363.413	-64.087	-64.697	-66.65	-64.941	-66.65	-66.284	-66.162	-41.138	363.413	1.162	0.704	0.323	1.467	1.62	2.001	1.086	1.01
363.613	-64.087	-64.697	-66.65	-64.941	-66.65	-66.284	-66.162	-41.26	363.613	1.162	0.399	0.399	1.238	1.391	1.925	1.238	1.238
363.813	-64.087	-64.697	-66.65	-64.941	-66.65	-66.284	-66.04	-41.382	363.813	1.086	0.399	0.323	1.162	0.933	1.62	1.467	1.086
364.013	-63.965	-64.697	-66.65	-64.941	-66.65	-66.284	-66.162	-41.382	364.013	0.857	0.781	0.399	1.162	0.704	1.544	1.696	0.781
364.213	-63.965	-64.697	-66.65	-64.941	-66.65	-66.284	-66.162	-41.504	364.213	0.628	1.086	0.781	1.086	0.857	1.62	1.772	0.857
364.413	-63.965	-64.697	-66.65	-64.941	-66.65	-66.406	-66.162	-41.626	364.413	0.475	1.086	1.086	0.781	1.01	1.467	1.772	1.086
364.613	-63.965	-64.697	-66.772	-64.941	-66.65	-66.406	-66.04	-41.626	364.613	0.323	0.857	1.086	0.399	0.857	1.162	1.772	1.162
364.813	-64.087	-64.697	-66.65	-64.941	-66.65	-66.406	-66.162	-41.748	364.813	0.399	0.704	0.781	0.323	0.704	0.857	1.696	1.162
365.013	-63.965	-64.697	-66.65	-64.941	-66.65	-66.406	-66.162	-41.87	365.013	0.781	0.781	0.323	0.475	0.857	0.628	1.467	1.238
365.213	-64.087	-64.819	-66.65	-64.941	-66.528	-66.284	-66.162	-41.992	365.213	1.086	0.704	0.094	0.628	1.086	0.552	1.162	1.467
365.413	-64.087	-64.697	-66.65	-65.063	-66.65	-66.406	-66.162	-41.992	365.413	1.162	0.399	0.323	0.857	1.162	0.552	0.857	1.696
365.613	-63.965	-64.697	-66.65	-65.063	-66.65	-66.406	-66.04	-42.114	365.613	1.162	0.323	0.781	1.086	1.238	0.552	0.628	1.772
365.813	-63.965	-64.819	-66.65	-65.063	-66.65	-66.406	-66.04	-42.236	365.813	1.162	0.475	1.01	1.162	1.467	0.628	0.475	1.772
366.013	-63.965	-64.819	-66.65	-65.063	-66.65	-66.406	-66.04	-42.358	366.013	1.086	0.552	0.857	1.162	1.62	0.857	0.323	1.772
366.213	-63.965	-64.819	-66.65	-65.063	-66.65	-66.406	-66.04	-42.48	366.213	0.857	0.552	0.704	1.162	1.467	1.086	0.399	1.696
366.413	-63.965	-64.819	-66.65	-65.063	-66.65	-66.406	-66.04	-42.48	366.413	0.628	0.628	0.781	1.162	1.238	1.238	0.781	1.467
366.613	-63.965	-64.819	-66.65	-65.063	-66.65	-66.406	-66.162	-42.603	366.613	0.552	0.781	0.704	1.162	1.162	1.391	1.086	1.238
366.813	-63.965	-64.941	-66.65	-65.063	-66.65	-66.406	-66.162	-42.725	366.813	0.628	0.704	0.399	1.086	1.162	1.315	1.162	1.162
367.013	-64.087	-64.941	-66.65	-65.063	-66.528	-66.406	-66.162	-42.847	367.013	0.857	0.323	0.399	0.857	1.162	1.01	1.162	1.162
367.213	-64.087	-64.941	-66.65	-65.063	-66.65	-66.406	-66.162	-42.847	367.213	1.01	0.094	0.704	0.628	1.162	0.933	1.238	1.238
367.413	-64.087	-64.819	-66.65	-65.063	-66.65	-66.406	-66.162	-42.969	367.413	0.857	0.323	0.704	0.475	1.162	1.01	1.467	1.467
367.613	-64.087	-64.819	-66.65	-65.063	-66.528	-66.406	-66.162	-43.091	367.613	0.704	0.704	0.399	0.323	1.162	0.857	1.62	1.544
367.813	-64.087	-64.941	-66.65	-65.186	-66.65	-66.406	-66.162	-43.213	367.813	0.857	0.781	0.323	0.399	1.086	0.704	1.467	1.086
368.013	-63.965	-64.941	-66.65	-65.063	-66.528	-66.406	-66.162	-43.335	368.013	1.086	0.704	0.399	0.781	0.857	0.857	1.238	0.475
368.213	-63.965	-64.941	-66.65	-65.063	-66.528	-66.528	-66.162	-43.335	368.213	1.162	0.857	0.323	1.086	0.781	1.086	1.162	0.399
368.413	-64.087	-64.941	-66.65	-65.063	-66.528	-66.406	-66.04	-43.457	368.413	1.238	1.086	0.399	1.086	1.086	1.162	1.162	0.781
368.613	-64.087	-64.941	-66.65	-65.063	-66.65	-66.406	-66.04	-43.579	368.613	1.467	1.086	0.781	0.781	1.162	1.162	1.162	1.086
368.813	-64.087	-64.941	-66.65	-65.063	-66.65	-66.406	-66.162	-43.701	368.813	1.62	0.857	1.086	0.399	0.704	1.162	1.162	1.162
369.013	-64.087	-64.941	-66.772	-65.063	-66.65	-66.528	-66.162	-43.823	369.013	1.467	0.704	1.162	0.399	0.475	1.162	1.162	1.162
369.213	-64.087	-64.941	-66.65	-65.186	-66.65	-66.406	-66.162	-43.823	369.213	1.315	0.857	1.086	0.781	0.781	1.238	1.086	1.162
369.413	-64.087	-64.941	-66.65	-65.186	-66.65	-66.406	-66.162	-43.823	369.413	1.467	1.086	0.781	1.01	1.086	1.391	0.857	1.238
369.613	-63.965	-64.941	-66.65	-65.186	-66.65	-66.406	-66.162	-44.067	369.613	1.62	1.238	0.475	0.857	1.086	1.315	0.704	1.391
369.813	-64.087	-64.941	-66.65	-65.186	-66.65	-66.406	-66.04	-44.067	369.813	1.391	1.467	0.781	0.781	0.857	0.933	0.933	1.238
370.013	-63.965	-64.941	-66.65	-65.186	-66.65	-66.406	-66.162	-44.189	370.013	0.933	1.696	1.544	1.162	0.704	0.628	1.391	0.781
370.213	-64.087	-64.941	-66.65	-65.186	-66.65	-66.406	-66.162	-44.312	370.213	0.781	1.772	1.849	1.467	0.857	0.628	1.544	0.781
370.413	-63.965	-64.941	-66.65	-65.186	-66.65	-66.406	-66.162	-44.312	370.413	1.162	1.696	1.544	1.086	1.01	0.857	1.162	1.162
370.613	-63.965	-64.941	-66.65	-65.186	-66.65	-66.406	-66.162	-44.434	370.613	1.544	1.467	1.238	0.475	0.857	1.01	0.781	1.086
370.813	-63.965	-64.941	-66.65	-65.186	-66.528	-66.406	-66.162	-44.556	370.813	1.467	1.315	1.086	0.399	0.704	0.857	0.857	0.781
371.013	-63.965	-64.941	-66.772	-65.186	-66.65	-66.528	-66.162	-44.678	371.013	1.238	1.467	0.781	0.781	0.857	0.704	1.086	0.857
371.213	-64.087	-64.941	-66.65	-65.186	-66.65	-66.406	-66.162	-44.8	371.213	1.162	1.544	0.399	1.086	1.086	0.857	1.162	1.086
371.414	-64.087	-65.063	-66.65	-65.186	-66.65	-66.528	-66.162	-44.922	371.414	1.162	1.162	0.399	1.086	1.086	1.086	1.238	1.086
371.614	-63.965	-64.941	-66.65	-65.308	-66.65	-66.528	-66.162	-44.922	371.614	1.162	0.857	0.781	0.857	0.781	1.162	1.391	0.857
371.814	-63.965	-64.941	-66.65	-65.186	-66.528	-66.406	-66.162	-45.044	371.814	1.162	1.162	1.086	0.704	0.399	1.162	1.315	0.704
372.014	-63.965	-64.941	-66.65	-65.186	-66.65	-66.406	-66.162	-45.166	372.014	1.238	1.544	1.162	0.857	0.399	1.086	1.01	0.857
372.214	-63.965	-64.941	-66.65	-65.186	-66.528	-66.528	-66.162	-45.288	372.214	1.467	1.467	1.162	1.086	0.704	0.857	0.857	1.086
372.414	-64.087	-64.941	-66.65	-65.186	-66.528	-66.528	-66.04	-45.288	372.414	1.62	1.315	1.162	1.162	0.781	0.628	0.781	1.01
372.614	-64.087	-64.941	-66.65	-65.186	-66.528	-66.406	-66.162	-45.41	372.614	1.467	1.544	1.162	1.162	0.704	0.475	0.704	0.552
372.814	-64.087	-64.941	-66.65	-65.308	-66.528	-66.528	-66.162	-45.41	372.814	1.238	1.925	1.086	1.162	0.781	0.399	0.781	0.247
373.014	-63.965	-65.063	-66.65	-65.186	-66.528	-66.528	-66.162	-45.532	373.014	1.162	1.925	0.933	1.086	0.781	0.704	0.781	0.475
373.214	-63.965	-64.941	-66.528	-65.186	-66.528	-66.528	-66.04	-45.654	373.214	1.162	1.62	1.01	0.857	0.704	1.162	0.781	0.628
373.414	-64.087	-65.063	-66.528	-65.308	-66.528	-66.406	-66.162	-45.776	373.414	1.162	1.544	1.315	0.704	0.857	1.086	1.162	0.399
373.614	-64.087	-65.063	-66.65	-65.308	-66.528	-66.406	-66.162	-45.776	373.614	1.162	1.544	1.315	0.857	1.086	0.781	1.467	0.399
373.814	-64.087	-64.941	-66.65	-65.186	-66.528	-66.528	-66.04	-45.898	373.814	1.238	1.086	1.01	1.086	1.086	0.781	1.162	0.781
374.014	-64.087	-64.941	-66.65	-65.308	-66.528	-66.528	-66.162	-45.898	374.014	1.467	0.475	1.01	1.162	0.857	0.781	0.781	1.01
374.214	-64.087	-64.941	-66.65	-65.308	-66.528	-66.528	-66.162	-46.143	374.214	1.62	0.399	1.315	1.162	0.704	0.704	0.781	0.857
374.414	-64.087	-65.063	-66.528	-65.308	-66.528	-66.528	-66.162	-46.265	374.414	1.467	0.781	1.315	1.162	0.857	0.857	0.704	0.704
374.614	-64.087	-65.063	-66.65	-65.308	-66.528	-66.528	-66.162	-46.265	374.614	1.238	1.086	0.933	1.162	1.086	1.086	0.323	0.857
374.814	-64.087	-65.063	-66.65	-65.186	-66.65	-66.528	-66.162	-46.265	374.814	1.162	1.162	0.781	1.162	1.162	1.162	0.094	1.086
375.014	-64.087	-65.063	-66.65	-65.308	-66.65	-66.406	-66.162	-46.387	375.014	1.162	1.162	1.162	1.162	1.086	1.162	0.323	1.086
375.214	-64.087	-65.063	-66.65	-65.308	-66.65	-66.528	-66.04	-46.509	375.214	1.086	1.162	1.544	1.162	0.857	1.162	0.704	0.857
375.414	-64.087	-65.063	-66.65	-65.308	-66.65	-66.528	-66.162	-46.631	375.414	0.933	1.162	1.467	1.162	0.704	1.162	0.704	0.704
375.614	-64.087	-65.063	-66.65	-65.308	-66.528	-66.528	-66.162	-46.753	375.614	1.01	1.162	1.238	1.162	0.857	1.162	0.399	0.781
375.814	-64.087	-65.063	-66.772	-65.186	-66.65	-66.528	-66.162	-46.875	375.814	1.315	1.162	1.238	1.162	1.086	1.086	0.399	0.781
376.014	-64.087	-65.063	-66.65	-65.308	-66.528	-66.528	-66.162	-46.875	376.014	1.391	1.238	1.467	1.162	1.162	0.857	0.781	0.628
376.214	-63.965	-65.063	-66.772	-65.308	-66.528	-66.528	-66.162	-46.997	376.214	1.315	1.467	1.62	1.162	1.086	0.704	1.01	0.552
376.414	-63.965	-65.063	-66.65	-65.308	-66.528	-66.528	-66.162	-47.119	376.414	1.467	1.62	1.467	1.162	0.781	0.781	0.781	0.628
376.614	-63.965	-65.063	-66.65	-65.43	-66.65	-66.406	-66.162	-47.241	376.614	1.62	1.467	1.238	1.162	0.323	0.704	0.399	0.781
376.814	-63.965	-65.063	-66.65	-65.308	-66.528	-66.528	-66.162	-47.363	376.814	1.391	1.238	1.162	1.162	0.094	0.323	0.399	0.704
377.014	-63.965	-65.063	-66.65	-65.308	-66.528	-66.528	-66.162	-47.363	377.014	0.933	1.162	1.162	1.162	0.399	0.094	0.704	0.399
377.214	-63.965	-65.063	-66.65	-65.43	-66.528	-66.406	-66.04	-47.485	377.214	0.704	1.162	1.162	1.162	1.086	0.323	0.781	0.399
377.414	-63.965	-65.186	-66.65	-65.308	-66.528	-66.528	-66.162	-47.607	377.414	0.857	1.162	1.162	1.162	1.467	0.704	0.704	0.781
377.614	-63.965	-65.063	-66.65	-65.308	-66.528	-66.528	-66.162	-47.607	377.614	1.086	1.162	1.162	1.162	1.162	0.781	0.857	1.01
377.814	-64.087	-65.063	-66.65	-65.43	-66.528	-66.406	-66.162	-47.729	377.814	1.086	1.162	1.162	1.238	0.857	0.704	1.01	0.781
378.014	-63.965	-65.063	-66.65	-65.43	-66.528	-66.406	-66.162	-47.852	378.014	0.857	1.162	1.162	1.467	1.162	0.857	0.857	0.399
378.214	-64.087	-65.063	-66.65	-65.43	-66.528	-66.528	-66.04	-47.852	378.214	0.704	1.162	1.162	1.62	1.544	1.01	0.704	0.323
378.414	-64.087	-65.063	-66.65	-65.43	-66.528	-66.528	-66.162	-47.974	378.414	0.781	1.162	1.162	1.467	1.467	0.781	0.857	0.475
378.614	-64.087	-65.063	-66.528	-65.43	-66.528	-66.528	-66.04	-48.096	378.614	0.781	1.162	1.162	1.315	1.238	0.399	1.01	0.552
378.814	-63.965	-65.063	-66.65	-65.308	-66.528	-66.528	-66.04	-48.096	378.814	0.704	1.162	1.086	1.467	1.238	0.323	0.781	0.475
379.014	-64.087	-65.063	-66.65	-65.43	-66.528	-66.528	-66.04	-48.096	379.014	0.857	1.086	0.857	1.62	1.467	0.475	0.399	0.323
379.214	-64.087	-65.063	-66.65	-65.308	-66.528	-66.528	-66.04	-48.218	379.214	1.01	0.857	0.781	1.544	1.62	0.552	0.399	0.323
379.414	-64.087	-65.063	-66.65	-65.308	-66.528	-66.528	-66.04	-48.34	379.414	0.781	0.704	1.162	1.544	1.467	0.552	0.781	0.475
379.614	-64.087	-65.186	-66.65	-65.43	-66.528	-66.528	-66.04	-48.34	379.614	0.399	0.857	1.544	1.62	1.238	0.628	1.086	0.628
379.814	-64.087	-65.186	-66.65	-65.43	-66.528	-66.528	-66.04	-48.584	379.814	0.399	1.086	1.467	1.467	1.086	0.933	1.086	0.857
380.014	-64.087	-65.063	-66.65	-65.43	-66.528	-66.528	-66.04	-48.584	380.014	0.781	1.086	1.238	1.238	0.857	1.391	0.857	1.01
380.214	-64.087	-65.063	-66.65	-65.43	-66.528	-66.528	-66.04	-48.584	380.214	1.01	0.857	1.162	1.238	0.704	1.62	0.704	0.781
380.414	-64.087	-65.063	-66.65	-65.43	-66.528	-66.528	-66.04	-48.706	380.414	0.857	0.628	1.086	1.467	0.857	1.467	0.781	0.399
380.614	-64.087	-65.063	-66.528	-65.43	-66.528	-66.528	-66.04	-48.828	380.614	0.704	0.475	0.933	1.62	1.086	1.238	0.704	0.323
380.814	-64.087	-65.063	-66.528	-65.43	-66.528	-66.528	-66.162	-48.95	380.814	0.857	0.323	1.01	1.467	1.162	1.238	0.399	0.399
381.014	-64.087	-65.186	-66.65	-65.43	-66.528	-66.528	-66.162	-48.95	381.014	1.01	0.323	1.315	1.315	1.162	1.391	0.475	0.247
381.214	-64.209	-65.186	-66.65	-65.43	-66.528	-66.528	-66.162	-49.072	381.214	0.781	0.399	1.391	1.467	1.162	1.391	1.086	0.018
381.414	-64.087	-65.186	-66.65	-65.552	-66.65	-66.528	-66.04	-49.194	381.414	0.399	0.323	1.238	1.544	1.162	1.315	1.467	-0.059
381.614	-64.087	-65.186	-66.65	-65.43	-66.65	-66.528	-66.04	-49.316	381.614	0.323	0.399	1.086	1.162	1.162	1.391	1.162	0.018
381.814	-64.087	-65.186	-66.65	-65.43	-66.528	-66.528	-66.04	-49.438	381.814	0.399	0.704	0.857	0.781	1.162	1.391	0.781	0.323
382.014	-64.087	-65.063	-66.65	-65.43	-66.528	-66.528	-66.04	-49.438	382.014	0.247	0.781	0.628	0.933	1.162	1.238	0.857	0.704
382.214	-64.087	-65.063	-66.65	-65.552	-66.528	-66.528	-66.04	-49.561	382.214	0.094	0.704	0.552	1.391	1.162	1.162	1.086	0.781
382.414	-64.087	-65.186	-66.65	-65.43	-66.528	-66.528	-66.162	-49.683	382.414	0.323	0.781	0.628	1.544	1.162	1.238	1.162	0.704
382.614	-64.087	-65.186	-66.65	-65.552	-66.528	-66.406	-66.04	-49.805	382.614	0.781	0.781	0.857	1.162	1.162	1.467	1.162	0.857
382.814	-64.087	-65.186	-66.65	-65.552	-66.528	-66.406	-66.04	-49.805	382.814	1.086	0.628	1.01	0.781	1.162	1.62	1.086	1.086
383.014	-63.965	-65.186	-66.65	-65.552	-66.528	-66.528	-66.04	-49.805	383.014	1.086	0.552	0.781	0.933	1.238	1.544	0.781	1.162
383.214	-64.087	-65.186	-66.772	-65.552	-66.528	-66.528	-66.04	-49.927	383.214	0.857	0.628	0.399	1.391	1.544	1.62	0.399	1.162
383.414	-64.087	-65.186	-66.65	-65.552	-66.528	-66.406	-66.04	-50.049	383.414	0.704	0.781	0.323	1.62	1.925	1.849	0.399	1.238
383.614	-63.965	-65.063	-66.65	-65.552	-66.528	-66.528	-66.162	-50.171	383.614	0.781	0.781	0.399	1.467	1.925	1.62	0.781	1.467
383.814	-63.965	-65.186	-66.65	-65.552	-66.528	-66.528	-66.162	-50.293	383.814	0.781	0.704	0.247	1.238	1.544	1.086	1.162	1.544
384.014	-63.965	-65.186	-66.65	-65.552	-66.528	-66.528	-66.162	-50.293	384.014	0.628	0.857	0.094	1.162	1.315	0.933	1.467	1.162
384.214	-64.087	-65.186	-66.65	-65.552	-66.528	-66.528	-66.162	-50.415	384.214	0.552	1.01	0.323	1.162	1.467	1.086	1.62	0.857
384.414	-64.087	-65.186	-66.65	-65.552	-66.528	-66.528	-66.04	-50.415	384.414	0.552	0.781	0.781	1.162	1.62	1.238	1.467	1.162
384.614	-64.087	-65.186	-66.65	-65.552	-66.406	-66.528	-66.162	-50.537	384.614	0.552	0.399	1.01	1.238	1.467	1.467	1.238	1.544
384.814	-64.087	-65.186	-66.65	-65.552	-66.528	-66.528	-66.162	-50.659	384.814	0.552	0.399	0.781	1.391	1.238	1.62	1.162	1.467
385.014	-64.087	-65.186	-66.65	-65.552	-66.406	-66.528	-66.162	-50.659	385.014	0.552	0.781	0.323	1.315	1.238	1.467	1.162	1.238
385.214	-64.087	-65.186	-66.65	-65.552	-66.528	-66.528	-66.162	-50.781	385.214	0.628	1.01	0.094	0.933	1.467	1.162	1.162	1.238
385.414	-64.087	-65.186	-66.65	-65.552	-66.528	-66.528	-66.162	-50.903	385.414	0.857	0.857	0.323	0.628	1.62	0.857	1.238	1.467
385.614	-64.087	-65.186	-66.65	-65.552	-66.528	-66.65	-66.162	-50.903	385.614	1.01	0.704	0.704	0.628	1.391	0.704	1.467	1.62
385.814	-64.087	-65.186	-66.65	-65.552	-66.528	-66.528	-66.162	-50.903	385.814	0.781	0.857	0.704	0.857	0.933	0.933	1.696	1.467
386.014	-64.087	-65.063	-66.65	-65.552	-66.528	-66.528	-66.162	-51.025	386.014	0.399	1.01	0.399	1.01	0.704	1.391	1.772	1.238
386.214	-64.087	-65.186	-66.65	-65.552	-66.528	-66.65	-66.162	-51.025	386.214	0.323	0.781	0.323	0.781	0.857	1.62	1.696	1.162
386.414	-64.087	-65.308	-66.528	-65.552	-66.528	-66.528	-66.04	-51.147	386.414	0.475	0.399	0.475	0.399	1.086	1.467	1.467	1.162
386.614	-64.209	-65.308	-66.528	-65.552	-66.528	-66.528	-66.162	-51.27	386.614	0.552	0.475	0.628	0.399	1.238	1.238	1.238	1.086
386.814	-64.087	-65.186	-66.528	-65.552	-66.528	-66.65	-66.04	-51.27	386.814	0.552	1.086	0.857	0.704	1.467	1.162	1.162	0.857
387.014	-64.087	-65.186	-66.65	-65.552	-66.65	-66.528	-66.162	-51.392	387.014	0.628	1.467	1.086	0.781	1.544	1.162	1.238	0.781
387.214	-64.209	-65.186	-66.528	-65.674	-66.528	-66.528	-66.04	-51.514	387.214	0.857	1.162	1.162	0.704	1.162	1.162	1.467	1.162
387.414	-64.087	-65.186	-66.528	-65.674	-66.65	-66.528	-66.04	-51.636	387.414	1.086	0.781	1.086	0.857	0.781	1.162	1.62	1.544
387.614	-64.209	-65.186	-66.528	-65.674	-66.528	-66.528	-66.162	-51.636	387.614	1.162	0.781	0.781	1.01	0.781	1.162	1.544	1.467
387.814	-64.209	-65.186	-66.528	-65.674	-66.528	-66.528	-66.04	-51.758	387.814	1.238	0.704	0.399	0.857	0.857	1.162	1.544	1.238
388.014	-64.087	-65.186	-66.528	-65.674	-66.528	-66.528	-66.162	-51.88	388.014	1.467	0.399	0.323	0.628	0.933	1.162	1.62	1.162
388.214	-64.087	-65.186	-66.65	-65.674	-66.528	-66.528	-66.162	-51.88	388.214	1.62	0.323	0.475	0.475	1.01	1.162	1.467	1.086
388.414	-64.087	-65.186	-66.65	-65.674	-66.528	-66.528	-66.162	-52.002	388.414	1.467	0.399	0.628	0.323	0.933	1.238	1.238	0.857
388.614	-64.087	-65.186	-66.65	-65.674	-66.528	-66.528	-66.162	-52.124	388.614	1.238	0.247	0.857	0.323	0.857	1.467	1.162	0.781
388.814	-64.087	-65.186	-66.528	-65.674	-66.406	-66.528	-66.162	-52.124	388.814	1.162	0.094	1.086	0.399	0.781	1.62	1.238	1.162
389.014	-64.087	-65.308	-66.65	-65.674	-66.528	-66.528	-66.162	-52.246	389.014	1.162	0.323	1.086	0.323	0.704	1.467	1.467	1.467
389.214	-64.087	-65.186	-66.528	-65.674	-66.528	-66.528	-66.162	-52.246	389.214	1.162	0.781	0.781	0.399	0.857	1.238	1.62	1.162
389.414	-64.087	-65.186	-66.65	-65.674	-66.528	-66.528	-66.162	-52.368	389.414	1.162	1.086	0.399	0.704	1.01	1.162	1.391	0.857
389.614	-64.087	-65.186	-66.65	-65.674	-66.528	-66.528	-66.162	-52.49	389.614	1.238	1.162	0.475	0.781	0.781	1.086	0.933	1.162
389.814	-64.087	-65.308	-66.65	-65.674	-66.406	-66.528	-66.162	-52.612	389.814	1.467	1.162	1.086	0.704	0.323	0.857	0.704	1.467
390.014	-64.087	-65.308	-66.528	-65.674	-66.406	-66.65	-66.284	-52.612	390.014	1.62	1.162	1.467	0.781	0.094	0.704	0.857	1.086
390.214	-64.087	-65.308	-66.528	-65.674	-66.406	-66.528	-66.284	-52.734	390.214	1.544	1.162	1.162	0.704	0.323	0.857	1.086	0.475
390.414	-64.087	-65.186	-66.65	-65.674	-66.406	-66.528	-66.284	-52.734	390.414	1.62	1.162	0.704	0.323	0.781	1.01	1.162	0.399
390.614	-64.087	-65.308	-66.65	-65.674	-66.528	-66.528	-66.284	-52.856	390.614	1.925	1.162	0.475	0.094	1.086	0.857	1.162	0.781
390.814	-63.965	-65.308	-66.65	-65.674	-66.528	-66.528	-66.284	-52.979	390.814	1.925	1.162	0.247	0.247	1.238	0.704	1.162	1.086
391.014	-64.087	-65.308	-66.65	-65.674	-66.528	-66.528	-66.284	-52.979	391.014	1.544	1.162	0.094	0.475	1.467	0.857	1.162	1.162
391.214	-64.087	-65.308	-66.528	-65.796	-66.528	-66.528	-66.284	-52.979	391.214	1.238	1.162	0.323	0.552	1.62	1.01	1.162	1.238
391.414	-64.087	-65.308	-66.528	-65.796	-66.528	-66.65	-66.284	-53.101	391.414	1.162	1.162	0.704	0.552	1.391	0.781	1.162	1.467
391.614	-64.087	-65.308	-66.528	-65.796	-66.528	-66.528	-66.284	-53.101	391.614	1.162	1.238	0.781	0.628	0.933	0.323	1.086	1.62
391.814	-64.087	-65.308	-66.528	-65.674	-66.528	-66.65	-66.284	-53.223	391.814	1.162	1.467	0.628	0.857	0.704	0.094	0.857	1.467
392.014	-64.087	-65.186	-66.528	-65.674	-66.528	-66.65	-66.162	-53.345	392.014	1.162	1.62	0.628	1.01	0.781	0.247	0.704	1.238
392.214	-64.087	-65.308	-66.528	-65.796	-66.528	-66.65	-66.284	-53.467	392.214	1.162	1.467	0.933	0.781	0.704	0.399	0.857	1.162
392.414	-64.087	-65.308	-66.528	-65.674	-66.528	-66.528	-66.284	-53.467	392.414	1.162	1.315	1.238	0.399	0.323	0.323	1.086	1.162
392.614	-64.087	-65.308	-66.528	-65.674	-66.528	-66.65	-66.162	-53.589	392.614	1.162	1.544	1.086	0.399	0.094	0.399	1.086	1.162
392.814	-64.087	-65.308	-66.528	-65.796	-66.528	-66.65	-66.284	-53.589	392.814	1.162	1.925	0.781	0.704	0.323	0.704	0.857	1.162
393.014	-64.087	-65.308	-66.528	-65.796	-66.528	-66.65	-66.162	-53.711	393.014	1.162	1.925	0.857	0.781	0.781	0.781	0.704	1.162
393.214	-64.087	-65.308	-66.528	-65.796	-66.528	-66.528	-66.162	-53.711	393.214	1.162	1.62	1.086	0.704	1.01	0.704	0.857	1.162
393.414	-64.209	-65.308	-66.528	-65.796	-66.528	-66.65	-66.284	-53.833	393.414	1.162	1.544	1.238	0.857	0.857	0.781	1.086	1.162
393.614	-64.209	-65.308	-66.528	-65.796	-66.528	-66.65	-66.284	-53.955	393.614	1.238	1.544	1.467	1.086	0.628	0.781	1.162	1.162
393.814	-64.087	-65.308	-66.528	-65.796	-66.528	-66.65	-66.284	-53.955	393.814	1.544	1.086	1.62	1.162	0.552	0.628	1.086	1.162
394.014	-64.087	-65.43	-66.528	-65.674	-66.406	-66.65	-66.284	-54.077	394.014	1.925	0.475	1.467	1.162	0.552	0.475	0.781	1.162
394.214	-64.209	-65.43	-66.528	-65.796	-66.528	-66.528	-66.284	-54.077	394.214	1.925	0.399	1.238	1.162	0.552	0.247	0.399	1.086
394.414	-64.209	-65.308	-66.528	-65.674	-66.528	-66.528	-66.284	-54.199	394.414	1.544	0.704	1.162	1.162	0.552	0.094	0.323	0.857
394.614	-64.087	-65.43	-66.528	-65.674	-66.528	-66.65	-66.162	-54.199	394.614	1.315	0.781	1.238	1.162	0.475	0.323	0.475	0.704
394.814	-64.209	-65.43	-66.528	-65.674	-66.528	-66.65	-66.162	-54.321	394.814	1.467	0.704	1.467	1.162	0.323	0.781	0.628	0.857
395.014	-64.209	-65.308	-66.528	-65.796	-66.406	-66.65	-66.284	-54.443	395.014	1.62	0.857	1.62	1.162	0.323	1.01	0.857	1.01
395.214	-64.209	-65.43	-66.528	-65.796	-66.406	-66.528	-66.284	-54.443	395.214	1.467	1.162	1.391	1.162	0.552	0.857	1.01	0.781
395.414	-64.209	-65.308	-66.65	-65.674	-66.406	-66.528	-66.284	-54.565	395.414	1.238	1.467	0.933	1.162	0.933	0.628	0.781	0.399
395.614	-64.209	-65.308	-66.528	-65.796	-66.406	-66.65	-66.284	-54.688	395.614	1.162	1.62	0.704	1.162	1.238	0.475	0.323	0.399
395.814	-64.087	-65.43	-66.65	-65.796	-66.528	-66.65	-66.284	-54.688	395.814	1.162	1.467	0.857	1.162	1.01	0.247	0.018	0.704
396.014	-64.087	-65.43	-66.65	-65.796	-66.406	-66.528	-66.406	-54.688	396.014	1.162	1.238	1.086	1.238	0.475	0.094	0.018	0.704
396.214	-64.087	-65.308	-66.528	-65.796	-66.406	-66.65	-66.284	-54.81	396.214	1.162	1.162	1.086	1.467	0.399	0.247	0.323	0.399
396.414	-64.087	-65.43	-66.528	-65.796	-66.406	-66.65	-66.406	-54.81	396.414	1.162	1.162	0.857	1.62	0.704	0.475	0.704	0.399
396.614	-64.087	-65.308	-66.65	-65.796	-66.528	-66.528	-66.284	-54.932	396.614	1.162	1.238	0.704	1.544	0.704	0.628	0.781	0.704
396.814	-64.087	-65.308	-66.65	-65.796	-66.528	-66.528	-66.406	-54.932	396.814	1.162	1.544	0.857	1.62	0.399	0.857	0.628	0.704
397.014	-64.087	-65.43	-66.528	-65.796	-66.406	-66.65	-66.406	-55.054	397.014	1.086	1.925	1.086	1.925	0.399	1.01	0.552	0.323
397.214	-64.209	-65.43	-66.528	-65.796	-66.528	-66.65	-66.406	-55.054	397.214	0.857	1.925	1.162	1.925	0.704	0.857	0.552	0.094
397.414	-64.087	-65.43	-66.528	-65.674	-66.406	-66.65	-66.284	-55.054	397.414	0.704	1.467	1.162	1.544	0.781	0.628	0.552	0.247
397.614	-64.087	-65.43	-66.528	-65.674	-66.406	-66.65	-66.284	-54.932	397.614	0.857	0.933	1.162	1.238	0.704	0.552	0.628	0.399
397.814	-64.209	-65.43	-66.528	-65.796	-66.528	-66.65	-66.284	-54.81	397.814	1.086	0.704	1.238	1.238	0.857	0.628	0.857	0.323
398.014	-64.209	-65.308	-66.528	-65.674	-66.528	-66.65	-66.284	-54.565	398.014	1.162	0.857	1.467	1.467	1.162	0.857	1.01	0.323
398.214	-64.209	-65.43	-66.528	-65.674	-66.528	-66.528	-66.284	-54.443	398.214	1.162	1.01	1.62	1.62	1.467	1.01	0.781	0.475
398.414	-64.209	-65.43	-66.528	-65.796	-66.528	-66.528	-66.284	-54.077	398.414	1.086	0.857	1.544	1.467	1.62	0.857	0.323	0.628
398.614	-64.209	-65.43	-66.528	-65.674	-66.528	-66.65	-66.284	-53.955	398.614	0.857	0.704	1.544	1.315	1.544	0.628	0.018	0.781
398.815	-64.209	-65.308	-66.65	-65.796	-66.528	-66.65	-66.284	-53.589	398.815	0.704	0.857	1.544	1.391	1.544	0.475	0.018	0.781
399.015	-64.209	-65.308	-66.528	-65.796	-66.528	-66.65	-66.284	-53.101	399.015	0.781	1.086	1.162	1.391	1.62	0.323	0.323	0.704
399.215	-64.087	-65.43	-66.528	-65.796	-66.528	-66.65	-66.284	-52.856	399.215	0.781	1.162	0.781	1.315	1.467	0.399	0.781	0.857
399.415	-64.087	-65.43	-66.528	-65.796	-66.528	-66.65	-66.406	-52.49	399.415	0.704	1.162	0.857	1.391	1.162	0.781	1.086	1.01
399.615	-64.087	-65.43	-66.65	-65.796	-66.528	-66.65	-66.284	-52.002	399.615	0.857	1.162	1.086	1.391	0.933	1.086	1.086	0.781
399.815	-64.209	-65.43	-66.528	-65.796	-66.406	-66.528	-66.284	-51.636	399.815	1.01	1.162	1.162	1.238	1.01	1.238	0.857	0.399
[truncated: 25,501 more rows]
