# Supplementary material for: Self-restoration of cardiac excitation rhythm by anti-arrhythmic ion channel gating
Source: eLife. 2020 Jun 8;9:e55921. doi: 10.7554/eLife.55921 (PMC7316504; doi:10.7554/eLife.55921)
Supplement: Figure 5—source data 3. [file elife-55921-fig5-data3.csv]

apd90	cyclelength
203.2	310
310	230
48.15	105
167.28	125
103.48	125
98.9	125
133.43	167
